# Supplementary material for: Sexual and Apogamous Species of Woodferns Show Different Protein and Phytohormone Profiles
Source: Front Plant Sci. 2021 Nov 12;12:718932. doi: 10.3389/fpls.2021.718932 (PMC8633544; doi:10.3389/fpls.2021.718932)
Supplement: Supplementary file 1 [file Table_1.xlsx]

## Sheet: Hoja1
Scaffold						Heuristics for differental expression				Mapping to Selaginella						Mapping to Arabidopsis
List	FirstAccession_p1222	Idx	Identified Proteins	Accession Number	Molecular Weight	Quantifyable	log2Ratio_DACvsDOC	DEP	UpOrDown	MappedOrNot	SELML_ortho	RankingForFoldChange_DAC_vs_DOC	SELML_geneName	blastEvalue	Selaginella_uniprot	FirstAccession_p1222	Arabidopsis_uniprot	uniprotAccessions	GeneName	mappedAra-Evalue								A
Scaffold	60337-326_4_ORF2	236	>sp|P31170|HS25P_ARATH_25.3_kDa_heat_shock_protein,_chloroplastic_OS=Arabidopsis_thaliana_GN=HSP25.3_PE=2_SV=1|||4e-47	60337-326_4_ORF2	25kDa	1	4.39	1	DAC	mapped	D8RJR5	1	D8RJR5_SELML	5.07239e-32	tr|D8RJR5|D8RJR5_SELML	60337-326_4_ORF2	sp|P31170|HS25P_ARATH	P31170	HS25P_ARATH	1.9508e-43
Scaffold	ZZ_FGCZCont0006	752	sp|K1H6_HUMAN|	ZZ_FGCZCont0006 (+1)	52 kDa	1	4.17	1	DAC	notMapped		2				ZZ_FGCZCont0006	tr|Q8H0S3|Q8H0S3_ARATH	Q8H0S3	Q8H0S3_ARATH	0
Scaffold	tr|A9RS28|A9RS28_PHYPA	440	Predicted protein OS=Physcomitrella patens subsp. patens GN=PHYPADRAFT_177617 PE=4 SV=1	tr|A9RS28|A9RS28_PHYPA	34 kDa	1	3.7	1	DAC	mapped	D8TBN9	3	D8TBN9_SELML	1.30959e-144	tr|D8TBN9|D8TBN9_SELML	tr|A9RS28|A9RS28_PHYPA	sp|Q9S841|PSBO2_ARATH	Q9S841	PSBO2_ARATH	6.61991e-141
Scaffold	tr|D9ZBG9|D9ZBG9_9CARY	6	Glyceraldehyde-3-phosphate dehydrogenase (Fragment) OS=Schiedea globosa PE=4 SV=1	tr|D9ZBG9|D9ZBG9_9CARY (+1)	8 kDa	1	3.58	1	DAC	mapped	D8RB93	4	D8RB93_SELML	1.43105e-33	tr|D8RB93|D8RB93_SELML	tr|D9ZBG9|D9ZBG9_9CARY	sp|P25858|G3PC1_ARATH	P25858	G3PC1_ARATH	2.27637e-39
Scaffold	78598-284_1_ORF2	1094	>sp|O75533|SF3B1_HUMAN_Splicing_factor_3B_subunit_1_OS=Homo_sapiens_GN=SF3B1_PE=1_SV=3|||0	78598-284_1_ORF2	143 kDa	1	3.46	1	DAC	mapped	D8RMG5	5	D8RMG5_SELML	0	tr|D8RMG5|D8RMG5_SELML	78598-284_1_ORF2	tr|Q9FMF9|Q9FMF9_ARATH	Q9FMF9	Q9FMF9_ARATH	0
Scaffold	114388-232_5_ORF2	354	>sp|O80362|RK10_TOBAC_50S_ribosomal_protein_L10,_chloroplastic_OS=Nicotiana_tabacum_GN=RPL10_PE=2_SV=1|||5e-101	114388-232_5_ORF2	30 kDa	1	3.46	1	DAC	mapped	D8SHN8	6	D8SHN8_SELML	5.77316e-100	tr|D8SHN8|D8SHN8_SELML	114388-232_5_ORF2	sp|Q9FY50|RK10_ARATH	Q9FY50	RK10_ARATH	1.90726e-90
Scaffold	tr|F2DUF9|F2DUF9_HORVD	1076	Predicted protein OS=Hordeum vulgare var. distichum PE=2 SV=1	tr|F2DUF9|F2DUF9_HORVD	117 kDa	1	3.32	1	DAC	mapped	D8RCP7	7	D8RCP7_SELML	0	tr|D8RCP7|D8RCP7_SELML	tr|F2DUF9|F2DUF9_HORVD	tr|F4K6B8|F4K6B8_ARATH	F4K6B8	F4K6B8_ARATH	0
Scaffold	68276-306_3_ORF2	734	>sp|Q94CD1|HHT1_ARATH_Omega-hydroxypalmitate_O-feruloyl_transferase_OS=Arabidopsis_thaliana_GN=HHT1_PE=1_SV=1|||5e-96	68276-306_3_ORF2	51 kDa	1	3.32	1	DAC	mapped	D8R974	8	D8R974_SELML	2.7018e-157	tr|D8R974|D8R974_SELML	68276-306_3_ORF2	tr|F4JWW6|F4JWW6_ARATH	F4JWW6	F4JWW6_ARATH	5.98768e-93
Scaffold	170904-166_2_ORF1	644	>sp|P08110|ENPL_CHICK_Endoplasmin_OS=Gallus_gallus_GN=HSP90B1_PE=1_SV=1|||1e-90	170904-166_2_ORF1	46 kDa	1	3.32	1	DAC	mapped	D8R9C5	9	D8R9C5_SELML	4.72808e-124	tr|D8R9C5|D8R9C5_SELML	170904-166_2_ORF1	sp|Q9SIF2|HS905_ARATH	Q9SIF2	HS905_ARATH	6.00045e-131
Scaffold	5845-939_2_ORF2	210	Cluster of >sp|Q99070|GRP2_SORBI_Glycine-rich_RNA-binding_protein_2_OS=Sorghum_bicolor_GN=GRP2_PE=2_SV=1|||4e-50 (5845-939_2_ORF2)	5845-939_2_ORF2 [6]	23 kDa	1	3.25	1	DAC	mapped	D8SZE2	10	D8SZE2_SELML	1.24289e-40	tr|D8SZE2|D8SZE2_SELML	5845-939_2_ORF2	tr|F4JVC0|F4JVC0_ARATH	F4JVC0	F4JVC0_ARATH	1.25505e-41
Scaffold	291898-73_1_ORF1	626	>sp|Q8MA03|ODPB_CHAGL_Pyruvate_dehydrogenase_E1_component_subunit_beta_OS=Chaetosphaeridium_globosum_GN=pdhB_PE=3_SV=1|||0	291898-73_1_ORF1	45 kDa	1	3.17	1	DAC	mapped	D8SPY9	11	D8SPY9_SELML	0	tr|D8SPY9|D8SPY9_SELML	291898-73_1_ORF1	sp|O64688|ODPB3_ARATH	O64688	ODPB3_ARATH	0
Scaffold	152641-192_2_ORF2	828	>sp|Q946J8|LHP1_ARATH_Chromo_domain-containing_protein_LHP1_OS=Arabidopsis_thaliana_GN=LHP1_PE=1_SV=2|||1e-47	152641-192_2_ORF2 (+1)	59 kDa	1	3.17	1	DAC	notMapped		12				152641-192_2_ORF2	sp|Q946J8|LHP1_ARATH	Q946J8	LHP1_ARATH	1.00311e-43
Scaffold	tr|B9GKJ2|B9GKJ2_POPTR	1049	Heavy metal ATPase OS=Populus trichocarpa GN=POPTRDRAFT_751336 PE=3 SV=1	tr|B9GKJ2|B9GKJ2_POPTR	105 kDa	1	3	1	DAC	notMapped		13				tr|B9GKJ2|B9GKJ2_POPTR	sp|P29514|TBB6_ARATH	P29514	TBB6_ARATH	0
Scaffold	tr|A8JH98|A8JH98_CHLRE	741	Enolase OS=Chlamydomonas reinhardtii GN=PGH1 PE=3 SV=1	tr|A8JH98|A8JH98_CHLRE	52 kDa	1	3	1	DAC	notMapped		14				tr|A8JH98|A8JH98_CHLRE	sp|Q9LZQ9|DEAH2_ARATH	Q9LZQ9	DEAH2_ARATH	0
Scaffold	91319-262_1_ORF2	221	>sp|P61699|SYA_CORDI_Alanine--tRNA_ligase_OS=Corynebacterium_diphtheriae_(strain_ATCC_700971_/_NCTC_13129_/_Biotype_gravis)_GN=alaS_PE=3_SV=1|||3e-06	91319-262_1_ORF2	24 kDa	1	3	1	DAC	notMapped		15				91319-262_1_ORF2	sp|Q9ZQ80|NDRP1_ARATH	Q9ZQ80	NDRP1_ARATH	3.387e-10
Scaffold	63281-318_4_ORF1	12	>sp|P52855|RLA1_MAIZE_60S_acidic_ribosomal_protein_P1_OS=Zea_mays_GN=RPP1A_PE=1_SV=1|||2e-27	63281-318_4_ORF1	9 kDa	1	3	1	DAC	mapped	D8T6I7	16	D8T6I7_SELML	7.79437e-24	tr|D8T6I7|D8T6I7_SELML	63281-318_4_ORF1	tr|Q9FLV1|Q9FLV1_ARATH	Q9FLV1	Q9FLV1_ARATH	2.36329e-27
Scaffold	374761-33_1_ORF1	259	>sp|B2J4A4|GERAS_NOSP7_Germacrene_A_synthase_OS=Nostoc_punctiforme_(strain_ATCC_29133_/_PCC_73102)_GN=Npun_R3832_PE=1_SV=1|||9e-13	374761-33_1_ORF1	26 kDa	1	3	1	DAC	mapped	D8S259	17	D8S259_SELML	2.58511e-10	tr|D8S259|D8S259_SELML	374761-33_1_ORF1	noOrthologue	noOrthologue	noOrthologue	notMapped
Scaffold	263607-90_6_ORF2	639	>sp|Q9LR75|HEM6_ARATH_Coproporphyrinogen-III_oxidase,_chloroplastic_OS=Arabidopsis_thaliana_GN=CPX_PE=1_SV=1|||0	263607-90_6_ORF2 (+1)	46 kDa	1	3	1	DAC	mapped	D8T3V0	18	D8T3V0_SELML	0	tr|D8T3V0|D8T3V0_SELML	263607-90_6_ORF2	sp|Q9LR75|HEM61_ARATH	Q9LR75	HEM61_ARATH	0
Scaffold	22615-526_6_ORF2	130	>sp|Q99070|GRP2_SORBI_Glycine-rich_RNA-binding_protein_2_OS=Sorghum_bicolor_GN=GRP2_PE=2_SV=1|||2e-46	22615-526_6_ORF2	18 kDa	1	3	1	DAC	mapped	D8T0R7	19	D8T0R7_SELML	2.92455e-33	tr|D8T0R7|D8T0R7_SELML	22615-526_6_ORF2	tr|F4JVC0|F4JVC0_ARATH	F4JVC0	F4JVC0_ARATH	2.54734e-41
Scaffold	22319-529_6_ORF2	652	>sp|E1U332|ALL12_OLEEU_Isoflavone_reductase-like_protein_OS=Olea_europaea_PE=1_SV=1|||4e-114	22319-529_6_ORF2	47 kDa	1	3	1	DAC	mapped	D8SSR4	20	D8SSR4_SELML	3.35442e-110	tr|D8SSR4|D8SSR4_SELML	22319-529_6_ORF2	tr|A0A1P8ART1|A0A1P8ART1_ARATH	A0A1P8ART1	A0A1P8ART1_ARATH	3.32086e-114
Scaffold	213367-126_2_ORF2	853	>sp|Q8S9L5|TIG_ARATH_Trigger_factor-like_protein_TIG_OS=Arabidopsis_thaliana_GN=TIG_PE=2_SV=1|||3e-158	213367-126_2_ORF2	61 kDa	1	3	1	DAC	mapped	D8QUI7	21	D8QUI7_SELML	5.17876e-155	tr|D8QUI7|D8QUI7_SELML	213367-126_2_ORF2	sp|Q8S9L5|TIG_ARATH	Q8S9L5	TIG_ARATH	1.38309e-155
Scaffold	179874-156_2_ORF2	725	>sp|P38494|RS1H_BACSU_30S_ribosomal_protein_S1_homolog_OS=Bacillus_subtilis_(strain_168)_GN=ypfD_PE=1_SV=1|||4e-20	179874-156_2_ORF2	51 kDa	1	3	1	DAC	mapped	D8T3V5	22	D8T3V5_SELML	4.88473e-49	tr|D8T3V5|D8T3V5_SELML	179874-156_2_ORF2	tr|F4JMU5|F4JMU5_ARATH	F4JMU5	F4JMU5_ARATH	1.22491e-51
Scaffold	148111-200_1_ORF2	409	>sp|P52597|HNRPF_HUMAN_Heterogeneous_nuclear_ribonucleoprotein_F_OS=Homo_sapiens_GN=HNRNPF_PE=1_SV=3|||2e-36	148111-200_1_ORF2 (+1)	33 kDa	1	3	1	DAC	mapped	D8RZN3	23	D8RZN3_SELML	9.72068e-109	tr|D8RZN3|D8RZN3_SELML	148111-200_1_ORF2	tr|F4JZ11|F4JZ11_ARATH	F4JZ11	F4JZ11_ARATH	1.42436e-89
Scaffold	101879-247_4_ORF2	460	>sp|Q9SAR5|AKR2_ARATH_Ankyrin_repeat_domain-containing_protein_2_OS=Arabidopsis_thaliana_GN=AKR2_PE=1_SV=2|||9e-126	101879-247_4_ORF2	36 kDa	1	3	1	DAC	mapped	D8SJW0	24	D8SJW0_SELML	1.43988e-141	tr|D8SJW0|D8SJW0_SELML	101879-247_4_ORF2	sp|Q29Q26|AKR2B_ARATH	Q29Q26	AKR2B_ARATH	5.91217e-124
Scaffold	tr|E1ZQQ5|E1ZQQ5_CHLVA	561	Fructose-bisphosphate aldolase OS=Chlorella variabilis GN=CHLNCDRAFT_37179 PE=3 SV=1	tr|E1ZQQ5|E1ZQQ5_CHLVA	42 kDa	1	2.81	1	DAC	mapped	D8RHD1	25	D8RHD1_SELML	0	tr|D8RHD1|D8RHD1_SELML	tr|E1ZQQ5|E1ZQQ5_CHLVA	sp|Q944G9|ALFP2_ARATH	Q944G9	ALFP2_ARATH	0
Scaffold	tr|A2T1T4|A2T1T4_ISATI	970	Phenylalanine ammonia-lyase OS=Isatis tinctoria PE=2 SV=1	tr|A2T1T4|A2T1T4_ISATI	79 kDa	1	2.81	1	DAC	mapped	D8SER3	26	D8SER3_SELML	0	tr|D8SER3|D8SER3_SELML	tr|A2T1T4|A2T1T4_ISATI	sp|P35510|PAL1_ARATH	P35510	PAL1_ARATH	0
Scaffold	35199-427_6_ORF2	988	>sp|F4K0E8|ISPG_ARATH_4-hydroxy-3-methylbut-2-en-1-yl_diphosphate_synthase,_chloroplastic_OS=Arabidopsis_thaliana_GN=ISPG_PE=1_SV=1|||0	35199-427_6_ORF2	84 kDa	1	2.81	1	DAC	mapped	D8RQF1	27	D8RQF1_SELML	0	tr|D8RQF1|D8RQF1_SELML	35199-427_6_ORF2	sp|F4K0E8|ISPG_ARATH	F4K0E8	ISPG_ARATH	0
Scaffold	31654-450_3_ORF2	275	>sp|B8IYH2|RS10_DESDA_30S_ribosomal_protein_S10_OS=Desulfovibrio_desulfuricans_(strain_ATCC_27774_/_DSM_6949)_GN=rpsJ_PE=3_SV=1|||5e-06	31654-450_3_ORF2	27 kDa	1	2.81	1	DAC	mapped	D8SHX7	28	D8SHX7_SELML	2.67124e-46	tr|D8SHX7|D8SHX7_SELML	31654-450_3_ORF2	tr|F4IUJ0|F4IUJ0_ARATH	F4IUJ0	F4IUJ0_ARATH	3.22281e-51
Scaffold	164136-174_1_ORF2	28	>sp|P52855|RLA1_MAIZE_60S_acidic_ribosomal_protein_P1_OS=Zea_mays_GN=RPP1A_PE=1_SV=1|||3e-39	164136-174_1_ORF2	12 kDa	1	2.81	1	DAC	mapped	D8T6P9	29	D8T6P9_SELML	6.52878e-36	tr|D8T6P9|D8T6P9_SELML	164136-174_1_ORF2	tr|Q9FLV1|Q9FLV1_ARATH	Q9FLV1	Q9FLV1_ARATH	3.4296e-41
Scaffold	125205-220_6_ORF2	961	>sp|Q9MA55|ACBP4_ARATH_Acyl-CoA-binding_domain-containing_protein_4_OS=Arabidopsis_thaliana_GN=ACBP4_PE=1_SV=1|||0	125205-220_6_ORF2 (+1)	76 kDa	1	2.81	1	DAC	mapped	D8SN17	30	D8SN17_SELML	0	tr|D8SN17|D8SN17_SELML	125205-220_6_ORF2	sp|Q9MA55|ACBP4_ARATH	Q9MA55	ACBP4_ARATH	0
Scaffold	10874-726_5_ORF1	330	Cluster of >sp|Q7VRG3|PGK_BLOFL_Phosphoglycerate_kinase_OS=Blochmannia_floridanus_GN=pgk_PE=3_SV=1|||6e-07 (10874-726_5_ORF1)	10874-726_5_ORF1 [6]	29 kDa	1	2.81	1	DAC	mapped	D8SIV5	31	D8SIV5_SELML	3.78475e-46	tr|D8SIV5|D8SIV5_SELML	10874-726_5_ORF1	sp|Q8LDL0|HHL1_ARATH	Q8LDL0	HHL1_ARATH	4.04912e-48
Scaffold	107416-240_5_ORF1	948	>sp|P42697|DRP1A_ARATH_Dynamin-related_protein_1A_OS=Arabidopsis_thaliana_GN=DRP1A_PE=1_SV=3|||0	107416-240_5_ORF1 (+1)	74 kDa	1	2.81	1	DAC	mapped	D8SVZ5	32	D8SVZ5_SELML	0	tr|D8SVZ5|D8SVZ5_SELML	107416-240_5_ORF1	sp|Q9FNX5|DRP1E_ARATH	Q9FNX5	DRP1E_ARATH	0
Scaffold	10412-739_4_ORF2	724	>sp|O94260|G3BP_SCHPO_Putative_G3BP-like_protein_OS=Schizosaccharomyces_pombe_(strain_972_/_ATCC_24843)_GN=nxt3_PE=1_SV=1|||1e-31	10412-739_4_ORF2	51 kDa	1	2.81	1	DAC	mapped	D8QZ58	33	D8QZ58_SELML	1.91922e-35	tr|D8QZ58|D8QZ58_SELML	10412-739_4_ORF2	tr|Q8VYJ4|Q8VYJ4_ARATH	Q8VYJ4	Q8VYJ4_ARATH	1.51028e-49
Scaffold	tr|A9TXI8|A9TXI8_PHYPA	88	Predicted protein OS=Physcomitrella patens subsp. patens GN=PHYPADRAFT_199261 PE=4 SV=1	tr|A9TXI8|A9TXI8_PHYPA (+1)	17 kDa	1	2.58	1	DAC	notMapped		34				tr|A9TXI8|A9TXI8_PHYPA	noOrthologue	noOrthologue	noOrthologue	notMapped
Scaffold	tr|A9PCN6|A9PCN6_POPTR	33	60S ribosomal protein L36 OS=Populus trichocarpa GN=POPTRDRAFT_713845 PE=3 SV=1	tr|A9PCN6|A9PCN6_POPTR	12 kDa	1	2.58	1	DAC	mapped	D8R598	35	D8R598_SELML	2.10157e-50	tr|D8R598|D8R598_SELML	tr|A9PCN6|A9PCN6_POPTR	sp|O80929|RL361_ARATH	O80929	RL361_ARATH	1.7971e-57
Scaffold	tr|A9NKT9|A9NKT9_PICSI	573	Putative uncharacterized protein OS=Picea sitchensis PE=2 SV=1	tr|A9NKT9|A9NKT9_PICSI	42 kDa	1	2.58	1	DAC	notMapped		36				tr|A9NKT9|A9NKT9_PICSI	sp|Q7DLR9|PSB4_ARATH	Q7DLR9	PSB4_ARATH	8.05928e-140
Scaffold	REV_184400-152_1_ORF1	77	REV_184400-152_1_ORF1	REV_184400-152_1_ORF1	16 kDa	1	2.58	1	DAC	notMapped		37				REV_184400-152_1_ORF1	tr|Q9SKZ0|Q9SKZ0_ARATH	Q9SKZ0	Q9SKZ0_ARATH	4.18317e-48
Scaffold	81315-279_3_ORF2	785	>sp|Q93YZ7|ILVH2_ARATH_Acetolactate_synthase_small_subunit_2,_chloroplastic_OS=Arabidopsis_thaliana_GN=At2g31810_PE=1_SV=1|||0	81315-279_3_ORF2 (+1)	55 kDa	1	2.58	1	DAC	mapped	D8S7U8	38	D8S7U8_SELML	0	tr|D8S7U8|D8S7U8_SELML	81315-279_3_ORF2	sp|Q93YZ7|ILVH2_ARATH	Q93YZ7	ILVH2_ARATH	8.62091e-179
Scaffold	6076-923_5_ORF2	140	>sp|Q8TXU4|FEN_METKA_Flap_endonuclease_1_OS=Methanopyrus_kandleri_(strain_AV19_/_DSM_6324_/_JCM_9639_/_NBRC_100938)_GN=fen_PE=3_SV=1|||4e-07	6076-923_5_ORF2 (+1)	19 kDa	1	2.58	1	DAC	mapped	D8T819	39	D8T819_SELML	9.66582e-53	tr|D8T819|D8T819_SELML	6076-923_5_ORF2	tr|Q9FL37|Q9FL37_ARATH	Q9FL37	Q9FL37_ARATH	5.47585e-38
Scaffold	60318-326_4_ORF2	292	>sp|Q54JK4|CHMP5_DICDI_Charged_multivesicular_body_protein_5_OS=Dictyostelium_discoideum_GN=chmp5_PE=3_SV=1|||7e-72	60318-326_4_ORF2 (+1)	27 kDa	1	2.58	1	DAC	mapped	D8T349	40	D8T349_SELML	4.00548e-127	tr|D8T349|D8T349_SELML	60318-326_4_ORF2	sp|Q9LPN5|VP601_ARATH	Q9LPN5	VP601_ARATH	2.79076e-124
Scaffold	59499-329_2_ORF1	826	>sp|Q925J9|MED1_MOUSE_Mediator_of_RNA_polymerase_II_transcription_subunit_1_OS=Mus_musculus_GN=Med1_PE=1_SV=2|||2e-04	59499-329_2_ORF1	58 kDa	1	2.58	1	DAC	notMapped		41				59499-329_2_ORF1	tr|A2RVW1|A2RVW1_ARATH	A2RVW1	A2RVW1_ARATH	4.31175e-60
Scaffold	345798-45_1_ORF2	517	>sp|Q39172|P1_ARATH_NADP-dependent_alkenal_double_bond_reductase_P1_OS=Arabidopsis_thaliana_GN=P1_PE=1_SV=1|||2e-144	345798-45_1_ORF2 (+2)	39 kDa	1	2.58	1	DAC	mapped	D8R8J3	42	D8R8J3_SELML	8.52229e-95	tr|D8R8J3|D8R8J3_SELML	345798-45_1_ORF2	sp|Q39172|AER_ARATH	Q39172	AER_ARATH	1.60196e-141
Scaffold	306537-65_4_ORF1	141	>sp|O50008|METE_ARATH_5-methyltetrahydropteroyltriglutamate--homocysteine_methyltransferase_OS=Arabidopsis_thaliana_GN=CIMS_PE=1_SV=1|||1e-106	306537-65_4_ORF1	19 kDa	1	2.58	1	DAC	mapped	D8RFL9	43	D8RFL9_SELML	1.54568e-102	tr|D8RFL9|D8RFL9_SELML	306537-65_4_ORF1	sp|O50008|METE1_ARATH	O50008	METE1_ARATH	7.52131e-104
Scaffold	280023-80_1_ORF1	953	no_acceptable_match|||NA	280023-80_1_ORF1	75 kDa	1	2.58	1	DAC	mapped	D8SHQ0	44	D8SHQ0_SELML	0	tr|D8SHQ0|D8SHQ0_SELML	280023-80_1_ORF1	sp|Q9SS45|PAL4_ARATH	Q9SS45	PAL4_ARATH	0
Scaffold	275958-82_2_ORF1	646	>sp|P23444|H1_MAIZE_Histone_H1_OS=Zea_mays_PE=2_SV=2|||2e-28	275958-82_2_ORF1 (+4)	46 kDa	1	2.58	1	DAC	mapped	D8QVV9	45	D8QVV9_SELML	8.64126e-21	tr|D8QVV9|D8QVV9_SELML	275958-82_2_ORF1	tr|F4INW2|F4INW2_ARATH	F4INW2	F4INW2_ARATH	4.61845e-21
Scaffold	214217-125_4_ORF2	631	>sp|Q28F29|ZN326_XENTR_DBIRD_complex_subunit_ZNF326_OS=Xenopus_tropicalis_GN=znf326_PE=2_SV=1|||4e-06	214217-125_4_ORF2 (+1)	46 kDa	1	2.58	1	DAC	mapped	D8SYV1	46	D8SYV1_SELML	1.02826e-09	tr|D8SYV1|D8SYV1_SELML	214217-125_4_ORF2	sp|O23593|RGGB_ARATH	O23593	RGGB_ARATH	2.50959e-26
Scaffold	1847-1440_4_ORF2	481	>sp|Q6G1I3|IF3_BARQU_Translation_initiation_factor_IF-3_OS=Bartonella_quintana_(strain_Toulouse)_GN=infC_PE=3_SV=1|||2e-42	1847-1440_4_ORF2	36 kDa	1	2.58	1	DAC	mapped	D8R2N3	47	D8R2N3_SELML	1.91047e-44	tr|D8R2N3|D8R2N3_SELML	1847-1440_4_ORF2	sp|Q94B52|IF34_ARATH	Q94B52	IF34_ARATH	6.46293e-45
Scaffold	173702-163_1_ORF1	894	Cluster of >sp|P55964|KPYG_RICCO_Pyruvate_kinase_isozyme_G,_chloroplastic_(Fragment)_OS=Ricinus_communis_PE=2_SV=1|||0 (173702-163_1_ORF1)	173702-163_1_ORF1 [10]	65 kDa	1	2.58	1	DAC	notMapped		48				173702-163_1_ORF1	sp|Q9LZF6|CD48E_ARATH	Q9LZF6	CD48E_ARATH	4.56782e-79
Scaffold	163057-176_3_ORF2	29	>sp|P52855|RLA1_MAIZE_60S_acidic_ribosomal_protein_P1_OS=Zea_mays_GN=RPP1A_PE=1_SV=1|||3e-39	163057-176_3_ORF2	12 kDa	1	2.58	1	DAC	mapped	D8T6P9	49	D8T6P9_SELML	6.2493e-36	tr|D8T6P9|D8T6P9_SELML	163057-176_3_ORF2	tr|Q9FLV1|Q9FLV1_ARATH	Q9FLV1	Q9FLV1_ARATH	8.41639e-41
Scaffold	140398-206_5_ORF2	656	>sp|P38494|RS1H_BACSU_30S_ribosomal_protein_S1_homolog_OS=Bacillus_subtilis_(strain_168)_GN=ypfD_PE=1_SV=1|||1e-22	140398-206_5_ORF2	47 kDa	1	2.58	1	DAC	mapped	D8T3V5	50	D8T3V5_SELML	8.14448e-45	tr|D8T3V5|D8T3V5_SELML	140398-206_5_ORF2	tr|F4JMU5|F4JMU5_ARATH	F4JMU5	F4JMU5_ARATH	1.35208e-61
Scaffold	105046-243_5_ORF1	760	>sp|B0SH16|RIMP_LEPBA_Ribosome_maturation_factor_RimP_OS=Leptospira_biflexa_serovar_Patoc_(strain_Patoc_1_/_Ames)_GN=rimP_PE=3_SV=1|||2e-10	105046-243_5_ORF1 (+1)	53 kDa	1	2.58	1	DAC	notMapped		51				105046-243_5_ORF1	tr|Q56XE2|Q56XE2_ARATH	Q56XE2	Q56XE2_ARATH	1.03563e-50
Scaffold	153996-190_2_ORF2	52	>sp|Q9M2F1|RS272_ARATH_40S_ribosomal_protein_S27-2_OS=Arabidopsis_thaliana_GN=RPS27B_PE=2_SV=2|||4e-57	153996-190_2_ORF2 (+4)	14 kDa	1	2.46	1	DAC	mapped	D8QQW3	52	D8QQW3_SELML	8.72265e-52	tr|D8QQW3|D8QQW3_SELML	153996-190_2_ORF2	sp|Q9M2F1|RS272_ARATH	Q9M2F1	RS272_ARATH	3.08711e-53
Scaffold	93583-259_6_ORF1	32	>sp|Q02028|HSP7S_PEA_Stromal_70_kDa_heat_shock-related_protein,_chloroplastic_OS=Pisum_sativum_GN=HSP70_PE=2_SV=1|||4e-46	93583-259_6_ORF1	12 kDa	1	2.42	1	DAC	mapped	D8T059	53	D8T059_SELML	5.01944e-33	tr|D8T059|D8T059_SELML	93583-259_6_ORF1	sp|Q9LTX9|HSP7G_ARATH	Q9LTX9	HSP7G_ARATH	8.49102e-40
Scaffold	tr|E4MX35|E4MX35_THEHA	346	mRNA, clone: RTFL01-10-F15 OS=Thellungiella halophila PE=2 SV=1	tr|E4MX35|E4MX35_THEHA	30 kDa	1	2.32	1	DAC	mapped	D8S9E5	54	D8S9E5_SELML	5.13421e-114	tr|D8S9E5|D8S9E5_SELML	tr|E4MX35|E4MX35_THEHA	sp|Q8VZN9|P2C11_ARATH	Q8VZN9	P2C11_ARATH	0
Scaffold	tr|D7L198|D7L198_ARALL	991	Putative uncharacterized protein OS=Arabidopsis lyrata subsp. lyrata GN=ARALYDRAFT_477628 PE=3 SV=1	tr|D7L198|D7L198_ARALL	85 kDa	1	2.32	1	DAC	mapped	D8TCH7	55	D8TCH7_SELML	0	tr|D8TCH7|D8TCH7_SELML	tr|D7L198|D7L198_ARALL	sp|Q9SRV5|METE2_ARATH	Q9SRV5	METE2_ARATH	0
Scaffold	tr|B9MW67|B9MW67_POPTR	590	Predicted protein OS=Populus trichocarpa GN=POPTRDRAFT_740652 PE=3 SV=1	tr|B9MW67|B9MW67_POPTR	43 kDa	1	2.32	1	DAC	mapped	D8SKI8	56	D8SKI8_SELML	0	tr|D8SKI8|D8SKI8_SELML	tr|B9MW67|B9MW67_POPTR	sp|Q9C8P0|ODP25_ARATH	Q9C8P0	ODP25_ARATH	0
Scaffold	tr|A9PF34|A9PF34_POPTR	610	Aminomethyltransferase OS=Populus trichocarpa PE=2 SV=1	tr|A9PF34|A9PF34_POPTR (+4)	44 kDa	1	2.32	1	DAC	notMapped		57				tr|A9PF34|A9PF34_POPTR	sp|O48646|GPX6_ARATH	O48646	GPX6_ARATH	3.71737e-107
Scaffold	98107-252_4_ORF2	574	>sp|O34769|PKSB_BACSU_Probable_polyketide_biosynthesis_zinc-dependent_hydrolase_PksB_OS=Bacillus_subtilis_(strain_168)_GN=pksB_PE=1_SV=1|||2e-27	98107-252_4_ORF2 (+1)	42 kDa	1	2.32	1	DAC	mapped	D8T150	58	D8T150_SELML	0	tr|D8T150|D8T150_SELML	98107-252_4_ORF2	sp|Q9C8L4|ETHE1_ARATH	Q9C8L4	ETHE1_ARATH	2.7271e-15
Scaffold	9434-771_1_ORF2	576	>sp|Q9SUT5|SGT1B_ARATH_Protein_SGT1_homolog_B_OS=Arabidopsis_thaliana_GN=SGT1B_PE=1_SV=1|||8e-121	9434-771_1_ORF2	42 kDa	1	2.32	1	DAC	mapped	D8RUF6	59	D8RUF6_SELML	1.68712e-100	tr|D8RUF6|D8RUF6_SELML	9434-771_1_ORF2	sp|Q9SUT5|SGT1B_ARATH	Q9SUT5	SGT1B_ARATH	8.73566e-118
Scaffold	91676-262_2_ORF2	898	>sp|P29976|AROF_ARATH_Phospho-2-dehydro-3-deoxyheptonate_aldolase_1,_chloroplastic_OS=Arabidopsis_thaliana_GN=DHS1_PE=2_SV=2|||0	91676-262_2_ORF2	66 kDa	1	2.32	1	DAC	mapped	D8RTL7	60	D8RTL7_SELML	0	tr|D8RTL7|D8RTL7_SELML	91676-262_2_ORF2	tr|Q9SK84|Q9SK84_ARATH	Q9SK84	Q9SK84_ARATH	0
Scaffold	75169-291_4_ORF2	959	>sp|P61286|PABP1_BOVIN_Polyadenylate-binding_protein_1_OS=Bos_taurus_GN=PABPC1_PE=2_SV=1|||0	75169-291_4_ORF2	76 kDa	1	2.32	1	DAC	mapped	D8QQ78	61	D8QQ78_SELML	0	tr|D8QQ78|D8QQ78_SELML	75169-291_4_ORF2	sp|Q9FXA2|PABP8_ARATH	Q9FXA2	PABP8_ARATH	0
Scaffold	69164-303_6_ORF1	48	>sp|Q9CR41|HYPK_MOUSE_Huntingtin-interacting_protein_K_OS=Mus_musculus_GN=Hypk_PE=2_SV=2|||2e-19	69164-303_6_ORF1 (+1)	13 kDa	1	2.32	1	DAC	mapped	D8SSK8	62	D8SSK8_SELML	7.67795e-49	tr|D8SSK8|D8SSK8_SELML	69164-303_6_ORF1	tr|Q9C901|Q9C901_ARATH	Q9C901	Q9C901_ARATH	1.09323e-44
Scaffold	383335-29_2_ORF2	773	Cluster of >sp|Q9LR30|GGT1_ARATH_Glutamate--glyoxylate_aminotransferase_1_OS=Arabidopsis_thaliana_GN=GGAT1_PE=1_SV=1|||0 (383335-29_2_ORF2)	383335-29_2_ORF2 [2]	54 kDa	1	2.32	1	DAC	mapped	D8RBH6	63	D8RBH6_SELML	0	tr|D8RBH6|D8RBH6_SELML	383335-29_2_ORF2	sp|Q9LR30|GGT1_ARATH	Q9LR30	GGT1_ARATH	0
Scaffold	34432-432_6_ORF2	537	>sp|Q86IG2|Y2682_DICDI_Uncharacterized_protein_DDB_G0272682_OS=Dictyostelium_discoideum_GN=DDB_G0272682_PE=4_SV=1|||2e-05	34432-432_6_ORF2 (+3)	40 kDa	1	2.32	1	DAC	notMapped		64				34432-432_6_ORF2	sp|Q84TH6|DIR23_ARATH	Q84TH6	DIR23_ARATH	4.35294e-12
Scaffold	317419-59_6_ORF2	737	>sp|Q94CD1|HHT1_ARATH_Omega-hydroxypalmitate_O-feruloyl_transferase_OS=Arabidopsis_thaliana_GN=HHT1_PE=1_SV=1|||0	317419-59_6_ORF2 (+1)	52 kDa	1	2.32	1	DAC	mapped	D8RQA7	65	D8RQA7_SELML	3.18839e-178	tr|D8RQA7|D8RQA7_SELML	317419-59_6_ORF2	sp|Q94CD1|HHT1_ARATH	Q94CD1	HHT1_ARATH	0
Scaffold	27623-480_2_ORF2	82	>sp|Q8LFQ6|GRXC4_ARATH_Glutaredoxin-C4_OS=Arabidopsis_thaliana_GN=GRXC4_PE=2_SV=2|||2e-55	27623-480_2_ORF2	16 kDa	1	2.32	1	DAC	mapped	D8RV58	66	D8RV58_SELML	4.05049e-45	tr|D8RV58|D8RV58_SELML	27623-480_2_ORF2	sp|Q8LFQ6|GRXC4_ARATH	Q8LFQ6	GRXC4_ARATH	1.00162e-51
Scaffold	254886-96_1_ORF2	435	>sp|Q9XI36|MBD10_ARATH_Methyl-CpG-binding_domain-containing_protein_10_OS=Arabidopsis_thaliana_GN=MBD10_PE=1_SV=1|||3e-29	254886-96_1_ORF2 (+1)	34 kDa	1	2.32	1	DAC	mapped	D8QR39	67	D8QR39_SELML	1.99812e-28	tr|D8QR39|D8QR39_SELML	254886-96_1_ORF2	sp|Q9XI36|MBD10_ARATH	Q9XI36	MBD10_ARATH	1.22143e-24
Scaffold	2376-1312_3_ORF1	494	>sp|Q9S834|CLPP5_ARATH_ATP-dependent_Clp_protease_proteolytic_subunit_5,_chloroplastic_OS=Arabidopsis_thaliana_GN=CLPP5_PE=1_SV=1|||5e-147	2376-1312_3_ORF1 (+1)	38 kDa	1	2.32	1	DAC	mapped	D8QXZ9	68	D8QXZ9_SELML	8.29715e-149	tr|D8QXZ9|D8QXZ9_SELML	2376-1312_3_ORF1	sp|Q9S834|CLPP5_ARATH	Q9S834	CLPP5_ARATH	4.43696e-144
Scaffold	226384-116_3_ORF2	706	>sp|Q8LSQ2|SR43C_ORYSJ_Probable_signal_recognition_particle_43_kDa_protein,_chloroplastic_OS=Oryza_sativa_subsp._japonica_GN=Os03g0131900_PE=2_SV=1|||6e-102	226384-116_3_ORF2	50 kDa	1	2.32	1	DAC	mapped	D8T2U0	69	D8T2U0_SELML	8.414e-126	tr|D8T2U0|D8T2U0_SELML	226384-116_3_ORF2	sp|O22265|SR43C_ARATH	O22265	SR43C_ARATH	4.61039e-98
Scaffold	217787-123_1_ORF2	700	>sp|Q8H7F6|GRS16_ARATH_Monothiol_glutaredoxin-S16,_chloroplastic_OS=Arabidopsis_thaliana_GN=GRXS16_PE=2_SV=2|||3e-10	217787-123_1_ORF2	49 kDa	1	2.32	1	DAC	mapped	D8RFZ0	70	D8RFZ0_SELML	1.15021e-117	tr|D8RFZ0|D8RFZ0_SELML	217787-123_1_ORF2	sp|Q8H7F6|GRS16_ARATH	Q8H7F6	GRS16_ARATH	1.53114e-05
Scaffold	210663-128_2_ORF2	532	>sp|O95433|AHSA1_HUMAN_Activator_of_90_kDa_heat_shock_protein_ATPase_homolog_1_OS=Homo_sapiens_GN=AHSA1_PE=1_SV=1|||2e-58	210663-128_2_ORF2 (+1)	40 kDa	1	2.32	1	DAC	mapped	D8S738	71	D8S738_SELML	0	tr|D8S738|D8S738_SELML	210663-128_2_ORF2	tr|Q9LHL7|Q9LHL7_ARATH	Q9LHL7	Q9LHL7_ARATH	3.81323e-151
Scaffold	205951-132_1_ORF2	1068	>sp|O49160|EIF3C_ARATH_Eukaryotic_translation_initiation_factor_3_subunit_C_OS=Arabidopsis_thaliana_GN=TIF3C1_PE=1_SV=2|||0	205951-132_1_ORF2 (+3)	113 kDa	1	2.32	1	DAC	mapped	D8R7V6	72	D8R7V6_SELML	0	tr|D8R7V6|D8R7V6_SELML	205951-132_1_ORF2	sp|O49160|EIF3C_ARATH	O49160	EIF3C_ARATH	0
Scaffold	200714-137_2_ORF2	843	>sp|Q3T084|TCPW_BOVIN_T-complex_protein_1_subunit_zeta-2_OS=Bos_taurus_GN=CCT6B_PE=2_SV=3|||0	200714-137_2_ORF2	60 kDa	1	2.32	1	DAC	mapped	D8T584	73	D8T584_SELML	0	tr|D8T584|D8T584_SELML	200714-137_2_ORF2	sp|Q9M888|TCPZA_ARATH	Q9M888	TCPZA_ARATH	0
Scaffold	174424-162_2_ORF2	1075	>sp|Q9SHI1|IF2C_ARATH_Translation_initiation_factor_IF-2,_chloroplastic_OS=Arabidopsis_thaliana_GN=At1g17220_PE=2_SV=2|||0	174424-162_2_ORF2	117 kDa	1	2.32	1	DAC	mapped	D8RNT4	74	D8RNT4_SELML	0	tr|D8RNT4|D8RNT4_SELML	174424-162_2_ORF2	sp|Q9SHI1|IF2C_ARATH	Q9SHI1	IF2C_ARATH	0
Scaffold	166554-171_3_ORF1	1071	Cluster of >sp|O96935|AMP1_PLAFQ_M1_family_aminopeptidase_OS=Plasmodium_falciparum_(isolate_FcB1_/_Columbia)_PE=1_SV=2|||0 (166554-171_3_ORF1)	166554-171_3_ORF1 [7]	115 kDa	1	2.32	1	DAC	mapped	D8RAE3	75	D8RAE3_SELML	0	tr|D8RAE3|D8RAE3_SELML	166554-171_3_ORF1	tr|F4I3R1|F4I3R1_ARATH	F4I3R1	F4I3R1_ARATH	0
Scaffold	150831-195_3_ORF2	958	>sp|O07631|TYPA_BACSU_GTP-binding_protein_TypA/BipA_homolog_OS=Bacillus_subtilis_(strain_168)_GN=typA_PE=3_SV=1|||0	150831-195_3_ORF2 (+1)	76 kDa	1	2.32	1	DAC	mapped	D8RC44	76	D8RC44_SELML	0	tr|D8RC44|D8RC44_SELML	150831-195_3_ORF2	sp|F4K410|SVR3_ARATH	F4K410	SVR3_ARATH	0
Scaffold	121915-223_2_ORF2	844	no_acceptable_match|||NA	121915-223_2_ORF2	60 kDa	1	2.32	1	DAC	mapped	D8QUD3	77	D8QUD3_SELML	0	tr|D8QUD3|D8QUD3_SELML	121915-223_2_ORF2	sp|P42770|GSHRP_ARATH	P42770	GSHRP_ARATH	0
Scaffold	112593-234_6_ORF2	1090	>sp|Q8L5Y6|CAND1_ARATH_Cullin-associated_NEDD8-dissociated_protein_1_OS=Arabidopsis_thaliana_GN=CAND1_PE=1_SV=1|||0	112593-234_6_ORF2	137 kDa	1	2.32	1	DAC	mapped	D8QSE9	78	D8QSE9_SELML	0	tr|D8QSE9|D8QSE9_SELML	112593-234_6_ORF2	sp|Q8L5Y6|CAND1_ARATH	Q8L5Y6	CAND1_ARATH	0
Scaffold	11251-715_6_ORF1	252	>sp|P42761|GSTFA_ARATH_Glutathione_S-transferase_F10_OS=Arabidopsis_thaliana_GN=GSTF10_PE=1_SV=3|||4e-70	11251-715_6_ORF1	26 kDa	1	2.32	1	DAC	mapped	D8R0M0	79	D8R0M0_SELML	1.29517e-77	tr|D8R0M0|D8R0M0_SELML	11251-715_6_ORF1	sp|P42761|GSTFA_ARATH	P42761	GSTFA_ARATH	1.15582e-66
Scaffold	102286-246_3_ORF2	304	>sp|Q608L4|GLGA1_METCA_Glycogen_synthase_1_OS=Methylococcus_capsulatus_(strain_ATCC_33009_/_NCIMB_11132_/_Bath)_GN=glgA1_PE=3_SV=1|||8e-06	102286-246_3_ORF2	28 kDa	1	2.32	1	DAC	mapped	D8SIF6	80	D8SIF6_SELML	5.93634e-12	tr|D8SIF6|D8SIF6_SELML	102286-246_3_ORF2	tr|O23157|O23157_ARATH	O23157	O23157_ARATH	4.92172e-18
Scaffold	55257-341_1_ORF2	466	>sp|P41095|RLA0_ORYSJ_60S_acidic_ribosomal_protein_P0_OS=Oryza_sativa_subsp._japonica_GN=Os08g0130500_PE=1_SV=3|||2e-170	55257-341_1_ORF2	36 kDa	1	2.22	1	DAC	mapped	D8SKL7	81	D8SKL7_SELML	1.50961e-172	tr|D8SKL7|D8SKL7_SELML	55257-341_1_ORF2	sp|O04204|RLA01_ARATH	O04204	RLA01_ARATH	7.24369e-166
Scaffold	151710-194_2_ORF2	441	Cluster of >sp|P48496|TPIC_SPIOL_Triosephosphate_isomerase,_chloroplastic_OS=Spinacia_oleracea_GN=TPIP1_PE=1_SV=1|||2e-160 (151710-194_2_ORF2)	151710-194_2_ORF2 [4]	34 kDa	1	2.22	1	DAC	mapped	D8SSS6	82	D8SSS6_SELML	2.64877e-143	tr|D8SSS6|D8SSS6_SELML	151710-194_2_ORF2	sp|Q9SKP6|TPIC_ARATH	Q9SKP6	TPIC_ARATH	1.37781e-154
Scaffold	tr|A1XJ44|A1XJ44_GOSHI	78	Cluster of Actin depolymerizing factor 7 OS=Gossypium hirsutum GN=ADF7 PE=2 SV=1 (tr|A1XJ44|A1XJ44_GOSHI)	tr|A1XJ44|A1XJ44_GOSHI [6]	16 kDa	1	2.2	1	DAC	mapped	D8REJ7	83	D8REJ7_SELML	6.78392e-73	tr|D8REJ7|D8REJ7_SELML	tr|A1XJ44|A1XJ44_GOSHI	sp|Q9LQ81|ADF10_ARATH	Q9LQ81	ADF10_ARATH	1.85957e-81
Scaffold	tr|C1E856|C1E856_MICSR	464	Predicted protein OS=Micromonas sp. (strain RCC299 / NOUM17) GN=MICPUN_94482 PE=4 SV=1	tr|C1E856|C1E856_MICSR	36 kDa	1	2.17	1	DAC	mapped	D8R8P3	84	D8R8P3_SELML	2.64778e-176	tr|D8R8P3|D8R8P3_SELML	tr|C1E856|C1E856_MICSR	sp|Q9C4Z6|GPLPB_ARATH	Q9C4Z6	GPLPB_ARATH	1.06372e-165
Scaffold	tr|A7YAU9|A7YAU9_PINTA	1030	GRP94 OS=Pinus taeda PE=2 SV=1	tr|A7YAU9|A7YAU9_PINTA	95 kDa	1	2.17	1	DAC	mapped	D8RF85	85	D8RF85_SELML	0	tr|D8RF85|D8RF85_SELML	tr|A7YAU9|A7YAU9_PINTA	tr|F4JQ55|F4JQ55_ARATH	F4JQ55	F4JQ55_ARATH	0
Scaffold	4894-1005_6_ORF1	815	>sp|P48809|RB27C_DROME_Heterogeneous_nuclear_ribonucleoprotein_27C_OS=Drosophila_melanogaster_GN=Hrb27C_PE=1_SV=2|||5e-56	4894-1005_6_ORF1 (+1)	58 kDa	1	2.17	1	DAC	mapped	D8RC63	86	D8RC63_SELML	1.04331e-68	tr|D8RC63|D8RC63_SELML	4894-1005_6_ORF1	tr|Q9LHL2|Q9LHL2_ARATH	Q9LHL2	Q9LHL2_ARATH	3.945e-68
Scaffold	389287-27_5_ORF2	402	>sp|P93014|RR5_ARATH_30S_ribosomal_protein_S5,_chloroplastic_OS=Arabidopsis_thaliana_GN=rps5_PE=1_SV=1|||3e-92	389287-27_5_ORF2 (+1)	33 kDa	1	2.17	1	DAC	mapped	D8QUH9	87	D8QUH9_SELML	4.55797e-18	tr|D8QUH9|D8QUH9_SELML	389287-27_5_ORF2	sp|P93014|RR5_ARATH	P93014	RR5_ARATH	4.86992e-89
Scaffold	148908-199_2_ORF2	31	>sp|P27484|GRP2_NICSY_Glycine-rich_protein_2_OS=Nicotiana_sylvestris_GN=GRP-2_PE=2_SV=1|||7e-37	148908-199_2_ORF2	12 kDa	1	2.17	1	DAC	mapped	D8TDR7	88	D8TDR7_SELML	4.22757e-40	tr|D8TDR7|D8TDR7_SELML	148908-199_2_ORF2	tr|A0A1P8B8F3|A0A1P8B8F3_ARATH	A0A1P8B8F3	A0A1P8B8F3_ARATH	2.89697e-31
Scaffold	133309-212_3_ORF2	987	Cluster of >sp|Q8L7S8|RH3_ARATH_DEAD-box_ATP-dependent_RNA_helicase_3,_chloroplastic_OS=Arabidopsis_thaliana_GN=RH3_PE=1_SV=2|||0 (133309-212_3_ORF2)	133309-212_3_ORF2 [8]	84 kDa	1	2.13	1	DAC	mapped	D8RY10	89	D8RY10_SELML	0	tr|D8RY10|D8RY10_SELML	133309-212_3_ORF2	sp|Q8L7S8|RH3_ARATH	Q8L7S8	RH3_ARATH	0
Scaffold	59707-328_6_ORF2	318	>sp|O82528|RL15_PETHY_60S_ribosomal_protein_L15_OS=Petunia_hybrida_GN=RPL15_PE=2_SV=1|||1e-130	59707-328_6_ORF2	29 kDa	1	2.1	1	DAC	mapped	D8QTX2	90	D8QTX2_SELML	7.7797e-124	tr|D8QTX2|D8QTX2_SELML	59707-328_6_ORF2	sp|O23515|RL151_ARATH	O23515	RL151_ARATH	8.74341e-114
Scaffold	tr|Q84SU2|Q84SU2_ORYSJ	1095	Retrotransposon protein, putative, unclassified OS=Oryza sativa subsp. japonica GN=LOC_Os03g45050 PE=4 SV=1	tr|Q84SU2|Q84SU2_ORYSJ	145 kDa		2			notMapped		91				tr|Q84SU2|Q84SU2_ORYSJ	sp|Q9C9W5|HPR1_ARATH	Q9C9W5	HPR1_ARATH	0
Scaffold	tr|Q5YBD0|Q5YBD0_HELSJ	465	Plastid clpB (Fragment) OS=Helicosporidium sp. subsp. Simulium jonesii PE=4 SV=1	tr|Q5YBD0|Q5YBD0_HELSJ	36 kDa		2			mapped	D8T035	92	D8T035_SELML	4.37614e-158	tr|D8T035|D8T035_SELML	tr|Q5YBD0|Q5YBD0_HELSJ	sp|Q9LF37|CLPB3_ARATH	Q9LF37	CLPB3_ARATH	1.98754e-165
Scaffold	tr|Q018L4|Q018L4_OSTTA	66	RL10A_CHLRE 60S ribosomal protein L10a (ISS) (Fragment) OS=Ostreococcus tauri GN=Ot05g04060 PE=4 SV=1	tr|Q018L4|Q018L4_OSTTA	15 kDa		2			mapped	D8QZ46	93	D8QZ46_SELML	3.28383e-20	tr|D8QZ46|D8QZ46_SELML	tr|Q018L4|Q018L4_OSTTA	sp|P59230|R10A2_ARATH	P59230	R10A2_ARATH	9.29373e-21
Scaffold	tr|G5DGD2|G5DGD2_SOLLC	113	Class I small heat shock protein 20.1 OS=Solanum lycopersicum GN=Sl20.1shsp PE=3 SV=1	tr|G5DGD2|G5DGD2_SOLLC	18 kDa		2			notMapped		94				tr|G5DGD2|G5DGD2_SOLLC	sp|O03986|HS904_ARATH	O03986	HS904_ARATH	0
Scaffold	tr|E0CV68|E0CV68_VITVI	1053	Putative uncharacterized protein OS=Vitis vinifera GN=VIT_16s0098g01630 PE=4 SV=1	tr|E0CV68|E0CV68_VITVI	106 kDa		2			mapped	D8STL4	95	D8STL4_SELML	0	tr|D8STL4|D8STL4_SELML	tr|E0CV68|E0CV68_VITVI	sp|Q9FJD4|IMB1_ARATH	Q9FJD4	IMB1_ARATH	0
Scaffold	tr|D5A852|D5A852_PICSI	617	Aminomethyltransferase OS=Picea sitchensis PE=2 SV=1	tr|D5A852|D5A852_PICSI	45 kDa		2			mapped	D8T8R4	96	D8T8R4_SELML	0	tr|D8T8R4|D8T8R4_SELML	tr|D5A852|D5A852_PICSI	tr|A0A2H1ZEA9|A0A2H1ZEA9_ARATH	A0A2H1ZEA9	A0A2H1ZEA9_ARATH	0
Scaffold	tr|A9YT54|A9YT54_SUASA	955	Tyrosine phosphorylated protein A OS=Suaeda salsa GN=TypA PE=2 SV=1	tr|A9YT54|A9YT54_SUASA (+3)	75 kDa		2			notMapped		97				tr|A9YT54|A9YT54_SUASA	noOrthologue	noOrthologue	noOrthologue	notMapped
Scaffold	tr|A9TLH0|A9TLH0_PHYPA	30	Predicted protein OS=Physcomitrella patens subsp. patens GN=PHYPADRAFT_196224 PE=4 SV=1	tr|A9TLH0|A9TLH0_PHYPA	12 kDa		2			notMapped		98				tr|A9TLH0|A9TLH0_PHYPA	sp|P42731|PABP2_ARATH	P42731	PABP2_ARATH	0
Scaffold	sp|P18212|PSBP2_TOBAC	311	Oxygen-evolving enhancer protein 2-2, chloroplastic OS=Nicotiana tabacum GN=PSBP2 PE=1 SV=2	sp|P18212|PSBP2_TOBAC (+3)	29 kDa		2			notMapped		99				sp|P18212|PSBP2_TOBAC	sp|P29514|TBB6_ARATH	P29514	TBB6_ARATH	0
Scaffold	rr|REV_C1E9L2|REV_C1E9L2_MICSR	1124	Predicted protein OS=Micromonas sp. (strain RCC299 / NOUM17) GN=MICPUN_59761 PE=4 SV=1	rr|REV_C1E9L2|REV_C1E9L2_MICSR	472 kDa		2			notMapped		100				rr|REV_C1E9L2|REV_C1E9L2_MICSR	tr|Q9SKZ0|Q9SKZ0_ARATH	Q9SKZ0	Q9SKZ0_ARATH	4.18317e-48
Scaffold	rr|REV_B4FMI4|REV_B4FMI4_MAIZE	731	Putative uncharacterized protein OS=Zea mays PE=2 SV=1	rr|REV_B4FMI4|REV_B4FMI4_MAIZE	51 kDa		2			notMapped		101				rr|REV_B4FMI4|REV_B4FMI4_MAIZE	tr|Q9SKZ0|Q9SKZ0_ARATH	Q9SKZ0	Q9SKZ0_ARATH	4.18317e-48
Scaffold	62277-321_4_ORF2	1010	>sp|Q9CAN0|PPR99_ARATH_Pentatricopeptide_repeat-containing_protein_At1g63130,_mitochondrial_OS=Arabidopsis_thaliana_GN=At1g63130_PE=2_SV=1|||1e-36	62277-321_4_ORF2	90 kDa	1	2	1	DAC	mapped	D8TCP3	102	D8TCP3_SELML	1.87091e-96	tr|D8TCP3|D8TCP3_SELML	62277-321_4_ORF2	sp|Q9CAN0|PPR99_ARATH	Q9CAN0	PPR99_ARATH	3.09193e-32
Scaffold	61251-323_1_ORF2	369	>sp|P24937|CAP6_ADE05_Pre-protein_VI_OS=Human_adenovirus_C_serotype_5_GN=L3_PE=1_SV=1|||1e-06	61251-323_1_ORF2 (+2)	31 kDa		2			mapped	D8QR48	103	D8QR48_SELML	9.99712e-13	tr|D8QR48|D8QR48_SELML	61251-323_1_ORF2	sp|Q8VZ20|ASR3_ARATH	Q8VZ20	ASR3_ARATH	4.17023e-14
Scaffold	60351-326_2_ORF2	945	>sp|P36444|MAOC_FLAPR_NADP-dependent_malic_enzyme,_chloroplastic_OS=Flaveria_pringlei_GN=MODA_PE=2_SV=1|||0	60351-326_2_ORF2	73 kDa		2			mapped	D8T2K2	104	D8T2K2_SELML	0	tr|D8T2K2|D8T2K2_SELML	60351-326_2_ORF2	sp|Q9XGZ0|MAOP3_ARATH	Q9XGZ0	MAOP3_ARATH	0
Scaffold	59409-329_5_ORF2	230	Cluster of >sp|A2YDY2|RL11_ORYSI_60S_ribosomal_protein_L11_OS=Oryza_sativa_subsp._indica_GN=RPL11_PE=2_SV=2|||6e-126 (59409-329_5_ORF2)	59409-329_5_ORF2 [12]	24 kDa	1	2	1	DAC	mapped	D8SCT8	105	D8SCT8_SELML	2.63233e-115	tr|D8SCT8|D8SCT8_SELML	59409-329_5_ORF2	sp|P42794|RL112_ARATH	P42794	RL112_ARATH	1.06408e-120
Scaffold	59089-329_1_ORF1	1061	>sp|Q9FFC7|SYAP_ARATH_Probable_alanine--tRNA_ligase,_chloroplastic_OS=Arabidopsis_thaliana_GN=EMB86_PE=1_SV=2|||0	59089-329_1_ORF1	110 kDa		2			mapped	D8TCM1	106	D8TCM1_SELML	0	tr|D8TCM1|D8TCM1_SELML	59089-329_1_ORF1	sp|Q9FFC7|SYAP_ARATH	Q9FFC7	SYAP_ARATH	0
Scaffold	388574-27_3_ORF2	695	>sp|Q32P51|RA1L2_HUMAN_Heterogeneous_nuclear_ribonucleoprotein_A1-like_2_OS=Homo_sapiens_GN=HNRNPA1L2_PE=2_SV=2|||2e-35	388574-27_3_ORF2	49 kDa		2			mapped	D8QR49	107	D8QR49_SELML	4.40465e-129	tr|D8QR49|D8QR49_SELML	388574-27_3_ORF2	tr|Q94AC3|Q94AC3_ARATH	Q94AC3	Q94AC3_ARATH	3.00838e-115
Scaffold	37625-414_1_ORF2	298	>sp|B4J4E7|EIF3J_DROGR_Eukaryotic_translation_initiation_factor_3_subunit_J_OS=Drosophila_grimshawi_GN=Adam_PE=3_SV=1|||2e-25	37625-414_1_ORF2 (+1)	28 kDa		2			mapped	D8SKC7	108	D8SKC7_SELML	1.0016e-68	tr|D8SKC7|D8SKC7_SELML	37625-414_1_ORF2	tr|Q8GRX2|Q8GRX2_ARATH	Q8GRX2	Q8GRX2_ARATH	2.57437e-63
Scaffold	335754-50_1_ORF1	963	>sp|Q8UVD9|FUBP2_CHICK_Far_upstream_element-binding_protein_2_OS=Gallus_gallus_GN=KHSRP_PE=1_SV=1|||2e-24	335754-50_1_ORF1	77 kDa		2			mapped	D8QRQ4	109	D8QRQ4_SELML	2.5181e-49	tr|D8QRQ4|D8QRQ4_SELML	335754-50_1_ORF1	tr|O82762|O82762_ARATH	O82762	O82762_ARATH	3.56209e-55
Scaffold	276939-82_1_ORF1	55	>sp|Q6K4N0|RSZ21_ORYSJ_Serine/arginine-rich_splicing_factor_RSZ21_OS=Oryza_sativa_subsp._japonica_GN=RSZP21_PE=2_SV=1|||3e-20	276939-82_1_ORF1	14 kDa		2			notMapped		110				276939-82_1_ORF1	sp|O81126|RSZ22_ARATH	O81126	RSZ22_ARATH	9.17865e-08
Scaffold	259300-93_4_ORF1	148	>sp|Q6MC06|SYY_PARUW_Tyrosine--tRNA_ligase_OS=Protochlamydia_amoebophila_(strain_UWE25)_GN=tyrS_PE=3_SV=1|||3e-41	259300-93_4_ORF1 (+3)	20 kDa		2			notMapped		111				259300-93_4_ORF1	sp|Q9SJ20|RIR1_ARATH	Q9SJ20	RIR1_ARATH	0
Scaffold	214200-125_3_ORF1	996	>sp|Q9C5Z1|EIF3B_ARATH_Eukaryotic_translation_initiation_factor_3_subunit_B_OS=Arabidopsis_thaliana_GN=TIF3B1_PE=1_SV=1|||0	214200-125_3_ORF1 (+1)	86 kDa		2			mapped	D8SS57	112	D8SS57_SELML	0	tr|D8SS57|D8SS57_SELML	214200-125_3_ORF1	tr|Q8GUM1|Q8GUM1_ARATH	Q8GUM1	Q8GUM1_ARATH	0
Scaffold	21409-539_6_ORF2	682	>sp|P46336|IOLS_BACSU_Protein_IolS_OS=Bacillus_subtilis_(strain_168)_GN=iolS_PE=1_SV=1|||2e-13	21409-539_6_ORF2 (+1)	48 kDa		2			mapped	D8S0I0	113	D8S0I0_SELML	4.62837e-118	tr|D8S0I0|D8S0I0_SELML	21409-539_6_ORF2	sp|Q9M338|AKRCB_ARATH	Q9M338	AKRCB_ARATH	2.67781e-08
Scaffold	206459-132_3_ORF2	874	>sp|Q6FLF3|DBP2_CANGA_ATP-dependent_RNA_helicase_DBP2_OS=Candida_glabrata_(strain_ATCC_2001_/_CBS_138_/_JCM_3761_/_NBRC_0622_/_NRRL_Y-65)_GN=DBP2_PE=3_SV=1|||3e-120	206459-132_3_ORF2	63 kDa		2			mapped	D8QQR1	114	D8QQR1_SELML	0	tr|D8QQR1|D8QQR1_SELML	206459-132_3_ORF2	sp|Q9C718|RH20_ARATH	Q9C718	RH20_ARATH	7.08803e-113
Scaffold	1857-1435_5_ORF2	1079	Cluster of >sp|P31254|UBA1Y_MOUSE_Ubiquitin-like_modifier-activating_enzyme_1_Y_OS=Mus_musculus_GN=Ube1ay_PE=2_SV=2|||0 (1857-1435_5_ORF2)	1857-1435_5_ORF2 [5]	120 kDa	1	2	1	DAC	mapped	D8T5S9	115	D8T5S9_SELML	0	tr|D8T5S9|D8T5S9_SELML	1857-1435_5_ORF2	sp|P93028|UBE11_ARATH	P93028	UBE11_ARATH	0
Scaffold	183408-153_1_ORF1	7	>sp|Q88WI2|TRPC_LACPL_Indole-3-glycerol_phosphate_synthase_OS=Lactobacillus_plantarum_(strain_ATCC_BAA-793_/_NCIMB_8826_/_WCFS1)_GN=trpC_PE=3_SV=1|||2e-06	183408-153_1_ORF1	8 kDa		2			notMapped		116				183408-153_1_ORF1	sp|Q8W4B1|RCF3_ARATH	Q8W4B1	RCF3_ARATH	1.03584e-115
Scaffold	17832-586_6_ORF2	502	>sp|Q04832|HEXP_LEIMA_DNA-binding_protein_HEXBP_OS=Leishmania_major_GN=HEXBP_PE=4_SV=1|||6e-14	17832-586_6_ORF2 (+3)	38 kDa		2			notMapped		117				17832-586_6_ORF2	tr|A0A1P8B8F3|A0A1P8B8F3_ARATH	A0A1P8B8F3	A0A1P8B8F3_ARATH	1.40308e-08
Scaffold	164491-174_4_ORF2	45	>sp|Q9LE54|SP1L2_ARATH_Protein_SPIRAL1-like_2_OS=Arabidopsis_thaliana_GN=SP1L2_PE=2_SV=1|||1e-38	164491-174_4_ORF2	13 kDa		2			mapped	D8S266	118	D8S266_SELML	1.55796e-23	tr|D8S266|D8S266_SELML	164491-174_4_ORF2	sp|Q9LE54|SP1L2_ARATH	Q9LE54	SP1L2_ARATH	1.00896e-34
Scaffold	1588-1510_2_ORF1	686	>sp|Q54NQ0|PSD13_DICDI_26S_proteasome_non-ATPase_regulatory_subunit_13_OS=Dictyostelium_discoideum_GN=psmD13_PE=2_SV=1|||5e-96	1588-1510_2_ORF1 (+1)	49 kDa		2			mapped	D8QZY7	119	D8QZY7_SELML	0	tr|D8QZY7|D8QZY7_SELML	1588-1510_2_ORF1	sp|Q8GYA6|PS13B_ARATH	Q8GYA6	PS13B_ARATH	0
Scaffold	15530-621_2_ORF2	672	>sp|Q9MAU6|PDI22_ARATH_Protein_disulfide-isomerase_like_2-2_OS=Arabidopsis_thaliana_GN=PDIL2-2_PE=2_SV=2|||0	15530-621_2_ORF2	48 kDa		2			mapped	D8S0B3	120	D8S0B3_SELML	0	tr|D8S0B3|D8S0B3_SELML	15530-621_2_ORF2	sp|Q9MAU6|PDI22_ARATH	Q9MAU6	PDI22_ARATH	0
Scaffold	147017-201_3_ORF1	1050	>sp|Q9CAA0|COB21_ARATH_Coatomer_subunit_beta'-1_OS=Arabidopsis_thaliana_GN=At1g79990_PE=2_SV=2|||0	147017-201_3_ORF1	105 kDa		2			mapped	D8T1D4	121	D8T1D4_SELML	0	tr|D8T1D4|D8T1D4_SELML	147017-201_3_ORF1	sp|Q9C827|COB22_ARATH	Q9C827	COB22_ARATH	0
Scaffold	78049-285_4_ORF2	338	>sp|Q948P6|FRI3_SOYBN_Ferritin-3,_chloroplastic_OS=Glycine_max_PE=2_SV=1|||7e-107	78049-285_4_ORF2 (+1)	30 kDa	1	1.91	1	DAC	mapped	D8RJ32	122	D8RJ32_SELML	7.02456e-104	tr|D8RJ32|D8RJ32_SELML	78049-285_4_ORF2	sp|Q9S756|FRI4_ARATH	Q9S756	FRI4_ARATH	2.43137e-97
Scaffold	130359-215_1_ORF1	717	>sp|P17606|MDHP1_SORBI_Malate_dehydrogenase_[NADP]_1,_chloroplastic_OS=Sorghum_bicolor_PE=1_SV=1|||0	130359-215_1_ORF1	50 kDa	1	1.87	1	DAC	mapped	D8RY96	123	D8RY96_SELML	0	tr|D8RY96|D8RY96_SELML	130359-215_1_ORF1	sp|Q8H1E2|MDHNP_ARATH	Q8H1E2	MDHNP_ARATH	0
Scaffold	tr|A5B483|A5B483_VITVI	249	Putative uncharacterized protein OS=Vitis vinifera GN=VITISV_006813 PE=4 SV=1	tr|A5B483|A5B483_VITVI (+1)	25 kDa	1	1.81	1	DAC	mapped	D8QWM9	124	D8QWM9_SELML	4.56979e-72	tr|D8QWM9|D8QWM9_SELML	tr|A5B483|A5B483_VITVI	sp|Q93WL3|CLPT1_ARATH	Q93WL3	CLPT1_ARATH	1.6489e-94
Scaffold	56629-337_1_ORF2	1045	Cluster of >sp|Q9SA18|AKH1_ARATH_Bifunctional_aspartokinase/homoserine_dehydrogenase_1,_chloroplastic_OS=Arabidopsis_thaliana_GN=AKHSDH1_PE=1_SV=1|||0 (56629-337_1_ORF2)	56629-337_1_ORF2 [2]	103 kDa	1	1.81	1	DAC	mapped	D8RKV2	125	D8RKV2_SELML	0	tr|D8RKV2|D8RKV2_SELML	56629-337_1_ORF2	sp|Q9SA18|AKH1_ARATH	Q9SA18	AKH1_ARATH	0
Scaffold	334307-51_5_ORF2	721	Cluster of >sp|Q9LIA8|UGDH1_ARATH_Probable_UDP-glucose_6-dehydrogenase_1_OS=Arabidopsis_thaliana_GN=UGD1_PE=1_SV=1|||0 (334307-51_5_ORF2)	334307-51_5_ORF2 [2]	51 kDa	1	1.81	1	DAC	mapped	D8R4C3	126	D8R4C3_SELML	0	tr|D8R4C3|D8R4C3_SELML	334307-51_5_ORF2	sp|Q9LIA8|UGDH2_ARATH	Q9LIA8	UGDH2_ARATH	0
Scaffold	232487-112_2_ORF2	928	>sp|Q9LD55|EIF3A_ARATH_Eukaryotic_translation_initiation_factor_3_subunit_A_OS=Arabidopsis_thaliana_GN=TIF3A1_PE=1_SV=1|||4e-127	232487-112_2_ORF2 (+1)	70 kDa	1	1.81	1	DAC	notMapped		127				232487-112_2_ORF2	sp|Q94JV5|NILP2_ARATH	Q94JV5	NILP2_ARATH	6.00729e-142
Scaffold	211495-128_1_ORF2	204	>sp|Q8LJU5|RS7_ORYSJ_40S_ribosomal_protein_S7_OS=Oryza_sativa_subsp._japonica_GN=RPS7_PE=2_SV=2|||8e-114	211495-128_1_ORF2 (+3)	23 kDa	1	1.81	1	DAC	mapped	D8RMQ2	128	D8RMQ2_SELML	2.13948e-110	tr|D8RMQ2|D8RMQ2_SELML	211495-128_1_ORF2	sp|Q9C514|RS71_ARATH	Q9C514	RS71_ARATH	3.08072e-108
Scaffold	185883-150_2_ORF2	923	>sp|Q88C93|ALGC_PSEPK_Phosphomannomutase/phosphoglucomutase_OS=Pseudomonas_putida_(strain_KT2440)_GN=algC_PE=3_SV=1|||1e-46	185883-150_2_ORF2	69 kDa	1	1.81	1	DAC	mapped	D8RRZ3	129	D8RRZ3_SELML	0	tr|D8RRZ3|D8RRZ3_SELML	185883-150_2_ORF2	tr|F4KH14|F4KH14_ARATH	F4KH14	F4KH14_ARATH	0
Scaffold	278034-81_6_ORF2	720	>sp|P05455|LA_HUMAN_Lupus_La_protein_OS=Homo_sapiens_GN=SSB_PE=1_SV=2|||2e-22	278034-81_6_ORF2	50 kDa	1	1.74	1	DAC	mapped	D8R7Q6	130	D8R7Q6_SELML	8.05374e-92	tr|D8R7Q6|D8R7Q6_SELML	278034-81_6_ORF2	sp|Q93ZV7|LA1_ARATH	Q93ZV7	LA1_ARATH	1.05674e-96
Scaffold	20396-552_5_ORF2	806	>sp|Q9LNU4|PSD31_ARATH_Probable_26S_proteasome_non-ATPase_regulatory_subunit_3a_OS=Arabidopsis_thaliana_GN=EMB2719_PE=1_SV=3|||0	20396-552_5_ORF2	57 kDa	1	1.74	1	DAC	mapped	D8RHS0	131	D8RHS0_SELML	0	tr|D8RHS0|D8RHS0_SELML	20396-552_5_ORF2	sp|Q9LNU4|PSD3A_ARATH	Q9LNU4	PSD3A_ARATH	0
Scaffold	174106-162_4_ORF3	313	Cluster of >sp|P02398|RK12_SPIOL_50S_ribosomal_protein_L12,_chloroplastic_OS=Spinacia_oleracea_GN=RPL12_PE=1_SV=2|||9e-50 (174106-162_4_ORF3)	174106-162_4_ORF3 [5]	29 kDa	1	1.74	1	DAC	mapped	D8QZV6	132	D8QZV6_SELML	2.565e-40	tr|D8QZV6|D8QZV6_SELML	174106-162_4_ORF3	sp|P36212|RK123_ARATH	P36212	RK123_ARATH	1.16319e-40
Scaffold	150714-196_2_ORF1	1006	>sp|P35510|PAL1_ARATH_Phenylalanine_ammonia-lyase_1_OS=Arabidopsis_thaliana_GN=PAL1_PE=1_SV=3|||0	150714-196_2_ORF1 (+1)	89 kDa	1	1.74	1	DAC	mapped	D8SER3	133	D8SER3_SELML	0	tr|D8SER3|D8SER3_SELML	150714-196_2_ORF1	sp|Q9SS45|PAL4_ARATH	Q9SS45	PAL4_ARATH	0
Scaffold	181944-154_3_ORF2	855	Cluster of >sp|P49787|ACCC1_BACSU_Biotin_carboxylase_1_OS=Bacillus_subtilis_(strain_168)_GN=accC1_PE=3_SV=3|||0 (181944-154_3_ORF2)	181944-154_3_ORF2 [5]	62 kDa	1	1.7	1	DAC	mapped	D8QXH7	134	D8QXH7_SELML	0	tr|D8QXH7|D8QXH7_SELML	181944-154_3_ORF2	sp|O04983|ACCC_ARATH	O04983	ACCC_ARATH	0
Scaffold	5101-990_2_ORF1	253	Cluster of >sp|Q9FJA6|RS33_ARATH_40S_ribosomal_protein_S3-3_OS=Arabidopsis_thaliana_GN=RPS3C_PE=1_SV=1|||3e-145 (5101-990_2_ORF1)	5101-990_2_ORF1 [6]	26 kDa	1	1.66	1	DAC	mapped	D8QYU9	135	D8QYU9_SELML	1.71606e-150	tr|D8QYU9|D8QYU9_SELML	5101-990_2_ORF1	sp|Q9FJA6|RS33_ARATH	Q9FJA6	RS33_ARATH	3.43221e-142
Scaffold	154235-189_3_ORF2	225	Cluster of >sp|Q9M612|NACA_PINTA_Nascent_polypeptide-associated_complex_subunit_alpha-like_protein_OS=Pinus_taeda_PE=2_SV=1|||3e-82 (154235-189_3_ORF2)	154235-189_3_ORF2 [8]	24 kDa	1	1.66	1	DAC	mapped	D8RVN1	136	D8RVN1_SELML	6.55413e-80	tr|D8RVN1|D8RVN1_SELML	154235-189_3_ORF2	sp|Q9LHG9|NACA1_ARATH	Q9LHG9	NACA1_ARATH	5.72499e-72
Scaffold	tr|B7FGL9|B7FGL9_MEDTR	232	Cluster of Ribosomal protein OS=Medicago truncatula GN=MTR_3g070930 PE=2 SV=1 (tr|B7FGL9|B7FGL9_MEDTR)	tr|B7FGL9|B7FGL9_MEDTR [8]	24 kDa	1	1.64	1	DAC	mapped	D8QZ46	137	D8QZ46_SELML	6.18257e-122	tr|D8QZ46|D8QZ46_SELML	tr|B7FGL9|B7FGL9_MEDTR	sp|Q8VZB9|R10A1_ARATH	Q8VZB9	R10A1_ARATH	1.37179e-128
Scaffold	tr|Q8GTZ6|Q8GTZ6_CHAVU	463	Malate dehydrogenase OS=Chara vulgaris GN=NAD-MDH PE=2 SV=1	tr|Q8GTZ6|Q8GTZ6_CHAVU	36 kDa		1.58			mapped	D8T711	138	D8T711_SELML	3.87073e-175	tr|D8T711|D8T711_SELML	tr|Q8GTZ6|Q8GTZ6_CHAVU	sp|P57106|MDHC2_ARATH	P57106	MDHC2_ARATH	6.3502e-177
Scaffold	tr|Q3SC88|Q3SC88_SOLLC	637	Thylakoid-bound ascorbate peroxidase 6 (Fragment) OS=Solanum lycopersicum GN=APX6 PE=2 SV=1	tr|Q3SC88|Q3SC88_SOLLC	46 kDa		1.58			mapped	D8R6L3	139	D8R6L3_SELML	2.2085e-179	tr|D8R6L3|D8R6L3_SELML	tr|Q3SC88|Q3SC88_SOLLC	sp|Q42593|APXT_ARATH	Q42593	APXT_ARATH	0
Scaffold	tr|E1ZG10|E1ZG10_CHLVA	389	Putative uncharacterized protein OS=Chlorella variabilis GN=CHLNCDRAFT_134457 PE=4 SV=1	tr|E1ZG10|E1ZG10_CHLVA	32 kDa		1.58			notMapped		140				tr|E1ZG10|E1ZG10_CHLVA	sp|P47998|CYSK1_ARATH	P47998	CYSK1_ARATH	1.6149e-143
Scaffold	tr|C1EJ55|C1EJ55_MICSR	669	Serine hydroxymethyltransferase OS=Micromonas sp. (strain RCC299 / NOUM17) GN=SHMT2_GHMT2 PE=3 SV=1	tr|C1EJ55|C1EJ55_MICSR	48 kDa		1.58			notMapped		141				tr|C1EJ55|C1EJ55_MICSR	sp|Q8RXU5|R37A2_ARATH	Q8RXU5	R37A2_ARATH	7.99235e-49
Scaffold	tr|B9SYT1|B9SYT1_RICCO	124	Skp1, putative OS=Ricinus communis GN=RCOM_0362150 PE=4 SV=1	tr|B9SYT1|B9SYT1_RICCO	18 kDa		1.58			notMapped		142				tr|B9SYT1|B9SYT1_RICCO	sp|Q9ZPI1|SYKC_ARATH	Q9ZPI1	SYKC_ARATH	0
Scaffold	tr|B7FHY1|B7FHY1_MEDTR	288	Proteasome subunit alpha type OS=Medicago truncatula PE=2 SV=1	tr|B7FHY1|B7FHY1_MEDTR	27 kDa	1	1.58	1	DAC	mapped	D8RLK8	143	D8RLK8_SELML	4.77981e-145	tr|D8RLK8|D8RLK8_SELML	tr|B7FHY1|B7FHY1_MEDTR	sp|O23715|PSA3_ARATH	O23715	PSA3_ARATH	8.2052e-166
Scaffold	tr|A9SYD3|A9SYD3_PHYPA	1062	Predicted protein OS=Physcomitrella patens subsp. patens GN=PHYPADRAFT_234477 PE=4 SV=1	tr|A9SYD3|A9SYD3_PHYPA	110 kDa	1	1.58	1	DAC	notMapped		144				tr|A9SYD3|A9SYD3_PHYPA	sp|Q1H537|DCVR_ARATH	Q1H537	DCVR_ARATH	5.89438e-176
Scaffold	tr|A9S7U7|A9S7U7_PHYPA	388	Predicted protein (Fragment) OS=Physcomitrella patens subsp. patens GN=PHYPADRAFT_125478 PE=4 SV=1	tr|A9S7U7|A9S7U7_PHYPA	32 kDa		1.58			mapped	D8QQN0	145	D8QQN0_SELML	1.09345e-162	tr|D8QQN0|D8QQN0_SELML	tr|A9S7U7|A9S7U7_PHYPA	sp|Q8W593|LGUC_ARATH	Q8W593	LGUC_ARATH	4.67261e-162
Scaffold	tr|A9NNQ2|A9NNQ2_PICSI	405	Putative uncharacterized protein OS=Picea sitchensis PE=2 SV=1	tr|A9NNQ2|A9NNQ2_PICSI	33 kDa		1.58			notMapped		146				tr|A9NNQ2|A9NNQ2_PICSI	sp|Q94JX5|WLIM1_ARATH	Q94JX5	WLIM1_ARATH	3.73265e-94
Scaffold	sp|Q9LST7|PSB3_ORYSJ	202	Proteasome subunit beta type-3 OS=Oryza sativa subsp. japonica GN=PBC1 PE=2 SV=1	sp|Q9LST7|PSB3_ORYSJ (+5)	23 kDa	1	1.58	1	DAC	mapped	D8R370	147	D8R370_SELML	1.72946e-122	tr|D8R370|D8R370_SELML	sp|Q9LST7|PSB3_ORYSJ	sp|Q9XI05|PSB3A_ARATH	Q9XI05	PSB3A_ARATH	1.4282e-137
Scaffold	sp|P49040|SUS1_ARATH	1020	Sucrose synthase 1 OS=Arabidopsis thaliana GN=SUS1 PE=1 SV=3	sp|P49040|SUS1_ARATH (+3)	93 kDa		1.58			notMapped		148				sp|P49040|SUS1_ARATH	sp|O03042|RBL_ARATH	O03042	RBL_ARATH	0
Scaffold	sp|O49595-2|HMGB1_ARATH	166	Isoform 2 of High mobility group B protein 1 OS=Arabidopsis thaliana GN=HMGB1	sp|O49595-2|HMGB1_ARATH (+7)	21 kDa		1.58			mapped	D8QNW7	149	D8QNW7_SELML	3.72313e-34	tr|D8QNW7|D8QNW7_SELML	sp|O49595-2|HMGB1_ARATH	sp|O49595|HMGB1_ARATH	O49595	HMGB1_ARATH	1.85748e-118
Scaffold	rr|REV_D8UDJ6|REV_D8UDJ6_VOLCA	1109	Putative uncharacterized protein OS=Volvox carteri GN=VOLCADRAFT_97751 PE=4 SV=1	rr|REV_D8UDJ6|REV_D8UDJ6_VOLCA	179 kDa		1.58			notMapped		150				rr|REV_D8UDJ6|REV_D8UDJ6_VOLCA	tr|Q9SKZ0|Q9SKZ0_ARATH	Q9SKZ0	Q9SKZ0_ARATH	4.18317e-48
Scaffold	rr|REV_C5WVC8|REV_C5WVC8_SORBI	1025	Putative uncharacterized protein Sb01g017000 OS=Sorghum bicolor GN=Sb01g017000 PE=4 SV=1	rr|REV_C5WVC8|REV_C5WVC8_SORBI	94 kDa		1.58			notMapped		151				rr|REV_C5WVC8|REV_C5WVC8_SORBI	tr|Q9SKZ0|Q9SKZ0_ARATH	Q9SKZ0	Q9SKZ0_ARATH	4.18317e-48
Scaffold	rr|REV_C1MS97|REV_C1MS97_MICPC	967	Predicted protein OS=Micromonas pusilla (strain CCMP1545) GN=MICPUCDRAFT_58401 PE=4 SV=1	rr|REV_C1MS97|REV_C1MS97_MICPC	78 kDa		1.58			notMapped		152				rr|REV_C1MS97|REV_C1MS97_MICPC	tr|Q9SKZ0|Q9SKZ0_ARATH	Q9SKZ0	Q9SKZ0_ARATH	4.18317e-48
Scaffold	rr|REV_B9I648|REV_B9I648_POPTR	1067	Predicted protein OS=Populus trichocarpa GN=POPTRDRAFT_571278 PE=4 SV=1	rr|REV_B9I648|REV_B9I648_POPTR (+1)	113 kDa		1.58			notMapped		153				rr|REV_B9I648|REV_B9I648_POPTR	tr|Q9SKZ0|Q9SKZ0_ARATH	Q9SKZ0	Q9SKZ0_ARATH	4.18317e-48
Scaffold	REV_433103-2_3_ORF2	931	REV_433103-2_3_ORF2	REV_433103-2_3_ORF2 (+3)	70 kDa		1.58			notMapped		154				REV_433103-2_3_ORF2	tr|Q9SKZ0|Q9SKZ0_ARATH	Q9SKZ0	Q9SKZ0_ARATH	4.18317e-48
Scaffold	81762-278_5_ORF1	870	>sp|P32746|PYRD_ARATH_Dihydroorotate_dehydrogenase_(quinone),_mitochondrial_OS=Arabidopsis_thaliana_GN=PYRD_PE=1_SV=2|||0	81762-278_5_ORF1 (+1)	63 kDa		1.58			mapped	D8RAG3	155	D8RAG3_SELML	0	tr|D8RAG3|D8RAG3_SELML	81762-278_5_ORF1	sp|P32746|PYRD_ARATH	P32746	PYRD_ARATH	0
Scaffold	63998-316_2_ORF1	839	>sp|Q71VM4|IMA1A_ORYSJ_Importin_subunit_alpha-1a_OS=Oryza_sativa_subsp._japonica_GN=Os01g0253300_PE=1_SV=2|||0	63998-316_2_ORF1	59 kDa	1	1.58	1	DAC	mapped	D8QMK6	156	D8QMK6_SELML	0	tr|D8QMK6|D8QMK6_SELML	63998-316_2_ORF1	sp|Q96321|IMPA1_ARATH	Q96321	IMPA1_ARATH	0
Scaffold	592-1952_4_ORF1	767	>sp|Q16TA2|RUVB2_AEDAE_RuvB-like_helicase_2_OS=Aedes_aegypti_GN=rept_PE=3_SV=1|||0	592-1952_4_ORF1 (+1)	53 kDa		1.58			mapped	D8R904	157	D8R904_SELML	0	tr|D8R904|D8R904_SELML	592-1952_4_ORF1	tr|Q9FJW0|Q9FJW0_ARATH	Q9FJW0	Q9FJW0_ARATH	0
Scaffold	47170-370_1_ORF2	97	>sp|Q38936|FK152_ARATH_Peptidyl-prolyl_cis-trans_isomerase_FKBP15-2_OS=Arabidopsis_thaliana_GN=FKBP15-2_PE=2_SV=2|||3e-76	47170-370_1_ORF2 (+1)	17 kDa		1.58			mapped	D8R4K2	158	D8R4K2_SELML	9.88962e-69	tr|D8R4K2|D8R4K2_SELML	47170-370_1_ORF2	sp|Q38936|FK152_ARATH	Q38936	FK152_ARATH	9.54476e-73
Scaffold	40578-399_3_ORF2	94	>sp|Q32RV2|RK14_STAPU_50S_ribosomal_protein_L14,_chloroplastic_OS=Staurastrum_punctulatum_GN=rpl14_PE=3_SV=1|||3e-74	40578-399_3_ORF2 (+2)	17 kDa		1.58			mapped	D8TEA4	159	D8TEA4_SELML	4.13908e-51	tr|D8TEA4|D8TEA4_SELML	40578-399_3_ORF2	sp|P56792|RK14_ARATH	P56792	RK14_ARATH	1.47279e-60
Scaffold	37993-412_6_ORF2	1059	no_acceptable_match|||NA	37993-412_6_ORF2	109 kDa		1.58			mapped	D8T868	160	D8T868_SELML	0	tr|D8T868|D8T868_SELML	37993-412_6_ORF2	sp|Q9SV21|COPB1_ARATH	Q9SV21	COPB1_ARATH	0
Scaffold	359275-40_6_ORF2	704	>sp|Q94K73|SYFM_ARATH_Phenylalanine--tRNA_ligase,_chloroplastic/mitochondrial_OS=Arabidopsis_thaliana_GN=At3g58140_PE=1_SV=1|||0	359275-40_6_ORF2	50 kDa		1.58			mapped	D8QUH7	161	D8QUH7_SELML	0	tr|D8QUH7|D8QUH7_SELML	359275-40_6_ORF2	sp|Q94K73|SYFM_ARATH	Q94K73	SYFM_ARATH	0
Scaffold	342494-47_1_ORF1	690	>sp|B0C4N8|ISPH_ACAM1_4-hydroxy-3-methylbut-2-enyl_diphosphate_reductase_OS=Acaryochloris_marina_(strain_MBIC_11017)_GN=ispH_PE=3_SV=1|||0	342494-47_1_ORF1 (+2)	49 kDa		1.58			mapped	D8QQT9	162	D8QQT9_SELML	0	tr|D8QQT9|D8QQT9_SELML	342494-47_1_ORF1	sp|Q94B35|ISPH_ARATH	Q94B35	ISPH_ARATH	0
Scaffold	321167-57_2_ORF1	516	>sp|P14832|CYPH_YEAST_Peptidyl-prolyl_cis-trans_isomerase_OS=Saccharomyces_cerevisiae_(strain_ATCC_204508_/_S288c)_GN=CPR1_PE=1_SV=3|||1e-21	321167-57_2_ORF1 (+1)	39 kDa		1.58			mapped	D8RKY7	163	D8RKY7_SELML	3.18644e-94	tr|D8RKY7|D8RKY7_SELML	321167-57_2_ORF1	sp|F4HTT6|CP26B_ARATH	F4HTT6	CP26B_ARATH	3.40245e-67
Scaffold	315608-60_3_ORF2	337	>sp|P27806|H1_WHEAT_Histone_H1_OS=Triticum_aestivum_PE=2_SV=2|||6e-28	315608-60_3_ORF2	30 kDa	1	1.58	1	DAC	mapped	D8RI27	164	D8RI27_SELML	1.40827e-21	tr|D8RI27|D8RI27_SELML	315608-60_3_ORF2	tr|F4INW2|F4INW2_ARATH	F4INW2	F4INW2_ARATH	8.99916e-24
Scaffold	304983-66_2_ORF2	504	>sp|F4J117|LSF1_ARATH_Phosphoglucan_phosphatase_LSF1,_chloroplastic_OS=Arabidopsis_thaliana_GN=LSF1_PE=1_SV=1|||6e-12	304983-66_2_ORF2	38 kDa	1	1.58	1	DAC	mapped	D8T770	165	D8T770_SELML	1.14997e-129	tr|D8T770|D8T770_SELML	304983-66_2_ORF2	sp|Q94BS2|MET1_ARATH	Q94BS2	MET1_ARATH	6.28745e-110
Scaffold	2941-1222_2_ORF2	446	>sp|Q6NCY6|GRPE_RHOPA_Protein_GrpE_OS=Rhodopseudomonas_palustris_(strain_ATCC_BAA-98_/_CGA009)_GN=grpE_PE=3_SV=2|||2e-37	2941-1222_2_ORF2	35 kDa		1.58			mapped	D8R8N7	166	D8R8N7_SELML	1.6281e-45	tr|D8R8N7|D8R8N7_SELML	2941-1222_2_ORF2	sp|Q8LB47|MGE2_ARATH	Q8LB47	MGE2_ARATH	2.54232e-49
Scaffold	265091-89_3_ORF2	488	>sp|Q3SW78|GRPE_NITWN_Protein_GrpE_OS=Nitrobacter_winogradskyi_(strain_Nb-255_/_ATCC_25391)_GN=grpE_PE=3_SV=1|||2e-47	265091-89_3_ORF2 (+2)	37 kDa		1.58			mapped	D8QQ93	167	D8QQ93_SELML	3.96499e-54	tr|D8QQ93|D8QQ93_SELML	265091-89_3_ORF2	sp|Q8LB47|MGE2_ARATH	Q8LB47	MGE2_ARATH	3.33115e-50
Scaffold	246374-102_1_ORF1	791	>sp|Q9SK82|U85A1_ARATH_UDP-glycosyltransferase_85A1_OS=Arabidopsis_thaliana_GN=UGT85A1_PE=1_SV=1|||9e-94	246374-102_1_ORF1	56 kDa		1.58			mapped	D8R4L9	168	D8R4L9_SELML	1.49838e-87	tr|D8R4L9|D8R4L9_SELML	246374-102_1_ORF1	sp|Q9SK82|U85A1_ARATH	Q9SK82	U85A1_ARATH	1.20251e-90
Scaffold	245350-103_2_ORF2	831	>sp|O43719|HTSF1_HUMAN_HIV_Tat-specific_factor_1_OS=Homo_sapiens_GN=HTATSF1_PE=1_SV=1|||1e-42	245350-103_2_ORF2	59 kDa		1.58			mapped	D8QS89	169	D8QS89_SELML	1.40705e-149	tr|D8QS89|D8QS89_SELML	245350-103_2_ORF2	tr|Q9LF02|Q9LF02_ARATH	Q9LF02	Q9LF02_ARATH	8.18951e-145
Scaffold	24293-509_5_ORF2	698	Cluster of >sp|Q9M591|CRD1_ARATH_Magnesium-protoporphyrin_IX_monomethyl_ester_[oxidative]_cyclase,_chloroplastic_OS=Arabidopsis_thaliana_GN=CRD1_PE=2_SV=2|||0 (24293-509_5_ORF2)	24293-509_5_ORF2 [2]	49 kDa		1.58			mapped	D8RAZ0	170	D8RAZ0_SELML	0	tr|D8RAZ0|D8RAZ0_SELML	24293-509_5_ORF2	sp|Q9M591|CRD1_ARATH	Q9M591	CRD1_ARATH	0
Scaffold	237628-108_3_ORF2	718	>sp|P16127|CHLI1_ARATH_Magnesium-chelatase_subunit_ChlI-1,_chloroplastic_OS=Arabidopsis_thaliana_GN=CHLI1_PE=1_SV=1|||0	237628-108_3_ORF2 (+2)	50 kDa	1	1.58	1	DAC	mapped	D8T1P5	171	D8T1P5_SELML	0	tr|D8T1P5|D8T1P5_SELML	237628-108_3_ORF2	sp|P16127|CHLI1_ARATH	P16127	CHLI1_ARATH	0
Scaffold	228328-115_1_ORF2	427	>sp|O04202|EIF3F_ARATH_Eukaryotic_translation_initiation_factor_3_subunit_F_OS=Arabidopsis_thaliana_GN=TIF3F1_PE=2_SV=1|||8e-123	228328-115_1_ORF2	33 kDa		1.58			mapped	D8QX02	172	D8QX02_SELML	5.08669e-175	tr|D8QX02|D8QX02_SELML	228328-115_1_ORF2	sp|O04202|EIF3F_ARATH	O04202	EIF3F_ARATH	8.91941e-120
Scaffold	212563-127_1_ORF2	1063	>sp|Q1XDE2|RR1_PORYE_30S_ribosomal_protein_S1,_chloroplastic_OS=Porphyra_yezoensis_GN=rps1_PE=3_SV=2|||8e-25	212563-127_1_ORF2	111 kDa	1	1.58	1	DAC	mapped	D8RQA0	173	D8RQA0_SELML	2.53518e-13	tr|D8RQA0|D8RQA0_SELML	212563-127_1_ORF2	tr|Q9M9H4|Q9M9H4_ARATH	Q9M9H4	Q9M9H4_ARATH	1.72252e-46
Scaffold	207564-131_3_ORF1	431	>sp|Q55535|Y328_SYNY3_Putative_low_molecular_weight_protein-tyrosine-phosphatase_slr0328_OS=Synechocystis_sp._(strain_PCC_6803_/_Kazusa)_GN=slr0328_PE=3_SV=1|||8e-22	207564-131_3_ORF1	34 kDa	1	1.58	1	DAC	mapped	D8RAC8	174	D8RAC8_SELML	7.01598e-15	tr|D8RAC8|D8RAC8_SELML	207564-131_3_ORF1	tr|Q67YE7|Q67YE7_ARATH	Q67YE7	Q67YE7_ARATH	9.72498e-15
Scaffold	177666-158_1_ORF2	863	>sp|A7SDW5|EIF3L_NEMVE_Eukaryotic_translation_initiation_factor_3_subunit_L_OS=Nematostella_vectensis_GN=v1g169424_PE=3_SV=1|||2e-170	177666-158_1_ORF2	62 kDa		1.58			mapped	D8RD49	175	D8RD49_SELML	0	tr|D8RD49|D8RD49_SELML	177666-158_1_ORF2	tr|F4JY76|F4JY76_ARATH	F4JY76	F4JY76_ARATH	0
Scaffold	176940-159_5_ORF1	529	Cluster of >sp|Q75M08|PDI21_ORYSJ_Protein_disulfide_isomerase-like_2-1_OS=Oryza_sativa_subsp._japonica_GN=PDIL2-1_PE=2_SV=2|||9e-177 (176940-159_5_ORF1)	176940-159_5_ORF1 [4]	39 kDa	1	1.58	1	DAC	mapped	D8S914	176	D8S914_SELML	1.36189e-158	tr|D8S914|D8S914_SELML	176940-159_5_ORF1	sp|O22263|PDI21_ARATH	O22263	PDI21_ARATH	4.77599e-170
Scaffold	171951-165_5_ORF2	339	>sp|P77326|TFAS_ECOLI_Putative_tail_fiber_assembly_protein_homolog_from_prophage_CPS-53_OS=Escherichia_coli_(strain_K12)_GN=tfaS_PE=5_SV=1|||3e-08	171951-165_5_ORF2	30 kDa		1.58			mapped	D8RSY9	177	D8RSY9_SELML	3.58191e-42	tr|D8RSY9|D8RSY9_SELML	171951-165_5_ORF2	tr|Q0IGM5|Q0IGM5_ARATH	Q0IGM5	Q0IGM5_ARATH	5.09582e-38
Scaffold	170830-166_2_ORF1	544	>sp|O66119|ODP2_ZYMMO_Dihydrolipoyllysine-residue_acetyltransferase_component_of_pyruvate_dehydrogenase_complex_OS=Zymomonas_mobilis_subsp._mobilis_(strain_ATCC_31821_/_ZM4_/_CP4)_GN=pdhC_PE=3_SV=2|||6e-62	170830-166_2_ORF1	40 kDa	1	1.58	1	DAC	mapped	D8QPY3	178	D8QPY3_SELML	2.82942e-179	tr|D8QPY3|D8QPY3_SELML	170830-166_2_ORF1	sp|Q9C8P0|ODP25_ARATH	Q9C8P0	ODP25_ARATH	4.18113e-174
Scaffold	167954-169_4_ORF1	919	no_acceptable_match|||NA	167954-169_4_ORF1	68 kDa	1	1.58	1	DAC	mapped	D8RAI0	179	D8RAI0_SELML	0	tr|D8RAI0|D8RAI0_SELML	167954-169_4_ORF1	sp|O80763|NRX1_ARATH	O80763	NRX1_ARATH	8.1609e-154
Scaffold	167415-170_4_ORF2	498	>sp|Q7Z9I2|YCP9_SCHPO_Uncharacterized_oxidoreductase_C663.09c_OS=Schizosaccharomyces_pombe_(strain_972_/_ATCC_24843)_GN=SPCC663.09c_PE=2_SV=1|||1e-25	167415-170_4_ORF2	38 kDa	1	1.58	1	DAC	mapped	D8RF44	180	D8RF44_SELML	1.54291e-67	tr|D8RF44|D8RF44_SELML	167415-170_4_ORF2	tr|Q941A7|Q941A7_ARATH	Q941A7	Q941A7_ARATH	2.59427e-80
Scaffold	161-2777_2_ORF2	1054	>sp|Q8VZF3|CGEP_ARATH_Probable_glutamyl_endopeptidase,_chloroplastic_OS=Arabidopsis_thaliana_GN=GEP_PE=2_SV=2|||0	161-2777_2_ORF2 (+1)	106 kDa	1	1.58	1	DAC	notMapped		181				161-2777_2_ORF2	tr|Q9T0L5|Q9T0L5_ARATH	Q9T0L5	Q9T0L5_ARATH	5.25032e-12
Scaffold	160536-179_2_ORF1	862	no_acceptable_match|||NA	160536-179_2_ORF1	62 kDa	1	1.58	1	DAC	mapped	D8TCH7	182	D8TCH7_SELML	0	tr|D8TCH7|D8TCH7_SELML	160536-179_2_ORF1	sp|O50008|METE1_ARATH	O50008	METE1_ARATH	0
Scaffold	14509-636_6_ORF1	912	>sp|Q9SKY8|HSP7H_ARATH_Heat_shock_70_kDa_protein_8_OS=Arabidopsis_thaliana_GN=HSP70-8_PE=2_SV=1|||0	14509-636_6_ORF1 (+2)	67 kDa	1	1.58	1	DAC	mapped	D8SBL9	183	D8SBL9_SELML	0	tr|D8SBL9|D8SBL9_SELML	14509-636_6_ORF1	sp|Q9SKY8|HSP7H_ARATH	Q9SKY8	HSP7H_ARATH	0
Scaffold	143453-204_6_ORF2	867	Cluster of >sp|P72740|DLDH_SYNY3_Dihydrolipoyl_dehydrogenase_OS=Synechocystis_sp._(strain_PCC_6803_/_Kazusa)_GN=lpdA_PE=1_SV=3|||0 (143453-204_6_ORF2)	143453-204_6_ORF2 [2]	63 kDa	1	1.58	1	DAC	mapped	D8SFR3	184	D8SFR3_SELML	0	tr|D8SFR3|D8SFR3_SELML	143453-204_6_ORF2	sp|A8MS68|PLPD1_ARATH	A8MS68	PLPD1_ARATH	0
Scaffold	142203-205_1_ORF1	65	>sp|Q9SK39|SBP3_ARATH_Probable_steroid-binding_protein_3_OS=Arabidopsis_thaliana_GN=MP3_PE=1_SV=1|||2e-46	142203-205_1_ORF1	15 kDa	1	1.58	1	DAC	mapped	D8RQX1	185	D8RQX1_SELML	3.48995e-39	tr|D8RQX1|D8RQX1_SELML	142203-205_1_ORF1	sp|Q9SK39|SBP3_ARATH	Q9SK39	SBP3_ARATH	1.60057e-42
Scaffold	125957-219_2_ORF2	69	>sp|O24415|RLA2B_MAIZE_60S_acidic_ribosomal_protein_P2B_OS=Zea_mays_GN=RPP2B_PE=1_SV=1|||7e-32	125957-219_2_ORF2 (+1)	15 kDa		1.58			mapped	D8R8W3	186	D8R8W3_SELML	8.79729e-24	tr|D8R8W3|D8R8W3_SELML	125957-219_2_ORF2	tr|F4IGR3|F4IGR3_ARATH	F4IGR3	F4IGR3_ARATH	2.49334e-29
Scaffold	125297-220_1_ORF2	526	Cluster of no_acceptable_match|||NA (125297-220_1_ORF2)	125297-220_1_ORF2 [3]	39 kDa	1	1.58	1	DAC	mapped	D8R5U0	187	D8R5U0_SELML	5.64982e-57	tr|D8R5U0|D8R5U0_SELML	125297-220_1_ORF2	sp|O49290|CPPM_ARATH	O49290	CPPM_ARATH	0
Scaffold	12492-682_3_ORF1	730	>sp|P25269|TRBP2_ARATH_Tryptophan_synthase_beta_chain_2,_chloroplastic_OS=Arabidopsis_thaliana_GN=TSB2_PE=2_SV=2|||0	12492-682_3_ORF1	51 kDa		1.58			mapped	D8SGA5	188	D8SGA5_SELML	0	tr|D8SGA5|D8SGA5_SELML	12492-682_3_ORF1	sp|P14671|TRPB1_ARATH	P14671	TRPB1_ARATH	0
Scaffold	118426-227_3_ORF1	1038	>sp|E1BMF7|UBP13_BOVIN_Ubiquitin_carboxyl-terminal_hydrolase_13_OS=Bos_taurus_GN=USP13_PE=3_SV=2|||0	118426-227_3_ORF1 (+1)	100 kDa		1.58			notMapped		189				118426-227_3_ORF1	sp|A1A6K6|NSRA_ARATH	A1A6K6	NSRA_ARATH	4.35538e-38
Scaffold	37946-412_5_ORF2	655	Cluster of >sp|P17094|RL31_ARATH_60S_ribosomal_protein_L3-1_OS=Arabidopsis_thaliana_GN=ARP1_PE=2_SV=5|||0 (37946-412_5_ORF2)	37946-412_5_ORF2 [11]	47 kDa	1	1.53	1	DAC	mapped	D8RYD9	190	D8RYD9_SELML	0	tr|D8RYD9|D8RYD9_SELML	37946-412_5_ORF2	sp|P22738|RL32_ARATH	P22738	RL32_ARATH	0
Scaffold	tr|E1Z4T9|E1Z4T9_CHLVA	684	Cluster of Aspartate aminotransferase OS=Chlorella variabilis GN=CHLNCDRAFT_137913 PE=3 SV=1 (tr|E1Z4T9|E1Z4T9_CHLVA)	tr|E1Z4T9|E1Z4T9_CHLVA [7]	48 kDa	1	1.51	1	DAC	mapped	D8RP46	191	D8RP46_SELML	0	tr|D8RP46|D8RP46_SELML	tr|E1Z4T9|E1Z4T9_CHLVA	sp|P46248|AAT5_ARATH	P46248	AAT5_ARATH	0
Scaffold	7438-849_3_ORF2	332	>sp|Q9M3V8|RS6_ASPOF_40S_ribosomal_protein_S6_OS=Asparagus_officinalis_GN=rps6_PE=2_SV=1|||3e-158	7438-849_3_ORF2	29 kDa	1	1.5	1	DAC	mapped	D8RMS7	192	D8RMS7_SELML	2.02594e-151	tr|D8RMS7|D8RMS7_SELML	7438-849_3_ORF2	sp|P51430|RS62_ARATH	P51430	RS62_ARATH	1.13355e-150
Scaffold	253968-97_2_ORF2	613	>sp|P29344|RR1_SPIOL_30S_ribosomal_protein_S1,_chloroplastic_OS=Spinacia_oleracea_GN=RPS1_PE=1_SV=1|||2e-159	253968-97_2_ORF2	44 kDa	1	1.5	1	DAC	mapped	D8RQA0	193	D8RQA0_SELML	2.05452e-134	tr|D8RQA0|D8RQA0_SELML	253968-97_2_ORF2	sp|Q93VC7|RPS1_ARATH	Q93VC7	RPS1_ARATH	1.33489e-149
Scaffold	74067-293_2_ORF2	756	Cluster of >sp|Q25563|TBA13_NAEGR_Tubulin_alpha-13_chain_OS=Naegleria_gruberi_GN=TUBA13_PE=2_SV=1|||0 (74067-293_2_ORF2)	74067-293_2_ORF2 [11]	52 kDa	1	1.49	1	DAC	mapped	D8SE24	194	D8SE24_SELML	0	tr|D8SE24|D8SE24_SELML	74067-293_2_ORF2	sp|Q0WV25|TBA4_ARATH	Q0WV25	TBA4_ARATH	0
Scaffold	30973-455_4_ORF2	358	>sp|P60040|RL72_ARATH_60S_ribosomal_protein_L7-2_OS=Arabidopsis_thaliana_GN=RPL7B_PE=1_SV=1|||5e-144	30973-455_4_ORF2	31 kDa	1	1.49	1	DAC	mapped	D8RWP2	195	D8RWP2_SELML	5.37938e-151	tr|D8RWP2|D8RWP2_SELML	30973-455_4_ORF2	sp|P60040|RL72_ARATH	P60040	RL72_ARATH	5.35644e-141
Scaffold	849-1746_6_ORF2	452	>sp|P28644|ROC1_SPIOL_28_kDa_ribonucleoprotein,_chloroplastic_OS=Spinacia_oleracea_PE=1_SV=1|||8e-67	849-1746_6_ORF2	35 kDa	1	1.45	1	DAC	mapped	D8TAY9	196	D8TAY9_SELML	1.17041e-57	tr|D8TAY9|D8TAY9_SELML	849-1746_6_ORF2	sp|Q04836|CP31A_ARATH	Q04836	CP31A_ARATH	1.41786e-58
Scaffold	186611-150_1_ORF2	1004	Cluster of >sp|Q9STX5|ENPL_ARATH_Endoplasmin_homolog_OS=Arabidopsis_thaliana_GN=SHD_PE=1_SV=1|||0 (186611-150_1_ORF2)	186611-150_1_ORF2 [10]	88 kDa	1	1.43	1	DAC	mapped	D8TAK0	197	D8TAK0_SELML	0	tr|D8TAK0|D8TAK0_SELML	186611-150_1_ORF2	sp|Q9SIF2|HS905_ARATH	Q9SIF2	HS905_ARATH	0
Scaffold	156255-186_1_ORF2	925	no_acceptable_match|||NA	156255-186_1_ORF2 (+3)	69 kDa	1	1.43	1	DAC	mapped	D8RPB3	198	D8RPB3_SELML	5.56266e-14	tr|D8RPB3|D8RPB3_SELML	156255-186_1_ORF2	sp|F4J4N3|DIR17_ARATH	F4J4N3	DIR17_ARATH	1.80966e-09
Scaffold	362879-38_5_ORF2	182	>sp|B3CPY0|RS16_WOLPP_30S_ribosomal_protein_S16_OS=Wolbachia_pipientis_subsp._Culex_pipiens_(strain_wPip)_GN=rpsP_PE=3_SV=1|||6e-29	362879-38_5_ORF2 (+2)	22 kDa	1	1.42	1	DAC	notMapped		199				362879-38_5_ORF2	sp|Q9SZQ5|VIP3_ARATH	Q9SZQ5	VIP3_ARATH	1.54581e-164
Scaffold	357735-40_2_ORF1	645	>sp|P37707|B2_DAUCA_B2_protein_OS=Daucus_carota_PE=2_SV=1|||3e-24	357735-40_2_ORF1	46 kDa	1	1.42	1	DAC	mapped	D8QXX9	200	D8QXX9_SELML	1.80903e-20	tr|D8QXX9|D8QXX9_SELML	357735-40_2_ORF1	tr|F4IUS3|F4IUS3_ARATH	F4IUS3	F4IUS3_ARATH	1.99932e-42
Scaffold	188230-148_1_ORF2	336	>sp|Q9SYL9|RK13_ARATH_50S_ribosomal_protein_L13,_chloroplastic_OS=Arabidopsis_thaliana_GN=RPL13_PE=1_SV=1|||3e-107	188230-148_1_ORF2 (+1)	30 kDa	1	1.42	1	DAC	mapped	D8SDP4	201	D8SDP4_SELML	4.72708e-69	tr|D8SDP4|D8SDP4_SELML	188230-148_1_ORF2	sp|Q9SYL9|RK13_ARATH	Q9SYL9	RK13_ARATH	4.95259e-104
Scaffold	161615-178_3_ORF1	104	>sp|P42798|R15A1_ARATH_40S_ribosomal_protein_S15a-1_OS=Arabidopsis_thaliana_GN=RPS15AA_PE=2_SV=2|||2e-85	161615-178_3_ORF1 (+1)	17 kDa	1	1.42	1	DAC	notMapped		202				161615-178_3_ORF1	sp|Q9FIH8|SPP_ARATH	Q9FIH8	SPP_ARATH	0
Scaffold	154449-189_6_ORF1	713	no_acceptable_match|||NA	154449-189_6_ORF1	50 kDa	1	1.42	1	DAC	mapped	D8RNN6	203	D8RNN6_SELML	0	tr|D8RNN6|D8RNN6_SELML	154449-189_6_ORF1	sp|Q9SFH9|HEM21_ARATH	Q9SFH9	HEM21_ARATH	0
Scaffold	146996-201_6_ORF2	799	Cluster of >sp|Q9D8W5|PSD12_MOUSE_26S_proteasome_non-ATPase_regulatory_subunit_12_OS=Mus_musculus_GN=Psmd12_PE=1_SV=4|||1e-130 (146996-201_6_ORF2)	146996-201_6_ORF2 [2]	57 kDa	1	1.42	1	DAC	mapped	D8QWN8	204	D8QWN8_SELML	0	tr|D8QWN8|D8QWN8_SELML	146996-201_6_ORF2	tr|F4KFD7|F4KFD7_ARATH	F4KFD7	F4KFD7_ARATH	0
Scaffold	11865-700_2_ORF2	218	>sp|Q9MAP3|RK11_ARATH_50S_ribosomal_protein_L11,_chloroplastic_OS=Arabidopsis_thaliana_GN=RPL11_PE=1_SV=1|||1e-100	11865-700_2_ORF2 (+1)	24 kDa	1	1.42	1	DAC	mapped	D8R6B6	205	D8R6B6_SELML	1.75771e-85	tr|D8R6B6|D8R6B6_SELML	11865-700_2_ORF2	sp|Q9MAP3|RK11_ARATH	Q9MAP3	RK11_ARATH	2.33126e-97
Scaffold	10107-750_2_ORF2	883	Cluster of >sp|Q2NKZ1|TCPH_BOVIN_T-complex_protein_1_subunit_eta_OS=Bos_taurus_GN=CCT7_PE=1_SV=1|||0 (10107-750_2_ORF2)	10107-750_2_ORF2 [4]	64 kDa	1	1.42	1	DAC	mapped	D8R5K9	206	D8R5K9_SELML	0	tr|D8R5K9|D8R5K9_SELML	10107-750_2_ORF2	sp|Q9SF16|TCPH_ARATH	Q9SF16	TCPH_ARATH	0
Scaffold	110645-236_2_ORF2	224	Cluster of >sp|Q9LUQ6|RL192_ARATH_60S_ribosomal_protein_L19-2_OS=Arabidopsis_thaliana_GN=RPL19B_PE=2_SV=1|||4e-122 (110645-236_2_ORF2)	110645-236_2_ORF2 [3]	24 kDa	1	1.39	1	DAC	mapped	D8SK52	207	D8SK52_SELML	5.9409e-102	tr|D8SK52|D8SK52_SELML	110645-236_2_ORF2	sp|Q9LUQ6|RL192_ARATH	Q9LUQ6	RL192_ARATH	5.46168e-119
Scaffold	tr|A9RQ90|A9RQ90_PHYPA	74	Cluster of Predicted protein OS=Physcomitrella patens subsp. patens GN=PHYPADRAFT_204626 PE=4 SV=1 (tr|A9RQ90|A9RQ90_PHYPA)	tr|A9RQ90|A9RQ90_PHYPA [11]	16 kDa	1	1.38	1	DAC	mapped	D8S7K0	208	D8S7K0_SELML	1.06314e-80	tr|D8S7K0|D8S7K0_SELML	tr|A9RQ90|A9RQ90_PHYPA	sp|Q9SGA6|RS191_ARATH	Q9SGA6	RS191_ARATH	1.37348e-77
Scaffold	6899-873_2_ORF2	696	>sp|Q9C5U3|PRS8A_ARATH_26S_protease_regulatory_subunit_8_homolog_A_OS=Arabidopsis_thaliana_GN=RPT6A_PE=2_SV=1|||0	6899-873_2_ORF2	49 kDa	1	1.38	1	DAC	mapped	D8RGS0	209	D8RGS0_SELML	0	tr|D8RGS0|D8RGS0_SELML	6899-873_2_ORF2	sp|Q9C5U3|PRS8A_ARATH	Q9C5U3	PRS8A_ARATH	0
Scaffold	151521-194_4_ORF2	899	Cluster of >sp|B0CFQ6|CH601_ACAM1_60_kDa_chaperonin_1_OS=Acaryochloris_marina_(strain_MBIC_11017)_GN=groL1_PE=3_SV=1|||0 (151521-194_4_ORF2)	151521-194_4_ORF2 [11]	66 kDa	1	1.33	1	DAC	mapped	D8RRA0	210	D8RRA0_SELML	0	tr|D8RRA0|D8RRA0_SELML	151521-194_4_ORF2	sp|P21238|CPNA1_ARATH	P21238	CPNA1_ARATH	0
Scaffold	tr|G7IMN3|G7IMN3_MEDTR	921	Heat shock protein OS=Medicago truncatula GN=MTR_2g032550 PE=3 SV=1	tr|G7IMN3|G7IMN3_MEDTR	68 kDa	1	1.32	1	DAC	mapped	D8SUY5	211	D8SUY5_SELML	0	tr|D8SUY5|D8SUY5_SELML	tr|G7IMN3|G7IMN3_MEDTR	sp|Q9LHA8|MD37C_ARATH	Q9LHA8	MD37C_ARATH	0
Scaffold	tr|A8JCY4|A8JCY4_CHLRE	570	Fructose-bisphosphate aldolase OS=Chlamydomonas reinhardtii GN=FBA1 PE=3 SV=1	tr|A8JCY4|A8JCY4_CHLRE	42 kDa	1	1.32	1	DAC	mapped	D8S4U1	212	D8S4U1_SELML	2.98192e-131	tr|D8S4U1|D8S4U1_SELML	tr|A8JCY4|A8JCY4_CHLRE	sp|Q9LF98|ALFC8_ARATH	Q9LF98	ALFC8_ARATH	9.41498e-139
Scaffold	78074-285_6_ORF2	241	>sp|Q8VY91|RR6_ARATH_30S_ribosomal_protein_S6_alpha,_chloroplastic_OS=Arabidopsis_thaliana_GN=RPS6_PE=1_SV=1|||1e-52	78074-285_6_ORF2	25 kDa	1	1.32	1	DAC	mapped	D8RV12	213	D8RV12_SELML	1.21962e-48	tr|D8RV12|D8RV12_SELML	78074-285_6_ORF2	sp|Q8VY91|RR6_ARATH	Q8VY91	RR6_ARATH	6.86716e-49
Scaffold	555-1993_6_ORF5	99	>sp|Q85FJ9|RK20_ADICA_50S_ribosomal_protein_L20,_chloroplastic_OS=Adiantum_capillus-veneris_GN=rpl20_PE=2_SV=2|||3e-60	555-1993_6_ORF5	17 kDa	1	1.32	1	DAC	mapped	D8QX84	214	D8QX84_SELML	7.75381e-19	tr|D8QX84|D8QX84_SELML	555-1993_6_ORF5	sp|P56794|RK20_ARATH	P56794	RK20_ARATH	2.87372e-33
Scaffold	5-9806_3_ORF3	766	>sp|Q8HB52|PSBC_ABIAL_Photosystem_II_CP43_chlorophyll_apoprotein_OS=Abies_alba_GN=psbC_PE=3_SV=1|||0	5-9806_3_ORF3 (+9)	53 kDa	1	1.32	1	DAC	mapped	C7B2K3	215	C7B2K3_SELML	0	tr|C7B2K3|C7B2K3_SELML	5-9806_3_ORF3	sp|P56778|PSBC_ARATH	P56778	PSBC_ARATH	0
Scaffold	4712-1020_6_ORF2	983	>sp|Q04836|ROC3_ARATH_31_kDa_ribonucleoprotein,_chloroplastic_OS=Arabidopsis_thaliana_GN=RBP31_PE=1_SV=1|||5e-22	4712-1020_6_ORF2	83 kDa	1	1.32	1	DAC	mapped	D8QSR9	216	D8QSR9_SELML	4.09976e-15	tr|D8QSR9|D8QSR9_SELML	4712-1020_6_ORF2	sp|Q04836|CP31A_ARATH	Q04836	CP31A_ARATH	2.38273e-17
Scaffold	40578-399_2_ORF3	72	>sp|Q85FI3|RK22_ADICA_50S_ribosomal_protein_L22,_chloroplastic_OS=Adiantum_capillus-veneris_GN=rpl22_PE=2_SV=2|||1e-64	40578-399_2_ORF3	16 kDa	1	1.32	1	DAC	mapped	C7B2I5	217	C7B2I5_SELML	3.56081e-26	tr|C7B2I5|C7B2I5_SELML	40578-399_2_ORF3	sp|P56795|RK22_ARATH	P56795	RK22_ARATH	2.64171e-32
Scaffold	39629-404_3_ORF2	1088	Cluster of >sp|O67869|CARB1_AQUAE_Carbamoyl-phosphate_synthase_large_chain,_N-terminal_section_OS=Aquifex_aeolicus_(strain_VF5)_GN=carB1_PE=3_SV=1|||0 (39629-404_3_ORF2)	39629-404_3_ORF2 [3]	133 kDa	1	1.32	1	DAC	mapped	D8RF71	218	D8RF71_SELML	0	tr|D8RF71|D8RF71_SELML	39629-404_3_ORF2	sp|Q42601|CARB_ARATH	Q42601	CARB_ARATH	0
Scaffold	34748-430_3_ORF1	267	>sp|Q54760|EFP_SYNE7_Elongation_factor_P_OS=Synechococcus_elongatus_(strain_PCC_7942)_GN=efp_PE=3_SV=1|||1e-90	34748-430_3_ORF1 (+1)	26 kDa	1	1.32	1	DAC	mapped	D8SDY5	219	D8SDY5_SELML	5.71184e-103	tr|D8SDY5|D8SDY5_SELML	34748-430_3_ORF1	tr|Q8VZW6|Q8VZW6_ARATH	Q8VZW6	Q8VZW6_ARATH	6.62497e-101
Scaffold	343634-46_3_ORF2	980	>sp|O82802|SIR1_TOBAC_Sulfite_reductase_1_[ferredoxin],_chloroplastic_OS=Nicotiana_tabacum_GN=SIR1_PE=1_SV=1|||0	343634-46_3_ORF2	82 kDa	1	1.32	1	DAC	notMapped		220				343634-46_3_ORF2	tr|Q93VA8|Q93VA8_ARATH	Q93VA8	Q93VA8_ARATH	3.49519e-70
Scaffold	3146-1200_2_ORF1	985	>sp|Q9SJE1|CHLD_ARATH_Magnesium-chelatase_subunit_ChlD,_chloroplastic_OS=Arabidopsis_thaliana_GN=CHLD_PE=2_SV=3|||0	3146-1200_2_ORF1	84 kDa	1	1.32	1	DAC	mapped	D8RVB1	221	D8RVB1_SELML	0	tr|D8RVB1|D8RVB1_SELML	3146-1200_2_ORF1	sp|Q9SJE1|CHLD_ARATH	Q9SJE1	CHLD_ARATH	1.52987e-178
Scaffold	233763-111_2_ORF2	539	Cluster of >sp|O23016|KCAB_ARATH_Probable_voltage-gated_potassium_channel_subunit_beta_OS=Arabidopsis_thaliana_GN=KAB1_PE=1_SV=1|||0 (233763-111_2_ORF2)	233763-111_2_ORF2 [4]	40 kDa	1	1.32	1	DAC	mapped	D8RAQ6	222	D8RAQ6_SELML	0	tr|D8RAQ6|D8RAQ6_SELML	233763-111_2_ORF2	sp|O23016|KCAB_ARATH	O23016	KCAB_ARATH	0
Scaffold	232284-112_3_ORF2	896	>sp|P37107|SR54C_ARATH_Signal_recognition_particle_54_kDa_protein,_chloroplastic_OS=Arabidopsis_thaliana_GN=FFC_PE=1_SV=1|||0	232284-112_3_ORF2 (+1)	66 kDa	1	1.32	1	DAC	mapped	D8QZ73	223	D8QZ73_SELML	0	tr|D8QZ73|D8QZ73_SELML	232284-112_3_ORF2	sp|P37107|SR54C_ARATH	P37107	SR54C_ARATH	0
Scaffold	207675-131_6_ORF2	589	>sp|Q9UQ80|PA2G4_HUMAN_Proliferation-associated_protein_2G4_OS=Homo_sapiens_GN=PA2G4_PE=1_SV=3|||1e-116	207675-131_6_ORF2	43 kDa	1	1.32	1	DAC	mapped	D8SXZ2	224	D8SXZ2_SELML	0	tr|D8SXZ2|D8SXZ2_SELML	207675-131_6_ORF2	sp|Q96327|EBP1_ARATH	Q96327	EBP1_ARATH	0
Scaffold	206877-132_3_ORF2	930	>sp|Q9SSK1|SYNC3_ARATH_Asparagine--tRNA_ligase,_cytoplasmic_3_OS=Arabidopsis_thaliana_GN=SYNC3_PE=2_SV=1|||0	206877-132_3_ORF2	70 kDa	1	1.32	1	DAC	mapped	D8S5M5	225	D8S5M5_SELML	9.04606e-176	tr|D8S5M5|D8S5M5_SELML	206877-132_3_ORF2	tr|A0A1P8B3X2|A0A1P8B3X2_ARATH	A0A1P8B3X2	A0A1P8B3X2_ARATH	0
Scaffold	169602-167_5_ORF2	262	>sp|A1RWR7|RL18_THEPD_50S_ribosomal_protein_L18P_OS=Thermofilum_pendens_(strain_Hrk_5)_GN=rpl18p_PE=3_SV=1|||3e-06	169602-167_5_ORF2	26 kDa	1	1.32	1	DAC	notMapped		226				169602-167_5_ORF2	noOrthologue	noOrthologue	noOrthologue	notMapped
Scaffold	157336-184_3_ORF2	612	Cluster of >sp|P48386|CHS1_CAMSI_Chalcone_synthase_1_OS=Camellia_sinensis_GN=CHS1_PE=2_SV=1|||0 (157336-184_3_ORF2)	157336-184_3_ORF2 [4]	44 kDa	1	1.32	1	DAC	notMapped		227				157336-184_3_ORF2	sp|Q9ZNV9|AHP1_ARATH	Q9ZNV9	AHP1_ARATH	5.84511e-55
Scaffold	157135-184_6_ORF2	115	>sp|Q9ZNV9|AHP1_ARATH_Histidine-containing_phosphotransfer_protein_1_OS=Arabidopsis_thaliana_GN=AHP1_PE=1_SV=1|||7e-59	157135-184_6_ORF2 (+1)	18 kDa	1	1.32	1	DAC	mapped	D8R529	228	D8R529_SELML	4.881e-69	tr|D8R529|D8R529_SELML	157135-184_6_ORF2	sp|Q9ZNV9|AHP1_ARATH	Q9ZNV9	AHP1_ARATH	3.14477e-55
Scaffold	15695-618_5_ORF2	454	>sp|Q9LZS7|GDL71_ARATH_GDSL_esterase/lipase_At5g03610_OS=Arabidopsis_thaliana_GN=At5g03610_PE=2_SV=1|||4e-56	15695-618_5_ORF2	35 kDa	1	1.32	1	DAC	mapped	D8QRB5	229	D8QRB5_SELML	4.60016e-22	tr|D8QRB5|D8QRB5_SELML	15695-618_5_ORF2	sp|Q9LZS7|GDL71_ARATH	Q9LZS7	GDL71_ARATH	1.23766e-52
Scaffold	130238-215_1_ORF2	775	>sp|Q09146|HBA1_SCHPO_Brefeldin_A_resistance_protein_OS=Schizosaccharomyces_pombe_(strain_972_/_ATCC_24843)_GN=hba1_PE=1_SV=1|||1e-17	130238-215_1_ORF2	54 kDa	1	1.32	1	DAC	mapped	D8SI35	230	D8SI35_SELML	4.81606e-35	tr|D8SI35|D8SI35_SELML	130238-215_1_ORF2	sp|Q9C829|NU50A_ARATH	Q9C829	NU50A_ARATH	2.67424e-49
Scaffold	258513-94_2_ORF1	310	Cluster of >sp|Q9FKC0|R13A4_ARATH_60S_ribosomal_protein_L13a-4_OS=Arabidopsis_thaliana_GN=RPL13AD_PE=2_SV=1|||7e-127 (258513-94_2_ORF1)	258513-94_2_ORF1 [4]	28 kDa	1	1.29	1	DAC	mapped	D8QZG6	231	D8QZG6_SELML	4.29555e-124	tr|D8QZG6|D8QZG6_SELML	258513-94_2_ORF1	sp|Q9FKC0|R13A4_ARATH	Q9FKC0	R13A4_ARATH	1.01382e-123
Scaffold	tr|D8RFQ9|D8RFQ9_SELML	670	Cluster of Putative uncharacterized protein OS=Selaginella moellendorffii GN=SELMODRAFT_146742 PE=3 SV=1 (tr|D8RFQ9|D8RFQ9_SELML)	tr|D8RFQ9|D8RFQ9_SELML [6]	48 kDa	1	1.28	1	DAC	mapped	D8RFQ9	232	D8RFQ9_SELML	0	tr|D8RFQ9|D8RFQ9_SELML	tr|D8RFQ9|D8RFQ9_SELML	sp|Q9SSB5|PRS7A_ARATH	Q9SSB5	PRS7A_ARATH	0
Scaffold	81917-278_4_ORF2	748	Cluster of >sp|Q1RJT3|ODP2_RICBR_Dihydrolipoyllysine-residue_acetyltransferase_component_of_pyruvate_dehydrogenase_complex_OS=Rickettsia_bellii_(strain_RML369-C)_GN=pdhC_PE=3_SV=1|||2e-74 (81917-278_4_ORF2)	81917-278_4_ORF2 [3]	52 kDa	1	1.28	1	DAC	mapped	D8QPY3	233	D8QPY3_SELML	0	tr|D8QPY3|D8QPY3_SELML	81917-278_4_ORF2	sp|Q9SQI8|ODP24_ARATH	Q9SQI8	ODP24_ARATH	0
Scaffold	tr|D8RV35|D8RV35_SELML	938	Cluster of Putative uncharacterized protein OS=Selaginella moellendorffii GN=SELMODRAFT_267815 PE=3 SV=1 (tr|D8RV35|D8RV35_SELML)	tr|D8RV35|D8RV35_SELML [12]	71 kDa	1	1.25	1	DAC	mapped	D8RV35	234	D8RV35_SELML	0	tr|D8RV35|D8RV35_SELML	tr|D8RV35|D8RV35_SELML	sp|Q9LTX9|HSP7G_ARATH	Q9LTX9	HSP7G_ARATH	0
Scaffold	sp|P06402|PSBA_MARPO	515	Cluster of Photosystem Q(B) protein OS=Marchantia polymorpha GN=psbA PE=1 SV=1 (sp|P06402|PSBA_MARPO)	sp|P06402|PSBA_MARPO [659]	39 kDa	1	1.22	1	DAC	notMapped		235				sp|P06402|PSBA_MARPO	sp|Q9LRR9|GLO1_ARATH	Q9LRR9	GLO1_ARATH	0
Scaffold	77914-286_1_ORF1	14	>sp|Q9RV58|UB72_DEIRA_Protein_DR_1172_OS=Deinococcus_radiodurans_(strain_ATCC_13939_/_DSM_20539_/_JCM_16871_/_LMG_4051_/_NBRC_15346_/_NCIMB_9279_/_R1_/_VKM_B-1422)_GN=DR_1172_PE=1_SV=1|||3e-09	77914-286_1_ORF1	9 kDa	1	1.22	1	DAC	notMapped		236				77914-286_1_ORF1	noOrthologue	noOrthologue	noOrthologue	notMapped
Scaffold	270250-86_2_ORF1	154	Cluster of >sp|P41128|RL131_BRANA_60S_ribosomal_protein_L13-1_OS=Brassica_napus_PE=2_SV=1|||6e-96 (270250-86_2_ORF1)	270250-86_2_ORF1 [3]	20 kDa	1	1.22	1	DAC	mapped	D8QUC7	237	D8QUC7_SELML	1.26176e-77	tr|D8QUC7|D8QUC7_SELML	270250-86_2_ORF1	sp|P41127|RL131_ARATH	P41127	RL131_ARATH	1.27396e-88
Scaffold	18965-570_4_ORF1	487	>sp|P19682|ROC3_NICSY_28_kDa_ribonucleoprotein,_chloroplastic_OS=Nicotiana_sylvestris_PE=1_SV=1|||5e-33	18965-570_4_ORF1 (+1)	37 kDa	1	1.22	1	DAC	mapped	D8TAY9	238	D8TAY9_SELML	2.08703e-24	tr|D8TAY9|D8TAY9_SELML	18965-570_4_ORF1	sp|Q04836|CP31A_ARATH	Q04836	CP31A_ARATH	6.5158e-28
Scaffold	1892-1420_1_ORF2	1122	Cluster of >sp|Q9TTS3|ACACA_BOVIN_Acetyl-CoA_carboxylase_1_OS=Bos_taurus_GN=ACACA_PE=2_SV=1|||0 (1892-1420_1_ORF2)	1892-1420_1_ORF2 [3]	265 kDa	1	1.22	1	DAC	mapped	D8SWL6	239	D8SWL6_SELML	0	tr|D8SWL6|D8SWL6_SELML	1892-1420_1_ORF2	sp|Q38970|ACC1_ARATH	Q38970	ACC1_ARATH	0
Scaffold	182955-153_2_ORF2	971	>sp|Q9ZPI6|AIM1_ARATH_Peroxisomal_fatty_acid_beta-oxidation_multifunctional_protein_AIM1_OS=Arabidopsis_thaliana_GN=AIM1_PE=1_SV=1|||0	182955-153_2_ORF2	79 kDa	1	1.22	1	DAC	mapped	D8S3X4	240	D8S3X4_SELML	0	tr|D8S3X4|D8S3X4_SELML	182955-153_2_ORF2	sp|Q9ZPI5|MFP2_ARATH	Q9ZPI5	MFP2_ARATH	0
Scaffold	165151-173_6_ORF2	689	Cluster of >sp|C0RKC9|HIS1_BRUMB_ATP_phosphoribosyltransferase_OS=Brucella_melitensis_biotype_2_(strain_ATCC_23457)_GN=hisG_PE=3_SV=1|||8e-42 (165151-173_6_ORF2)	165151-173_6_ORF2 [2]	49 kDa	1	1.22	1	DAC	mapped	D8RQF7	241	D8RQF7_SELML	5.15472e-171	tr|D8RQF7|D8RQF7_SELML	165151-173_6_ORF2	sp|Q8GSJ1|HIS1B_ARATH	Q8GSJ1	HIS1B_ARATH	1.4636e-169
Scaffold	164492-174_2_ORF1	203	no_acceptable_match|||NA	164492-174_2_ORF1 (+2)	23 kDa	1	1.22	1	DAC	notMapped		242				164492-174_2_ORF1	noOrthologue	noOrthologue	noOrthologue	notMapped
Scaffold	425010-9_5_ORF2	995	Cluster of >sp|A5G0M4|METE_ACICJ_5-methyltetrahydropteroyltriglutamate--homocysteine_methyltransferase_OS=Acidiphilium_cryptum_(strain_JF-5)_GN=metE_PE=3_SV=1|||0 (425010-9_5_ORF2)	425010-9_5_ORF2 [2]	86 kDa	1	1.21	1	DAC	mapped	D8TCH7	243	D8TCH7_SELML	0	tr|D8TCH7|D8TCH7_SELML	425010-9_5_ORF2	sp|O50008|METE1_ARATH	O50008	METE1_ARATH	0
Scaffold	156828-185_3_ORF2	260	Cluster of >sp|O65731|RS5_CICAR_40S_ribosomal_protein_S5_(Fragment)_OS=Cicer_arietinum_GN=RPS5_PE=2_SV=1|||9e-133 (156828-185_3_ORF2)	156828-185_3_ORF2 [9]	26 kDa	1	1.19	1	DAC	mapped	D8QTD1	244	D8QTD1_SELML	1.72133e-124	tr|D8QTD1|D8QTD1_SELML	156828-185_3_ORF2	sp|P51427|RS52_ARATH	P51427	RS52_ARATH	3.13715e-128
Scaffold	116302-230_4_ORF2	891	>sp|Q8VX13|PDI13_ARATH_Protein_disulfide_isomerase-like_1-3_OS=Arabidopsis_thaliana_GN=PDIL1-3_PE=2_SV=1|||0	116302-230_4_ORF2	65 kDa	1	1.19	1	DAC	mapped	D8SJJ7	245	D8SJJ7_SELML	0	tr|D8SJJ7|D8SJJ7_SELML	116302-230_4_ORF2	sp|Q9FF55|PDI14_ARATH	Q9FF55	PDI14_ARATH	0
Scaffold	2029-1386_2_ORF2	765	>sp|P42799|GSA1_ARATH_Glutamate-1-semialdehyde_2,1-aminomutase_1,_chloroplastic_OS=Arabidopsis_thaliana_GN=GSA1_PE=1_SV=1|||0	2029-1386_2_ORF2	53 kDa	1	1.18	1	DAC	mapped	D8SW39	246	D8SW39_SELML	0	tr|D8SW39|D8SW39_SELML	2029-1386_2_ORF2	sp|Q42522|GSA2_ARATH	Q42522	GSA2_ARATH	0
Scaffold	370264-35_6_ORF1	727	>sp|Q8C2Q3|RBM14_MOUSE_RNA-binding_protein_14_OS=Mus_musculus_GN=Rbm14_PE=1_SV=1|||2e-07	370264-35_6_ORF1 (+1)	51 kDa	1	1.17	1	DAC	notMapped		247				370264-35_6_ORF1	noOrthologue	noOrthologue	noOrthologue	notMapped
Scaffold	359046-40_1_ORF1	562	>sp|Q9XGV9|COMT2_OCIBA_Caffeic_acid_3-O-methyltransferase_2_OS=Ocimum_basilicum_GN=COMT2_PE=2_SV=1|||2e-106	359046-40_1_ORF1	42 kDa	1	1.17	1	DAC	mapped	D8QX33	248	D8QX33_SELML	1.05537e-97	tr|D8QX33|D8QX33_SELML	359046-40_1_ORF1	sp|Q9FK25|OMT1_ARATH	Q9FK25	OMT1_ARATH	1.75269e-102
Scaffold	311663-62_4_ORF2	701	>sp|P29344|RR1_SPIOL_30S_ribosomal_protein_S1,_chloroplastic_OS=Spinacia_oleracea_GN=RPS1_PE=1_SV=1|||1e-157	311663-62_4_ORF2 (+3)	49 kDa	1	1.17	1	DAC	mapped	D8RQA0	249	D8RQA0_SELML	9.33197e-131	tr|D8RQA0|D8RQA0_SELML	311663-62_4_ORF2	sp|Q93VC7|RPS1_ARATH	Q93VC7	RPS1_ARATH	9.82387e-151
Scaffold	295392-71_1_ORF1	768	Cluster of >sp|B0CD21|DXR_ACAM1_1-deoxy-D-xylulose_5-phosphate_reductoisomerase_OS=Acaryochloris_marina_(strain_MBIC_11017)_GN=dxr_PE=3_SV=1|||0 (295392-71_1_ORF1)	295392-71_1_ORF1 [3]	54 kDa	1	1.17	1	DAC	mapped	D8T2C2	250	D8T2C2_SELML	0	tr|D8T2C2|D8T2C2_SELML	295392-71_1_ORF1	sp|Q9XFS9|DXR_ARATH	Q9XFS9	DXR_ARATH	0
Scaffold	20470-551_2_ORF1	35	>sp|P49317|CATA3_NICPL_Catalase_isozyme_3_OS=Nicotiana_plumbaginifolia_GN=CAT3_PE=2_SV=1|||3e-59	20470-551_2_ORF1	13 kDa	1	1.17	1	DAC	mapped	D8QT27	251	D8QT27_SELML	1.56461e-55	tr|D8QT27|D8QT27_SELML	20470-551_2_ORF1	tr|A0A1P8B564|A0A1P8B564_ARATH	A0A1P8B564	A0A1P8B564_ARATH	1.35118e-49
Scaffold	15784-616_1_ORF1	1065	Cluster of >sp|Q5F418|PSMD1_CHICK_26S_proteasome_non-ATPase_regulatory_subunit_1_OS=Gallus_gallus_GN=PSMD1_PE=2_SV=1|||0 (15784-616_1_ORF1)	15784-616_1_ORF1 [4]	112 kDa	1	1.17	1	DAC	mapped	D8SIA7	252	D8SIA7_SELML	0	tr|D8SIA7|D8SIA7_SELML	15784-616_1_ORF1	sp|O48844|PSD1A_ARATH	O48844	PSD1A_ARATH	0
Scaffold	155268-187_1_ORF2	382	>sp|P19954|PRSP1_SPIOL_Ribosome-binding_factor_PSRP1,_chloroplastic_OS=Spinacia_oleracea_GN=PSRP1_PE=1_SV=2|||1e-84	155268-187_1_ORF2	32 kDa	1	1.17	1	DAC	mapped	D8RXJ5	253	D8RXJ5_SELML	1.36587e-99	tr|D8RXJ5|D8RXJ5_SELML	155268-187_1_ORF2	tr|Q94K97|Q94K97_ARATH	Q94K97	Q94K97_ARATH	2.45744e-82
Scaffold	tr|A9SET2|A9SET2_PHYPA	129	Peptidyl-prolyl cis-trans isomerase OS=Physcomitrella patens subsp. patens GN=PHYPADRAFT_232260 PE=3 SV=1	tr|A9SET2|A9SET2_PHYPA	18 kDa	1	1.15	1	DAC	mapped	D8QXE2	254	D8QXE2_SELML	8.49379e-93	tr|D8QXE2|D8QXE2_SELML	tr|A9SET2|A9SET2_PHYPA	sp|Q9SKQ0|CP19B_ARATH	Q9SKQ0	CP19B_ARATH	2.23601e-90
Scaffold	317210-59_1_ORF1	18	>sp|P93354|H2B_TOBAC_Histone_H2B_OS=Nicotiana_tabacum_GN=HIS2B_PE=2_SV=3|||2e-30	317210-59_1_ORF1 (+1)	10 kDa	1	1.15	1	DAC	mapped	D8SSH2	255	D8SSH2_SELML	3.20477e-27	tr|D8SSH2|D8SSH2_SELML	317210-59_1_ORF1	sp|O23629|H2B6_ARATH	O23629	H2B6_ARATH	1.78341e-25
Scaffold	219069-122_1_ORF2	595	>sp|Q7Z9I4|YCP6_SCHPO_Uncharacterized_oxidoreductase_C663.06c_OS=Schizosaccharomyces_pombe_(strain_972_/_ATCC_24843)_GN=SPCC663.06c_PE=2_SV=1|||5e-27	219069-122_1_ORF2	43 kDa	1	1.14	1	DAC	mapped	D8RF44	256	D8RF44_SELML	3.55777e-96	tr|D8RF44|D8RF44_SELML	219069-122_1_ORF2	tr|Q941A7|Q941A7_ARATH	Q941A7	Q941A7_ARATH	6.82806e-100
Scaffold	40578-399_2_ORF2	362	Cluster of >sp|A2T375|RK2_ANGEV_50S_ribosomal_protein_L2,_chloroplastic_OS=Angiopteris_evecta_GN=rpl2_PE=3_SV=1|||4e-147 (40578-399_2_ORF2)	40578-399_2_ORF2 [4]	31 kDa	1	1.13	1	DAC	mapped	D8TEA9	257	D8TEA9_SELML	1.41388e-116	tr|D8TEA9|D8TEA9_SELML	40578-399_2_ORF2	sp|P56791|RK2_ARATH	P56791	RK2_ARATH	3.07358e-122
Scaffold	30870-456_5_ORF1	904	Cluster of >sp|B0CFQ6|CH601_ACAM1_60_kDa_chaperonin_1_OS=Acaryochloris_marina_(strain_MBIC_11017)_GN=groL1_PE=3_SV=1|||0 (30870-456_5_ORF1)	30870-456_5_ORF1 [16]	66 kDa	1	1.13	1	DAC	mapped	D8SG19	258	D8SG19_SELML	0	tr|D8SG19|D8SG19_SELML	30870-456_5_ORF1	sp|P21240|CPNB1_ARATH	P21240	CPNB1_ARATH	0
Scaffold	307639-64_3_ORF2	1015	Cluster of >sp|Q9STX5|ENPL_ARATH_Endoplasmin_homolog_OS=Arabidopsis_thaliana_GN=SHD_PE=1_SV=1|||0 (307639-64_3_ORF2)	307639-64_3_ORF2 [5]	92 kDa	1	1.09	1	DAC	notMapped		259				307639-64_3_ORF2	sp|Q8RY24|SPSA3_ARATH	Q8RY24	SPSA3_ARATH	0
Scaffold	170211-166_2_ORF2	84	>sp|P29185|CH61_MAIZE_Chaperonin_CPN60-1,_mitochondrial_OS=Zea_mays_GN=CPN60I_PE=1_SV=2|||7e-71	170211-166_2_ORF2 (+2)	16 kDa	1	1.09	1	DAC	mapped	D8S490	260	D8S490_SELML	2.02303e-66	tr|D8S490|D8S490_SELML	170211-166_2_ORF2	sp|Q8L7B5|CH60B_ARATH	Q8L7B5	CH60B_ARATH	2.47002e-67
Scaffold	224640-117_6_ORF2	893	Cluster of >sp|Q05758|ILV5_ARATH_Ketol-acid_reductoisomerase,_chloroplastic_OS=Arabidopsis_thaliana_GN=At3g58610_PE=2_SV=2|||0 (224640-117_6_ORF2)	224640-117_6_ORF2 [3]	65 kDa	1	1.07	1	DAC	mapped	D8SSR5	261	D8SSR5_SELML	0	tr|D8SSR5|D8SSR5_SELML	224640-117_6_ORF2	sp|Q05758|ILV5_ARATH	Q05758	ILV5_ARATH	0
Scaffold	20165-555_5_ORF2	719	>sp|P37707|B2_DAUCA_B2_protein_OS=Daucus_carota_PE=2_SV=1|||1e-25	20165-555_5_ORF2	50 kDa	1	1.06	1	DAC	mapped	D8QXX9	262	D8QXX9_SELML	7.65342e-22	tr|D8QXX9|D8QXX9_SELML	20165-555_5_ORF2	tr|F4IUS3|F4IUS3_ARATH	F4IUS3	F4IUS3_ARATH	1.31324e-39
Scaffold	tr|D8S490|D8S490_SELML	838	Cluster of Putative uncharacterized protein (Fragment) OS=Selaginella moellendorffii GN=SELMODRAFT_108429 PE=3 SV=1 (tr|D8S490|D8S490_SELML)	tr|D8S490|D8S490_SELML [13]	59 kDa	1	1.05	1	DAC	mapped	D8S490	263	D8S490_SELML	0	tr|D8S490|D8S490_SELML	tr|D8S490|D8S490_SELML	sp|P29197|CH60A_ARATH	P29197	CH60A_ARATH	0
Scaffold	tr|A9RI12|A9RI12_PHYPA	10	Cluster of 40S ribosomal protein S21 OS=Physcomitrella patens subsp. patens GN=PHYPADRAFT_55336 PE=3 SV=1 (tr|A9RI12|A9RI12_PHYPA)	tr|A9RI12|A9RI12_PHYPA [5]	9 kDa	1	1.04	1	DAC	mapped	D8RRX8	264	D8RRX8_SELML	7.45383e-48	tr|D8RRX8|D8RRX8_SELML	tr|A9RI12|A9RI12_PHYPA	sp|Q3E902|RS212_ARATH	Q3E902	RS212_ARATH	1.07429e-46
Scaffold	tr|A9S713|A9S713_PHYPA	342	Proteasome subunit beta type OS=Physcomitrella patens subsp. patens GN=PHYPADRAFT_163186 PE=3 SV=1	tr|A9S713|A9S713_PHYPA (+1)	30 kDa	1	1	1	DAC	mapped	D8RRN5	265	D8RRN5_SELML	1.61806e-148	tr|D8RRN5|D8RRN5_SELML	tr|A9S713|A9S713_PHYPA	sp|Q7DLS1|PSB7B_ARATH	Q7DLS1	PSB7B_ARATH	4.57882e-156
Scaffold	sp|Q38946|DHE2_ARATH	619	Cluster of Glutamate dehydrogenase 2 OS=Arabidopsis thaliana GN=GDH2 PE=1 SV=1 (sp|Q38946|DHE2_ARATH)	sp|Q38946|DHE2_ARATH [5]	45 kDa	1	1	1	DAC	mapped	D8TB19	266	D8TB19_SELML	0	tr|D8TB19|D8TB19_SELML	sp|Q38946|DHE2_ARATH	sp|Q38946|DHE2_ARATH	Q38946	DHE2_ARATH	0
Scaffold	rr|REV_A4QL79|REV_YCF1_DRANE	1114	Putative membrane protein ycf1 OS=Draba nemorosa GN=ycf1-A PE=3 SV=1	rr|REV_A4QL79|REV_YCF1_DRANE	213 kDa	1	1	1	DAC	notMapped		267				rr|REV_A4QL79|REV_YCF1_DRANE	tr|Q9SKZ0|Q9SKZ0_ARATH	Q9SKZ0	Q9SKZ0_ARATH	4.18317e-48
Scaffold	8983-789_2_ORF1	319	>sp|P32289|GLNA_VIGAC_Glutamine_synthetase_nodule_isozyme_OS=Vigna_aconitifolia_PE=2_SV=1|||2e-170	8983-789_2_ORF1	29 kDa	1	1	1	DAC	mapped	D8S2L6	268	D8S2L6_SELML	3.32909e-167	tr|D8S2L6|D8S2L6_SELML	8983-789_2_ORF1	sp|Q9FMD9|GLN14_ARATH	Q9FMD9	GLN14_ARATH	6.48553e-167
Scaffold	8592-803_5_ORF2	170	>sp|Q9FUL4|RL24_PRUAV_60S_ribosomal_protein_L24_OS=Prunus_avium_GN=RPL24_PE=2_SV=1|||2e-85	8592-803_5_ORF2	21 kDa	1	1	1	DAC	mapped	D8QZE9	269	D8QZE9_SELML	4.72284e-71	tr|D8QZE9|D8QZE9_SELML	8592-803_5_ORF2	sp|Q42347|RL241_ARATH	Q42347	RL241_ARATH	6.11258e-76
Scaffold	8377-812_1_ORF2	605	Cluster of >sp|Q9XJ35|CLPR1_ARATH_ATP-dependent_Clp_protease_proteolytic_subunit-related_protein_1,_chloroplastic_OS=Arabidopsis_thaliana_GN=CLPR1_PE=1_SV=1|||4e-163 (8377-812_1_ORF2)	8377-812_1_ORF2 [4]	44 kDa	1	1	1	DAC	mapped	D8SPE0	270	D8SPE0_SELML	1.03136e-169	tr|D8SPE0|D8SPE0_SELML	8377-812_1_ORF2	sp|Q9XJ35|CLPR1_ARATH	Q9XJ35	CLPR1_ARATH	2.64094e-160
Scaffold	7484-847_3_ORF2	404	>sp|Q8CGC7|SYEP_MOUSE_Bifunctional_glutamate/proline--tRNA_ligase_OS=Mus_musculus_GN=Eprs_PE=1_SV=4|||6e-120	7484-847_3_ORF2 (+1)	33 kDa	1	1	1	DAC	notMapped		271				7484-847_3_ORF2	noOrthologue	noOrthologue	noOrthologue	notMapped
Scaffold	71631-298_5_ORF2	509	>sp|Q04836|ROC3_ARATH_31_kDa_ribonucleoprotein,_chloroplastic_OS=Arabidopsis_thaliana_GN=RBP31_PE=1_SV=1|||2e-29	71631-298_5_ORF2	39 kDa	1	1	1	DAC	mapped	D8TAY9	272	D8TAY9_SELML	8.47146e-21	tr|D8TAY9|D8TAY9_SELML	71631-298_5_ORF2	sp|Q04836|CP31A_ARATH	Q04836	CP31A_ARATH	8.38336e-25
Scaffold	66865-309_2_ORF2	597	>sp|Q5ZLF0|F10A1_CHICK_Hsc70-interacting_protein_OS=Gallus_gallus_GN=ST13_PE=2_SV=1|||8e-114	66865-309_2_ORF2	43 kDa	1	1	1	DAC	mapped	D8RQX3	273	D8RQX3_SELML	1.27998e-113	tr|D8RQX3|D8RQX3_SELML	66865-309_2_ORF2	sp|Q8VWG7|TDX_ARATH	Q8VWG7	TDX_ARATH	6.69911e-95
Scaffold	62966-319_5_ORF2	861	Cluster of >sp|P40412|TCPE1_AVESA_T-complex_protein_1_subunit_epsilon_OS=Avena_sativa_PE=2_SV=1|||0 (62966-319_5_ORF2)	62966-319_5_ORF2 [2]	62 kDa	1	1	1	DAC	mapped	D8T0P7	274	D8T0P7_SELML	0	tr|D8T0P7|D8T0P7_SELML	62966-319_5_ORF2	sp|O04450|TCPE_ARATH	O04450	TCPE_ARATH	0
Scaffold	43286-387_3_ORF1	325	no_acceptable_match|||NA	43286-387_3_ORF1 (+68)	29 kDa	1	1	1	DAC	mapped	D8RMS2	275	D8RMS2_SELML	2.92653e-147	tr|D8RMS2|D8RMS2_SELML	43286-387_3_ORF1	sp|Q8H156|RAN3_ARATH	Q8H156	RAN3_ARATH	1.89123e-157
Scaffold	41085-397_6_ORF1	467	>sp|Q2S8R2|KGUA_HAHCH_Guanylate_kinase_OS=Hahella_chejuensis_(strain_KCTC_2396)_GN=gmk_PE=3_SV=1|||4e-07	41085-397_6_ORF1	36 kDa	1	1	1	DAC	notMapped		276				41085-397_6_ORF1	noOrthologue	noOrthologue	noOrthologue	notMapped
Scaffold	3922-1092_3_ORF2	771	>sp|Q42884|AROC1_SOLLC_Chorismate_synthase_1,_chloroplastic_OS=Solanum_lycopersicum_GN=CS1_PE=2_SV=1|||0	3922-1092_3_ORF2 (+1)	54 kDa	1	1	1	DAC	mapped	D8RQP2	277	D8RQP2_SELML	0	tr|D8RQP2|D8RQP2_SELML	3922-1092_3_ORF2	sp|P57720|AROC_ARATH	P57720	AROC_ARATH	0
Scaffold	36575-419_4_ORF2	193	>sp|Q9SVM8|GRP2_ARATH_Glycine-rich_RNA-binding_protein_2,_mitochondrial_OS=Arabidopsis_thaliana_GN=GRP2_PE=1_SV=1|||3e-29	36575-419_4_ORF2 (+3)	22 kDa	1	1	1	DAC	notMapped		278				36575-419_4_ORF2	noOrthologue	noOrthologue	noOrthologue	notMapped
Scaffold	307371-64_4_ORF2	510	>sp|Q54LT8|STRAP_DICDI_Serine-threonine_kinase_receptor-associated_protein_OS=Dictyostelium_discoideum_GN=strap_PE=3_SV=1|||3e-110	307371-64_4_ORF2	39 kDa	1	1	1	DAC	mapped	D8S1P0	279	D8S1P0_SELML	0	tr|D8S1P0|D8S1P0_SELML	307371-64_4_ORF2	tr|Q9LW17|Q9LW17_ARATH	Q9LW17	Q9LW17_ARATH	8.75465e-176
Scaffold	269478-87_2_ORF1	553	>sp|Q9SGS4|CDSP_ARATH_Thioredoxin-like_protein_CDSP32,_chloroplastic_OS=Arabidopsis_thaliana_GN=CDSP32_PE=1_SV=1|||2e-112	269478-87_2_ORF1 (+1)	41 kDa	1	1	1	DAC	mapped	D8T1R0	280	D8T1R0_SELML	7.31542e-106	tr|D8T1R0|D8T1R0_SELML	269478-87_2_ORF1	sp|Q9SGS4|CDSP_ARATH	Q9SGS4	CDSP_ARATH	2.80557e-109
Scaffold	262790-91_4_ORF1	49	>sp|A2XZN0|H2A6_ORYSI_Probable_histone_H2A.6_OS=Oryza_sativa_subsp._indica_GN=OsI_017523_PE=3_SV=2|||1e-68	262790-91_4_ORF1	13 kDa	1	1	1	DAC	mapped	D8QTE4	281	D8QTE4_SELML	8.90527e-63	tr|D8QTE4|D8QTE4_SELML	262790-91_4_ORF1	sp|Q9FJE8|H2A7_ARATH	Q9FJE8	H2A7_ARATH	2.85931e-63
Scaffold	2553-1279_6_ORF1	679	Cluster of >sp|P25697|KPPR_ARATH_Phosphoribulokinase,_chloroplastic_OS=Arabidopsis_thaliana_GN=At1g32060_PE=1_SV=1|||0 (2553-1279_6_ORF1)	2553-1279_6_ORF1 [5]	48 kDa	1	1	1	DAC	mapped	D8SU48	282	D8SU48_SELML	0	tr|D8SU48|D8SU48_SELML	2553-1279_6_ORF1	sp|P25697|KPPR_ARATH	P25697	KPPR_ARATH	0
Scaffold	25450-498_6_ORF2	372	Cluster of >sp|O04331|PHB3_ARATH_Prohibitin-3,_mitochondrial_OS=Arabidopsis_thaliana_GN=PHB3_PE=1_SV=1|||2e-150 (25450-498_6_ORF2)	25450-498_6_ORF2 [5]	31 kDa	1	1	1	DAC	mapped	D8QQF5	283	D8QQF5_SELML	1.68918e-147	tr|D8QQF5|D8QQF5_SELML	25450-498_6_ORF2	sp|O04331|PHB3_ARATH	O04331	PHB3_ARATH	1.65935e-147
Scaffold	243793-104_3_ORF2	513	Cluster of >sp|Q9LY66|RK1_ARATH_50S_ribosomal_protein_L1,_chloroplastic_OS=Arabidopsis_thaliana_GN=RPL1_PE=1_SV=1|||1e-134 (243793-104_3_ORF2)	243793-104_3_ORF2 [3]	39 kDa	1	1	1	DAC	mapped	D8R103	284	D8R103_SELML	1.55694e-134	tr|D8R103|D8R103_SELML	243793-104_3_ORF2	sp|Q9LY66|RK1_ARATH	Q9LY66	RK1_ARATH	9.84859e-132
Scaffold	24167-510_3_ORF1	391	>sp|Q941Q3|C3H37_ARATH_Zinc_finger_CCCH_domain-containing_protein_37_OS=Arabidopsis_thaliana_GN=HUA1_PE=1_SV=1|||7e-73	24167-510_3_ORF1 (+1)	32 kDa	1	1	1	DAC	notMapped		285				24167-510_3_ORF1	sp|Q8S9M1|PAP13_ARATH	Q8S9M1	PAP13_ARATH	2.0156e-94
Scaffold	239245-107_3_ORF2	902	>sp|Q10ND7|LAC10_ORYSJ_Laccase-10_OS=Oryza_sativa_subsp._japonica_GN=LAC10_PE=2_SV=1|||0	239245-107_3_ORF2 (+3)	66 kDa	1	1	1	DAC	mapped	D8T7R1	286	D8T7R1_SELML	0	tr|D8T7R1|D8T7R1_SELML	239245-107_3_ORF2	tr|A0A1P8BAQ4|A0A1P8BAQ4_ARATH	A0A1P8BAQ4	A0A1P8BAQ4_ARATH	0
Scaffold	229414-114_3_ORF1	918	>sp|O04130|SERA_ARATH_D-3-phosphoglycerate_dehydrogenase,_chloroplastic_OS=Arabidopsis_thaliana_GN=At1g17745_PE=1_SV=2|||0	229414-114_3_ORF1	68 kDa	1	1	1	DAC	mapped	D8RVU4	287	D8RVU4_SELML	0	tr|D8RVU4|D8RVU4_SELML	229414-114_3_ORF1	sp|O49485|SERA1_ARATH	O49485	SERA1_ARATH	0
Scaffold	212077-127_1_ORF1	886	>sp|P58223|Y4837_ARATH_KH_domain-containing_protein_At4g18375_OS=Arabidopsis_thaliana_GN=At4g18375_PE=2_SV=1|||5e-54	212077-127_1_ORF1 (+1)	65 kDa	1	1	1	DAC	notMapped		288				212077-127_1_ORF1	sp|F4I116|SYLC_ARATH	F4I116	SYLC_ARATH	0
Scaffold	19781-560_4_ORF2	397	>sp|P24314|PCNA_CATRO_Proliferating_cell_nuclear_antigen_OS=Catharanthus_roseus_PE=2_SV=1|||0	19781-560_4_ORF2	32 kDa	1	1	1	DAC	mapped	D8S0X2	289	D8S0X2_SELML	1.34716e-167	tr|D8S0X2|D8S0X2_SELML	19781-560_4_ORF2	sp|Q9M7Q7|PCNA1_ARATH	Q9M7Q7	PCNA1_ARATH	2.45396e-175
Scaffold	16884-601_6_ORF1	145	>sp|Q5N376|Y1054_SYNP6_Nucleoid-associated_protein_syc1054_d_OS=Synechococcus_sp._(strain_ATCC_27144_/_PCC_6301_/_SAUG_1402/1)_GN=syc1054_d_PE=3_SV=1|||1e-26	16884-601_6_ORF1	20 kDa	1	1	1	DAC	mapped	D8QSN0	290	D8QSN0_SELML	9.12122e-64	tr|D8QSN0|D8QSN0_SELML	16884-601_6_ORF1	sp|O82230|EBFC2_ARATH	O82230	EBFC2_ARATH	7.88432e-68
Scaffold	1466-1535_4_ORF1	740	Cluster of >sp|Q9SZX3|ASSY_ARATH_Argininosuccinate_synthase,_chloroplastic_OS=Arabidopsis_thaliana_GN=At4g24830_PE=2_SV=3|||0 (1466-1535_4_ORF1)	1466-1535_4_ORF1 [4]	52 kDa	1	1	1	DAC	mapped	D8RWH5	291	D8RWH5_SELML	0	tr|D8RWH5|D8RWH5_SELML	1466-1535_4_ORF1	sp|Q9SZX3|ASSY_ARATH	Q9SZX3	ASSY_ARATH	0
Scaffold	14384-638_2_ORF2	222	>sp|P25864|RK9_ARATH_50S_ribosomal_protein_L9,_chloroplastic_OS=Arabidopsis_thaliana_GN=RPL9_PE=1_SV=1|||1e-66	14384-638_2_ORF2	24 kDa	1	1	1	DAC	mapped	D8RC52	292	D8RC52_SELML	2.33852e-61	tr|D8RC52|D8RC52_SELML	14384-638_2_ORF2	sp|P25864|RK9_ARATH	P25864	RK9_ARATH	4.33383e-63
Scaffold	13850-650_1_ORF3	256	>sp|O23193|CBSX1_ARATH_CBS_domain-containing_protein_CBSX1,_chloroplastic_OS=Arabidopsis_thaliana_GN=CBSX1_PE=1_SV=2|||4e-80	13850-650_1_ORF3 (+1)	26 kDa	1	1	1	DAC	mapped	D8QZL4	293	D8QZL4_SELML	4.47552e-78	tr|D8QZL4|D8QZL4_SELML	13850-650_1_ORF3	sp|O23193|CBSX1_ARATH	O23193	CBSX1_ARATH	1.01218e-76
Scaffold	136876-209_3_ORF2	501	>sp|P43556|RGD2_YEAST_Rho-GTPase-activating_protein_RGD2_OS=Saccharomyces_cerevisiae_(strain_ATCC_204508_/_S288c)_GN=RGD2_PE=1_SV=1|||6e-08	136876-209_3_ORF2	38 kDa	1	1	1	DAC	mapped	D8RWT9	294	D8RWT9_SELML	1.4399e-127	tr|D8RWT9|D8RWT9_SELML	136876-209_3_ORF2	tr|Q9CAC8|Q9CAC8_ARATH	Q9CAC8	Q9CAC8_ARATH	8.6174e-119
Scaffold	13648-655_4_ORF2	638	>sp|A6VLW0|TAL_ACTSZ_Transaldolase_OS=Actinobacillus_succinogenes_(strain_ATCC_55618_/_130Z)_GN=tal_PE=3_SV=1|||5e-64	13648-655_4_ORF2 (+1)	46 kDa	1	1	1	DAC	notMapped		295				13648-655_4_ORF2	tr|Q9FWX0|Q9FWX0_ARATH	Q9FWX0	Q9FWX0_ARATH	2.28346e-167
Scaffold	130267-215_1_ORF2	151	>sp|P13240|DR206_PEA_Disease_resistance_response_protein_206_OS=Pisum_sativum_GN=PI206_PE=2_SV=2|||2e-13	130267-215_1_ORF2	20 kDa	1	1	1	DAC	mapped	D8T7L4	296	D8T7L4_SELML	8.60726e-11	tr|D8T7L4|D8T7L4_SELML	130267-215_1_ORF2	sp|Q84TH6|DIR23_ARATH	Q84TH6	DIR23_ARATH	5.38454e-14
Scaffold	12593-678_5_ORF1	858	>sp|Q9LF46|HACL_ARATH_2-hydroxyacyl-CoA_lyase_OS=Arabidopsis_thaliana_GN=HACL_PE=2_SV=1|||0	12593-678_5_ORF1	62 kDa	1	1	1	DAC	mapped	D8SCU7	297	D8SCU7_SELML	0	tr|D8SCU7|D8SCU7_SELML	12593-678_5_ORF1	sp|Q9LF46|HACL_ARATH	Q9LF46	HACL_ARATH	0
Scaffold	124673-221_2_ORF1	368	>sp|Q8LD27|PSB6_ARATH_Proteasome_subunit_beta_type-6_OS=Arabidopsis_thaliana_GN=PBA1_PE=1_SV=2|||1e-124	124673-221_2_ORF1 (+1)	31 kDa	1	1	1	DAC	mapped	D8RI08	298	D8RI08_SELML	9.82354e-113	tr|D8RI08|D8RI08_SELML	124673-221_2_ORF1	sp|Q8LD27|PSB6_ARATH	Q8LD27	PSB6_ARATH	1.72578e-121
Scaffold	102670-246_5_ORF2	1103	>sp|O50314|BCHH_CHLP8_Magnesium-chelatase_subunit_H_OS=Chlorobaculum_parvum_(strain_NCIB_8327)_GN=bchH_PE=3_SV=2|||0	102670-246_5_ORF2 (+4)	159 kDa	1	1	1	DAC	mapped	D8R4U2	299	D8R4U2_SELML	0	tr|D8R4U2|D8R4U2_SELML	102670-246_5_ORF2	sp|Q9FNB0|CHLH_ARATH	Q9FNB0	CHLH_ARATH	0
Scaffold	96024-255_6_ORF2	762	Cluster of >sp|Q3A9R3|EFTU1_CARHZ_Elongation_factor_Tu_1_OS=Carboxydothermus_hydrogenoformans_(strain_Z-2901_/_DSM_6008)_GN=tuf1_PE=3_SV=1|||0 (96024-255_6_ORF2)	96024-255_6_ORF2 [8]	53 kDa	1	0.98			mapped	D8T8L9	300	D8T8L9_SELML	0	tr|D8T8L9|D8T8L9_SELML	96024-255_6_ORF2	sp|P17745|EFTU_ARATH	P17745	EFTU_ARATH	0
Scaffold	117441-229_6_ORF1	118	Cluster of >sp|Q9LQQ4|H2B1_ARATH_Histone_H2B.1_OS=Arabidopsis_thaliana_GN=At1g07790_PE=1_SV=3|||2e-68 (117441-229_6_ORF1)	117441-229_6_ORF1 [19]	18 kDa	1	0.98			mapped	D8SSH2	301	D8SSH2_SELML	9.44084e-64	tr|D8SSH2|D8SSH2_SELML	117441-229_6_ORF1	sp|Q9LQQ4|H2B1_ARATH	Q9LQQ4	H2B1_ARATH	6.32719e-65
Scaffold	125905-219_3_ORF2	1110	Cluster of >sp|Q03460|GLSN_MEDSA_Glutamate_synthase_[NADH],_amyloplastic_OS=Medicago_sativa_PE=1_SV=1|||0 (125905-219_3_ORF2)	125905-219_3_ORF2 [11]	181 kDa	1	0.96			mapped	D8SHF8	302	D8SHF8_SELML	0	tr|D8SHF8|D8SHF8_SELML	125905-219_3_ORF2	sp|Q9ZNZ7|GLTB1_ARATH	Q9ZNZ7	GLTB1_ARATH	0
Scaffold	146202-202_3_ORF2	909	Cluster of >sp|Q8X097|ACL1_NEUCR_Probable_ATP-citrate_synthase_subunit_1_OS=Neurospora_crassa_(strain_ATCC_24698_/_74-OR23-1A_/_CBS_708.71_/_DSM_1257_/_FGSC_987)_GN=B14D6.310_PE=3_SV=1|||0 (146202-202_3_ORF2)	146202-202_3_ORF2 [7]	66 kDa	1	0.95			notMapped		303				146202-202_3_ORF2	sp|P57742|PFD5_ARATH	P57742	PFD5_ARATH	2.559e-59
Scaffold	96338-255_4_ORF1	1047	Cluster of >sp|P31541|CLPAA_SOLLC_ATP-dependent_Clp_protease_ATP-binding_subunit_clpA_homolog_CD4A,_chloroplastic_OS=Solanum_lycopersicum_GN=CD4A_PE=3_SV=1|||0 (96338-255_4_ORF1)	96338-255_4_ORF1 [5]	104 kDa	1	0.94			mapped	D8R0V3	304	D8R0V3_SELML	0	tr|D8R0V3|D8R0V3_SELML	96338-255_4_ORF1	sp|Q9FI56|CLPC1_ARATH	Q9FI56	CLPC1_ARATH	0
Scaffold	1627-1498_1_ORF1	138	Cluster of >sp|Q85AI6|RR7_ADICA_30S_ribosomal_protein_S7,_chloroplastic_OS=Adiantum_capillus-veneris_GN=rps7-A_PE=2_SV=3|||1e-105 (1627-1498_1_ORF1)	1627-1498_1_ORF1 [2]	19 kDa	1	0.93			mapped	C7B2D9	305	C7B2D9_SELML	1.81159e-56	tr|C7B2D9|C7B2D9_SELML	1627-1498_1_ORF1	sp|P61841|RR7_ARATH	P61841	RR7_ARATH	3.23652e-77
Scaffold	74893-292_1_ORF2	866	Cluster of >sp|P28769|TCPA_ARATH_T-complex_protein_1_subunit_alpha_OS=Arabidopsis_thaliana_GN=CCT1_PE=2_SV=1|||0 (74893-292_1_ORF2)	74893-292_1_ORF2 [2]	63 kDa	1	0.92			mapped	D8R2L9	306	D8R2L9_SELML	0	tr|D8R2L9|D8R2L9_SELML	74893-292_1_ORF2	sp|P28769|TCPA_ARATH	P28769	TCPA_ARATH	0
Scaffold	53771-346_5_ORF2	952	Cluster of no_acceptable_match|||NA (53771-346_5_ORF2)	53771-346_5_ORF2 [52]	75 kDa	1	0.92			mapped	D8S4L9	307	D8S4L9_SELML	0	tr|D8S4L9|D8S4L9_SELML	53771-346_5_ORF2	sp|Q9LDZ0|HSP7J_ARATH	Q9LDZ0	HSP7J_ARATH	0
Scaffold	262435-91_2_ORF2	429	>sp|P28644|ROC1_SPIOL_28_kDa_ribonucleoprotein,_chloroplastic_OS=Spinacia_oleracea_PE=1_SV=1|||3e-32	262435-91_2_ORF2	34 kDa	1	0.92			mapped	D8QNN8	308	D8QNN8_SELML	2.7147e-28	tr|D8QNN8|D8QNN8_SELML	262435-91_2_ORF2	sp|Q04836|CP31A_ARATH	Q04836	CP31A_ARATH	4.82082e-28
Scaffold	76060-289_2_ORF2	742	Cluster of >sp|Q7X9A0|RCA1_LARTR_Ribulose_bisphosphate_carboxylase/oxygenase_activase_1,_chloroplastic_OS=Larrea_tridentata_GN=RCA1_PE=1_SV=1|||0 (76060-289_2_ORF2)	76060-289_2_ORF2 [22]	52 kDa	1	0.91			notMapped		309				76060-289_2_ORF2	tr|A0A1I9LNW6|A0A1I9LNW6_ARATH	A0A1I9LNW6	A0A1I9LNW6_ARATH	0
Scaffold	33052-440_3_ORF2	908	>sp|Q9SYP2|PFPA1_ARATH_Pyrophosphate--fructose_6-phosphate_1-phosphotransferase_subunit_alpha_1_OS=Arabidopsis_thaliana_GN=PFP-ALPHA1_PE=2_SV=1|||0	33052-440_3_ORF2	66 kDa	1	0.91			mapped	D8S5A3	310	D8S5A3_SELML	0	tr|D8S5A3|D8S5A3_SELML	33052-440_3_ORF2	sp|Q9C9K3|PFPA2_ARATH	Q9C9K3	PFPA2_ARATH	0
Scaffold	329910-53_1_ORF1	458	Cluster of >sp|Q949M3|FABG3_BRANA_3-oxoacyl-[acyl-carrier-protein]_reductase_3,_chloroplastic_OS=Brassica_napus_GN=bkr3_PE=2_SV=1|||1e-148 (329910-53_1_ORF1)	329910-53_1_ORF1 [4]	35 kDa	1	0.91			mapped	D8SMD0	311	D8SMD0_SELML	4.55777e-154	tr|D8SMD0|D8SMD0_SELML	329910-53_1_ORF1	sp|P33207|FABG_ARATH	P33207	FABG_ARATH	1.33051e-140
Scaffold	163051-176_2_ORF2	91	>sp|O49884|RL30_LUPLU_60S_ribosomal_protein_L30_OS=Lupinus_luteus_GN=RPL30_PE=3_SV=1|||2e-71	163051-176_2_ORF2	17 kDa	1	0.91			mapped	D8SRB8	312	D8SRB8_SELML	4.10423e-66	tr|D8SRB8|D8SRB8_SELML	163051-176_2_ORF2	sp|Q8VZ19|RL302_ARATH	Q8VZ19	RL302_ARATH	1.90546e-61
Scaffold	5816-941_6_ORF2	136	Cluster of >sp|P19951|RS142_MAIZE_40S_ribosomal_protein_S14_OS=Zea_mays_PE=3_SV=1|||9e-93 (5816-941_6_ORF2)	5816-941_6_ORF2 [2]	19 kDa	1	0.89			mapped	D8SVD4	313	D8SVD4_SELML	1.24981e-91	tr|D8SVD4|D8SVD4_SELML	5816-941_6_ORF2	sp|P42036|RS143_ARATH	P42036	RS143_ARATH	2.52529e-87
Scaffold	294436-71_4_ORF2	588	Cluster of >sp|P50301|METK1_ACTCH_S-adenosylmethionine_synthase_1_OS=Actinidia_chinensis_GN=SAM1_PE=2_SV=1|||0 (294436-71_4_ORF2)	294436-71_4_ORF2 [7]	43 kDa	1	0.89			mapped	D8R664	314	D8R664_SELML	0	tr|D8R664|D8R664_SELML	294436-71_4_ORF2	sp|Q9LUT2|METK4_ARATH	Q9LUT2	METK4_ARATH	0
Scaffold	177400-159_3_ORF2	1112	Cluster of >sp|Q0WNJ6|CLAH1_ARATH_Clathrin_heavy_chain_1_OS=Arabidopsis_thaliana_GN=CHC1_PE=1_SV=1|||0 (177400-159_3_ORF2)	177400-159_3_ORF2 [9]	193 kDa	1	0.89			mapped	D8SQW2	315	D8SQW2_SELML	0	tr|D8SQW2|D8SQW2_SELML	177400-159_3_ORF2	sp|Q0WLB5|CLAH2_ARATH	Q0WLB5	CLAH2_ARATH	0
Scaffold	90964-263_1_ORF2	716	Cluster of >sp|O04487|EF1G1_ARATH_Probable_elongation_factor_1-gamma_1_OS=Arabidopsis_thaliana_GN=At1g09640_PE=2_SV=1|||0 (90964-263_1_ORF2)	90964-263_1_ORF2 [4]	50 kDa	1	0.88			mapped	D8SMA1	316	D8SMA1_SELML	0	tr|D8SMA1|D8SMA1_SELML	90964-263_1_ORF2	sp|O04487|EF1G1_ARATH	O04487	EF1G1_ARATH	0
Scaffold	tr|C1EIY1|C1EIY1_MICSR	17	Ribosomal protein L37ae OS=Micromonas sp. (strain RCC299 / NOUM17) GN=RPL37AE PE=4 SV=1	tr|C1EIY1|C1EIY1_MICSR (+1)	10 kDa	1	0.87			mapped	D8QNL6	317	D8QNL6_SELML	2.6806e-50	tr|D8QNL6|D8QNL6_SELML	tr|C1EIY1|C1EIY1_MICSR	sp|Q8RXU5|R37A2_ARATH	Q8RXU5	R37A2_ARATH	7.99235e-49
Scaffold	2698-1257_3_ORF2	691	Cluster of >sp|Q8DKR7|DNAJ_THEEB_Chaperone_protein_DnaJ_OS=Thermosynechococcus_elongatus_(strain_BP-1)_GN=dnaJ_PE=3_SV=2|||7e-138 (2698-1257_3_ORF2)	2698-1257_3_ORF2 [11]	49 kDa	1	0.87			mapped	D8SYC7	318	D8SYC7_SELML	0	tr|D8SYC7|D8SYC7_SELML	2698-1257_3_ORF2	sp|Q9SJZ7|DNJA6_ARATH	Q9SJZ7	DNJA6_ARATH	0
Scaffold	74169-293_2_ORF2	850	Cluster of >sp|A5E950|ATPB1_BRASB_ATP_synthase_subunit_beta_1_OS=Bradyrhizobium_sp._(strain_BTAi1_/_ATCC_BAA-1182)_GN=atpD1_PE=3_SV=1|||0 (74169-293_2_ORF2)	74169-293_2_ORF2 [28]	61 kDa	1	0.85			mapped	D8QQX5	319	D8QQX5_SELML	0	tr|D8QQX5|D8QQX5_SELML	74169-293_2_ORF2	sp|Q9C5A9|ATPBO_ARATH	Q9C5A9	ATPBO_ARATH	0
Scaffold	57659-333_6_ORF2	422	>sp|Q9SKZ1|PUR_ARATH_Transcription_factor_Pur-alpha_1_OS=Arabidopsis_thaliana_GN=PURA1_PE=1_SV=2|||8e-94	57659-333_6_ORF2	33 kDa	1	0.85			mapped	D8TEJ1	320	D8TEJ1_SELML	1.98049e-94	tr|D8TEJ1|D8TEJ1_SELML	57659-333_6_ORF2	sp|Q9SKZ1|PUR_ARATH	Q9SKZ1	PUR_ARATH	1.36951e-90
Scaffold	3278-1178_2_ORF2	541	>sp|Q9C566|CYP40_ARATH_Peptidyl-prolyl_cis-trans_isomerase_CYP40_OS=Arabidopsis_thaliana_GN=CYP40_PE=2_SV=1|||0	3278-1178_2_ORF2	40 kDa	1	0.85			mapped	D8RG67	321	D8RG67_SELML	0	tr|D8RG67|D8RG67_SELML	3278-1178_2_ORF2	sp|Q9C566|CYP40_ARATH	Q9C566	CYP40_ARATH	0
Scaffold	399487-23_1_ORF1	664	>sp|O65396|GCST_ARATH_Aminomethyltransferase,_mitochondrial_OS=Arabidopsis_thaliana_GN=GDCST_PE=1_SV=1|||0	399487-23_1_ORF1 (+1)	47 kDa	1	0.84			mapped	D8T2P9	322	D8T2P9_SELML	0	tr|D8T2P9|D8T2P9_SELML	399487-23_1_ORF1	tr|A0A2H1ZEA9|A0A2H1ZEA9_ARATH	A0A2H1ZEA9	A0A2H1ZEA9_ARATH	0
Scaffold	sp|P35016|ENPL_CATRO	1023	Cluster of Endoplasmin homolog OS=Catharanthus roseus GN=HSP90 PE=2 SV=1 (sp|P35016|ENPL_CATRO)	sp|P35016|ENPL_CATRO [2]	93 kDa	1	0.81			mapped	D8RF85	323	D8RF85_SELML	0	tr|D8RF85|D8RF85_SELML	sp|P35016|ENPL_CATRO	sp|Q9STX5|ENPL_ARATH	Q9STX5	ENPL_ARATH	0
Scaffold	68824-304_5_ORF2	1052	>sp|Q9SE83|DRP2A_ARATH_Dynamin-2A_OS=Arabidopsis_thaliana_GN=DRP2A_PE=1_SV=2|||0	68824-304_5_ORF2	105 kDa	1	0.81			mapped	D8QSV0	324	D8QSV0_SELML	0	tr|D8QSV0|D8QSV0_SELML	68824-304_5_ORF2	sp|Q9LQ55|DRP2B_ARATH	Q9LQ55	DRP2B_ARATH	0
Scaffold	217043-123_6_ORF2	1070	Cluster of >sp|O80988|GCSP1_ARATH_Glycine_dehydrogenase_[decarboxylating]_1,_mitochondrial_OS=Arabidopsis_thaliana_GN=GDCSP_PE=1_SV=1|||0 (217043-123_6_ORF2)	217043-123_6_ORF2 [11]	114 kDa	1	0.81			notMapped		325				217043-123_6_ORF2	sp|Q93ZN2|ALKR4_ARATH	Q93ZN2	ALKR4_ARATH	2.30393e-169
Scaffold	194450-142_3_ORF1	757	Cluster of >sp|Q1XDM0|ODPA_PORYE_Pyruvate_dehydrogenase_E1_component_subunit_alpha_OS=Porphyra_yezoensis_GN=pdhA_PE=3_SV=1|||2e-166 (194450-142_3_ORF1)	194450-142_3_ORF1 [3]	53 kDa	1	0.81			mapped	D8RSD7	326	D8RSD7_SELML	0	tr|D8RSD7|D8RSD7_SELML	194450-142_3_ORF1	sp|O24457|ODPA3_ARATH	O24457	ODPA3_ARATH	0
Scaffold	192865-144_5_ORF1	186	>sp|Q9SH69|6PGD1_ARATH_6-phosphogluconate_dehydrogenase,_decarboxylating_1,_chloroplastic_OS=Arabidopsis_thaliana_GN=At1g64190_PE=2_SV=1|||2e-115	192865-144_5_ORF1 (+1)	22 kDa	1	0.81			mapped	D8RNJ9	327	D8RNJ9_SELML	5.90874e-117	tr|D8RNJ9|D8RNJ9_SELML	192865-144_5_ORF1	sp|Q9SH69|6PGD1_ARATH	Q9SH69	6PGD1_ARATH	1.3718e-112
Scaffold	145003-202_6_ORF2	836	>sp|Q10RI7|RH38_ORYSJ_DEAD-box_ATP-dependent_RNA_helicase_38_OS=Oryza_sativa_subsp._japonica_GN=Os03g0158200_PE=3_SV=1|||0	145003-202_6_ORF2 (+2)	59 kDa	1	0.81			mapped	D8T4B5	328	D8T4B5_SELML	0	tr|D8T4B5|D8T4B5_SELML	145003-202_6_ORF2	sp|Q93ZG7|RH38_ARATH	Q93ZG7	RH38_ARATH	3.51611e-177
Scaffold	14237-641_3_ORF2	913	>sp|Q38931|FKB62_ARATH_Peptidyl-prolyl_cis-trans_isomerase_FKBP62_OS=Arabidopsis_thaliana_GN=FKBP62_PE=1_SV=2|||0	14237-641_3_ORF2 (+1)	67 kDa	1	0.81			mapped	D8S1K0	329	D8S1K0_SELML	0	tr|D8S1K0|D8S1K0_SELML	14237-641_3_ORF2	sp|Q38931|FKB62_ARATH	Q38931	FKB62_ARATH	0
Scaffold	tr|E2IGZ6|E2IGZ6_PTEAA	777	Cluster of ATP synthase subunit alpha, chloroplastic OS=Pteridium aquilinum subsp. aquilinum GN=atpA PE=3 SV=1 (tr|E2IGZ6|E2IGZ6_PTEAA)	tr|E2IGZ6|E2IGZ6_PTEAA [22]	55 kDa	1	0.8			mapped	C7B2E9	330	C7B2E9_SELML	0	tr|C7B2E9|C7B2E9_SELML	tr|E2IGZ6|E2IGZ6_PTEAA	sp|P56757|ATPA_ARATH	P56757	ATPA_ARATH	0
Scaffold	72506-296_4_ORF1	816	>sp|Q94AR8|LEUC_ARATH_3-isopropylmalate_dehydratase_OS=Arabidopsis_thaliana_GN=IIL1_PE=2_SV=1|||0	72506-296_4_ORF1	58 kDa	1	0.78			mapped	D8SGC9	331	D8SGC9_SELML	0	tr|D8SGC9|D8SGC9_SELML	72506-296_4_ORF1	sp|Q94AR8|LEUC_ARATH	Q94AR8	LEUC_ARATH	0
Scaffold	24282-509_2_ORF1	142	Cluster of >sp|P50883|RL121_ARATH_60S_ribosomal_protein_L12-1_OS=Arabidopsis_thaliana_GN=RPL12A_PE=1_SV=2|||1e-108 (24282-509_2_ORF1)	24282-509_2_ORF1 [11]	19 kDa	1	0.78			mapped	D8QX04	332	D8QX04_SELML	3.1933e-101	tr|D8QX04|D8QX04_SELML	24282-509_2_ORF1	sp|P50883|RL121_ARATH	P50883	RL121_ARATH	2.54194e-105
Scaffold	126229-219_2_ORF1	226	>sp|Q9SZ54|GPX7_ARATH_Putative_glutathione_peroxidase_7,_chloroplastic_OS=Arabidopsis_thaliana_GN=GPX7_PE=2_SV=2|||8e-93	126229-219_2_ORF1	24 kDa	1	0.78			mapped	D8S7N0	333	D8S7N0_SELML	5.0752e-92	tr|D8S7N0|D8S7N0_SELML	126229-219_2_ORF1	sp|Q9SZ54|GPX7_ARATH	Q9SZ54	GPX7_ARATH	1.50663e-89
Scaffold	260531-93_3_ORF2	865	>sp|Q9Y2X3|NOP58_HUMAN_Nucleolar_protein_58_OS=Homo_sapiens_GN=NOP58_PE=1_SV=1|||0	260531-93_3_ORF2	63 kDa	1	0.77			mapped	D8RG17	334	D8RG17_SELML	0	tr|D8RG17|D8RG17_SELML	260531-93_3_ORF2	sp|O04658|NOP5A_ARATH	O04658	NOP5A_ARATH	0
Scaffold	tr|Q2HXL1|Q2HXL1_CONCI	40	Cluster of Histone 3 OS=Conocephalum conicum PE=4 SV=1 (tr|Q2HXL1|Q2HXL1_CONCI)	tr|Q2HXL1|Q2HXL1_CONCI [10]	13 kDa	1	0.75			mapped	D8QUA3	335	D8QUA3_SELML	1.23151e-66	tr|D8QUA3|D8QUA3_SELML	tr|Q2HXL1|Q2HXL1_CONCI	sp|P59226|H32_ARATH	P59226	H32_ARATH	3.28108e-66
Scaffold	83370-275_6_ORF2	475	Cluster of >sp|Q8DJB3|GRPE_THEEB_Protein_GrpE_OS=Thermosynechococcus_elongatus_(strain_BP-1)_GN=grpE_PE=3_SV=1|||5e-53 (83370-275_6_ORF2)	83370-275_6_ORF2 [3]	36 kDa	1	0.75			mapped	D8R3J7	336	D8R3J7_SELML	6.75686e-83	tr|D8R3J7|D8R3J7_SELML	83370-275_6_ORF2	tr|Q94K56|Q94K56_ARATH	Q94K56	Q94K56_ARATH	9.7573e-79
Scaffold	tr|C5YKV0|C5YKV0_SORBI	999	Putative uncharacterized protein Sb07g020190 OS=Sorghum bicolor GN=Sb07g020190 PE=3 SV=1	tr|C5YKV0|C5YKV0_SORBI	87 kDa	1	0.74			mapped	D8RDJ0	337	D8RDJ0_SELML	0	tr|D8RDJ0|D8RDJ0_SELML	tr|C5YKV0|C5YKV0_SORBI	sp|Q9LZF6|CD48E_ARATH	Q9LZF6	CD48E_ARATH	0
Scaffold	tr|B9SHG6|B9SHG6_RICCO	798	Cluster of Chaperonin containing t-complex protein 1, theta subunit, tcpq, putative OS=Ricinus communis GN=RCOM_1121730 PE=3 SV=1 (tr|B9SHG6|B9SHG6_RICCO)	tr|B9SHG6|B9SHG6_RICCO [4]	56 kDa	1	0.74			mapped	D8R0W3	338	D8R0W3_SELML	0	tr|D8R0W3|D8R0W3_SELML	tr|B9SHG6|B9SHG6_RICCO	sp|Q94K05|TCPQ_ARATH	Q94K05	TCPQ_ARATH	0
Scaffold	tr|A9U0A5|A9U0A5_PHYPA	992	Predicted protein OS=Physcomitrella patens subsp. patens GN=PHYPADRAFT_227136 PE=3 SV=1	tr|A9U0A5|A9U0A5_PHYPA	85 kDa	1	0.74			mapped	D8TCH7	339	D8TCH7_SELML	0	tr|D8TCH7|D8TCH7_SELML	tr|A9U0A5|A9U0A5_PHYPA	sp|O50008|METE1_ARATH	O50008	METE1_ARATH	0
Scaffold	tr|A9S8Q9|A9S8Q9_PHYPA	847	Cluster of Predicted protein OS=Physcomitrella patens subsp. patens GN=PHYPADRAFT_76060 PE=3 SV=1 (tr|A9S8Q9|A9S8Q9_PHYPA)	tr|A9S8Q9|A9S8Q9_PHYPA [3]	60 kDa	1	0.74			mapped	D8SQL1	340	D8SQL1_SELML	0	tr|D8SQL1|D8SQL1_SELML	tr|A9S8Q9|A9S8Q9_PHYPA	sp|Q84WV1|TCPG_ARATH	Q84WV1	TCPG_ARATH	0
Scaffold	91839-262_2_ORF2	380	>sp|O49292|PPD4_ARATH_PsbP_domain-containing_protein_4,_chloroplastic_OS=Arabidopsis_thaliana_GN=PPD4_PE=1_SV=2|||2e-100	91839-262_2_ORF2	32 kDa	1	0.74			mapped	D8SNQ2	341	D8SNQ2_SELML	9.60274e-89	tr|D8SNQ2|D8SNQ2_SELML	91839-262_2_ORF2	sp|O49292|PPD4_ARATH	O49292	PPD4_ARATH	3.0082e-97
Scaffold	8788-797_5_ORF2	51	Cluster of >sp|Q9FZH0|R35A2_ARATH_60S_ribosomal_protein_L35a-2_OS=Arabidopsis_thaliana_GN=RPL35AB_PE=3_SV=1|||1e-63 (8788-797_5_ORF2)	8788-797_5_ORF2 [2]	14 kDa	1	0.74			mapped	D8T294	342	D8T294_SELML	3.34976e-59	tr|D8T294|D8T294_SELML	8788-797_5_ORF2	sp|Q9FZH0|R35A2_ARATH	Q9FZH0	R35A2_ARATH	6.54322e-60
Scaffold	87113-269_4_ORF1	79	>sp|Q9M9W1|RL222_ARATH_60S_ribosomal_protein_L22-2_OS=Arabidopsis_thaliana_GN=RPL22B_PE=2_SV=1|||2e-57	87113-269_4_ORF1 (+1)	16 kDa	1	0.74			mapped	D8RB37	343	D8RB37_SELML	3.02881e-62	tr|D8RB37|D8RB37_SELML	87113-269_4_ORF1	sp|Q9M9W1|RL222_ARATH	Q9M9W1	RL222_ARATH	1.08964e-53
Scaffold	320704-57_4_ORF1	530	>sp|Q9THX6|TL29_SOLLC_Thylakoid_lumenal_29_kDa_protein,_chloroplastic_OS=Solanum_lycopersicum_GN=CLEB3J9_PE=3_SV=1|||3e-118	320704-57_4_ORF1 (+3)	39 kDa	1	0.74			mapped	D8SX61	344	D8SX61_SELML	3.16807e-121	tr|D8SX61|D8SX61_SELML	320704-57_4_ORF1	sp|P82281|TL29_ARATH	P82281	TL29_ARATH	2.02811e-114
Scaffold	272341-85_2_ORF2	1091	Cluster of >sp|Q94A40|COPA1_ARATH_Coatomer_subunit_alpha-1_OS=Arabidopsis_thaliana_GN=At1g62020_PE=1_SV=2|||0 (272341-85_2_ORF2)	272341-85_2_ORF2 [6]	137 kDa	1	0.74			mapped	D8SFK2	345	D8SFK2_SELML	0	tr|D8SFK2|D8SFK2_SELML	272341-85_2_ORF2	sp|Q94A40|COPA1_ARATH	Q94A40	COPA1_ARATH	0
Scaffold	256174-95_1_ORF1	169	>sp|Q8LBS4|GRS12_ARATH_Monothiol_glutaredoxin-S12,_chloroplastic_OS=Arabidopsis_thaliana_GN=GRXS12_PE=1_SV=2|||9e-44	256174-95_1_ORF1 (+1)	21 kDa	1	0.74			mapped	D8RBN6	346	D8RBN6_SELML	6.11454e-36	tr|D8RBN6|D8RBN6_SELML	256174-95_1_ORF1	sp|Q8LBS4|GRS12_ARATH	Q8LBS4	GRS12_ARATH	5.95372e-40
Scaffold	238348-108_2_ORF2	442	>sp|O49818|LGUL_CICAR_Lactoylglutathione_lyase_OS=Cicer_arietinum_PE=2_SV=1|||3e-113	238348-108_2_ORF2	34 kDa	1	0.74			mapped	D8STA0	347	D8STA0_SELML	5.58467e-104	tr|D8STA0|D8STA0_SELML	238348-108_2_ORF2	sp|Q8H0V3|LGUL_ARATH	Q8H0V3	LGUL_ARATH	1.16957e-102
Scaffold	21899-533_1_ORF2	122	>sp|P51419|RL273_ARATH_60S_ribosomal_protein_L27-3_OS=Arabidopsis_thaliana_GN=RPL27C_PE=2_SV=2|||2e-68	21899-533_1_ORF2 (+1)	18 kDa	1	0.74			mapped	D8QZM0	348	D8QZM0_SELML	9.75323e-80	tr|D8QZM0|D8QZM0_SELML	21899-533_1_ORF2	sp|P51419|RL273_ARATH	P51419	RL273_ARATH	7.19374e-65
Scaffold	195271-142_1_ORF2	341	>sp|Q8W487|YB95_ARATH_Uncharacterized_protein_At2g39795,_mitochondrial_OS=Arabidopsis_thaliana_GN=At2g39795_PE=1_SV=1|||3e-28	195271-142_1_ORF2 (+1)	30 kDa	1	0.74			mapped	D8SC56	349	D8SC56_SELML	1.09706e-30	tr|D8SC56|D8SC56_SELML	195271-142_1_ORF2	sp|Q8W487|YB95_ARATH	Q8W487	YB95_ARATH	7.09387e-24
Scaffold	172993-163_5_ORF1	406	>sp|Q9XJ36|CLPR2_ARATH_ATP-dependent_Clp_protease_proteolytic_subunit-related_protein_2,_chloroplastic_OS=Arabidopsis_thaliana_GN=CLPR2_PE=1_SV=1|||4e-129	172993-163_5_ORF1 (+1)	33 kDa	1	0.74			mapped	D8RMC3	350	D8RMC3_SELML	1.24258e-125	tr|D8RMC3|D8RMC3_SELML	172993-163_5_ORF1	sp|Q9XJ36|CLPR2_ARATH	Q9XJ36	CLPR2_ARATH	4.48836e-126
Scaffold	156554-185_2_ORF1	747	>sp|Q42524|4CL1_ARATH_4-coumarate--CoA_ligase_1_OS=Arabidopsis_thaliana_GN=4CL1_PE=1_SV=1|||0	156554-185_2_ORF1	52 kDa	1	0.74			mapped	D8SPQ0	351	D8SPQ0_SELML	0	tr|D8SPQ0|D8SPQ0_SELML	156554-185_2_ORF1	sp|Q9S777|4CL3_ARATH	Q9S777	4CL3_ARATH	0
Scaffold	102497-246_4_ORF2	274	Cluster of >sp|Q9HB71|CYBP_HUMAN_Calcyclin-binding_protein_OS=Homo_sapiens_GN=CACYBP_PE=1_SV=2|||2e-35 (102497-246_4_ORF2)	102497-246_4_ORF2 [2]	27 kDa	1	0.74			mapped	D8QSV8	352	D8QSV8_SELML	1.99049e-67	tr|D8QSV8|D8QSV8_SELML	102497-246_4_ORF2	tr|Q9C8R4|Q9C8R4_ARATH	Q9C8R4	Q9C8R4_ARATH	1.56197e-66
Scaffold	75664-290_4_ORF2	648	>sp|Q9SF40|RL4A_ARATH_60S_ribosomal_protein_L4-1_OS=Arabidopsis_thaliana_GN=RPL4A_PE=2_SV=1|||0	75664-290_4_ORF2 (+1)	46 kDa	1	0.72			mapped	D8R5D6	353	D8R5D6_SELML	0	tr|D8R5D6|D8R5D6_SELML	75664-290_4_ORF2	sp|Q9SF40|RL4A_ARATH	Q9SF40	RL4A_ARATH	0
Scaffold	279107-80_6_ORF4	282	>sp|O65282|CH10C_ARATH_20_kDa_chaperonin,_chloroplastic_OS=Arabidopsis_thaliana_GN=CPN21_PE=1_SV=2|||4e-101	279107-80_6_ORF4 (+1)	27 kDa	1	0.72			mapped	D8RH41	354	D8RH41_SELML	7.81468e-99	tr|D8RH41|D8RH41_SELML	279107-80_6_ORF4	sp|O65282|CH20_ARATH	O65282	CH20_ARATH	5.91355e-98
Scaffold	212164-127_1_ORF2	479	Cluster of >sp|O80448|PDX11_ARATH_Pyridoxal_biosynthesis_protein_PDX1.1_OS=Arabidopsis_thaliana_GN=PDX11_PE=1_SV=1|||0 (212164-127_1_ORF2)	212164-127_1_ORF2 [3]	36 kDa	1	0.72			mapped	D8RE11	355	D8RE11_SELML	0	tr|D8RE11|D8RE11_SELML	212164-127_1_ORF2	sp|Q8L940|PDX13_ARATH	Q8L940	PDX13_ARATH	0
Scaffold	224049-118_1_ORF2	990	Cluster of >sp|O94039|TKT1_CANAX_Transketolase_1_OS=Candida_albicans_GN=TKT1_PE=3_SV=1|||0 (224049-118_1_ORF2)	224049-118_1_ORF2 [9]	85 kDa	1	0.71			mapped	D8T6I4	356	D8T6I4_SELML	0	tr|D8T6I4|D8T6I4_SELML	224049-118_1_ORF2	sp|Q8RWV0|TKTC1_ARATH	Q8RWV0	TKTC1_ARATH	0
Scaffold	73912-293_6_ORF2	316	Cluster of >sp|P29766|RL8_SOLLC_60S_ribosomal_protein_L8_OS=Solanum_lycopersicum_GN=RPL8_PE=2_SV=1|||6e-173 (73912-293_6_ORF2)	73912-293_6_ORF2 [8]	29 kDa	1	0.7			mapped	D8RF89	357	D8RF89_SELML	2.56282e-173	tr|D8RF89|D8RF89_SELML	73912-293_6_ORF2	sp|Q42064|RL83_ARATH	Q42064	RL83_ARATH	2.24255e-167
Scaffold	186339-150_1_ORF2	600	Cluster of >sp|P46283|S17P_ARATH_Sedoheptulose-1,7-bisphosphatase,_chloroplastic_OS=Arabidopsis_thaliana_GN=At3g55800_PE=1_SV=1|||0 (186339-150_1_ORF2)	186339-150_1_ORF2 [7]	43 kDa	1	0.7			mapped	D8RQS9	358	D8RQS9_SELML	0	tr|D8RQS9|D8RQS9_SELML	186339-150_1_ORF2	sp|P46283|S17P_ARATH	P46283	S17P_ARATH	0
Scaffold	38153-411_5_ORF2	545	Cluster of no_acceptable_match|||NA (38153-411_5_ORF2)	38153-411_5_ORF2 [4]	40 kDa	1	0.69			mapped	D8S8H8	359	D8S8H8_SELML	0	tr|D8S8H8|D8S8H8_SELML	38153-411_5_ORF2	sp|Q38799|ODPB1_ARATH	Q38799	ODPB1_ARATH	0
Scaffold	350882-43_3_ORF2	240	Cluster of >sp|Q54Z26|GLYC1_DICDI_Serine_hydroxymethyltransferase_1_OS=Dictyostelium_discoideum_GN=shmt1_PE=1_SV=1|||1e-89 (350882-43_3_ORF2)	350882-43_3_ORF2 [9]	25 kDa	1	0.69			mapped	D8QYX4	360	D8QYX4_SELML	4.68721e-124	tr|D8QYX4|D8QYX4_SELML	350882-43_3_ORF2	sp|O23254|GLYC4_ARATH	O23254	GLYC4_ARATH	7.88448e-125
Scaffold	26987-486_4_ORF2	150	Cluster of >sp|O22644|RL23A_FRIAG_60S_ribosomal_protein_L23A_OS=Fritillaria_agrestis_GN=RPL23A_PE=2_SV=1|||7e-73 (26987-486_4_ORF2)	26987-486_4_ORF2 [8]	20 kDa	1	0.69			mapped	D8SKB2	361	D8SKB2_SELML	1.0967e-69	tr|D8SKB2|D8SKB2_SELML	26987-486_4_ORF2	sp|Q9M3C3|R23A2_ARATH	Q9M3C3	R23A2_ARATH	3.9823e-60
Scaffold	160540-179_4_ORF1	821	Cluster of >sp|Q9SNX8|GAPN_APIGR_NADP-dependent_glyceraldehyde-3-phosphate_dehydrogenase_OS=Apium_graveolens_PE=1_SV=1|||0 (160540-179_4_ORF1)	160540-179_4_ORF1 [12]	58 kDa	1	0.69			mapped	D8QWI7	362	D8QWI7_SELML	0	tr|D8QWI7|D8QWI7_SELML	160540-179_4_ORF1	tr|A0A2H1ZE23|A0A2H1ZE23_ARATH	A0A2H1ZE23	A0A2H1ZE23_ARATH	0
Scaffold	336768-49_5_ORF1	703	>sp|P37707|B2_DAUCA_B2_protein_OS=Daucus_carota_PE=2_SV=1|||3e-27	336768-49_5_ORF1	50 kDa	1	0.68			mapped	D8QXX9	363	D8QXX9_SELML	1.43596e-25	tr|D8QXX9|D8QXX9_SELML	336768-49_5_ORF1	tr|F4IUS3|F4IUS3_ARATH	F4IUS3	F4IUS3_ARATH	7.28757e-38
Scaffold	180659-155_3_ORF2	813	>sp|Q3MBJ4|GLGC_ANAVT_Glucose-1-phosphate_adenylyltransferase_OS=Anabaena_variabilis_(strain_ATCC_29413_/_PCC_7937)_GN=glgC_PE=3_SV=1|||0	180659-155_3_ORF2 (+3)	58 kDa	1	0.68			notMapped		364				180659-155_3_ORF2	sp|Q8H124|Y2446_ARATH	Q8H124	Y2446_ARATH	3.7611e-40
Scaffold	171647-165_1_ORF1	957	>sp|Q9LD90|CBF5_ARATH_H/ACA_ribonucleoprotein_complex_subunit_4_OS=Arabidopsis_thaliana_GN=CBF5_PE=1_SV=1|||0	171647-165_1_ORF1	75 kDa	1	0.68			mapped	D8RW99	365	D8RW99_SELML	0	tr|D8RW99|D8RW99_SELML	171647-165_1_ORF1	tr|Q0WVR7|Q0WVR7_ARATH	Q0WVR7	Q0WVR7_ARATH	1.21293e-23
Scaffold	135393-211_5_ORF1	187	Cluster of >sp|Q94A97|UBC35_ARATH_Ubiquitin-conjugating_enzyme_E2_35_OS=Arabidopsis_thaliana_GN=UBC35_PE=1_SV=1|||1e-110 (135393-211_5_ORF1)	135393-211_5_ORF1 [2]	22 kDa	1	0.68			mapped	D8SFR9	366	D8SFR9_SELML	2.21153e-95	tr|D8SFR9|D8SFR9_SELML	135393-211_5_ORF1	sp|Q94A97|UBC35_ARATH	Q94A97	UBC35_ARATH	2.33379e-107
Scaffold	211892-127_2_ORF2	1012	Cluster of >sp|P54609|CD48A_ARATH_Cell_division_control_protein_48_homolog_A_OS=Arabidopsis_thaliana_GN=CDC48A_PE=1_SV=1|||0 (211892-127_2_ORF2)	211892-127_2_ORF2 [7]	91 kDa	1	0.67			mapped	D8RDJ0	367	D8RDJ0_SELML	0	tr|D8RDJ0|D8RDJ0_SELML	211892-127_2_ORF2	sp|Q9LZF6|CD48E_ARATH	Q9LZF6	CD48E_ARATH	0
Scaffold	1610-1504_2_ORF1	924	Cluster of >sp|Q95M18|ENPL_BOVIN_Endoplasmin_OS=Bos_taurus_GN=HSP90B1_PE=2_SV=1|||0 (1610-1504_2_ORF1)	1610-1504_2_ORF1 [14]	69 kDa	1	0.66			mapped	D8SDB6	368	D8SDB6_SELML	0	tr|D8SDB6|D8SDB6_SELML	1610-1504_2_ORF1	sp|O03986|HS904_ARATH	O03986	HS904_ARATH	0
Scaffold	82340-277_1_ORF2	417	>sp|Q9AR14|PIP15_MAIZE_Aquaporin_PIP1-5_OS=Zea_mays_GN=PIP1-5_PE=2_SV=1|||1e-173	82340-277_1_ORF2 (+1)	33 kDa	1	0.65			mapped	D8S9G4	369	D8S9G4_SELML	5.88983e-159	tr|D8S9G4|D8S9G4_SELML	82340-277_1_ORF2	sp|Q39196|PIP14_ARATH	Q39196	PIP14_ARATH	3.75438e-170
Scaffold	151836-193_1_ORF2	580	Cluster of >sp|P31167|ADT1_ARATH_ADP,ATP_carrier_protein_1,_mitochondrial_OS=Arabidopsis_thaliana_GN=AAC1_PE=1_SV=2|||0 (151836-193_1_ORF2)	151836-193_1_ORF2 [6]	42 kDa	1	0.63			mapped	D8R367	370	D8R367_SELML	2.26976e-180	tr|D8R367|D8R367_SELML	151836-193_1_ORF2	sp|P40941|ADT2_ARATH	P40941	ADT2_ARATH	0
Scaffold	297118-70_2_ORF2	673	Cluster of >sp|Q56YA5|SGAT_ARATH_Serine--glyoxylate_aminotransferase_OS=Arabidopsis_thaliana_GN=AGT1_PE=1_SV=2|||0 (297118-70_2_ORF2)	297118-70_2_ORF2 [7]	48 kDa	1	0.62			mapped	D8T4K3	371	D8T4K3_SELML	0	tr|D8T4K3|D8T4K3_SELML	297118-70_2_ORF2	sp|Q56YA5|SGAT_ARATH	Q56YA5	SGAT_ARATH	0
Scaffold	27503-481_2_ORF2	42	Cluster of >sp|O80929|RL361_ARATH_60S_ribosomal_protein_L36-1_OS=Arabidopsis_thaliana_GN=RPL36A_PE=2_SV=1|||1e-55 (27503-481_2_ORF2)	27503-481_2_ORF2 [3]	13 kDa	1	0.61			mapped	D8R598	372	D8R598_SELML	7.48341e-51	tr|D8R598|D8R598_SELML	27503-481_2_ORF2	sp|O80929|RL361_ARATH	O80929	RL361_ARATH	8.82356e-52
Scaffold	tr|Q6L3T9|Q6L3T9_SOLDE	559	No apical meristem, identical OS=Solanum demissum GN=SDM1_34t00003 PE=4 SV=2	tr|Q6L3T9|Q6L3T9_SOLDE (+1)	41 kDa	1	0.58			notMapped		373				tr|Q6L3T9|Q6L3T9_SOLDE	tr|A0A1P8BGQ7|A0A1P8BGQ7_ARATH	A0A1P8BGQ7	A0A1P8BGQ7_ARATH	2.57086e-176
Scaffold	tr|Q538Q7|Q538Q7_ANEME	172	Cluster of Ribosomal protein small subunit 4 (Fragment) OS=Anemia mexicana GN=rps4 PE=4 SV=1 (tr|Q538Q7|Q538Q7_ANEME)	tr|Q538Q7|Q538Q7_ANEME [10]	21 kDa	1	0.58			mapped	C7B2I9	374	C7B2I9_SELML	6.06817e-43	tr|C7B2I9|C7B2I9_SELML	tr|Q538Q7|Q538Q7_ANEME	sp|P56799|RR4_ARATH	P56799	RR4_ARATH	7.62806e-70
Scaffold	tr|D7MQA6|D7MQA6_ARALL	557	Cluster of Putative uncharacterized protein OS=Arabidopsis lyrata subsp. lyrata GN=ARALYDRAFT_918103 PE=4 SV=1 (tr|D7MQA6|D7MQA6_ARALL)	tr|D7MQA6|D7MQA6_ARALL [2]	41 kDa		0.58			mapped	D8R1R9	375	D8R1R9_SELML	0	tr|D8R1R9|D8R1R9_SELML	tr|D7MQA6|D7MQA6_ARALL	sp|Q9LUE6|RGP4_ARATH	Q9LUE6	RGP4_ARATH	0
Scaffold	tr|C6SZ18|C6SZ18_SOYBN	4	Cluster of Putative uncharacterized protein OS=Glycine max PE=4 SV=1 (tr|C6SZ18|C6SZ18_SOYBN)	tr|C6SZ18|C6SZ18_SOYBN [4]	8 kDa		0.58			mapped	D8RCD2	376	D8RCD2_SELML	5.20157e-35	tr|D8RCD2|D8RCD2_SELML	tr|C6SZ18|C6SZ18_SOYBN	sp|Q9SR73|RS281_ARATH	Q9SR73	RS281_ARATH	5.02737e-35
Scaffold	tr|C1E6C0|C1E6C0_MICSR	1119	Predicted protein OS=Micromonas sp. (strain RCC299 / NOUM17) GN=MICPUN_58612 PE=4 SV=1	tr|C1E6C0|C1E6C0_MICSR	251 kDa		0.58			notMapped		377				tr|C1E6C0|C1E6C0_MICSR	sp|Q944P7|AMPL2_ARATH	Q944P7	AMPL2_ARATH	7.51998e-148
Scaffold	tr|A9RDI1|A9RDI1_PHYPA	492	Cluster of Predicted protein (Fragment) OS=Physcomitrella patens subsp. patens GN=PHYPADRAFT_111900 PE=4 SV=1 (tr|A9RDI1|A9RDI1_PHYPA)	tr|A9RDI1|A9RDI1_PHYPA [4]	37 kDa	1	0.58			mapped	D8RPL1	378	D8RPL1_SELML	9.99806e-147	tr|D8RPL1|D8RPL1_SELML	tr|A9RDI1|A9RDI1_PHYPA	sp|Q944I4|GLYK_ARATH	Q944I4	GLYK_ARATH	2.82412e-153
Scaffold	tr|A5C709|A5C709_VITVI	1096	Putative uncharacterized protein OS=Vitis vinifera GN=VITISV_002864 PE=4 SV=1	tr|A5C709|A5C709_VITVI	146 kDa		0.58			notMapped		379				tr|A5C709|A5C709_VITVI	sp|P0C2F6|RNHX1_ARATH	P0C2F6	RNHX1_ARATH	1.16521e-24
Scaffold	sp|Q0DJA3|DRB3_ORYSJ	671	Double-stranded RNA-binding protein 3 OS=Oryza sativa subsp. japonica GN=DRB3 PE=2 SV=1	sp|Q0DJA3|DRB3_ORYSJ (+6)	48 kDa		0.58			notMapped		380				sp|Q0DJA3|DRB3_ORYSJ	sp|Q8VZI8|FTSHA_ARATH	Q8VZI8	FTSHA_ARATH	0
Scaffold	rr|REV_A4QJZ0|REV_YCF1_OLIPU	1115	Putative membrane protein ycf1 OS=Olimarabidopsis pumila GN=ycf1-A PE=3 SV=1	rr|REV_A4QJZ0|REV_YCF1_OLIPU (+3)	215 kDa		0.58			notMapped		381				rr|REV_A4QJZ0|REV_YCF1_OLIPU	tr|Q9SKZ0|Q9SKZ0_ARATH	Q9SKZ0	Q9SKZ0_ARATH	4.18317e-48
Scaffold	88715-266_1_ORF2	975	>sp|O82802|SIR1_TOBAC_Sulfite_reductase_1_[ferredoxin],_chloroplastic_OS=Nicotiana_tabacum_GN=SIR1_PE=1_SV=1|||0	88715-266_1_ORF2	80 kDa		0.58			notMapped		382				88715-266_1_ORF2	tr|F4ISP4|F4ISP4_ARATH	F4ISP4	F4ISP4_ARATH	1.00351e-175
Scaffold	84136-274_5_ORF2	592	>sp|Q67W29|DAPB1_ORYSJ_Probable_4-hydroxy-tetrahydrodipicolinate_reductase_1,_chloroplastic_OS=Oryza_sativa_subsp._japonica_GN=DAPB1_PE=2_SV=1|||1e-132	84136-274_5_ORF2 (+1)	43 kDa		0.58			mapped	D8R6G2	383	D8R6G2_SELML	1.46138e-140	tr|D8R6G2|D8R6G2_SELML	84136-274_5_ORF2	sp|Q8LB01|DAPB2_ARATH	Q8LB01	DAPB2_ARATH	2.96445e-128
Scaffold	78986-284_3_ORF2	247	>sp|P13240|DR206_PEA_Disease_resistance_response_protein_206_OS=Pisum_sativum_GN=PI206_PE=2_SV=2|||3e-13	78986-284_3_ORF2	25 kDa		0.58			mapped	D8RKP6	384	D8RKP6_SELML	1.56826e-12	tr|D8RKP6|D8RKP6_SELML	78986-284_3_ORF2	sp|Q9C523|DIR19_ARATH	Q9C523	DIR19_ARATH	1.5358e-12
Scaffold	7220-857_1_ORF1	436	>sp|Q92BZ4|FOLD_LISIN_Bifunctional_protein_FolD_OS=Listeria_innocua_serovar_6a_(strain_CLIP_11262)_GN=folD_PE=3_SV=1|||1e-107	7220-857_1_ORF1 (+1)	34 kDa		0.58			mapped	D8RXF8	385	D8RXF8_SELML	4.09729e-155	tr|D8RXF8|D8RXF8_SELML	7220-857_1_ORF1	sp|Q9LHH7|FOLD2_ARATH	Q9LHH7	FOLD2_ARATH	2.45266e-155
Scaffold	42648-390_5_ORF1	608	>sp|Q43472|GRP_HORVU_Glycine-rich_RNA-binding_protein_blt801_OS=Hordeum_vulgare_GN=blt801_PE=1_SV=1|||6e-31	42648-390_5_ORF1 (+1)	44 kDa	1	0.58			mapped	D8TAY9	386	D8TAY9_SELML	1.72004e-23	tr|D8TAY9|D8TAY9_SELML	42648-390_5_ORF1	sp|Q04836|CP31A_ARATH	Q04836	CP31A_ARATH	3.36668e-25
Scaffold	420870-13_3_ORF1	287	>sp|Q5VT25|MRCKA_HUMAN_Serine/threonine-protein_kinase_MRCK_alpha_OS=Homo_sapiens_GN=CDC42BPA_PE=1_SV=1|||2e-09	420870-13_3_ORF1	27 kDa	1	0.58			mapped	D8RTF3	387	D8RTF3_SELML	8.23471e-26	tr|D8RTF3|D8RTF3_SELML	420870-13_3_ORF1	sp|Q84TD8|FLXL2_ARATH	Q84TD8	FLXL2_ARATH	8.48634e-58
Scaffold	402768-23_4_ORF2	897	>sp|P36444|MAOC_FLAPR_NADP-dependent_malic_enzyme,_chloroplastic_OS=Flaveria_pringlei_GN=MODA_PE=2_SV=1|||0	402768-23_4_ORF2	66 kDa	1	0.58			mapped	D8QX72	388	D8QX72_SELML	0	tr|D8QX72|D8QX72_SELML	402768-23_4_ORF2	sp|Q9XGZ0|MAOP3_ARATH	Q9XGZ0	MAOP3_ARATH	0
Scaffold	39064-407_4_ORF2	1024	Cluster of >sp|Q0IIM3|HS105_BOVIN_Heat_shock_protein_105_kDa_OS=Bos_taurus_GN=HSPH1_PE=2_SV=1|||0 (39064-407_4_ORF2)	39064-407_4_ORF2 [3]	94 kDa	1	0.58			mapped	D8ST01	389	D8ST01_SELML	0	tr|D8ST01|D8ST01_SELML	39064-407_4_ORF2	sp|Q9S7C0|HSP7O_ARATH	Q9S7C0	HSP7O_ARATH	0
Scaffold	383781-29_2_ORF1	1013	>sp|P48369|GYRA_AERSA_DNA_gyrase_subunit_A_OS=Aeromonas_salmonicida_GN=gyrA_PE=3_SV=1|||0	383781-29_2_ORF1 (+1)	92 kDa		0.58			notMapped		390				383781-29_2_ORF1	sp|Q84W89|RH37_ARATH	Q84W89	RH37_ARATH	0
Scaffold	342970-47_2_ORF1	220	Cluster of >sp|C4XGC2|WRBA_DESMR_Flavoprotein_WrbA_OS=Desulfovibrio_magneticus_(strain_ATCC_700980_/_DSM_13731_/_RS-1)_GN=wrbA_PE=3_SV=1|||6e-66 (342970-47_2_ORF1)	342970-47_2_ORF1 [2]	24 kDa	1	0.58			mapped	D8RPY6	391	D8RPY6_SELML	8.7525e-124	tr|D8RPY6|D8RPY6_SELML	342970-47_2_ORF1	sp|Q6NQE2|FQRL1_ARATH	Q6NQE2	FQRL1_ARATH	8.3446e-126
Scaffold	316470-59_3_ORF1	217	>sp|Q9LK61|RR10_ARATH_30S_ribosomal_protein_S10,_chloroplastic_OS=Arabidopsis_thaliana_GN=RPS10_PE=1_SV=1|||5e-58	316470-59_3_ORF1	24 kDa	1	0.58			mapped	D8SJW8	392	D8SJW8_SELML	1.51693e-51	tr|D8SJW8|D8SJW8_SELML	316470-59_3_ORF1	sp|Q9LK61|RR10_ARATH	Q9LK61	RR10_ARATH	1.93382e-54
Scaffold	306493-65_5_ORF1	920	Cluster of >sp|Q9LPR4|LEU11_ARATH_2-isopropylmalate_synthase_1,_chloroplastic_OS=Arabidopsis_thaliana_GN=IPMS1_PE=1_SV=2|||0 (306493-65_5_ORF1)	306493-65_5_ORF1 [2]	68 kDa		0.58			mapped	D8S9Y1	393	D8S9Y1_SELML	0	tr|D8S9Y1|D8S9Y1_SELML	306493-65_5_ORF1	sp|Q9C550|LEU12_ARATH	Q9C550	LEU12_ARATH	0
Scaffold	293356-72_1_ORF1	264	no_acceptable_match|||NA	293356-72_1_ORF1 (+1)	26 kDa		0.58			mapped	D8RKA5	394	D8RKA5_SELML	2.86298e-26	tr|D8RKA5|D8RKA5_SELML	293356-72_1_ORF1	sp|Q9LR72|PPR7_ARATH	Q9LR72	PPR7_ARATH	0.397051
Scaffold	245708-102_5_ORF2	1117	Cluster of >sp|Q03460|GLSN_MEDSA_Glutamate_synthase_[NADH],_amyloplastic_OS=Medicago_sativa_PE=1_SV=1|||0 (245708-102_5_ORF2)	245708-102_5_ORF2 [7]	242 kDa	1	0.58			mapped	D8STB8	395	D8STB8_SELML	0	tr|D8STB8|D8STB8_SELML	245708-102_5_ORF2	sp|Q9LV03|GLUT1_ARATH	Q9LV03	GLUT1_ARATH	0
Scaffold	231314-112_2_ORF2	643	Cluster of >sp|Q93Z70|ARGC_ARATH_Probable_N-acetyl-gamma-glutamyl-phosphate_reductase,_chloroplastic_OS=Arabidopsis_thaliana_GN=At2g19940_PE=1_SV=2|||0 (231314-112_2_ORF2)	231314-112_2_ORF2 [3]	46 kDa		0.58			mapped	D8SDJ9	396	D8SDJ9_SELML	0	tr|D8SDJ9|D8SDJ9_SELML	231314-112_2_ORF2	sp|Q93Z70|ARGC_ARATH	Q93Z70	ARGC_ARATH	0
Scaffold	2311-1327_2_ORF5	835	Cluster of >sp|B0BZL2|ATPA1_ACAM1_ATP_synthase_subunit_alpha_1_OS=Acaryochloris_marina_(strain_MBIC_11017)_GN=atpA1_PE=3_SV=1|||0 (2311-1327_2_ORF5)	2311-1327_2_ORF5 [23]	59 kDa	1	0.58			mapped	C7B2E9	397	C7B2E9_SELML	0	tr|C7B2E9|C7B2E9_SELML	2311-1327_2_ORF5	tr|A0A2P2CLF9|A0A2P2CLF9_ARATH	A0A2P2CLF9	A0A2P2CLF9_ARATH	0
Scaffold	21749-535_6_ORF2	135	>sp|P20143|PSAH_HORVU_Photosystem_I_reaction_center_subunit_VI,_chloroplastic_OS=Hordeum_vulgare_GN=PSAH_PE=1_SV=1|||8e-59	21749-535_6_ORF2	19 kDa		0.58			mapped	D8QU91	398	D8QU91_SELML	6.00071e-41	tr|D8QU91|D8QU91_SELML	21749-535_6_ORF2	sp|Q9SUI6|PSAH2_ARATH	Q9SUI6	PSAH2_ARATH	3.69603e-52
Scaffold	186732-150_2_ORF2	984	>sp|O82261|DEGP2_ARATH_Protease_Do-like_2,_chloroplastic_OS=Arabidopsis_thaliana_GN=DEGP2_PE=1_SV=2|||0	186732-150_2_ORF2 (+1)	83 kDa		0.58			mapped	D8RDJ7	399	D8RDJ7_SELML	0	tr|D8RDJ7|D8RDJ7_SELML	186732-150_2_ORF2	sp|Q9FL12|DEGP9_ARATH	Q9FL12	DEGP9_ARATH	0
Scaffold	17524-591_2_ORF2	550	>sp|P56286|IF2A_SCHPO_Eukaryotic_translation_initiation_factor_2_subunit_alpha_OS=Schizosaccharomyces_pombe_(strain_972_/_ATCC_24843)_GN=tif211_PE=1_SV=1|||9e-120	17524-591_2_ORF2	41 kDa		0.58			mapped	D8TDD1	400	D8TDD1_SELML	0	tr|D8TDD1|D8TDD1_SELML	17524-591_2_ORF2	sp|Q9SIZ2|IF2AH_ARATH	Q9SIZ2	IF2AH_ARATH	3.68985e-180
Scaffold	171437-165_2_ORF2	660	Cluster of >sp|P28011|AAT1_MEDSA_Aspartate_aminotransferase_1_OS=Medicago_sativa_GN=AAT-1_PE=2_SV=2|||0 (171437-165_2_ORF2)	171437-165_2_ORF2 [6]	47 kDa	1	0.58			mapped	D8T2G8	401	D8T2G8_SELML	0	tr|D8T2G8|D8T2G8_SELML	171437-165_2_ORF2	sp|P46644|AAT3_ARATH	P46644	AAT3_ARATH	0
Scaffold	167580-170_3_ORF1	538	no_acceptable_match|||NA	167580-170_3_ORF1	40 kDa		0.58			mapped	D8R5J0	402	D8R5J0_SELML	1.09558e-93	tr|D8R5J0|D8R5J0_SELML	167580-170_3_ORF1	sp|Q9LV09|BOB1_ARATH	Q9LV09	BOB1_ARATH	4.20007e-87
Scaffold	154825-188_3_ORF2	350	>sp|P42056|VDAC2_SOLTU_Mitochondrial_outer_membrane_protein_porin_of_36_kDa_OS=Solanum_tuberosum_PE=1_SV=2|||3e-121	154825-188_3_ORF2	30 kDa		0.58			mapped	D8RZR8	403	D8RZR8_SELML	2.71854e-122	tr|D8RZR8|D8RZR8_SELML	154825-188_3_ORF2	sp|Q9SMX3|VDAC3_ARATH	Q9SMX3	VDAC3_ARATH	1.233e-104
Scaffold	153785-190_5_ORF1	807	Cluster of >sp|Q96528|CATA1_ARATH_Catalase-1_OS=Arabidopsis_thaliana_GN=CAT1_PE=1_SV=3|||0 (153785-190_5_ORF1)	153785-190_5_ORF1 [19]	57 kDa	1	0.58			mapped	D8SAX7	404	D8SAX7_SELML	0	tr|D8SAX7|D8SAX7_SELML	153785-190_5_ORF1	sp|P25819|CATA2_ARATH	P25819	CATA2_ARATH	0
Scaffold	150412-196_1_ORF1	666	>sp|Q01908|ATPG1_ARATH_ATP_synthase_gamma_chain_1,_chloroplastic_OS=Arabidopsis_thaliana_GN=ATPC1_PE=1_SV=1|||0	150412-196_1_ORF1	47 kDa	1	0.58			mapped	D8QQG6	405	D8QQG6_SELML	0	tr|D8QQG6|D8QQG6_SELML	150412-196_1_ORF1	sp|Q01908|ATPG1_ARATH	Q01908	ATPG1_ARATH	0
Scaffold	13206-666_5_ORF2	572	>sp|Q8NBZ7|UXS1_HUMAN_UDP-glucuronic_acid_decarboxylase_1_OS=Homo_sapiens_GN=UXS1_PE=1_SV=1|||9e-147	13206-666_5_ORF2	42 kDa		0.58			mapped	D8QXD2	406	D8QXD2_SELML	0	tr|D8QXD2|D8QXD2_SELML	13206-666_5_ORF2	tr|A0A1P8B345|A0A1P8B345_ARATH	A0A1P8B345	A0A1P8B345_ARATH	0
Scaffold	10787-728_3_ORF2	199	Cluster of >sp|O65174|SODC_ZANAE_Superoxide_dismutase_[Cu-Zn]_OS=Zantedeschia_aethiopica_GN=SODCC_PE=2_SV=1|||3e-87 (10787-728_3_ORF2)	10787-728_3_ORF2 [7]	23 kDa	1	0.58			mapped	D8RT63	407	D8RT63_SELML	2.47828e-73	tr|D8RT63|D8RT63_SELML	10787-728_3_ORF2	sp|P24704|SODC1_ARATH	P24704	SODC1_ARATH	2.08718e-77
Scaffold	10512-737_4_ORF1	163	>sp|P40392|RIC1_ORYSJ_Ras-related_protein_RIC1_OS=Oryza_sativa_subsp._japonica_GN=RIC1_PE=2_SV=2|||2e-118	10512-737_4_ORF1	21 kDa		0.58			mapped	D8RP83	408	D8RP83_SELML	2.62256e-124	tr|D8RP83|D8RP83_SELML	10512-737_4_ORF1	sp|Q9FPJ4|RAD2B_ARATH	Q9FPJ4	RAD2B_ARATH	1.64868e-114
Scaffold	83096-276_3_ORF2	1066	>sp|Q9MAH0|CAPP1_ARATH_Phosphoenolpyruvate_carboxylase_1_OS=Arabidopsis_thaliana_GN=PPC1_PE=1_SV=1|||0	83096-276_3_ORF2	113 kDa	1	0.55			mapped	D8TAC4	409	D8TAC4_SELML	0	tr|D8TAC4|D8TAC4_SELML	83096-276_3_ORF2	sp|Q5GM68|CAPP2_ARATH	Q5GM68	CAPP2_ARATH	0
Scaffold	341057-47_3_ORF1	305	>sp|Q9FE01|APX2_ORYSJ_L-ascorbate_peroxidase_2,_cytosolic_OS=Oryza_sativa_subsp._japonica_GN=APX2_PE=1_SV=1|||4e-148	341057-47_3_ORF1	28 kDa	1	0.53			mapped	D8QQ91	410	D8QQ91_SELML	5.21253e-143	tr|D8QQ91|D8QQ91_SELML	341057-47_3_ORF1	sp|Q1PER6|APX2_ARATH	Q1PER6	APX2_ARATH	6.97854e-143
Scaffold	199435-138_4_ORF1	841	Cluster of >sp|Q8RWN9|OPD22_ARATH_Dihydrolipoyllysine-residue_acetyltransferase_component_2_of_pyruvate_dehydrogenase_complex,_mitochondrial_OS=Arabidopsis_thaliana_GN=At3g13930_PE=1_SV=2|||0 (199435-138_4_ORF1)	199435-138_4_ORF1 [4]	60 kDa	1	0.53			mapped	D8RIN1	411	D8RIN1_SELML	2.62007e-178	tr|D8RIN1|D8RIN1_SELML	199435-138_4_ORF1	sp|Q5M729|ODP23_ARATH	Q5M729	ODP23_ARATH	0
Scaffold	313610-61_1_ORF1	432	Cluster of >sp|Q9SN86|MDHP_ARATH_Malate_dehydrogenase,_chloroplastic_OS=Arabidopsis_thaliana_GN=At3g47520_PE=1_SV=1|||0 (313610-61_1_ORF1)	313610-61_1_ORF1 [20]	34 kDa	1	0.52			notMapped		412				313610-61_1_ORF1	sp|Q9FNM5|GUFP_ARATH	Q9FNM5	GUFP_ARATH	0
Scaffold	78297-285_4_ORF2	352	Cluster of >sp|Q9SEC2|MSRA_LACSA_Peptide_methionine_sulfoxide_reductase_OS=Lactuca_sativa_PE=2_SV=1|||4e-128 (78297-285_4_ORF2)	78297-285_4_ORF2 [4]	30 kDa	1	0.51			mapped	D8SC11	413	D8SC11_SELML	6.60868e-123	tr|D8SC11|D8SC11_SELML	78297-285_4_ORF2	sp|P54150|MSRA4_ARATH	P54150	MSRA4_ARATH	2.10471e-109
Scaffold	6621-890_2_ORF2	290	Cluster of >sp|Q9SPB3|RL10_VITRI_60S_ribosomal_protein_L10_OS=Vitis_riparia_GN=RPL10_PE=2_SV=1|||4e-151 (6621-890_2_ORF2)	6621-890_2_ORF2 [5]	27 kDa	1	0.51			mapped	D8QMU0	414	D8QMU0_SELML	1.08821e-150	tr|D8QMU0|D8QMU0_SELML	6621-890_2_ORF2	sp|Q08770|RL102_ARATH	Q08770	RL102_ARATH	2.63151e-141
Scaffold	4963-1000_4_ORF2	1058	Cluster of >sp|Q43128|PMA10_ARATH_ATPase_10,_plasma_membrane-type_OS=Arabidopsis_thaliana_GN=AHA10_PE=2_SV=2|||0 (4963-1000_4_ORF2)	4963-1000_4_ORF2 [15]	108 kDa	1	0.51			mapped	D8QT85	415	D8QT85_SELML	0	tr|D8QT85|D8QT85_SELML	4963-1000_4_ORF2	sp|Q9LV11|PMA11_ARATH	Q9LV11	PMA11_ARATH	0
Scaffold	277583-81_1_ORF2	726	Cluster of >sp|A9WT40|TAL_RENSM_Transaldolase_OS=Renibacterium_salmoninarum_(strain_ATCC_33209_/_DSM_20767_/_JCM_11484_/_NBRC_15589_/_NCIMB_2235)_GN=tal_PE=3_SV=1|||5e-112 (277583-81_1_ORF2)	277583-81_1_ORF2 [5]	51 kDa	1	0.51			mapped	D8SKM4	416	D8SKM4_SELML	0	tr|D8SKM4|D8SKM4_SELML	277583-81_1_ORF2	tr|Q9LYR4|Q9LYR4_ARATH	Q9LYR4	Q9LYR4_ARATH	0
Scaffold	239719-107_1_ORF2	678	Cluster of >sp|O23255|SAHH1_ARATH_Adenosylhomocysteinase_1_OS=Arabidopsis_thaliana_GN=SAHH1_PE=1_SV=1|||0 (239719-107_1_ORF2)	239719-107_1_ORF2 [13]	48 kDa	1	0.51			mapped	D8SW83	417	D8SW83_SELML	0	tr|D8SW83|D8SW83_SELML	239719-107_1_ORF2	sp|O23255|SAHH1_ARATH	O23255	SAHH1_ARATH	0
Scaffold	300514-68_3_ORF2	518	>sp|P43903|QOR_PSEAE_Quinone_oxidoreductase_OS=Pseudomonas_aeruginosa_(strain_ATCC_15692_/_PAO1_/_1C_/_PRS_101_/_LMG_12228)_GN=qor_PE=3_SV=2|||1e-107	300514-68_3_ORF2	39 kDa	1	0.49			mapped	D8S344	418	D8S344_SELML	4.06334e-157	tr|D8S344|D8S344_SELML	300514-68_3_ORF2	tr|A1L4Y4|A1L4Y4_ARATH	A1L4Y4	A1L4Y4_ARATH	0
Scaffold	26795-487_6_ORF2	635	Cluster of >sp|Q9LEB3|RBP47_NICPL_Polyadenylate-binding_protein_RBP47_OS=Nicotiana_plumbaginifolia_GN=RBP47_PE=1_SV=1|||4e-148 (26795-487_6_ORF2)	26795-487_6_ORF2 [5]	46 kDa	1	0.49			mapped	D8RS29	419	D8RS29_SELML	4.14512e-151	tr|D8RS29|D8RS29_SELML	26795-487_6_ORF2	sp|Q0WW84|RB47B_ARATH	Q0WW84	RB47B_ARATH	3.27083e-136
Scaffold	209284-130_2_ORF2	147	>sp|Q9SVM8|GRP2_ARATH_Glycine-rich_RNA-binding_protein_2,_mitochondrial_OS=Arabidopsis_thaliana_GN=GRP2_PE=1_SV=1|||3e-31	209284-130_2_ORF2	20 kDa	1	0.49			mapped	D8R018	420	D8R018_SELML	1.75857e-31	tr|D8R018|D8R018_SELML	209284-130_2_ORF2	sp|Q9FNR1|RBG3_ARATH	Q9FNR1	RBG3_ARATH	1.45115e-31
Scaffold	185791-151_1_ORF2	455	>sp|Q9ZWQ8|PAP_CITUN_Plastid-lipid-associated_protein,_chloroplastic_OS=Citrus_unshiu_GN=PAP_PE=2_SV=1|||7e-125	185791-151_1_ORF2	35 kDa	1	0.49			mapped	D8QPE0	421	D8QPE0_SELML	7.12412e-131	tr|D8QPE0|D8QPE0_SELML	185791-151_1_ORF2	sp|O81439|PAP1_ARATH	O81439	PAP1_ARATH	3.01094e-119
Scaffold	160113-180_2_ORF2	489	no_acceptable_match|||NA	160113-180_2_ORF2	37 kDa	1	0.49			mapped	D8RSY4	422	D8RSY4_SELML	3.41649e-157	tr|D8RSY4|D8RSY4_SELML	160113-180_2_ORF2	sp|O49485|SERA1_ARATH	O49485	SERA1_ARATH	5.56241e-153
Scaffold	134612-211_2_ORF2	824	Cluster of >sp|Q54Z26|GLYC1_DICDI_Serine_hydroxymethyltransferase_1_OS=Dictyostelium_discoideum_GN=shmt1_PE=1_SV=1|||0 (134612-211_2_ORF2)	134612-211_2_ORF2 [4]	58 kDa	1	0.49			mapped	D8SGB5	423	D8SGB5_SELML	0	tr|D8SGB5|D8SGB5_SELML	134612-211_2_ORF2	sp|Q9SZJ5|GLYM1_ARATH	Q9SZJ5	GLYM1_ARATH	0
Scaffold	117163-229_1_ORF2	317	>sp|O65282|CH10C_ARATH_20_kDa_chaperonin,_chloroplastic_OS=Arabidopsis_thaliana_GN=CPN21_PE=1_SV=2|||5e-103	117163-229_1_ORF2 (+1)	29 kDa	1	0.49			mapped	D8RH41	424	D8RH41_SELML	1.66881e-98	tr|D8RH41|D8RH41_SELML	117163-229_1_ORF2	sp|O65282|CH20_ARATH	O65282	CH20_ARATH	7.27946e-100
Scaffold	106497-241_2_ORF2	152	>sp|Q9BT04|FUZZY_HUMAN_Protein_fuzzy_homolog_OS=Homo_sapiens_GN=FUZ_PE=2_SV=1|||1e-05	106497-241_2_ORF2	20 kDa	1	0.49			notMapped		425				106497-241_2_ORF2	noOrthologue	noOrthologue	noOrthologue	notMapped
Scaffold	86488-270_3_ORF2	400	Cluster of no_acceptable_match|||NA (86488-270_3_ORF2)	86488-270_3_ORF2 [2]	33 kDa	1	0.47			mapped	D8R4N4	426	D8R4N4_SELML	9.52813e-162	tr|D8R4N4|D8R4N4_SELML	86488-270_3_ORF2	sp|Q9LZH9|RL7A2_ARATH	Q9LZH9	RL7A2_ARATH	7.62533e-154
Scaffold	114827-231_2_ORF3	732	>sp|Q9SML4|CHS1_CICAR_Chalcone_synthase_1_OS=Cicer_arietinum_GN=CHS1_PE=2_SV=1|||3e-138	114827-231_2_ORF3 (+1)	51 kDa	1	0.46			mapped	D8R0V0	427	D8R0V0_SELML	3.16177e-134	tr|D8R0V0|D8R0V0_SELML	114827-231_2_ORF3	sp|P13114|CHSY_ARATH	P13114	CHSY_ARATH	4.92869e-124
Scaffold	213962-126_2_ORF2	579	>sp|Q9ZUC1|QORL_ARATH_Quinone_oxidoreductase-like_protein_At1g23740,_chloroplastic_OS=Arabidopsis_thaliana_GN=At1g23740_PE=1_SV=2|||4e-160	213962-126_2_ORF2 (+1)	42 kDa	1	0.45			mapped	D8RIU6	428	D8RIU6_SELML	4.3824e-146	tr|D8RIU6|D8RIU6_SELML	213962-126_2_ORF2	sp|Q9ZUC1|AOR_ARATH	Q9ZUC1	AOR_ARATH	2.54732e-157
Scaffold	160475-179_4_ORF2	461	Cluster of >sp|P25387|GBLP_CHLRE_Guanine_nucleotide-binding_protein_subunit_beta-like_protein_OS=Chlamydomonas_reinhardtii_GN=GBLP_PE=2_SV=1|||0 (160475-179_4_ORF2)	160475-179_4_ORF2 [3]	36 kDa	1	0.45			mapped	D8QQ87	429	D8QQ87_SELML	4.23218e-177	tr|D8QQ87|D8QQ87_SELML	160475-179_4_ORF2	sp|Q9LV28|GPLPC_ARATH	Q9LV28	GPLPC_ARATH	2.53038e-172
Scaffold	11136-719_2_ORF2	41	>sp|Q5QM99|RL37A_ORYSJ_60S_ribosomal_protein_L37a_OS=Oryza_sativa_subsp._japonica_GN=Os01g0679700_PE=1_SV=1|||1e-62	11136-719_2_ORF2 (+2)	13 kDa	1	0.44			notMapped		430				11136-719_2_ORF2	sp|Q9ZPH2|GRS17_ARATH	Q9ZPH2	GRS17_ARATH	3.46896e-33
Scaffold	tr|Q9GER1|Q9GER1_9ERIC	650	Cluster of ATP synthase subunit beta (Fragment) OS=Samolus repens GN=atpB PE=3 SV=1 (tr|Q9GER1|Q9GER1_9ERIC)	tr|Q9GER1|Q9GER1_9ERIC [148]	46 kDa	1	0.42			mapped	D8TE87	431	D8TE87_SELML	0	tr|D8TE87|D8TE87_SELML	tr|Q9GER1|Q9GER1_9ERIC	sp|P19366|ATPB_ARATH	P19366	ATPB_ARATH	0
Scaffold	tr|D9ZJD4|D9ZJD4_MALDO	817	Cluster of T-complex protein 1 subunit delta OS=Malus domestica GN=TCP6 PE=2 SV=1 (tr|D9ZJD4|D9ZJD4_MALDO)	tr|D9ZJD4|D9ZJD4_MALDO [3]	58 kDa	1	0.42			mapped	D8RUK5	432	D8RUK5_SELML	0	tr|D8RUK5|D8RUK5_SELML	tr|D9ZJD4|D9ZJD4_MALDO	sp|Q9LV21|TCPD_ARATH	Q9LV21	TCPD_ARATH	0
Scaffold	tr|C5XKU8|C5XKU8_SORBI	535	Putative uncharacterized protein Sb03g035320 OS=Sorghum bicolor GN=Sb03g035320 PE=4 SV=1	tr|C5XKU8|C5XKU8_SORBI	40 kDa	1	0.42			mapped	D8QNK1	433	D8QNK1_SELML	0	tr|D8QNK1|D8QNK1_SELML	tr|C5XKU8|C5XKU8_SORBI	sp|Q9SRT9|RGP1_ARATH	Q9SRT9	RGP1_ARATH	0
Scaffold	tr|C0SK95|C0SK95_9CHLO	560	Cluster of Beta tubulin (Fragment) OS=Pyramimonas sp. CCMP2094 GN=btub PE=2 SV=1 (tr|C0SK95|C0SK95_9CHLO)	tr|C0SK95|C0SK95_9CHLO [12]	41 kDa	1	0.42			mapped	D8QU82	434	D8QU82_SELML	0	tr|D8QU82|D8QU82_SELML	tr|C0SK95|C0SK95_9CHLO	sp|P29516|TBB8_ARATH	P29516	TBB8_ARATH	0
Scaffold	tr|A9NLK4|A9NLK4_PICSI	255	Proteasome subunit alpha type OS=Picea sitchensis PE=2 SV=1	tr|A9NLK4|A9NLK4_PICSI	26 kDa	1	0.42			mapped	D8S7M6	435	D8S7M6_SELML	8.13874e-146	tr|D8S7M6|D8S7M6_SELML	tr|A9NLK4|A9NLK4_PICSI	sp|Q8L4A7|PSA2B_ARATH	Q8L4A7	PSA2B_ARATH	2.82278e-158
Scaffold	8000-828_5_ORF2	177	>sp|Q4UZL7|GLGB2_XANC8_1,4-alpha-glucan_branching_enzyme_GlgB_2_OS=Xanthomonas_campestris_pv._campestris_(strain_8004)_GN=glgB2_PE=3_SV=1|||1e-06	8000-828_5_ORF2	22 kDa	1	0.42			notMapped		436				8000-828_5_ORF2	noOrthologue	noOrthologue	noOrthologue	notMapped
Scaffold	43675-385_1_ORF2	993	>sp|Q67YI9|EPN2_ARATH_Clathrin_interactor_EPSIN_2_OS=Arabidopsis_thaliana_GN=EPSIN2_PE=1_SV=1|||2e-120	43675-385_1_ORF2	85 kDa	1	0.42			mapped	D8RJ51	437	D8RJ51_SELML	6.1972e-100	tr|D8RJ51|D8RJ51_SELML	43675-385_1_ORF2	sp|Q67YI9|EPN2_ARATH	Q67YI9	EPN2_ARATH	1.50573e-117
Scaffold	39126-407_1_ORF2	162	>sp|Q8LC83|RS242_ARATH_40S_ribosomal_protein_S24-2_OS=Arabidopsis_thaliana_GN=RPS24B_PE=2_SV=2|||2e-77	39126-407_1_ORF2	21 kDa	1	0.42			mapped	D8REL6	438	D8REL6_SELML	2.47521e-67	tr|D8REL6|D8REL6_SELML	39126-407_1_ORF2	sp|Q8LC83|RS242_ARATH	Q8LC83	RS242_ARATH	8.37923e-74
Scaffold	38639-409_2_ORF3	776	Cluster of >sp|B0C7T1|CHLN_ACAM1_Light-independent_protochlorophyllide_reductase_subunit_N_OS=Acaryochloris_marina_(strain_MBIC_11017)_GN=chlN_PE=3_SV=1|||0 (38639-409_2_ORF3)	38639-409_2_ORF3 [2]	54 kDa	1	0.42			mapped	C7B2K0	439	C7B2K0_SELML	0	tr|C7B2K0|C7B2K0_SELML	38639-409_2_ORF3	sp|Q93Y22|COPD_ARATH	Q93Y22	COPD_ARATH	0.156256
Scaffold	355086-41_6_ORF1	1011	>sp|Q8R146|APEH_MOUSE_Acylamino-acid-releasing_enzyme_OS=Mus_musculus_GN=Apeh_PE=2_SV=3|||8e-113	355086-41_6_ORF1	90 kDa	1	0.42			mapped	D8R6F0	440	D8R6F0_SELML	0	tr|D8R6F0|D8R6F0_SELML	355086-41_6_ORF1	sp|Q84LM4|AARE_ARATH	Q84LM4	AARE_ARATH	0
Scaffold	321113-57_3_ORF1	323	>sp|B2U092|GARL_SHIB3_5-keto-4-deoxy-D-glucarate_aldolase_OS=Shigella_boydii_serotype_18_(strain_CDC_3083-94_/_BS512)_GN=garL_PE=3_SV=1|||2e-48	321113-57_3_ORF1 (+2)	29 kDa	1	0.42			notMapped		441				321113-57_3_ORF1	tr|O82487|O82487_ARATH	O82487	O82487_ARATH	9.80959e-85
Scaffold	31125-454_1_ORF2	636	Cluster of >sp|P48391|2PS_GERHY_2-pyrone_synthase_OS=Gerbera_hybrida_GN=2PS_PE=1_SV=2|||0 (31125-454_1_ORF2)	31125-454_1_ORF2 [10]	46 kDa	1	0.42			mapped	D8R0V0	442	D8R0V0_SELML	0	tr|D8R0V0|D8R0V0_SELML	31125-454_1_ORF2	sp|P13114|CHSY_ARATH	P13114	CHSY_ARATH	0
Scaffold	24640-505_5_ORF2	552	>sp|Q7Y0B9|SAPK8_ORYSJ_Serine/threonine-protein_kinase_SAPK8_OS=Oryza_sativa_subsp._japonica_GN=SAPK8_PE=2_SV=1|||0	24640-505_5_ORF2 (+1)	41 kDa	1	0.42			mapped	D8RG24	443	D8RG24_SELML	0	tr|D8RG24|D8RG24_SELML	24640-505_5_ORF2	sp|Q940H6|SRK2E_ARATH	Q940H6	SRK2E_ARATH	0
Scaffold	238607-107_5_ORF2	277	>sp|Q58629|Y1232_METJA_Uncharacterized_protein_MJ1232_OS=Methanocaldococcus_jannaschii_(strain_ATCC_43067_/_DSM_2661_/_JAL-1_/_JCM_10045_/_NBRC_100440)_GN=MJ1232_PE=4_SV=1|||8e-20	238607-107_5_ORF2 (+2)	27 kDa	1	0.42			mapped	D8SLG7	444	D8SLG7_SELML	2.10711e-68	tr|D8SLG7|D8SLG7_SELML	238607-107_5_ORF2	sp|Q9C5D0|CBSX2_ARATH	Q9C5D0	CBSX2_ARATH	0.00017293
Scaffold	230420-113_2_ORF2	558	>sp|Q42698|GGPPS_CATRO_Geranylgeranyl_pyrophosphate_synthase,_chloroplastic_OS=Catharanthus_roseus_GN=GGPS1_PE=3_SV=1|||1e-163	230420-113_2_ORF2 (+1)	41 kDa	1	0.42			mapped	D8RDK9	445	D8RDK9_SELML	1.04223e-139	tr|D8RDK9|D8RDK9_SELML	230420-113_2_ORF2	sp|P34802|GGPP1_ARATH	P34802	GGPP1_ARATH	1.48317e-147
Scaffold	230079-113_1_ORF2	312	>sp|P0CAN7|VATE3_ARATH_V-type_proton_ATPase_subunit_E3_OS=Arabidopsis_thaliana_GN=VHA-E3_PE=2_SV=1|||4e-113	230079-113_1_ORF2 (+1)	29 kDa	1	0.42			mapped	D8RFE7	446	D8RFE7_SELML	3.85719e-104	tr|D8RFE7|D8RFE7_SELML	230079-113_1_ORF2	sp|P0CAN7|VATE3_ARATH	P0CAN7	VATE3_ARATH	6.19092e-110
Scaffold	21202-541_2_ORF1	1086	>sp|Q09996|SYLC_CAEEL_Leucine--tRNA_ligase_OS=Caenorhabditis_elegans_GN=lrs-1_PE=2_SV=2|||0	21202-541_2_ORF1 (+1)	130 kDa	1	0.42			mapped	D8QTN5	447	D8QTN5_SELML	0	tr|D8QTN5|D8QTN5_SELML	21202-541_2_ORF1	sp|F4I116|SYLC_ARATH	F4I116	SYLC_ARATH	0
Scaffold	211149-128_1_ORF1	823	Cluster of >sp|Q9LXS7|CISY1_ARATH_Citrate_synthase_1,_peroxisomal_OS=Arabidopsis_thaliana_GN=CSY1_PE=2_SV=1|||0 (211149-128_1_ORF1)	211149-128_1_ORF1 [5]	58 kDa	1	0.42			mapped	D8QQT3	448	D8QQT3_SELML	0	tr|D8QQT3|D8QQT3_SELML	211149-128_1_ORF1	sp|Q9LXS6|CISY2_ARATH	Q9LXS6	CISY2_ARATH	0
Scaffold	194452-142_3_ORF1	634	>sp|Q9XGV9|COMT2_OCIBA_Caffeic_acid_3-O-methyltransferase_2_OS=Ocimum_basilicum_GN=COMT2_PE=2_SV=1|||3e-105	194452-142_3_ORF1 (+2)	46 kDa	1	0.42			mapped	D8SXX4	449	D8SXX4_SELML	1.4427e-94	tr|D8SXX4|D8SXX4_SELML	194452-142_3_ORF1	sp|Q9FK25|OMT1_ARATH	Q9FK25	OMT1_ARATH	3.14215e-101
Scaffold	194133-143_3_ORF2	159	>sp|P58342|ATCU2_RHIME_Copper-transporting_ATPase_2_OS=Rhizobium_meliloti_(strain_1021)_GN=actP2_PE=3_SV=1|||5e-07	194133-143_3_ORF2	21 kDa	1	0.42			mapped	D8RBZ2	450	D8RBZ2_SELML	2.54357e-13	tr|D8RBZ2|D8RBZ2_SELML	194133-143_3_ORF2	tr|Q93VK7|Q93VK7_ARATH	Q93VK7	Q93VK7_ARATH	1.20181e-28
Scaffold	184149-152_1_ORF2	347	>sp|Q9BTZ2|DHRS4_HUMAN_Dehydrogenase/reductase_SDR_family_member_4_OS=Homo_sapiens_GN=DHRS4_PE=1_SV=3|||3e-83	184149-152_1_ORF2 (+1)	30 kDa	1	0.42			mapped	D8R221	451	D8R221_SELML	2.08751e-116	tr|D8R221|D8R221_SELML	184149-152_1_ORF2	sp|Q9S9W2|SDRA_ARATH	Q9S9W2	SDRA_ARATH	1.35347e-115
Scaffold	178788-157_5_ORF2	106	>sp|P13853|HS17C_ARATH_17.6_kDa_class_I_heat_shock_protein_3_OS=Arabidopsis_thaliana_GN=HSP17.6C_PE=2_SV=2|||3e-58	178788-157_5_ORF2	17 kDa	1	0.42			mapped	D8QZ48	452	D8QZ48_SELML	6.88252e-34	tr|D8QZ48|D8QZ48_SELML	178788-157_5_ORF2	sp|P13853|HS17C_ARATH	P13853	HS17C_ARATH	1.27705e-54
Scaffold	171587-165_5_ORF2	758	>sp|Q02279|PAPA5_MYCBO_Phthiocerol/phthiodiolone_dimycocerosyl_transferase_OS=Mycobacterium_bovis_(strain_ATCC_BAA-935_/_AF2122/97)_GN=papA5_PE=3_SV=2|||6e-10	171587-165_5_ORF2 (+1)	53 kDa	1	0.42			mapped	D8TGM0	453	D8TGM0_SELML	7.12401e-148	tr|D8TGM0|D8TGM0_SELML	171587-165_5_ORF2	tr|Q8H1S5|Q8H1S5_ARATH	Q8H1S5	Q8H1S5_ARATH	1.71014e-51
Scaffold	151435-194_6_ORF2	622	>sp|Q9SA14|LEU31_ARATH_3-isopropylmalate_dehydrogenase_1,_chloroplastic_OS=Arabidopsis_thaliana_GN=IMDH1_PE=1_SV=2|||0	151435-194_6_ORF2 (+1)	45 kDa	1	0.42			mapped	D8S8Y1	454	D8S8Y1_SELML	0	tr|D8S8Y1|D8S8Y1_SELML	151435-194_6_ORF2	sp|P93832|LEU32_ARATH	P93832	LEU32_ARATH	0
Scaffold	147689-200_5_ORF1	563	>sp|Q56WN1|GLN11_ARATH_Glutamine_synthetase_cytosolic_isozyme_1-1_OS=Arabidopsis_thaliana_GN=GLN1-1_PE=1_SV=2|||0	147689-200_5_ORF1	42 kDa	1	0.42			notMapped		455				147689-200_5_ORF1	noOrthologue	noOrthologue	noOrthologue	notMapped
Scaffold	146969-201_2_ORF1	215	>sp|O22478|IMA_SOLLC_Importin_subunit_alpha_OS=Solanum_lycopersicum_PE=2_SV=2|||2e-65	146969-201_2_ORF1 (+2)	24 kDa	1	0.42			mapped	D8QMK6	456	D8QMK6_SELML	8.80485e-63	tr|D8QMK6|D8QMK6_SELML	146969-201_2_ORF1	sp|F4JL11|IMPA2_ARATH	F4JL11	IMPA2_ARATH	6.0029e-61
Scaffold	135690-210_1_ORF2	587	Cluster of >sp|Q9SJU4|ALFC1_ARATH_Probable_fructose-bisphosphate_aldolase_1,_chloroplastic_OS=Arabidopsis_thaliana_GN=FBA1_PE=1_SV=2|||0 (135690-210_1_ORF2)	135690-210_1_ORF2 [18]	43 kDa	1	0.42			mapped	D8RHD1	457	D8RHD1_SELML	0	tr|D8RHD1|D8RHD1_SELML	135690-210_1_ORF2	sp|Q9ZU52|ALFP3_ARATH	Q9ZU52	ALFP3_ARATH	0
Scaffold	117171-229_3_ORF2	677	>sp|O27555|ARSA_METTH_Putative_arsenical_pump-driving_ATPase_OS=Methanothermobacter_thermautotrophicus_(strain_ATCC_29096_/_DSM_1053_/_JCM_10044_/_NBRC_100330_/_Delta_H)_GN=MTH_1511_PE=1_SV=1|||5e-57	117171-229_3_ORF2	48 kDa	1	0.42			mapped	D8RTG3	458	D8RTG3_SELML	0	tr|D8RTG3|D8RTG3_SELML	117171-229_3_ORF2	tr|A1L4Y1|A1L4Y1_ARATH	A1L4Y1	A1L4Y1_ARATH	0
Scaffold	11320-714_2_ORF2	258	>sp|Q9XJ27|RR9_ARATH_30S_ribosomal_protein_S9,_chloroplastic_OS=Arabidopsis_thaliana_GN=RPS9_PE=2_SV=1|||4e-80	11320-714_2_ORF2	26 kDa	1	0.42			mapped	D8RC23	459	D8RC23_SELML	6.49022e-75	tr|D8RC23|D8RC23_SELML	11320-714_2_ORF2	sp|Q9XJ27|RR9_ARATH	Q9XJ27	RR9_ARATH	1.03168e-76
Scaffold	tr|G7INH6|G7INH6_MEDTR	890	Cluster of Elongation factor 1-alpha OS=Medicago truncatula GN=MTR_2g037420 PE=4 SV=1 (tr|G7INH6|G7INH6_MEDTR)	tr|G7INH6|G7INH6_MEDTR [33]	65 kDa	1	0.41			mapped	D8RH56	460	D8RH56_SELML	0	tr|D8RH56|D8RH56_SELML	tr|G7INH6|G7INH6_MEDTR	sp|Q8GTY0|EF1A4_ARATH	Q8GTY0	EF1A4_ARATH	0
Scaffold	150759-196_2_ORF2	546	Cluster of >sp|Q9LRR9|GLO1_ARATH_Peroxisomal_(S)-2-hydroxy-acid_oxidase_GLO1_OS=Arabidopsis_thaliana_GN=GLO1_PE=1_SV=1|||0 (150759-196_2_ORF2)	150759-196_2_ORF2 [10]	41 kDa	1	0.4			mapped	D8QNN2	461	D8QNN2_SELML	0	tr|D8QNN2|D8QNN2_SELML	150759-196_2_ORF2	sp|Q9LRR9|GLO1_ARATH	Q9LRR9	GLO1_ARATH	0
Scaffold	tr|Q5EP57|Q5EP57_9MARC	979	Cluster of Phenylalanine ammonia-lyase (Fragment) OS=Pellia epiphylla GN=PAL PE=2 SV=1 (tr|Q5EP57|Q5EP57_9MARC)	tr|Q5EP57|Q5EP57_9MARC [17]	81 kDa	1	0.39			mapped	D8SER3	462	D8SER3_SELML	0	tr|D8SER3|D8SER3_SELML	tr|Q5EP57|Q5EP57_9MARC	sp|Q9SS45|PAL4_ARATH	Q9SS45	PAL4_ARATH	0
Scaffold	275558-83_2_ORF2	356	>sp|Q04836|ROC3_ARATH_31_kDa_ribonucleoprotein,_chloroplastic_OS=Arabidopsis_thaliana_GN=RBP31_PE=1_SV=1|||2e-64	275558-83_2_ORF2 (+1)	30 kDa	1	0.39			mapped	D8TAY9	463	D8TAY9_SELML	5.93043e-62	tr|D8TAY9|D8TAY9_SELML	275558-83_2_ORF2	sp|Q04836|CP31A_ARATH	Q04836	CP31A_ARATH	6.2271e-61
Scaffold	tr|O24500|O24500_ARATH	307	Glycolate oxidase (Fragment) OS=Arabidopsis thaliana PE=2 SV=1	tr|O24500|O24500_ARATH	28 kDa	1	0.38			mapped	D8QNN2	464	D8QNN2_SELML	1.03254e-140	tr|D8QNN2|D8QNN2_SELML	tr|O24500|O24500_ARATH	sp|Q9LRS0|GLO2_ARATH	Q9LRS0	GLO2_ARATH	0
Scaffold	69610-303_2_ORF2	426	>sp|Q31BC3|EFTS_PROM9_Elongation_factor_Ts_OS=Prochlorococcus_marinus_(strain_MIT_9312)_GN=tsf_PE=3_SV=1|||2e-99	69610-303_2_ORF2	33 kDa	1	0.36			mapped	D8QTN3	465	D8QTN3_SELML	1.20594e-94	tr|D8QTN3|D8QTN3_SELML	69610-303_2_ORF2	tr|Q9SZD6|Q9SZD6_ARATH	Q9SZD6	Q9SZD6_ARATH	2.22014e-101
Scaffold	5303-978_1_ORF2	216	Cluster of >sp|Q9AXQ5|IF5A2_SOLLC_Eukaryotic_translation_initiation_factor_5A-2_OS=Solanum_lycopersicum_PE=2_SV=1|||8e-102 (5303-978_1_ORF2)	5303-978_1_ORF2 [15]	24 kDa	1	0.35			mapped	D8R032	466	D8R032_SELML	1.88767e-92	tr|D8R032|D8R032_SELML	5303-978_1_ORF2	sp|Q9C505|IF5A3_ARATH	Q9C505	IF5A3_ARATH	5.49563e-89
Scaffold	45770-376_1_ORF2	238	Cluster of >sp|Q9LXG1|RS91_ARATH_40S_ribosomal_protein_S9-1_OS=Arabidopsis_thaliana_GN=RPS9B_PE=1_SV=1|||9e-125 (45770-376_1_ORF2)	45770-376_1_ORF2 [8]	25 kDa	1	0.35			mapped	D8SPS2	467	D8SPS2_SELML	3.20148e-121	tr|D8SPS2|D8SPS2_SELML	45770-376_1_ORF2	sp|Q9LXG1|RS91_ARATH	Q9LXG1	RS91_ARATH	1.32248e-121
Scaffold	189214-147_1_ORF1	211	>sp|P31170|HS25P_ARATH_25.3_kDa_heat_shock_protein,_chloroplastic_OS=Arabidopsis_thaliana_GN=HSP25.3_PE=2_SV=1|||6e-40	189214-147_1_ORF1	23 kDa	1	0.35			mapped	D8QTW2	468	D8QTW2_SELML	1.12503e-34	tr|D8QTW2|D8QTW2_SELML	189214-147_1_ORF1	sp|P31170|HS25P_ARATH	P31170	HS25P_ARATH	4.2496e-36
Scaffold	tr|G7JG11|G7JG11_MEDTR	1001	Photosystem II D2 protein OS=Medicago truncatula GN=MTR_4g051180 PE=3 SV=1	tr|G7JG11|G7JG11_MEDTR (+1)	88 kDa	1	0.32			notMapped		469				tr|G7JG11|G7JG11_MEDTR	sp|Q27GK7|TPR4_ARATH	Q27GK7	TPR4_ARATH	0
Scaffold	tr|F2DY57|F2DY57_HORVD	723	Cluster of Predicted protein OS=Hordeum vulgare var. distichum PE=2 SV=1 (tr|F2DY57|F2DY57_HORVD)	tr|F2DY57|F2DY57_HORVD [4]	51 kDa	1	0.32			mapped	D8RLY3	470	D8RLY3_SELML	0	tr|D8RLY3|D8RLY3_SELML	tr|F2DY57|F2DY57_HORVD	sp|Q9C9C4|ENO1_ARATH	Q9C9C4	ENO1_ARATH	0
Scaffold	tr|E1Z382|E1Z382_CHLVA	628	Cluster of Putative uncharacterized protein OS=Chlorella variabilis GN=CHLNCDRAFT_33640 PE=3 SV=1 (tr|E1Z382|E1Z382_CHLVA)	tr|E1Z382|E1Z382_CHLVA [6]	46 kDa	1	0.32			mapped	D8R3T7	471	D8R3T7_SELML	8.96661e-177	tr|D8R3T7|D8R3T7_SELML	tr|E1Z382|E1Z382_CHLVA	sp|Q9M084|SYDC2_ARATH	Q9M084	SYDC2_ARATH	0
Scaffold	78122-285_4_ORF2	620	>sp|Q93Y35|PSMD6_ARATH_Probable_26S_proteasome_non-ATPase_regulatory_subunit_6_OS=Arabidopsis_thaliana_GN=At4g24820_PE=2_SV=1|||0	78122-285_4_ORF2	45 kDa	1	0.32			mapped	D8RSJ5	472	D8RSJ5_SELML	0	tr|D8RSJ5|D8RSJ5_SELML	78122-285_4_ORF2	sp|Q93Y35|PSMD6_ARATH	Q93Y35	PSMD6_ARATH	0
Scaffold	64-3566_3_ORF2	1069	Cluster of >sp|P31541|CLPAA_SOLLC_ATP-dependent_Clp_protease_ATP-binding_subunit_clpA_homolog_CD4A,_chloroplastic_OS=Solanum_lycopersicum_GN=CD4A_PE=3_SV=1|||0 (64-3566_3_ORF2)	64-3566_3_ORF2 [18]	114 kDa	1	0.32			mapped	D8RV14	473	D8RV14_SELML	0	tr|D8RV14|D8RV14_SELML	64-3566_3_ORF2	sp|Q9LF37|CLPB3_ARATH	Q9LF37	CLPB3_ARATH	0
Scaffold	59309-329_5_ORF1	820	>sp|A9XLE1|PURA1_CAPFR_Adenylosuccinate_synthetase_1,_chloroplastic_OS=Capsicum_frutescens_GN=PURA1_PE=3_SV=1|||0	59309-329_5_ORF1 (+1)	58 kDa	1	0.32			mapped	D8RGZ6	474	D8RGZ6_SELML	0	tr|D8RGZ6|D8RGZ6_SELML	59309-329_5_ORF1	sp|Q96529|PURA_ARATH	Q96529	PURA_ARATH	0
Scaffold	214868-125_3_ORF2	242	>sp|O22160|TL15A_ARATH_Thylakoid_lumenal_15_kDa_protein_1,_chloroplastic_OS=Arabidopsis_thaliana_GN=At2g44920_PE=1_SV=2|||5e-85	214868-125_3_ORF2	25 kDa	1	0.32			mapped	D8SBX7	475	D8SBX7_SELML	9.49238e-82	tr|D8SBX7|D8SBX7_SELML	214868-125_3_ORF2	sp|O22160|TL15A_ARATH	O22160	TL15A_ARATH	1.00681e-81
Scaffold	107383-240_2_ORF2	131	>sp|O81372|NDK1_MESCR_Nucleoside_diphosphate_kinase_1_OS=Mesembryanthemum_crystallinum_GN=NDKP1_PE=2_SV=1|||6e-86	107383-240_2_ORF2	19 kDa	1	0.32			mapped	D8RHN0	476	D8RHN0_SELML	5.79642e-85	tr|D8RHN0|D8RHN0_SELML	107383-240_2_ORF2	sp|P39207|NDK1_ARATH	P39207	NDK1_ARATH	8.60624e-82
Scaffold	tr|O82565|O82565_ANEPH	565	Cluster of Actin 3 OS=Anemia phyllitidis PE=2 SV=1 (tr|O82565|O82565_ANEPH)	tr|O82565|O82565_ANEPH [32]	42 kDa	1	0.3			mapped	D8S0X0	477	D8S0X0_SELML	0	tr|D8S0X0|D8S0X0_SELML	tr|O82565|O82565_ANEPH	sp|P53492|ACT7_ARATH	P53492	ACT7_ARATH	0
Scaffold	281930-79_1_ORF1	178	Cluster of >sp|Q40250|RBS_LACSA_Ribulose_bisphosphate_carboxylase_small_chain,_chloroplastic_OS=Lactuca_sativa_GN=RBCS_PE=2_SV=1|||6e-70 (281930-79_1_ORF1)	281930-79_1_ORF1 [2]	22 kDa	1	0.3			mapped	D8T7L5	478	D8T7L5_SELML	4.44241e-64	tr|D8T7L5|D8T7L5_SELML	281930-79_1_ORF1	sp|P10797|RBS2B_ARATH	P10797	RBS2B_ARATH	2.1032e-62
Scaffold	4641-1023_4_ORF2	581	>sp|Q41738|THI41_MAIZE_Thiamine_thiazole_synthase_1,_chloroplastic_OS=Zea_mays_GN=THI1-1_PE=2_SV=1|||0	4641-1023_4_ORF2	42 kDa	1	0.29			mapped	D8RPN5	479	D8RPN5_SELML	0	tr|D8RPN5|D8RPN5_SELML	4641-1023_4_ORF2	sp|Q38814|THI4_ARATH	Q38814	THI4_ARATH	0
Scaffold	318906-58_1_ORF1	929	no_acceptable_match|||NA	318906-58_1_ORF1	70 kDa	1	0.29			mapped	D8S9G0	480	D8S9G0_SELML	0	tr|D8S9G0|D8S9G0_SELML	318906-58_1_ORF1	sp|Q39161|NIR_ARATH	Q39161	NIR_ARATH	0
Scaffold	2766-1247_4_ORF2	196	Cluster of >sp|P37560|YABR_BACSU_Uncharacterized_protein_YabR_OS=Bacillus_subtilis_(strain_168)_GN=yabR_PE=3_SV=1|||1e-06 (2766-1247_4_ORF2)	2766-1247_4_ORF2 [2]	22 kDa	1	0.29			notMapped		481				2766-1247_4_ORF2	noOrthologue	noOrthologue	noOrthologue	notMapped
Scaffold	68626-305_4_ORF2	315	Cluster of >sp|Q9M4T8|PSA5_SOYBN_Proteasome_subunit_alpha_type-5_OS=Glycine_max_GN=PAE1_PE=2_SV=1|||1e-164 (68626-305_4_ORF2)	68626-305_4_ORF2 [2]	29 kDa	1	0.28			mapped	D8RG02	482	D8RG02_SELML	1.69865e-160	tr|D8RG02|D8RG02_SELML	68626-305_4_ORF2	sp|Q42134|PSA5B_ARATH	Q42134	PSA5B_ARATH	4.67755e-158
Scaffold	7073-864_3_ORF1	270	>sp|O23708|PSA2A_ARATH_Proteasome_subunit_alpha_type-2-A_OS=Arabidopsis_thaliana_GN=PAB1_PE=1_SV=1|||5e-161	7073-864_3_ORF1	26 kDa	1	0.26			mapped	D8S7M6	483	D8S7M6_SELML	2.39812e-148	tr|D8S7M6|D8S7M6_SELML	7073-864_3_ORF1	sp|O23708|PSA2A_ARATH	O23708	PSA2A_ARATH	4.87133e-158
Scaffold	34321-433_4_ORF2	729	no_acceptable_match|||NA	34321-433_4_ORF2	51 kDa	1	0.26			mapped	D8SB71	484	D8SB71_SELML	8.17435e-127	tr|D8SB71|D8SB71_SELML	34321-433_4_ORF2	tr|A0A1P8AWD7|A0A1P8AWD7_ARATH	A0A1P8AWD7	A0A1P8AWD7_ARATH	9.61436e-06
Scaffold	27371-482_6_ORF2	109	>sp|Q25AG5|ERG3_ORYSI_Elicitor-responsive_protein_3_OS=Oryza_sativa_subsp._indica_GN=ERG3_PE=2_SV=1|||3e-32	27371-482_6_ORF2	17 kDa	1	0.26			mapped	D8RPH2	485	D8RPH2_SELML	1.30303e-37	tr|D8RPH2|D8RPH2_SELML	27371-482_6_ORF2	sp|Q9C8S6|PP16B_ARATH	Q9C8S6	PP16B_ARATH	6.17516e-26
Scaffold	156068-186_5_ORF2	198	>sp|Q10121|YSD2_CAEEL_RutC_family_protein_C23G10.2_OS=Caenorhabditis_elegans_GN=C23G10.2_PE=2_SV=3|||5e-48	156068-186_5_ORF2	23 kDa	1	0.26			mapped	D8RS37	486	D8RS37_SELML	9.36456e-74	tr|D8RS37|D8RS37_SELML	156068-186_5_ORF2	sp|Q94JQ4|RIDA_ARATH	Q94JQ4	RIDA_ARATH	1.17959e-70
Scaffold	152853-192_1_ORF2	889	>sp|Q10318|ILV3_SCHPO_Putative_dihydroxy-acid_dehydratase,_mitochondrial_OS=Schizosaccharomyces_pombe_(strain_972_/_ATCC_24843)_GN=SPAC17G8.06c_PE=2_SV=1|||0	152853-192_1_ORF2	65 kDa	1	0.26			mapped	D8QVL8	487	D8QVL8_SELML	0	tr|D8QVL8|D8QVL8_SELML	152853-192_1_ORF2	sp|Q9LIR4|ILVD_ARATH	Q9LIR4	ILVD_ARATH	0
Scaffold	148668-200_2_ORF1	829	Cluster of >sp|Q9CA67|CHLP_ARATH_Geranylgeranyl_diphosphate_reductase,_chloroplastic_OS=Arabidopsis_thaliana_GN=CHLP_PE=1_SV=1|||0 (148668-200_2_ORF1)	148668-200_2_ORF1 [3]	59 kDa	1	0.26			mapped	D8RX83	488	D8RX83_SELML	0	tr|D8RX83|D8RX83_SELML	148668-200_2_ORF1	sp|Q9CA67|CHLP_ARATH	Q9CA67	CHLP_ARATH	0
Scaffold	131087-214_1_ORF2	146	>sp|P64741|Y887_MYCTU_Uncharacterized_protein_Rv0887c/MT0910_OS=Mycobacterium_tuberculosis_GN=Rv0887c_PE=4_SV=1|||6e-33	131087-214_1_ORF2	20 kDa	1	0.26			mapped	D8RQD8	489	D8RQD8_SELML	6.40316e-57	tr|D8RQD8|D8RQD8_SELML	131087-214_1_ORF2	sp|Q9LV66|Y5848_ARATH	Q9LV66	Y5848_ARATH	6.38013e-21
Scaffold	118026-228_6_ORF2	56	>sp|A0AT29|NLTP2_LENCU_Non-specific_lipid-transfer_protein_2_OS=Lens_culinaris_PE=1_SV=1|||1e-27	118026-228_6_ORF2	14 kDa	1	0.26			notMapped		490				118026-228_6_ORF2	sp|Q9LLR6|NLTP4_ARATH	Q9LLR6	NLTP4_ARATH	2.03896e-20
Scaffold	172805-164_1_ORF2	291	>sp|P31170|HS25P_ARATH_25.3_kDa_heat_shock_protein,_chloroplastic_OS=Arabidopsis_thaliana_GN=HSP25.3_PE=2_SV=1|||9e-38	172805-164_1_ORF2	27 kDa	1	0.24			mapped	D8RJR5	491	D8RJR5_SELML	2.57555e-31	tr|D8RJR5|D8RJR5_SELML	172805-164_1_ORF2	sp|P31170|HS25P_ARATH	P31170	HS25P_ARATH	7.92044e-34
Scaffold	48604-365_5_ORF2	1017	>sp|P36183|ENPL_HORVU_Endoplasmin_homolog_OS=Hordeum_vulgare_PE=2_SV=1|||0	48604-365_5_ORF2	93 kDa	1	0.23			mapped	D8TAK0	492	D8TAK0_SELML	0	tr|D8TAK0|D8TAK0_SELML	48604-365_5_ORF2	sp|Q9SIF2|HS905_ARATH	Q9SIF2	HS905_ARATH	0
Scaffold	93202-259_3_ORF2	998	Cluster of >sp|Q2IJ93|EFG1_ANADE_Elongation_factor_G_1_OS=Anaeromyxobacter_dehalogenans_(strain_2CP-C)_GN=fusA1_PE=3_SV=1|||0 (93202-259_3_ORF2)	93202-259_3_ORF2 [2]	87 kDa	1	0.22			mapped	D8RK56	493	D8RK56_SELML	0	tr|D8RK56|D8RK56_SELML	93202-259_3_ORF2	sp|Q9SI75|EFGC_ARATH	Q9SI75	EFGC_ARATH	0
Scaffold	3307-1172_3_ORF3	416	>sp|Q9SKT0|THF1_ARATH_Protein_THYLAKOID_FORMATION_1,_chloroplastic_OS=Arabidopsis_thaliana_GN=THF1_PE=1_SV=1|||2e-108	3307-1172_3_ORF3	33 kDa	1	0.22			mapped	D8SQ91	494	D8SQ91_SELML	1.02011e-116	tr|D8SQ91|D8SQ91_SELML	3307-1172_3_ORF3	sp|Q9SKT0|THF1_ARATH	Q9SKT0	THF1_ARATH	2.44502e-105
Scaffold	307966-64_2_ORF2	751	Cluster of >sp|P40370|ENO11_SCHPO_Enolase_1-1_OS=Schizosaccharomyces_pombe_(strain_972_/_ATCC_24843)_GN=eno101_PE=1_SV=2|||0 (307966-64_2_ORF2)	307966-64_2_ORF2 [2]	52 kDa	1	0.22			mapped	D8QU68	495	D8QU68_SELML	0	tr|D8QU68|D8QU68_SELML	307966-64_2_ORF2	sp|Q9ZW34|ENO3_ARATH	Q9ZW34	ENO3_ARATH	0
Scaffold	23928-513_3_ORF1	365	>sp|Q9XG77|PSA6_TOBAC_Proteasome_subunit_alpha_type-6_OS=Nicotiana_tabacum_GN=PAA1_PE=2_SV=1|||1e-157	23928-513_3_ORF1	31 kDa	1	0.22			mapped	D8T290	496	D8T290_SELML	4.84578e-158	tr|D8T290|D8T290_SELML	23928-513_3_ORF1	sp|O81147|PSA6B_ARATH	O81147	PSA6B_ARATH	9.66487e-153
Scaffold	181563-155_3_ORF2	812	>sp|Q3MBJ4|GLGC_ANAVT_Glucose-1-phosphate_adenylyltransferase_OS=Anabaena_variabilis_(strain_ATCC_29413_/_PCC_7937)_GN=glgC_PE=3_SV=1|||0	181563-155_3_ORF2	57 kDa	1	0.22			mapped	D8TFY1	497	D8TFY1_SELML	0	tr|D8TFY1|D8TFY1_SELML	181563-155_3_ORF2	sp|P55229|GLGL1_ARATH	P55229	GLGL1_ARATH	0
Scaffold	369283-36_1_ORF1	790	Cluster of >sp|P48644|AL1A1_BOVIN_Retinal_dehydrogenase_1_OS=Bos_taurus_GN=ALDH1A1_PE=2_SV=3|||0 (369283-36_1_ORF1)	369283-36_1_ORF1 [9]	56 kDa	1	0.2			mapped	D8QNT7	498	D8QNT7_SELML	0	tr|D8QNT7|D8QNT7_SELML	369283-36_1_ORF1	sp|Q8S528|AL2B7_ARATH	Q8S528	AL2B7_ARATH	0
Scaffold	306456-65_2_ORF1	877	Cluster of >sp|P20075|LEAD8_DAUCA_Embryonic_protein_DC-8_OS=Daucus_carota_PE=3_SV=1|||2e-20 (306456-65_2_ORF1)	306456-65_2_ORF1 [2]	64 kDa	1	0.2			mapped	D8QUA4	499	D8QUA4_SELML	1.63017e-29	tr|D8QUA4|D8QUA4_SELML	306456-65_2_ORF1	tr|F4IQI5|F4IQI5_ARATH	F4IQI5	F4IQI5_ARATH	2.97097e-24
Scaffold	23083-521_3_ORF2	200	>sp|O65729|RL18_CICAR_60S_ribosomal_protein_L18_(Fragment)_OS=Cicer_arietinum_GN=RPL18_PE=2_SV=1|||1e-109	23083-521_3_ORF2	23 kDa	1	0.2			mapped	D8RZ48	500	D8RZ48_SELML	4.52627e-106	tr|D8RZ48|D8RZ48_SELML	23083-521_3_ORF2	sp|P42791|RL182_ARATH	P42791	RL182_ARATH	1.03387e-105
Scaffold	5327-976_2_ORF1	375	>sp|O04130|SERA_ARATH_D-3-phosphoglycerate_dehydrogenase,_chloroplastic_OS=Arabidopsis_thaliana_GN=At1g17745_PE=1_SV=2|||3e-142	5327-976_2_ORF1 (+1)	31 kDa	1	0.19			mapped	D8RSY4	501	D8RSY4_SELML	3.1273e-157	tr|D8RSY4|D8RSY4_SELML	5327-976_2_ORF1	sp|O49485|SERA1_ARATH	O49485	SERA1_ARATH	4.04623e-151
Scaffold	7843-835_1_ORF2	661	Cluster of >sp|O13285|IDH1_CANTR_Isocitrate_dehydrogenase_[NADP],_mitochondrial_OS=Candida_tropicalis_GN=IDP1_PE=3_SV=1|||0 (7843-835_1_ORF2)	7843-835_1_ORF2 [8]	47 kDa	1	0.17			mapped	D8RFG1	502	D8RFG1_SELML	0	tr|D8RFG1|D8RFG1_SELML	7843-835_1_ORF2	sp|Q9SRZ6|ICDHC_ARATH	Q9SRZ6	ICDHC_ARATH	0
Scaffold	6912-873_2_ORF2	697	Cluster of >sp|Q9C5U3|PRS8A_ARATH_26S_protease_regulatory_subunit_8_homolog_A_OS=Arabidopsis_thaliana_GN=RPT6A_PE=2_SV=1|||0 (6912-873_2_ORF2)	6912-873_2_ORF2 [5]	49 kDa	1	0.17			mapped	D8RGS0	503	D8RGS0_SELML	0	tr|D8RGS0|D8RGS0_SELML	6912-873_2_ORF2	sp|Q9C5U3|PRS8A_ARATH	Q9C5U3	PRS8A_ARATH	0
Scaffold	2121-1366_3_ORF2	525	Cluster of >sp|Q9SF85|ADK1_ARATH_Adenosine_kinase_1_OS=Arabidopsis_thaliana_GN=ADK1_PE=1_SV=1|||0 (2121-1366_3_ORF2)	2121-1366_3_ORF2 [3]	39 kDa	1	0.17			mapped	D8SDY7	504	D8SDY7_SELML	0	tr|D8SDY7|D8SDY7_SELML	2121-1366_3_ORF2	sp|Q9SF85|ADK1_ARATH	Q9SF85	ADK1_ARATH	0
Scaffold	14462-637_1_ORF2	231	>sp|O23714|PSB2A_ARATH_Proteasome_subunit_beta_type-2-A_OS=Arabidopsis_thaliana_GN=PBD1_PE=1_SV=1|||8e-107	14462-637_1_ORF2	24 kDa	1	0.17			mapped	D8QT24	505	D8QT24_SELML	1.09873e-101	tr|D8QT24|D8QT24_SELML	14462-637_1_ORF2	sp|O23714|PSB2A_ARATH	O23714	PSB2A_ARATH	1.42529e-103
Scaffold	1-12177_3_ORF3	119	Cluster of >sp|Q85FL4|ATPE_ADICA_ATP_synthase_epsilon_chain,_chloroplastic_OS=Adiantum_capillus-veneris_GN=atpE_PE=2_SV=2|||2e-79 (1-12177_3_ORF3)	1-12177_3_ORF3 [2]	18 kDa	1	0.17			mapped	C7B2G0	506	C7B2G0_SELML	1.74284e-46	tr|C7B2G0|C7B2G0_SELML	1-12177_3_ORF3	sp|P09468|ATPE_ARATH	P09468	ATPE_ARATH	2.0591e-58
Scaffold	88372-267_5_ORF2	810	Cluster of >sp|O65595|KPYC_ARATH_Probable_pyruvate_kinase,_cytosolic_isozyme_OS=Arabidopsis_thaliana_GN=At4g26390_PE=2_SV=1|||0 (88372-267_5_ORF2)	88372-267_5_ORF2 [8]	57 kDa	1	0.15			mapped	D8SKP8	507	D8SKP8_SELML	0	tr|D8SKP8|D8SKP8_SELML	88372-267_5_ORF2	tr|Q9FFP6|Q9FFP6_ARATH	Q9FFP6	Q9FFP6_ARATH	0
Scaffold	23981-512_3_ORF1	1028	Cluster of >sp|Q38882|PLDA1_ARATH_Phospholipase_D_alpha_1_OS=Arabidopsis_thaliana_GN=PLDALPHA1_PE=1_SV=2|||0 (23981-512_3_ORF1)	23981-512_3_ORF1 [2]	95 kDa	1	0.15			mapped	D8RMV6	508	D8RMV6_SELML	0	tr|D8RMV6|D8RMV6_SELML	23981-512_3_ORF1	sp|Q38882|PLDA1_ARATH	Q38882	PLDA1_ARATH	0
Scaffold	6809-878_4_ORF2	444	>sp|Q6UNT2|RL5_CUCSA_60S_ribosomal_protein_L5_OS=Cucumis_sativus_GN=RPL5_PE=2_SV=1|||4e-161	6809-878_4_ORF2	35 kDa	1	0.14			mapped	D8R9P8	509	D8R9P8_SELML	1.90581e-152	tr|D8R9P8|D8R9P8_SELML	6809-878_4_ORF2	sp|P49227|RL52_ARATH	P49227	RL52_ARATH	1.08999e-153
Scaffold	26640-489_1_ORF2	143	>sp|A5GNB0|CH10_SYNPW_10_kDa_chaperonin_OS=Synechococcus_sp._(strain_WH7803)_GN=groS_PE=3_SV=1|||6e-15	26640-489_1_ORF2	19 kDa	1	0.13			mapped	D8T688	510	D8T688_SELML	3.23516e-43	tr|D8T688|D8T688_SELML	26640-489_1_ORF2	sp|Q9M1C2|CH101_ARATH	Q9M1C2	CH101_ARATH	9.48447e-39
Scaffold	177140-159_2_ORF1	774	Cluster of >sp|Q08637|NTPB_ENTHA_V-type_sodium_ATPase_subunit_B_OS=Enterococcus_hirae_(strain_ATCC_9790_/_DSM_20160_/_JCM_8729_/_LMG_6399_/_NBRC_3181_/_NCIMB_6459_/_NCDO_1258)_GN=ntpB_PE=1_SV=1|||0 (177140-159_2_ORF1)	177140-159_2_ORF1 [7]	54 kDa	1	0.13			mapped	D8SQC5	511	D8SQC5_SELML	0	tr|D8SQC5|D8SQC5_SELML	177140-159_2_ORF1	tr|F4JTQ0|F4JTQ0_ARATH	F4JTQ0	F4JTQ0_ARATH	0
Scaffold	tr|B9RUZ2|B9RUZ2_RICCO	60	Cluster of Histone H2A OS=Ricinus communis GN=RCOM_0897270 PE=3 SV=1 (tr|B9RUZ2|B9RUZ2_RICCO)	tr|B9RUZ2|B9RUZ2_RICCO [17]	14 kDa	1	0.12			mapped	D8SQE3	512	D8SQE3_SELML	2.39565e-77	tr|D8SQE3|D8SQE3_SELML	tr|B9RUZ2|B9RUZ2_RICCO	sp|Q9C944|H2AV3_ARATH	Q9C944	H2AV3_ARATH	6.67495e-76
Scaffold	139931-207_5_ORF1	398	>sp|O04603|RK5_ARATH_50S_ribosomal_protein_L5,_chloroplastic_OS=Arabidopsis_thaliana_GN=RPL5_PE=1_SV=1|||1e-95	139931-207_5_ORF1	32 kDa	1	0.12			mapped	D8QYI4	513	D8QYI4_SELML	9.96579e-93	tr|D8QYI4|D8QYI4_SELML	139931-207_5_ORF1	sp|O04603|RK5_ARATH	O04603	RK5_ARATH	2.4134e-92
Scaffold	170504-166_2_ORF2	864	>sp|P30184|AMPL1_ARATH_Leucine_aminopeptidase_1_OS=Arabidopsis_thaliana_GN=PM25_PE=1_SV=1|||0	170504-166_2_ORF2	63 kDa	1	0.11			mapped	D8R1F7	514	D8R1F7_SELML	0	tr|D8R1F7|D8R1F7_SELML	170504-166_2_ORF2	sp|Q944P7|AMPL2_ARATH	Q944P7	AMPL2_ARATH	0
Scaffold	85783-271_1_ORF2	450	>sp|P52578|IFRH_SOLTU_Isoflavone_reductase_homolog_OS=Solanum_tuberosum_PE=2_SV=1|||3e-117	85783-271_1_ORF2	35 kDa	1	0.1			mapped	D8SZ88	515	D8SZ88_SELML	1.60973e-116	tr|D8SZ88|D8SZ88_SELML	85783-271_1_ORF2	sp|Q9T030|PBER1_ARATH	Q9T030	PBER1_ARATH	4.02829e-115
Scaffold	49804-360_4_ORF2	630	Cluster of >sp|P25856|G3PA_ARATH_Glyceraldehyde-3-phosphate_dehydrogenase_A,_chloroplastic_OS=Arabidopsis_thaliana_GN=GAPA_PE=1_SV=3|||0 (49804-360_4_ORF2)	49804-360_4_ORF2 [30]	46 kDa	1	0.1			mapped	D8SPI9	516	D8SPI9_SELML	0	tr|D8SPI9|D8SPI9_SELML	49804-360_4_ORF2	tr|A0A1P8APR6|A0A1P8APR6_ARATH	A0A1P8APR6	A0A1P8APR6_ARATH	0
Scaffold	36369-420_5_ORF2	478	>sp|Q8LJS2|HDT1_SOYBN_Histone_deacetylase_HDT1_OS=Glycine_max_GN=HDT1_PE=2_SV=1|||1e-41	36369-420_5_ORF2 (+1)	36 kDa	1	0.09			mapped	D8T873	517	D8T873_SELML	3.30984e-28	tr|D8T873|D8T873_SELML	36369-420_5_ORF2	sp|Q9LZR5|HDT3_ARATH	Q9LZR5	HDT3_ARATH	3.02405e-25
Scaffold	20213-554_2_ORF1	566	Cluster of >sp|Q9SLA8|FABI_ARATH_Enoyl-[acyl-carrier-protein]_reductase_[NADH],_chloroplastic_OS=Arabidopsis_thaliana_GN=MOD1_PE=1_SV=1|||0 (20213-554_2_ORF1)	20213-554_2_ORF1 [6]	42 kDa	1	0.09			mapped	D8RNK6	518	D8RNK6_SELML	8.21749e-178	tr|D8RNK6|D8RNK6_SELML	20213-554_2_ORF1	sp|Q9SLA8|FABI_ARATH	Q9SLA8	FABI_ARATH	4.48329e-180
Scaffold	18828-572_2_ORF1	374	Cluster of >sp|Q9LSU0|PSA3_ORYSJ_Proteasome_subunit_alpha_type-3_OS=Oryza_sativa_subsp._japonica_GN=PAG1_PE=2_SV=1|||3e-166 (18828-572_2_ORF1)	18828-572_2_ORF1 [2]	31 kDa	1	0.07			mapped	D8RLK8	519	D8RLK8_SELML	5.54051e-154	tr|D8RLK8|D8RLK8_SELML	18828-572_2_ORF1	sp|O23715|PSA3_ARATH	O23715	PSA3_ARATH	4.684e-162
Scaffold	tr|D8RLH8|D8RLH8_SELML	693	Cluster of Phosphoglycerate kinase OS=Selaginella moellendorffii GN=SELMODRAFT_267533 PE=3 SV=1 (tr|D8RLH8|D8RLH8_SELML)	tr|D8RLH8|D8RLH8_SELML [17]	49 kDa	1	0.06			notMapped		520				tr|D8RLH8|D8RLH8_SELML	sp|Q9C5U8|HIS8_ARATH	Q9C5U8	HIS8_ARATH	0
Scaffold	154679-189_1_ORF2	457	Cluster of >sp|P26320|PSBO_SOLTU_Oxygen-evolving_enhancer_protein_1,_chloroplastic_OS=Solanum_tuberosum_GN=PSBO_PE=2_SV=1|||7e-173 (154679-189_1_ORF2)	154679-189_1_ORF2 [7]	35 kDa	1	0.05			mapped	D8TBN9	521	D8TBN9_SELML	1.45887e-145	tr|D8TBN9|D8TBN9_SELML	154679-189_1_ORF2	sp|Q9S841|PSBO2_ARATH	Q9S841	PSBO2_ARATH	2.2627e-159
Scaffold	11164-718_2_ORF2	343	>sp|Q9SLQ8|PSBP_CUCSA_Oxygen-evolving_enhancer_protein_2,_chloroplastic_OS=Cucumis_sativus_GN=PSBP_PE=2_SV=1|||6e-108	11164-718_2_ORF2	30 kDa	1	0.05			mapped	D8TBL6	522	D8TBL6_SELML	2.61895e-101	tr|D8TBL6|D8TBL6_SELML	11164-718_2_ORF2	sp|Q42029|PSBP1_ARATH	Q42029	PSBP1_ARATH	2.33397e-102
Scaffold	tr|Q7Y0W7|Q7Y0W7_LUPAL	782	Cluster of Isocitrate dehydrogenase [NADP] OS=Lupinus albus GN=LaICDH2;1 PE=2 SV=1 (tr|Q7Y0W7|Q7Y0W7_LUPAL)	tr|Q7Y0W7|Q7Y0W7_LUPAL [3]	55 kDa	1	0			mapped	D8RFG1	523	D8RFG1_SELML	0	tr|D8RFG1|D8RFG1_SELML	tr|Q7Y0W7|Q7Y0W7_LUPAL	sp|Q8LPJ5|ICDHP_ARATH	Q8LPJ5	ICDHP_ARATH	0
Scaffold	tr|Q6AV23|Q6AV23_ORYSJ	811	Cluster of Putative TCP-1/cpn60 chaperonin family protein OS=Oryza sativa subsp. japonica GN=OSJNBa0063J18.19 PE=2 SV=1 (tr|Q6AV23|Q6AV23_ORYSJ)	tr|Q6AV23|Q6AV23_ORYSJ [4]	57 kDa	1	0			mapped	D8SP86	524	D8SP86_SELML	0	tr|D8SP86|D8SP86_SELML	tr|Q6AV23|Q6AV23_ORYSJ	sp|Q940P8|TCPB_ARATH	Q940P8	TCPB_ARATH	0
Scaffold	tr|E3URM0|E3URM0_PTEVI	284	Cluster of Triosephosphate isomerase OS=Pteris vittata GN=cTPI PE=2 SV=1 (tr|E3URM0|E3URM0_PTEVI)	tr|E3URM0|E3URM0_PTEVI [12]	27 kDa	1	0			mapped	D8QR59	525	D8QR59_SELML	1.00759e-140	tr|D8QR59|D8QR59_SELML	tr|E3URM0|E3URM0_PTEVI	sp|P48491|TPIS_ARATH	P48491	TPIS_ARATH	1.22916e-147
Scaffold	tr|E1ZJ10|E1ZJ10_CHLVA	276	Putative uncharacterized protein OS=Chlorella variabilis GN=CHLNCDRAFT_56227 PE=4 SV=1	tr|E1ZJ10|E1ZJ10_CHLVA	27 kDa	1	0			mapped	D8SUF1	526	D8SUF1_SELML	6.01402e-124	tr|D8SUF1|D8SUF1_SELML	tr|E1ZJ10|E1ZJ10_CHLVA	sp|Q9SHR7|CB21_ARATH	Q9SHR7	CB21_ARATH	9.15003e-122
Scaffold	tr|D8UI05|D8UI05_VOLCA	707	Elongation factor Tu OS=Volvox carteri GN=efg8 PE=3 SV=1	tr|D8UI05|D8UI05_VOLCA (+1)	50 kDa	1	0			mapped	D8S6G0	527	D8S6G0_SELML	0	tr|D8S6G0|D8S6G0_SELML	tr|D8UI05|D8UI05_VOLCA	sp|Q9ZT91|EFTM_ARATH	Q9ZT91	EFTM_ARATH	0
Scaffold	tr|B6T0A2|B6T0A2_MAIZE	93	Calmodulin OS=Zea mays PE=2 SV=1	tr|B6T0A2|B6T0A2_MAIZE	17 kDa	1	0			mapped	D8QWY9	528	D8QWY9_SELML	3.93388e-98	tr|D8QWY9|D8QWY9_SELML	tr|B6T0A2|B6T0A2_MAIZE	sp|Q03509|CALM6_ARATH	Q03509	CALM6_ARATH	3.07315e-97
Scaffold	tr|A9SRU1|A9SRU1_PHYPA	705	Cluster of Predicted protein OS=Physcomitrella patens subsp. patens GN=PHYPADRAFT_233909 PE=3 SV=1 (tr|A9SRU1|A9SRU1_PHYPA)	tr|A9SRU1|A9SRU1_PHYPA [8]	50 kDa	1	0			mapped	D8R6E7	529	D8R6E7_SELML	0	tr|D8R6E7|D8R6E7_SELML	tr|A9SRU1|A9SRU1_PHYPA	sp|Q9SL67|PRS4B_ARATH	Q9SL67	PRS4B_ARATH	0
Scaffold	tr|A9SF86|A9SF86_PHYPA	1078	Cluster of Predicted protein OS=Physcomitrella patens subsp. patens GN=PHYPADRAFT_232291 PE=3 SV=1 (tr|A9SF86|A9SF86_PHYPA)	tr|A9SF86|A9SF86_PHYPA [4]	118 kDa	1	0			mapped	D8S8E0	530	D8S8E0_SELML	0	tr|D8S8E0|D8S8E0_SELML	tr|A9SF86|A9SF86_PHYPA	sp|Q9LJL3|PREP1_ARATH	Q9LJL3	PREP1_ARATH	0
Scaffold	tr|A2XV92|A2XV92_ORYSI	132	Putative uncharacterized protein OS=Oryza sativa subsp. indica GN=OsI_16531 PE=3 SV=1	tr|A2XV92|A2XV92_ORYSI (+7)	19 kDa	1	0			notMapped		531				tr|A2XV92|A2XV92_ORYSI	sp|P21238|CPNA1_ARATH	P21238	CPNA1_ARATH	0
Scaffold	tr|A2X6N1|A2X6N1_ORYSI	227	Cluster of 60S ribosomal protein L6 OS=Oryza sativa subsp. indica GN=OsI_07870 PE=3 SV=1 (tr|A2X6N1|A2X6N1_ORYSI)	tr|A2X6N1|A2X6N1_ORYSI [13]	24 kDa	1	0			notMapped		532				tr|A2X6N1|A2X6N1_ORYSI	sp|Q96300|14337_ARATH	Q96300	14337_ARATH	1.10929e-161
Scaffold	sp|P45726|PALY_CAMSI	968	Phenylalanine ammonia-lyase OS=Camellia sinensis GN=PAL PE=2 SV=1	sp|P45726|PALY_CAMSI (+1)	78 kDa	1	0			mapped	D8SER3	533	D8SER3_SELML	0	tr|D8SER3|D8SER3_SELML	sp|P45726|PALY_CAMSI	sp|P35510|PAL1_ARATH	P35510	PAL1_ARATH	0
Scaffold	REV_152483-192_1_ORF2	692	REV_152483-192_1_ORF2	REV_152483-192_1_ORF2 (+1)	49 kDa	1	0			notMapped		534				REV_152483-192_1_ORF2	tr|Q9SKZ0|Q9SKZ0_ARATH	Q9SKZ0	Q9SKZ0_ARATH	4.18317e-48
Scaffold	9903-755_2_ORF2	1000	>sp|P0C1I9|CYP11_RHIO9_Peptidyl-prolyl_cis-trans_isomerase_cyp11_OS=Rhizopus_delemar_(strain_RA_99-880_/_ATCC_MYA-4621_/_FGSC_9543_/_NRRL_43880)_GN=cyp11_PE=3_SV=1|||2e-79	9903-755_2_ORF2 (+1)	87 kDa	1	0			notMapped		535				9903-755_2_ORF2	sp|Q9LMF1|U85A3_ARATH	Q9LMF1	U85A3_ARATH	4.3638e-87
Scaffold	95461-256_2_ORF1	16	>sp|P29409|PGKH_SPIOL_Phosphoglycerate_kinase,_chloroplastic_(Fragment)_OS=Spinacia_oleracea_PE=2_SV=2|||3e-47	95461-256_2_ORF1	10 kDa	1	0			mapped	D8RLH8	536	D8RLH8_SELML	3.1455e-47	tr|D8RLH8|D8RLH8_SELML	95461-256_2_ORF1	sp|Q9LD57|PGKH1_ARATH	Q9LD57	PGKH1_ARATH	5.63013e-43
Scaffold	77207-287_4_ORF2	795	>sp|Q8RWN9|OPD22_ARATH_Dihydrolipoyllysine-residue_acetyltransferase_component_2_of_pyruvate_dehydrogenase_complex,_mitochondrial_OS=Arabidopsis_thaliana_GN=At3g13930_PE=1_SV=2|||0	77207-287_4_ORF2	56 kDa	1	0			mapped	D8RIN1	537	D8RIN1_SELML	2.90131e-180	tr|D8RIN1|D8RIN1_SELML	77207-287_4_ORF2	sp|Q5M729|ODP23_ARATH	Q5M729	ODP23_ARATH	0
Scaffold	72587-296_2_ORF2	445	>sp|Q8LB10|CLPR4_ARATH_ATP-dependent_Clp_protease_proteolytic_subunit-related_protein_4,_chloroplastic_OS=Arabidopsis_thaliana_GN=CLPR4_PE=1_SV=1|||4e-135	72587-296_2_ORF2	35 kDa	1	0			mapped	D8SHA1	538	D8SHA1_SELML	1.20543e-117	tr|D8SHA1|D8SHA1_SELML	72587-296_2_ORF2	sp|Q8LB10|CLPR4_ARATH	Q8LB10	CLPR4_ARATH	3.56656e-132
Scaffold	66321-310_3_ORF2	111	>sp|P49108|PSBR_BRACM_Photosystem_II_10_kDa_polypeptide,_chloroplastic_OS=Brassica_campestris_GN=PSBR_PE=2_SV=1|||8e-50	66321-310_3_ORF2 (+1)	18 kDa	1	0			mapped	D8SLM2	539	D8SLM2_SELML	1.73255e-54	tr|D8SLM2|D8SLM2_SELML	66321-310_3_ORF2	sp|P27202|PSBR_ARATH	P27202	PSBR_ARATH	7.74617e-44
Scaffold	60548-325_6_ORF2	699	>sp|O59826|KCAB_SCHPO_Putative_voltage-gated_potassium_channel_subunit_beta_OS=Schizosaccharomyces_pombe_(strain_972_/_ATCC_24843)_GN=SPCC965.06_PE=2_SV=1|||4e-11	60548-325_6_ORF2	49 kDa	1	0			mapped	D8SB71	540	D8SB71_SELML	2.34867e-121	tr|D8SB71|D8SB71_SELML	60548-325_6_ORF2	sp|Q9M338|AKRCB_ARATH	Q9M338	AKRCB_ARATH	8.62181e-05
Scaffold	6036-926_2_ORF1	394	>sp|Q9ASS6|CP20B_ARATH_Peptidyl-prolyl_cis-trans_isomerase_CYP20-2,_chloroplastic_OS=Arabidopsis_thaliana_GN=CYP20-2_PE=1_SV=1|||1e-96	6036-926_2_ORF1	32 kDa	1	0			mapped	D8SU63	541	D8SU63_SELML	2.23153e-96	tr|D8SU63|D8SU63_SELML	6036-926_2_ORF1	sp|Q9ASS6|PNSL5_ARATH	Q9ASS6	PNSL5_ARATH	2.45386e-93
Scaffold	59878-327_6_ORF2	127	>sp|P93092|ACP1_CASGL_Acyl_carrier_protein_1,_chloroplastic_OS=Casuarina_glauca_GN=ACP1_PE=2_SV=1|||4e-35	59878-327_6_ORF2	18 kDa	1	0			mapped	D8RT99	542	D8RT99_SELML	1.73509e-28	tr|D8RT99|D8RT99_SELML	59878-327_6_ORF2	sp|Q9SW21|ACP4_ARATH	Q9SW21	ACP4_ARATH	4.46539e-29
Scaffold	570-1975_6_ORF2	663	>sp|Q9SAR5|AKR2_ARATH_Ankyrin_repeat_domain-containing_protein_2_OS=Arabidopsis_thaliana_GN=AKR2_PE=1_SV=2|||5e-140	570-1975_6_ORF2 (+1)	47 kDa	1	0			notMapped		543				570-1975_6_ORF2	noOrthologue	noOrthologue	noOrthologue	notMapped
Scaffold	5-9806_2_ORF2	994	Cluster of >sp|B0C474|PSAA_ACAM1_Photosystem_I_P700_chlorophyll_a_apoprotein_A1_OS=Acaryochloris_marina_(strain_MBIC_11017)_GN=psaA_PE=3_SV=1|||0 (5-9806_2_ORF2)	5-9806_2_ORF2 [3]	86 kDa	1	0			mapped	C7B2K6	544	C7B2K6_SELML	0	tr|C7B2K6|C7B2K6_SELML	5-9806_2_ORF2	sp|P56766|PSAA_ARATH	P56766	PSAA_ARATH	0
Scaffold	47558-369_4_ORF2	738	Cluster of >sp|P46643|AAT1_ARATH_Aspartate_aminotransferase,_mitochondrial_OS=Arabidopsis_thaliana_GN=ASP1_PE=1_SV=1|||0 (47558-369_4_ORF2)	47558-369_4_ORF2 [9]	52 kDa	1	0			mapped	D8R1D2	545	D8R1D2_SELML	0	tr|D8R1D2|D8R1D2_SELML	47558-369_4_ORF2	sp|P46643|AAT1_ARATH	P46643	AAT1_ARATH	0
Scaffold	40578-399_1_ORF2	248	>sp|Q85FI4|RR3_ADICA_30S_ribosomal_protein_S3,_chloroplastic_OS=Adiantum_capillus-veneris_GN=rps3_PE=2_SV=2|||4e-136	40578-399_1_ORF2	25 kDa	1	0			mapped	D8TEA6	546	D8TEA6_SELML	2.8095e-62	tr|D8TEA6|D8TEA6_SELML	40578-399_1_ORF2	sp|P56798|RR3_ARATH	P56798	RR3_ARATH	6.73291e-82
Scaffold	403847-22_6_ORF1	344	>sp|P50639|UNG_HHV7J_Uracil-DNA_glycosylase_OS=Human_herpesvirus_7_(strain_JI)_GN=U81_PE=3_SV=1|||1e-06	403847-22_6_ORF1	30 kDa	1	0			notMapped		547				403847-22_6_ORF1	noOrthologue	noOrthologue	noOrthologue	notMapped
Scaffold	378771-31_2_ORF1	392	>sp|Q9LU85|PAP4_ARATH_Probable_plastid-lipid-associated_protein_4,_chloroplastic_OS=Arabidopsis_thaliana_GN=PAP4_PE=1_SV=1|||3e-07	378771-31_2_ORF1	32 kDa	1	0			notMapped		548				378771-31_2_ORF1	noOrthologue	noOrthologue	noOrthologue	notMapped
Scaffold	37807-413_3_ORF1	214	>sp|Q93VI3|RL171_ARATH_60S_ribosomal_protein_L17-1_OS=Arabidopsis_thaliana_GN=RPL17A_PE=1_SV=1|||3e-110	37807-413_3_ORF1	24 kDa	1	0			mapped	D8RL47	549	D8RL47_SELML	9.54599e-105	tr|D8RL47|D8RL47_SELML	37807-413_3_ORF1	sp|Q93VI3|RL171_ARATH	Q93VI3	RL171_ARATH	5.22207e-107
Scaffold	357556-40_1_ORF1	685	>sp|P52901|ODPA1_ARATH_Pyruvate_dehydrogenase_E1_component_subunit_alpha-1,_mitochondrial_OS=Arabidopsis_thaliana_GN=At1g59900_PE=1_SV=2|||3e-161	357556-40_1_ORF1 (+1)	48 kDa	1	0			mapped	D8RLY8	550	D8RLY8_SELML	0	tr|D8RLY8|D8RLY8_SELML	357556-40_1_ORF1	sp|P52901|ODPA1_ARATH	P52901	ODPA1_ARATH	1.70655e-158
Scaffold	35041-428_5_ORF2	1101	>sp|Q9M8D3|PUR4_ARATH_Probable_phosphoribosylformylglycinamidine_synthase,_chloroplastic/mitochondrial_OS=Arabidopsis_thaliana_GN=At1g74260_PE=1_SV=3|||0	35041-428_5_ORF2	156 kDa	1	0			mapped	D8SDW9	551	D8SDW9_SELML	0	tr|D8SDW9|D8SDW9_SELML	35041-428_5_ORF2	sp|Q9M8D3|PUR4_ARATH	Q9M8D3	PUR4_ARATH	0
Scaffold	34727-430_6_ORF2	86	>sp|P49637|R27A3_ARATH_60S_ribosomal_protein_L27a-3_OS=Arabidopsis_thaliana_GN=RPL27AC_PE=2_SV=2|||3e-81	34727-430_6_ORF2	16 kDa	1	0			mapped	D8QU84	552	D8QU84_SELML	1.94326e-69	tr|D8QU84|D8QU84_SELML	34727-430_6_ORF2	sp|P49637|R27A3_ARATH	P49637	R27A3_ARATH	8.73061e-78
Scaffold	3434-1154_1_ORF2	736	>sp|P21856|GDIA_BOVIN_Rab_GDP_dissociation_inhibitor_alpha_OS=Bos_taurus_GN=GDI1_PE=1_SV=1|||0	3434-1154_1_ORF2	52 kDa	1	0			mapped	D8T0M5	553	D8T0M5_SELML	0	tr|D8T0M5|D8T0M5_SELML	3434-1154_1_ORF2	sp|Q96254|GDI1_ARATH	Q96254	GDI1_ARATH	0
Scaffold	326323-55_2_ORF2	849	no_acceptable_match|||NA	326323-55_2_ORF2	60 kDa	1	0			mapped	D8T4V8	554	D8T4V8_SELML	5.28206e-109	tr|D8T4V8|D8T4V8_SELML	326323-55_2_ORF2	sp|Q9SCU1|PATL6_ARATH	Q9SCU1	PATL6_ARATH	7.91466e-96
Scaffold	31174-453_6_ORF2	300	>sp|Q852S5|NDK2_TOBAC_Nucleoside_diphosphate_kinase_2,_chloroplastic_OS=Nicotiana_tabacum_GN=NDPK2_PE=1_SV=1|||2e-92	31174-453_6_ORF2	28 kDa	1	0			mapped	D8S2E3	555	D8S2E3_SELML	5.53903e-87	tr|D8S2E3|D8S2E3_SELML	31174-453_6_ORF2	sp|O64903|NDK2_ARATH	O64903	NDK2_ARATH	1.47897e-86
Scaffold	307943-64_4_ORF1	38	>sp|P04907|GSTF3_MAIZE_Glutathione_S-transferase_3_OS=Zea_mays_GN=GST3_PE=1_SV=4|||7e-41	307943-64_4_ORF1	13 kDa	1	0			mapped	D8R0M0	556	D8R0M0_SELML	1.26938e-41	tr|D8R0M0|D8R0M0_SELML	307943-64_4_ORF1	sp|O80852|GSTF9_ARATH	O80852	GSTF9_ARATH	5.83983e-33
Scaffold	294468-71_2_ORF2	851	Cluster of >sp|Q42521|DCE1_ARATH_Glutamate_decarboxylase_1_OS=Arabidopsis_thaliana_GN=GAD1_PE=1_SV=2|||0 (294468-71_2_ORF2)	294468-71_2_ORF2 [2]	61 kDa	1	0			mapped	D8SBV2	557	D8SBV2_SELML	0	tr|D8SBV2|D8SBV2_SELML	294468-71_2_ORF2	sp|Q42521|DCE1_ARATH	Q42521	DCE1_ARATH	0
Scaffold	27769-479_3_ORF1	36	>sp|P23509|GLGS_SOLTU_Glucose-1-phosphate_adenylyltransferase_small_subunit,_chloroplastic/amyloplastic_OS=Solanum_tuberosum_PE=1_SV=2|||8e-68	27769-479_3_ORF1	13 kDa	1	0			mapped	D8SER8	558	D8SER8_SELML	8.9932e-55	tr|D8SER8|D8SER8_SELML	27769-479_3_ORF1	sp|P55228|GLGS_ARATH	P55228	GLGS_ARATH	4.42967e-63
Scaffold	275578-83_5_ORF2	439	>sp|O94248|MDN1_SCHPO_Midasin_OS=Schizosaccharomyces_pombe_(strain_972_/_ATCC_24843)_GN=mdn1_PE=1_SV=1|||3e-08	275578-83_5_ORF2	34 kDa	1	0			notMapped		559				275578-83_5_ORF2	noOrthologue	noOrthologue	noOrthologue	notMapped
Scaffold	262994-91_3_ORF2	173	>sp|Q9FH13|RRAA3_ARATH_Regulator_of_ribonuclease-like_protein_3_OS=Arabidopsis_thaliana_GN=At5g56260_PE=2_SV=1|||3e-75	262994-91_3_ORF2 (+1)	21 kDa	1	0			mapped	D8T6M3	560	D8T6M3_SELML	7.9692e-77	tr|D8T6M3|D8T6M3_SELML	262994-91_3_ORF2	sp|Q9FH13|RRAA3_ARATH	Q9FH13	RRAA3_ARATH	1.02696e-71
Scaffold	262265-91_1_ORF2	181	>sp|P16972|FER2_ARATH_Ferredoxin-2,_chloroplastic_OS=Arabidopsis_thaliana_GN=FD2_PE=1_SV=1|||3e-49	262265-91_1_ORF2	22 kDa	1	0			mapped	D8R574	561	D8R574_SELML	7.71943e-38	tr|D8R574|D8R574_SELML	262265-91_1_ORF2	sp|P16972|FER2_ARATH	P16972	FER2_ARATH	2.16581e-45
Scaffold	252707-98_4_ORF1	85	>sp|A3LPQ8|MED10_PICST_Mediator_of_RNA_polymerase_II_transcription_subunit_10_OS=Scheffersomyces_stipitis_(strain_ATCC_58785_/_CBS_6054_/_NBRC_10063_/_NRRL_Y-11545)_GN=NUT2_PE=3_SV=2|||2e-07	252707-98_4_ORF1	16 kDa	1	0			notMapped		562				252707-98_4_ORF1	noOrthologue	noOrthologue	noOrthologue	notMapped
Scaffold	246708-102_5_ORF2	569	>sp|Q7XJ02|APX7_ORYSJ_Probable_L-ascorbate_peroxidase_7,_chloroplastic_OS=Oryza_sativa_subsp._japonica_GN=APX7_PE=2_SV=1|||1e-170	246708-102_5_ORF2	42 kDa	1	0			mapped	D8SS55	563	D8SS55_SELML	7.42097e-165	tr|D8SS55|D8SS55_SELML	246708-102_5_ORF2	sp|Q42593|APXT_ARATH	Q42593	APXT_ARATH	2.79955e-166
Scaffold	23540-517_5_ORF2	681	>sp|Q9LP45|PSD11_ARATH_26S_proteasome_non-ATPase_regulatory_subunit_11_OS=Arabidopsis_thaliana_GN=RPN6A_PE=1_SV=1|||0	23540-517_5_ORF2	48 kDa	1	0			mapped	D8R1Q0	564	D8R1Q0_SELML	0	tr|D8R1Q0|D8R1Q0_SELML	23540-517_5_ORF2	sp|Q9LP45|PSD11_ARATH	Q9LP45	PSD11_ARATH	0
Scaffold	227095-115_1_ORF2	549	>sp|Q84W65|SUFE_ARATH_SufE-like_protein,_chloroplastic_OS=Arabidopsis_thaliana_GN=EMB1374_PE=1_SV=2|||3e-109	227095-115_1_ORF2 (+2)	41 kDa	1	0			mapped	D8R4C8	565	D8R4C8_SELML	6.15309e-92	tr|D8R4C8|D8R4C8_SELML	227095-115_1_ORF2	sp|Q84W65|SUFE1_ARATH	Q84W65	SUFE1_ARATH	3.22404e-106
Scaffold	225352-117_1_ORF2	674	>sp|A2Z7B3|GME1_ORYSI_GDP-mannose_3,5-epimerase_1_OS=Oryza_sativa_subsp._indica_GN=OsI_032456_PE=2_SV=1|||0	225352-117_1_ORF2 (+1)	48 kDa	1	0			mapped	D8SRX1	566	D8SRX1_SELML	0	tr|D8SRX1|D8SRX1_SELML	225352-117_1_ORF2	sp|Q93VR3|GME_ARATH	Q93VR3	GME_ARATH	0
Scaffold	224245-118_2_ORF1	603	>sp|P55607|Y4OV_RHISN_Uncharacterized_protein_y4oV_OS=Rhizobium_sp._(strain_NGR234)_GN=NGR_a02140_PE=4_SV=1|||1e-116	224245-118_2_ORF1 (+1)	44 kDa	1	0			notMapped		567				224245-118_2_ORF1	sp|Q8RWV0|TKTC1_ARATH	Q8RWV0	TKTC1_ARATH	0
Scaffold	218625-122_1_ORF2	239	>sp|O22773|TL16_ARATH_Thylakoid_lumenal_16.5_kDa_protein,_chloroplastic_OS=Arabidopsis_thaliana_GN=At4g02530_PE=1_SV=3|||2e-50	218625-122_1_ORF2	25 kDa	1	0			mapped	D8RKJ7	568	D8RKJ7_SELML	2.61475e-48	tr|D8RKJ7|D8RKJ7_SELML	218625-122_1_ORF2	sp|O22773|TL16_ARATH	O22773	TL16_ARATH	8.5455e-47
Scaffold	210312-129_2_ORF1	974	>sp|P34422|DPF6_CAEEL_Dipeptidyl_peptidase_family_member_6_OS=Caenorhabditis_elegans_GN=dpf-6_PE=2_SV=2|||4e-29	210312-129_2_ORF1 (+1)	80 kDa	1	0			mapped	D8TAZ4	569	D8TAZ4_SELML	0	tr|D8TAZ4|D8TAZ4_SELML	210312-129_2_ORF1	tr|F4K2Y3|F4K2Y3_ARATH	F4K2Y3	F4K2Y3_ARATH	0
Scaffold	20760-547_4_ORF1	144	>sp|Q42961|PGKH_TOBAC_Phosphoglycerate_kinase,_chloroplastic_OS=Nicotiana_tabacum_PE=2_SV=1|||8e-116	20760-547_4_ORF1	20 kDa	1	0			mapped	D8RMZ2	570	D8RMZ2_SELML	2.29075e-111	tr|D8RMZ2|D8RMZ2_SELML	20760-547_4_ORF1	sp|Q9LD57|PGKH1_ARATH	Q9LD57	PGKH1_ARATH	9.28226e-112
Scaffold	19573-562_5_ORF2	1074	>sp|Q9SYI0|SECA1_ARATH_Protein_translocase_subunit_SECA1,_chloroplastic_OS=Arabidopsis_thaliana_GN=SECA1_PE=1_SV=2|||0	19573-562_5_ORF2	116 kDa	1	0			mapped	D8SK06	571	D8SK06_SELML	0	tr|D8SK06|D8SK06_SELML	19573-562_5_ORF2	tr|A0A1P8B485|A0A1P8B485_ARATH	A0A1P8B485	A0A1P8B485_ARATH	0
Scaffold	190037-147_5_ORF1	936	>sp|Q23892|GLUA_DICDI_Lysosomal_beta_glucosidase_OS=Dictyostelium_discoideum_GN=gluA_PE=1_SV=2|||1e-77	190037-147_5_ORF1 (+2)	70 kDa	1	0			mapped	D8QPF8	572	D8QPF8_SELML	0	tr|D8QPF8|D8QPF8_SELML	190037-147_5_ORF1	tr|A0A1P8BG25|A0A1P8BG25_ARATH	A0A1P8BG25	A0A1P8BG25_ARATH	0
Scaffold	180631-155_1_ORF1	837	>sp|P52894|ALA2_HORVU_Alanine_aminotransferase_2_OS=Hordeum_vulgare_PE=1_SV=1|||0	180631-155_1_ORF1 (+1)	59 kDa	1	0			notMapped		573				180631-155_1_ORF1	sp|O81235|SODM1_ARATH	O81235	SODM1_ARATH	1.50805e-104
Scaffold	177876-158_1_ORF2	390	>sp|Q8LE52|DHAR3_ARATH_Glutathione_S-transferase_DHAR3,_chloroplastic_OS=Arabidopsis_thaliana_GN=DHAR3_PE=1_SV=1|||2e-106	177876-158_1_ORF2 (+1)	32 kDa	1	0			mapped	D8S946	574	D8S946_SELML	2.15467e-109	tr|D8S946|D8S946_SELML	177876-158_1_ORF2	sp|Q8LE52|DHAR3_ARATH	Q8LE52	DHAR3_ARATH	3.08222e-103
Scaffold	176372-160_3_ORF1	326	>sp|Q9C5D0|CBSX2_ARATH_CBS_domain-containing_protein_CBSX2,_chloroplastic_OS=Arabidopsis_thaliana_GN=CBSX2_PE=1_SV=1|||5e-84	176372-160_3_ORF1 (+1)	29 kDa	1	0			mapped	D8QZL4	575	D8QZL4_SELML	8.85654e-84	tr|D8QZL4|D8QZL4_SELML	176372-160_3_ORF1	sp|Q9C5D0|CBSX2_ARATH	Q9C5D0	CBSX2_ARATH	1.02281e-80
Scaffold	16646-605_4_ORF2	134	>sp|Q8SAY0|RK18_ORYSJ_50S_ribosomal_protein_L18,_chloroplastic_OS=Oryza_sativa_subsp._japonica_GN=RPL18_PE=2_SV=1|||1e-62	16646-605_4_ORF2	19 kDa	1	0			mapped	D8SGB7	576	D8SGB7_SELML	2.62026e-63	tr|D8SGB7|D8SGB7_SELML	16646-605_4_ORF2	sp|Q9SX68|RK18_ARATH	Q9SX68	RK18_ARATH	7.35459e-57
Scaffold	164104-175_1_ORF1	586	no_acceptable_match|||NA	164104-175_1_ORF1	43 kDa	1	0			mapped	D8TDR8	577	D8TDR8_SELML	0	tr|D8TDR8|D8TDR8_SELML	164104-175_1_ORF1	sp|Q9FKW6|FNRL1_ARATH	Q9FKW6	FNRL1_ARATH	0
Scaffold	158467-182_5_ORF2	506	>sp|Q9LZX4|FLA10_ARATH_Fasciclin-like_arabinogalactan_protein_10_OS=Arabidopsis_thaliana_GN=FLA10_PE=1_SV=1|||4e-58	158467-182_5_ORF2 (+1)	38 kDa	1	0			mapped	D8RZC7	578	D8RZC7_SELML	8.51541e-59	tr|D8RZC7|D8RZC7_SELML	158467-182_5_ORF2	sp|Q9LZX4|FLA10_ARATH	Q9LZX4	FLA10_ARATH	1.3589e-54
Scaffold	156759-185_4_ORF1	415	>sp|O82803|SRPP_HEVBR_Small_rubber_particle_protein_OS=Hevea_brasiliensis_GN=SRPP_PE=1_SV=1|||6e-46	156759-185_4_ORF1 (+1)	33 kDa	1	0			mapped	D8SZP3	579	D8SZP3_SELML	9.10056e-70	tr|D8SZP3|D8SZP3_SELML	156759-185_4_ORF1	sp|Q9MA63|Y3550_ARATH	Q9MA63	Y3550_ARATH	1.70057e-38
Scaffold	155382-187_1_ORF2	915	Cluster of >sp|Q08DP0|PGM1_BOVIN_Phosphoglucomutase-1_OS=Bos_taurus_GN=PGM1_PE=2_SV=1|||0 (155382-187_1_ORF2)	155382-187_1_ORF2 [6]	68 kDa	1	0			mapped	D8T2E8	580	D8T2E8_SELML	0	tr|D8T2E8|D8T2E8_SELML	155382-187_1_ORF2	tr|F4I6W4|F4I6W4_ARATH	F4I6W4	F4I6W4_ARATH	0
Scaffold	153413-190_1_ORF2	606	>sp|O82035|CADH2_PICAB_Probable_cinnamyl_alcohol_dehydrogenase_2_OS=Picea_abies_GN=CAD2_PE=3_SV=1|||6e-157	153413-190_1_ORF2 (+1)	44 kDa	1	0			mapped	D8RC19	581	D8RC19_SELML	5.67679e-161	tr|D8RC19|D8RC19_SELML	153413-190_1_ORF2	sp|P42734|CADH9_ARATH	P42734	CADH9_ARATH	1.88003e-140
Scaffold	152024-193_3_ORF2	477	>sp|Q9ZU38|RPIA_ARATH_Probable_ribose-5-phosphate_isomerase_OS=Arabidopsis_thaliana_GN=At2g01290_PE=2_SV=1|||2e-110	152024-193_3_ORF2	36 kDa	1	0			mapped	D8SJ52	582	D8SJ52_SELML	1.38761e-161	tr|D8SJ52|D8SJ52_SELML	152024-193_3_ORF2	sp|Q9S726|RPI3_ARATH	Q9S726	RPI3_ARATH	5.33033e-120
Scaffold	149253-199_6_ORF2	254	>sp|O22870|FK163_ARATH_Peptidyl-prolyl_cis-trans_isomerase_FKBP16-3,_chloroplastic_OS=Arabidopsis_thaliana_GN=FKBP16-3_PE=1_SV=2|||2e-88	149253-199_6_ORF2	26 kDa	1	0			mapped	D8RR83	583	D8RR83_SELML	9.93189e-79	tr|D8RR83|D8RR83_SELML	149253-199_6_ORF2	sp|O22870|FK163_ARATH	O22870	FK163_ARATH	4.70215e-85
Scaffold	13620-656_6_ORF2	430	>sp|Q9SYM5|RHM1_ARATH_Probable_rhamnose_biosynthetic_enzyme_1_OS=Arabidopsis_thaliana_GN=RHM1_PE=1_SV=1|||0	13620-656_6_ORF2	34 kDa	1	0			mapped	D8R443	584	D8R443_SELML	1.32392e-175	tr|D8R443|D8R443_SELML	13620-656_6_ORF2	sp|Q9LQ04|RMLCD_ARATH	Q9LQ04	RMLCD_ARATH	0
Scaffold	133847-212_2_ORF2	419	>sp|Q9SID3|GLO2N_ARATH_Hydroxyacylglutathione_hydrolase_2,_mitochondrial_OS=Arabidopsis_thaliana_GN=At2g31350_PE=1_SV=1|||7e-134	133847-212_2_ORF2 (+2)	33 kDa	1	0			mapped	D8SIZ3	585	D8SIZ3_SELML	1.8571e-120	tr|D8SIZ3|D8SIZ3_SELML	133847-212_2_ORF2	sp|Q9SID3|GLO2N_ARATH	Q9SID3	GLO2N_ARATH	6.5083e-131
Scaffold	11826-701_4_ORF1	373	>sp|Q93062|RBPMS_HUMAN_RNA-binding_protein_with_multiple_splicing_OS=Homo_sapiens_GN=RBPMS_PE=1_SV=1|||6e-13	11826-701_4_ORF1 (+1)	31 kDa	1	0			mapped	D8QXZ8	586	D8QXZ8_SELML	3.45027e-40	tr|D8QXZ8|D8QXZ8_SELML	11826-701_4_ORF1	sp|A1A6K6|NSRA_ARATH	A1A6K6	NSRA_ARATH	4.35538e-38
Scaffold	116951-229_1_ORF2	625	>sp|Q9S7T8|SPZX_ARATH_Serpin-ZX_OS=Arabidopsis_thaliana_GN=At1g47710_PE=1_SV=1|||1e-122	116951-229_1_ORF2 (+1)	45 kDa	1	0			notMapped		587				116951-229_1_ORF2	sp|F4IFC5|SYTM2_ARATH	F4IFC5	SYTM2_ARATH	0
Scaffold	114245-232_3_ORF1	743	>sp|Q8H107|ODO2B_ARATH_Dihydrolipoyllysine-residue_succinyltransferase_component_of_2-oxoglutarate_dehydrogenase_complex_2,_mitochondrial_OS=Arabidopsis_thaliana_GN=At4g26910_PE=1_SV=2|||0	114245-232_3_ORF1	52 kDa	1	0			mapped	D8QQW2	588	D8QQW2_SELML	4.01199e-167	tr|D8QQW2|D8QQW2_SELML	114245-232_3_ORF1	sp|Q8H107|ODO2B_ARATH	Q8H107	ODO2B_ARATH	1.01081e-180
Scaffold	113756-233_2_ORF1	942	no_acceptable_match|||NA	113756-233_2_ORF1	71 kDa	1	0			mapped	D8S353	589	D8S353_SELML	0	tr|D8S353|D8S353_SELML	113756-233_2_ORF1	sp|Q9SIU0|MAO1_ARATH	Q9SIU0	MAO1_ARATH	0
Scaffold	10465-738_4_ORF2	192	>sp|Q99728|BARD1_HUMAN_BRCA1-associated_RING_domain_protein_1_OS=Homo_sapiens_GN=BARD1_PE=1_SV=2|||6e-25	10465-738_4_ORF2	22 kDa	1	0			mapped	D8T5P0	590	D8T5P0_SELML	5.8848e-15	tr|D8T5P0|D8T5P0_SELML	10465-738_4_ORF2	tr|Q8LDN2|Q8LDN2_ARATH	Q8LDN2	Q8LDN2_ARATH	1.58821e-54
Scaffold	102811-246_6_ORF2	872	Cluster of >sp|O04499|PMG1_ARATH_2,3-bisphosphoglycerate-independent_phosphoglycerate_mutase_1_OS=Arabidopsis_thaliana_GN=PGM1_PE=2_SV=3|||0 (102811-246_6_ORF2)	102811-246_6_ORF2 [3]	63 kDa	1	0			mapped	D8SMA9	591	D8SMA9_SELML	0	tr|D8SMA9|D8SMA9_SELML	102811-246_6_ORF2	sp|O04499|PMG1_ARATH	O04499	PMG1_ARATH	0
Scaffold	102649-246_6_ORF1	599	>sp|O64530|STR1_ARATH_Thiosulfate/3-mercaptopyruvate_sulfurtransferase_1,_mitochondrial_OS=Arabidopsis_thaliana_GN=STR1_PE=1_SV=1|||3e-144	102649-246_6_ORF1 (+1)	43 kDa	1	0			mapped	D8RXZ1	592	D8RXZ1_SELML	2.22121e-128	tr|D8RXZ1|D8RXZ1_SELML	102649-246_6_ORF1	sp|O64530|STR1_ARATH	O64530	STR1_ARATH	2.00525e-141
Scaffold	2524-1285_6_ORF2	180	>sp|Q39613|CYPH_CATRO_Peptidyl-prolyl_cis-trans_isomerase_OS=Catharanthus_roseus_GN=PCKR1_PE=2_SV=1|||1e-107	2524-1285_6_ORF2	22 kDa	1	-0.03			mapped	D8QXE2	593	D8QXE2_SELML	1.59767e-103	tr|D8QXE2|D8QXE2_SELML	2524-1285_6_ORF2	sp|Q9SKQ0|CP19B_ARATH	Q9SKQ0	CP19B_ARATH	8.04018e-102
Scaffold	31704-450_4_ORF1	98	>sp|Q08069|RS8_MAIZE_40S_ribosomal_protein_S8_OS=Zea_mays_GN=RPS8_PE=2_SV=2|||1e-87	31704-450_4_ORF1	17 kDa	1	-0.08			mapped	D8QYB4	594	D8QYB4_SELML	1.24988e-75	tr|D8QYB4|D8QYB4_SELML	31704-450_4_ORF1	sp|Q9FIF3|RS82_ARATH	Q9FIF3	RS82_ARATH	1.92698e-73
Scaffold	31338-452_5_ORF1	1084	>sp|A6UVT6|LADH_META3_Lactaldehyde_dehydrogenase_OS=Methanococcus_aeolicus_(strain_Nankai-3_/_ATCC_BAA-1280)_GN=Maeo_1030_PE=3_SV=1|||2e-97	31338-452_5_ORF1 (+1)	125 kDa	1	-0.12			mapped	D8SGK9	595	D8SGK9_SELML	0	tr|D8SGK9|D8SGK9_SELML	31338-452_5_ORF1	sp|Q9SAK4|SSDH_ARATH	Q9SAK4	SSDH_ARATH	3.84771e-73
Scaffold	tr|Q5PYJ7|Q5PYJ7_9MONI	607	Cluster of Ribulose bisphosphate carboxylase large chain (Fragment) OS=Elaphoglossum orbignyanum GN=rbcL PE=3 SV=1 (tr|Q5PYJ7|Q5PYJ7_9MONI)	tr|Q5PYJ7|Q5PYJ7_9MONI [477]	44 kDa	1	-0.13			notMapped		596				tr|Q5PYJ7|Q5PYJ7_9MONI	sp|Q9MAQ0|SSG1_ARATH	Q9MAQ0	SSG1_ARATH	0
Scaffold	66444-310_2_ORF2	854	>sp|Q7XTT4|NUCL2_ORYSJ_Nucleolin_2_OS=Oryza_sativa_subsp._japonica_GN=Os04g0620700_PE=2_SV=2|||1e-58	66444-310_2_ORF2	62 kDa	1	-0.13			mapped	D8SJY2	597	D8SJY2_SELML	5.07955e-53	tr|D8SJY2|D8SJY2_SELML	66444-310_2_ORF2	sp|Q1PEP5|NUCL2_ARATH	Q1PEP5	NUCL2_ARATH	6.82998e-49
Scaffold	54280-344_1_ORF1	1064	Cluster of >sp|Q9MAH0|CAPP1_ARATH_Phosphoenolpyruvate_carboxylase_1_OS=Arabidopsis_thaliana_GN=PPC1_PE=1_SV=1|||0 (54280-344_1_ORF1)	54280-344_1_ORF1 [11]	112 kDa	1	-0.13			mapped	D8TAC4	598	D8TAC4_SELML	0	tr|D8TAC4|D8TAC4_SELML	54280-344_1_ORF1	sp|Q84VW9|CAPP3_ARATH	Q84VW9	CAPP3_ARATH	0
Scaffold	235419-110_1_ORF1	745	Cluster of >sp|Q6AXX3|Z385D_RAT_Zinc_finger_protein_385D_OS=Rattus_norvegicus_GN=Znf385d_PE=2_SV=1|||1e-07 (235419-110_1_ORF1)	235419-110_1_ORF1 [3]	52 kDa	1	-0.13			notMapped		599				235419-110_1_ORF1	noOrthologue	noOrthologue	noOrthologue	notMapped
Scaffold	92557-260_5_ORF2	818	Cluster of >sp|P22200|KPYC_SOLTU_Pyruvate_kinase,_cytosolic_isozyme_OS=Solanum_tuberosum_PE=2_SV=1|||1e-141 (92557-260_5_ORF2)	92557-260_5_ORF2 [8]	58 kDa	1	-0.14			mapped	D8QSY2	600	D8QSY2_SELML	0	tr|D8QSY2|D8QSY2_SELML	92557-260_5_ORF2	tr|Q94KE3|Q94KE3_ARATH	Q94KE3	Q94KE3_ARATH	0
Scaffold	21394-539_3_ORF2	213	>sp|P42791|RL182_ARATH_60S_ribosomal_protein_L18-2_OS=Arabidopsis_thaliana_GN=RPL18B_PE=1_SV=2|||4e-112	21394-539_3_ORF2	23 kDa	1	-0.14			mapped	D8SRL1	601	D8SRL1_SELML	2.82083e-104	tr|D8SRL1|D8SRL1_SELML	21394-539_3_ORF2	sp|P42791|RL182_ARATH	P42791	RL182_ARATH	7.98592e-109
Scaffold	192949-144_3_ORF2	1029	>sp|Q0IIM3|HS105_BOVIN_Heat_shock_protein_105_kDa_OS=Bos_taurus_GN=HSPH1_PE=2_SV=1|||0	192949-144_3_ORF2	95 kDa	1	-0.14			mapped	D8ST01	602	D8ST01_SELML	0	tr|D8ST01|D8ST01_SELML	192949-144_3_ORF2	sp|F4HQD4|HSP7P_ARATH	F4HQD4	HSP7P_ARATH	0
Scaffold	14173-642_3_ORF2	20	>sp|P34893|CH10_ARATH_10_kDa_chaperonin_OS=Arabidopsis_thaliana_GN=CPN10_PE=2_SV=1|||2e-45	14173-642_3_ORF2	11 kDa	1	-0.14			mapped	D8RD27	603	D8RD27_SELML	4.08209e-30	tr|D8RD27|D8RD27_SELML	14173-642_3_ORF2	sp|P34893|CH10_ARATH	P34893	CH10_ARATH	1.40293e-41
Scaffold	tr|Q9ZPJ2|Q9ZPJ2_SOYBN	153	Cluster of ADP-ribosylation factor (Fragment) OS=Glycine max PE=2 SV=1 (tr|Q9ZPJ2|Q9ZPJ2_SOYBN)	tr|Q9ZPJ2|Q9ZPJ2_SOYBN [4]	20 kDa	1	-0.15			mapped	D8QSR7	604	D8QSR7_SELML	1.01136e-130	tr|D8QSR7|D8QSR7_SELML	tr|Q9ZPJ2|Q9ZPJ2_SOYBN	tr|Q6ID97|Q6ID97_ARATH	Q6ID97	Q6ID97_ARATH	1.95319e-132
Scaffold	tr|E1ZRS4|E1ZRS4_CHLVA	453	Malate dehydrogenase OS=Chlorella variabilis GN=CHLNCDRAFT_59812 PE=3 SV=1	tr|E1ZRS4|E1ZRS4_CHLVA	35 kDa	1	-0.15			mapped	D8T513	605	D8T513_SELML	4.1274e-159	tr|D8T513|D8T513_SELML	tr|E1ZRS4|E1ZRS4_CHLVA	sp|Q9ZP06|MDHM1_ARATH	Q9ZP06	MDHM1_ARATH	4.26467e-170
Scaffold	46-3792_1_ORF2	822	Cluster of >sp|B0C929|CHLB_ACAM1_Light-independent_protochlorophyllide_reductase_subunit_B_OS=Acaryochloris_marina_(strain_MBIC_11017)_GN=chlB_PE=3_SV=1|||0 (46-3792_1_ORF2)	46-3792_1_ORF2 [4]	58 kDa	1	-0.15			mapped	C7B2F3	606	C7B2F3_SELML	0	tr|C7B2F3|C7B2F3_SELML	46-3792_1_ORF2	sp|Q9M316|PP292_ARATH	Q9M316	PP292_ARATH	0.972904
Scaffold	387953-27_4_ORF1	779	Cluster of >sp|Q9SGY2|ACLA1_ARATH_ATP-citrate_synthase_alpha_chain_protein_1_OS=Arabidopsis_thaliana_GN=ACLA-1_PE=1_SV=1|||0 (387953-27_4_ORF1)	387953-27_4_ORF1 [3]	55 kDa	1	-0.15			mapped	D8QRI7	607	D8QRI7_SELML	0	tr|D8QRI7|D8QRI7_SELML	387953-27_4_ORF1	sp|Q9SGY2|ACLA1_ARATH	Q9SGY2	ACLA1_ARATH	0
Scaffold	313997-61_1_ORF1	349	Cluster of >sp|Q9SLQ8|PSBP_CUCSA_Oxygen-evolving_enhancer_protein_2,_chloroplastic_OS=Cucumis_sativus_GN=PSBP_PE=2_SV=1|||3e-115 (313997-61_1_ORF1)	313997-61_1_ORF1 [3]	30 kDa	1	-0.15			mapped	D8TBL6	608	D8TBL6_SELML	1.98186e-110	tr|D8TBL6|D8TBL6_SELML	313997-61_1_ORF1	sp|Q42029|PSBP1_ARATH	Q42029	PSBP1_ARATH	9.9072e-110
Scaffold	10578-735_3_ORF2	755	>sp|Q42586|UMPS_ARATH_Uridine_5'-monophosphate_synthase_OS=Arabidopsis_thaliana_GN=PYRE-F_PE=2_SV=2|||0	10578-735_3_ORF2	52 kDa	1	-0.15			mapped	D8T6P1	609	D8T6P1_SELML	0	tr|D8T6P1|D8T6P1_SELML	10578-735_3_ORF2	sp|Q42586|UMPS_ARATH	Q42586	UMPS_ARATH	0
Scaffold	14044-645_6_ORF2	792	>sp|P30184|AMPL1_ARATH_Leucine_aminopeptidase_1_OS=Arabidopsis_thaliana_GN=PM25_PE=1_SV=1|||0	14044-645_6_ORF2	56 kDa	1	-0.16			mapped	D8R1F7	610	D8R1F7_SELML	0	tr|D8R1F7|D8R1F7_SELML	14044-645_6_ORF2	sp|P30184|AMPL1_ARATH	P30184	AMPL1_ARATH	0
Scaffold	156827-185_4_ORF1	833	Cluster of >sp|Q9FWA3|6GPD3_ARATH_6-phosphogluconate_dehydrogenase,_decarboxylating_3_OS=Arabidopsis_thaliana_GN=At3g02360_PE=2_SV=1|||0 (156827-185_4_ORF1)	156827-185_4_ORF1 [6]	59 kDa	1	-0.17			mapped	D8RNJ9	611	D8RNJ9_SELML	0	tr|D8RNJ9|D8RNJ9_SELML	156827-185_4_ORF1	sp|Q9SH69|6PGD1_ARATH	Q9SH69	6PGD1_ARATH	0
Scaffold	tr|B8LPY2|B8LPY2_PICSI	989	Cluster of Putative uncharacterized protein OS=Picea sitchensis PE=2 SV=1 (tr|B8LPY2|B8LPY2_PICSI)	tr|B8LPY2|B8LPY2_PICSI [5]	84 kDa	1	-0.19			mapped	D8RFL9	612	D8RFL9_SELML	0	tr|D8RFL9|D8RFL9_SELML	tr|B8LPY2|B8LPY2_PICSI	sp|O50008|METE1_ARATH	O50008	METE1_ARATH	0
Scaffold	431187-4_5_ORF1	11	Cluster of >sp|P62785|H41_WHEAT_Histone_H4_variant_TH011_OS=Triticum_aestivum_PE=3_SV=2|||2e-56 (431187-4_5_ORF1)	431187-4_5_ORF1 [2]	9 kDa	1	-0.19			mapped	D8R2U1	613	D8R2U1_SELML	1.06372e-52	tr|D8R2U1|D8R2U1_SELML	431187-4_5_ORF1	sp|P59259|H4_ARATH	P59259	H4_ARATH	1.35927e-52
Scaffold	396305-24_6_ORF2	357	Cluster of >sp|Q6ER94|BAS1_ORYSJ_2-Cys_peroxiredoxin_BAS1,_chloroplastic_OS=Oryza_sativa_subsp._japonica_GN=BAS1_PE=1_SV=1|||5e-137 (396305-24_6_ORF2)	396305-24_6_ORF2 [5]	31 kDa	1	-0.19			mapped	D8SC92	614	D8SC92_SELML	6.03803e-135	tr|D8SC92|D8SC92_SELML	396305-24_6_ORF2	sp|Q9C5R8|BAS1B_ARATH	Q9C5R8	BAS1B_ARATH	1.94227e-129
Scaffold	tr|A9SGN5|A9SGN5_PHYPA	659	Cluster of Predicted protein OS=Physcomitrella patens subsp. patens GN=PHYPADRAFT_233331 PE=3 SV=1 (tr|A9SGN5|A9SGN5_PHYPA)	tr|A9SGN5|A9SGN5_PHYPA [6]	47 kDa	1	-0.21			mapped	D8R691	615	D8R691_SELML	0	tr|D8R691|D8R691_SELML	tr|A9SGN5|A9SGN5_PHYPA	sp|P41376|IF4A1_ARATH	P41376	IF4A1_ARATH	0
Scaffold	176389-160_3_ORF2	123	Cluster of >sp|P40590|RL34_PEA_60S_ribosomal_protein_L34_OS=Pisum_sativum_GN=RPL34_PE=2_SV=1|||2e-73 (176389-160_3_ORF2)	176389-160_3_ORF2 [3]	18 kDa	1	-0.21			mapped	D8SC41	616	D8SC41_SELML	9.00211e-40	tr|D8SC41|D8SC41_SELML	176389-160_3_ORF2	sp|Q42351|RL341_ARATH	Q42351	RL341_ARATH	1.23188e-65
Scaffold	5546-959_2_ORF1	413	Cluster of >sp|Q9ZNT7|PHB2_ARATH_Prohibitin-2,_mitochondrial_OS=Arabidopsis_thaliana_GN=PHB2_PE=1_SV=1|||1e-161 (5546-959_2_ORF1)	5546-959_2_ORF1 [5]	33 kDa	1	-0.22			mapped	D8S700	617	D8S700_SELML	1.59757e-149	tr|D8S700|D8S700_SELML	5546-959_2_ORF1	sp|Q9ZNT7|PHB2_ARATH	Q9ZNT7	PHB2_ARATH	9.69493e-159
Scaffold	369963-35_1_ORF2	911	>sp|Q6AXS3|DEK_RAT_Protein_DEK_OS=Rattus_norvegicus_GN=Dek_PE=2_SV=1|||7e-15	369963-35_1_ORF2 (+2)	67 kDa	1	-0.22			mapped	D8QXW2	618	D8QXW2_SELML	1.30848e-36	tr|D8QXW2|D8QXW2_SELML	369963-35_1_ORF2	tr|Q9FFQ8|Q9FFQ8_ARATH	Q9FFQ8	Q9FFQ8_ARATH	1.01865e-40
Scaffold	33137-439_6_ORF2	780	>sp|O48917|SQD1_ARATH_UDP-sulfoquinovose_synthase,_chloroplastic_OS=Arabidopsis_thaliana_GN=SQD1_PE=1_SV=1|||0	33137-439_6_ORF2	55 kDa	1	-0.22			mapped	D8SF21	619	D8SF21_SELML	0	tr|D8SF21|D8SF21_SELML	33137-439_6_ORF2	sp|O48917|SQD1_ARATH	O48917	SQD1_ARATH	0
Scaffold	234374-110_1_ORF2	951	Cluster of >sp|Q5UNY4|YL728_MIMIV_Uncharacterized_protein_L728_OS=Acanthamoeba_polyphaga_mimivirus_GN=MIMI_L728_PE=4_SV=1|||3e-58 (234374-110_1_ORF2)	234374-110_1_ORF2 [3]	74 kDa	1	-0.22			mapped	D8SML4	620	D8SML4_SELML	0	tr|D8SML4|D8SML4_SELML	234374-110_1_ORF2	tr|Q94AE4|Q94AE4_ARATH	Q94AE4	Q94AE4_ARATH	0
Scaffold	20923-545_2_ORF2	804	Cluster of >sp|Q8LF48|THIK1_ARATH_3-ketoacyl-CoA_thiolase_1,_peroxisomal_OS=Arabidopsis_thaliana_GN=KAT1_PE=1_SV=2|||0 (20923-545_2_ORF2)	20923-545_2_ORF2 [6]	57 kDa	1	-0.23			mapped	D8QWD7	621	D8QWD7_SELML	0	tr|D8QWD7|D8QWD7_SELML	20923-545_2_ORF2	sp|Q56WD9|THIK2_ARATH	Q56WD9	THIK2_ARATH	0
Scaffold	tr|A5BX24|A5BX24_VITVI	87	Cluster of Putative uncharacterized protein OS=Vitis vinifera GN=VIT_03s0063g00130 PE=3 SV=1 (tr|A5BX24|A5BX24_VITVI)	tr|A5BX24|A5BX24_VITVI [4]	16 kDa	1	-0.26			mapped	D8TF39	622	D8TF39_SELML	9.94504e-94	tr|D8TF39|D8TF39_SELML	tr|A5BX24|A5BX24_VITVI	sp|Q9SK22|RS161_ARATH	Q9SK22	RS161_ARATH	4.56071e-91
Scaffold	9439-771_3_ORF2	103	>sp|P49206|RS261_ARATH_40S_ribosomal_protein_S26-1_OS=Arabidopsis_thaliana_GN=RPS26A_PE=2_SV=2|||6e-68	9439-771_3_ORF2	17 kDa	1	-0.26			notMapped		623				9439-771_3_ORF2	sp|Q9SUT5|SGT1B_ARATH	Q9SUT5	SGT1B_ARATH	8.73566e-118
Scaffold	93086-259_4_ORF1	448	>sp|Q9LT08|PSDE_ARATH_26S_proteasome_non-ATPase_regulatory_subunit_14_OS=Arabidopsis_thaliana_GN=RPN11_PE=2_SV=1|||0	93086-259_4_ORF1	35 kDa	1	-0.26			mapped	D8R1P1	624	D8R1P1_SELML	0	tr|D8R1P1|D8R1P1_SELML	93086-259_4_ORF1	sp|Q9LT08|PSDE_ARATH	Q9LT08	PSDE_ARATH	0
Scaffold	5331-976_5_ORF1	1085	>sp|Q54G05|LRRX1_DICDI_Putative_leucine-rich_repeat-containing_protein_DDB_G0290503_OS=Dictyostelium_discoideum_GN=DDB_G0290503_PE=4_SV=1|||0.002	5331-976_5_ORF1 (+1)	129 kDa	1	-0.26			notMapped		625				5331-976_5_ORF1	noOrthologue	noOrthologue	noOrthologue	notMapped
Scaffold	49877-360_3_ORF2	447	>sp|Q9LXC9|IPYR1_ARATH_Soluble_inorganic_pyrophosphatase_1,_chloroplastic_OS=Arabidopsis_thaliana_GN=PPA1_PE=1_SV=1|||8e-143	49877-360_3_ORF2	35 kDa	1	-0.26			mapped	D8QMR6	626	D8QMR6_SELML	1.46585e-134	tr|D8QMR6|D8QMR6_SELML	49877-360_3_ORF2	sp|Q9LXC9|IPYR6_ARATH	Q9LXC9	IPYR6_ARATH	7.50776e-140
Scaffold	295306-71_2_ORF1	283	Cluster of no_acceptable_match|||NA (295306-71_2_ORF1)	295306-71_2_ORF1 [3]	27 kDa	1	-0.26			mapped	D8R0M0	627	D8R0M0_SELML	2.41733e-91	tr|D8R0M0|D8R0M0_SELML	295306-71_2_ORF1	sp|P42761|GSTFA_ARATH	P42761	GSTFA_ARATH	5.62225e-77
Scaffold	262210-92_2_ORF1	888	Cluster of >sp|P54234|G6PI1_CLAAR_Glucose-6-phosphate_isomerase,_cytosolic_1_OS=Clarkia_arcuata_GN=PGIC1_PE=3_SV=1|||0 (262210-92_2_ORF1)	262210-92_2_ORF1 [16]	65 kDa	1	-0.26			mapped	D8RXP9	628	D8RXP9_SELML	0	tr|D8RXP9|D8RXP9_SELML	262210-92_2_ORF1	sp|P34795|G6PI_ARATH	P34795	G6PI_ARATH	0
Scaffold	184059-152_1_ORF2	1003	>sp|P27298|OPDA_ECOLI_Oligopeptidase_A_OS=Escherichia_coli_(strain_K12)_GN=prlC_PE=3_SV=3|||0	184059-152_1_ORF2	88 kDa	1	-0.26			mapped	D8S116	629	D8S116_SELML	0	tr|D8S116|D8S116_SELML	184059-152_1_ORF2	tr|A0A1R7T3A4|A0A1R7T3A4_ARATH	A0A1R7T3A4	A0A1R7T3A4_ARATH	0
Scaffold	10983-723_3_ORF2	207	Cluster of >sp|P51418|R18A2_ARATH_60S_ribosomal_protein_L18a-2_OS=Arabidopsis_thaliana_GN=RPL18AB_PE=1_SV=2|||5e-122 (10983-723_3_ORF2)	10983-723_3_ORF2 [2]	23 kDa	1	-0.26			mapped	D8QN40	630	D8QN40_SELML	4.83498e-112	tr|D8QN40|D8QN40_SELML	10983-723_3_ORF2	tr|A0A1P8AY36|A0A1P8AY36_ARATH	A0A1P8AY36	A0A1P8AY36_ARATH	1.98622e-119
Scaffold	194085-143_1_ORF2	47	>sp|O49816|LEA1_CICAR_Late_embryogenesis_abundant_protein_1_OS=Cicer_arietinum_PE=2_SV=1|||5e-09	194085-143_1_ORF2	13 kDa	1	-0.3			notMapped		631				194085-143_1_ORF2	noOrthologue	noOrthologue	noOrthologue	notMapped
Scaffold	223185-119_3_ORF2	286	Cluster of >sp|Q08069|RS8_MAIZE_40S_ribosomal_protein_S8_OS=Zea_mays_GN=RPS8_PE=2_SV=2|||2e-130 (223185-119_3_ORF2)	223185-119_3_ORF2 [4]	27 kDa	1	-0.31			mapped	D8QYB4	632	D8QYB4_SELML	5.75595e-107	tr|D8QYB4|D8QYB4_SELML	223185-119_3_ORF2	sp|Q9FIF3|RS82_ARATH	Q9FIF3	RS82_ARATH	1.91367e-113
Scaffold	tr|D8SZZ5|D8SZZ5_SELML	1033	Phosphorylase OS=Selaginella moellendorffii GN=PHS1 PE=3 SV=1	tr|D8SZZ5|D8SZZ5_SELML	97 kDa	1	-0.32			mapped	D8SZZ5	633	D8SZZ5_SELML	0	tr|D8SZZ5|D8SZZ5_SELML	tr|D8SZZ5|D8SZZ5_SELML	sp|Q9LIB2|PHS1_ARATH	Q9LIB2	PHS1_ARATH	0
Scaffold	tr|C5Z5K6|C5Z5K6_SORBI	654	Putative uncharacterized protein Sb10g023320 OS=Sorghum bicolor GN=Sb10g023320 PE=3 SV=1	tr|C5Z5K6|C5Z5K6_SORBI	47 kDa	1	-0.32			mapped	D8RGS0	634	D8RGS0_SELML	0	tr|D8RGS0|D8RGS0_SELML	tr|C5Z5K6|C5Z5K6_SORBI	sp|Q9C5U3|PRS8A_ARATH	Q9C5U3	PRS8A_ARATH	0
Scaffold	tr|C5XV28|C5XV28_SORBI	972	Cluster of Putative uncharacterized protein Sb04g036230 OS=Sorghum bicolor GN=Sb04g036230 PE=3 SV=1 (tr|C5XV28|C5XV28_SORBI)	tr|C5XV28|C5XV28_SORBI [15]	79 kDa	1	-0.32			mapped	D8QMV4	635	D8QMV4_SELML	0	tr|D8QMV4|D8QMV4_SELML	tr|C5XV28|C5XV28_SORBI	sp|P31414|AVP1_ARATH	P31414	AVP1_ARATH	0
Scaffold	tr|C1MKV6|C1MKV6_MICPC	1026	Predicted protein OS=Micromonas pusilla (strain CCMP1545) GN=MICPUCDRAFT_55474 PE=4 SV=1	tr|C1MKV6|C1MKV6_MICPC	95 kDa	1	-0.32			notMapped		636				tr|C1MKV6|C1MKV6_MICPC	sp|P31414|AVP1_ARATH	P31414	AVP1_ARATH	0
Scaffold	81796-278_4_ORF2	294	>sp|Q8LAH8|NDK4_ARATH_Nucleoside_diphosphate_kinase_IV,_chloroplastic/mitochondrial_OS=Arabidopsis_thaliana_GN=NDK4_PE=1_SV=2|||3e-109	81796-278_4_ORF2	28 kDa	1	-0.32			mapped	D8QXS8	637	D8QXS8_SELML	1.58937e-105	tr|D8QXS8|D8QXS8_SELML	81796-278_4_ORF2	sp|Q8LAH8|NDK4_ARATH	Q8LAH8	NDK4_ARATH	5.37159e-106
Scaffold	61848-322_5_ORF2	978	>sp|Q1PEP5|NUCL2_ARATH_Nucleolin_2_OS=Arabidopsis_thaliana_GN=NUCL2_PE=2_SV=1|||3e-50	61848-322_5_ORF2	81 kDa	1	-0.32			mapped	D8T4P3	638	D8T4P3_SELML	3.76765e-48	tr|D8T4P3|D8T4P3_SELML	61848-322_5_ORF2	sp|Q1PEP5|NUCL2_ARATH	Q1PEP5	NUCL2_ARATH	9.20369e-46
Scaffold	45247-378_5_ORF2	244	>sp|P49210|RL9_ORYSJ_60S_ribosomal_protein_L9_OS=Oryza_sativa_subsp._japonica_GN=RPL9_PE=2_SV=3|||7e-120	45247-378_5_ORF2	25 kDa	1	-0.32			mapped	D8SQ71	639	D8SQ71_SELML	2.57695e-119	tr|D8SQ71|D8SQ71_SELML	45247-378_5_ORF2	sp|Q9SZX9|RL92_ARATH	Q9SZX9	RL92_ARATH	1.63057e-105
Scaffold	326729-54_1_ORF2	360	Cluster of >sp|P52427|PSA4_SPIOL_Proteasome_subunit_alpha_type-4_OS=Spinacia_oleracea_GN=PAC1_PE=2_SV=1|||4e-160 (326729-54_1_ORF2)	326729-54_1_ORF2 [2]	31 kDa	1	-0.32			mapped	D8QW83	640	D8QW83_SELML	2.2158e-152	tr|D8QW83|D8QW83_SELML	326729-54_1_ORF2	sp|O81148|PSA4A_ARATH	O81148	PSA4A_ARATH	3.68587e-154
Scaffold	242722-104_3_ORF2	437	Cluster of >sp|Q43843|RPE_SOLTU_Ribulose-phosphate_3-epimerase,_chloroplastic_(Fragment)_OS=Solanum_tuberosum_PE=1_SV=1|||8e-166 (242722-104_3_ORF2)	242722-104_3_ORF2 [3]	34 kDa	1	-0.32			mapped	D8S0X1	641	D8S0X1_SELML	3.11465e-156	tr|D8S0X1|D8S0X1_SELML	242722-104_3_ORF2	tr|Q9SAU2|Q9SAU2_ARATH	Q9SAU2	Q9SAU2_ARATH	1.29402e-164
Scaffold	21036-544_1_ORF2	522	>sp|O80796|VIPP1_ARATH_Membrane-associated_protein_VIPP1,_chloroplastic_OS=Arabidopsis_thaliana_GN=VIPP1_PE=1_SV=1|||1e-132	21036-544_1_ORF2	39 kDa	1	-0.32			mapped	D8S5J7	642	D8S5J7_SELML	1.72678e-147	tr|D8S5J7|D8S5J7_SELML	21036-544_1_ORF2	tr|A0A178W0D3|A0A178W0D3_ARATH	A0A178W0D3	A0A178W0D3_ARATH	1.39274e-130
Scaffold	164534-174_5_ORF2	387	>sp|Q7Z9I4|YCP6_SCHPO_Uncharacterized_oxidoreductase_C663.06c_OS=Schizosaccharomyces_pombe_(strain_972_/_ATCC_24843)_GN=SPCC663.06c_PE=2_SV=1|||6e-32	164534-174_5_ORF2	32 kDa	1	-0.32			mapped	D8RF44	643	D8RF44_SELML	2.57537e-99	tr|D8RF44|D8RF44_SELML	164534-174_5_ORF2	tr|Q941A7|Q941A7_ARATH	Q941A7	Q941A7_ARATH	1.45122e-102
Scaffold	115571-230_4_ORF1	456	>sp|A1XBB7|IN21B_ORYSI_Protein_IN2-1_homolog_B_OS=Oryza_sativa_subsp._indica_GN=GSTZ5_PE=1_SV=1|||2e-80	115571-230_4_ORF1 (+7)	35 kDa	1	-0.32			mapped	D8RDL2	644	D8RDL2_SELML	1.39213e-18	tr|D8RDL2|D8RDL2_SELML	115571-230_4_ORF1	sp|Q9LZ06|GSTL3_ARATH	Q9LZ06	GSTL3_ARATH	6.1318e-75
Scaffold	215619-125_1_ORF2	384	Cluster of >sp|Q8W593|LGUC_ARATH_Probable_lactoylglutathione_lyase,_chloroplast_OS=Arabidopsis_thaliana_GN=At1g67280_PE=2_SV=1|||2e-151 (215619-125_1_ORF2)	215619-125_1_ORF2 [4]	32 kDa	1	-0.34			mapped	D8QQN0	645	D8QQN0_SELML	7.63164e-148	tr|D8QQN0|D8QQN0_SELML	215619-125_1_ORF2	sp|Q8W593|LGUC_ARATH	Q8W593	LGUC_ARATH	1.35242e-148
Scaffold	408900-20_1_ORF1	433	Cluster of >sp|Q9ZT91|EFTM_ARATH_Elongation_factor_Tu,_mitochondrial_OS=Arabidopsis_thaliana_GN=TUFA_PE=1_SV=1|||0 (408900-20_1_ORF1)	408900-20_1_ORF1 [4]	34 kDa	1	-0.35			mapped	D8S6G0	646	D8S6G0_SELML	0	tr|D8S6G0|D8S6G0_SELML	408900-20_1_ORF1	sp|Q9ZT91|EFTM_ARATH	Q9ZT91	EFTM_ARATH	0
Scaffold	400518-23_4_ORF2	125	>sp|P46516|HSP21_HELAN_17.9_kDa_class_II_heat_shock_protein_OS=Helianthus_annuus_GN=HSP17.9_PE=2_SV=1|||4e-48	400518-23_4_ORF2 (+1)	18 kDa	1	-0.35			mapped	D8QZ48	647	D8QZ48_SELML	1.77148e-42	tr|D8QZ48|D8QZ48_SELML	400518-23_4_ORF2	sp|P29830|HS176_ARATH	P29830	HS176_ARATH	2.49586e-39
Scaffold	108940-238_6_ORF2	407	>sp|Q42262|RS3A2_ARATH_40S_ribosomal_protein_S3a-2_OS=Arabidopsis_thaliana_GN=RPS3AB_PE=2_SV=3|||1e-157	108940-238_6_ORF2	33 kDa	1	-0.36			mapped	D8SVC4	648	D8SVC4_SELML	3.09161e-162	tr|D8SVC4|D8SVC4_SELML	108940-238_6_ORF2	sp|Q42262|RS3A2_ARATH	Q42262	RS3A2_ARATH	8.87467e-155
Scaffold	tr|A9NMQ0|A9NMQ0_PICSI	508	Cluster of Fructose-bisphosphate aldolase OS=Picea sitchensis PE=2 SV=1 (tr|A9NMQ0|A9NMQ0_PICSI)	tr|A9NMQ0|A9NMQ0_PICSI [10]	39 kDa	1	-0.38			mapped	D8RHM0	649	D8RHM0_SELML	0	tr|D8RHM0|D8RHM0_SELML	tr|A9NMQ0|A9NMQ0_PICSI	sp|Q9LF98|ALFC8_ARATH	Q9LF98	ALFC8_ARATH	0
Scaffold	70011-302_2_ORF1	702	Cluster of >sp|O82662|SUCB_ARATH_Succinyl-CoA_ligase_[ADP-forming]_subunit_beta,_mitochondrial_OS=Arabidopsis_thaliana_GN=At2g20420_PE=1_SV=1|||0 (70011-302_2_ORF1)	70011-302_2_ORF1 [4]	49 kDa	1	-0.38			mapped	D8S8J6	650	D8S8J6_SELML	0	tr|D8S8J6|D8S8J6_SELML	70011-302_2_ORF1	sp|O82662|SUCB_ARATH	O82662	SUCB_ARATH	0
Scaffold	135880-210_3_ORF2	251	>sp|Q8LDP4|CP19D_ARATH_Peptidyl-prolyl_cis-trans_isomerase_CYP19-4_OS=Arabidopsis_thaliana_GN=CYP19-4_PE=1_SV=2|||6e-115	135880-210_3_ORF2	25 kDa	1	-0.38			mapped	D8S966	651	D8S966_SELML	5.18483e-118	tr|D8S966|D8S966_SELML	135880-210_3_ORF2	sp|Q8LDP4|CP19D_ARATH	Q8LDP4	CP19D_ARATH	9.98421e-112
Scaffold	127720-217_3_ORF2	554	Cluster of >sp|Q43316|HEM3_ARATH_Porphobilinogen_deaminase,_chloroplastic_OS=Arabidopsis_thaliana_GN=HEMC_PE=1_SV=1|||0 (127720-217_3_ORF2)	127720-217_3_ORF2 [7]	41 kDa	1	-0.38			mapped	D8T3U1	652	D8T3U1_SELML	0	tr|D8T3U1|D8T3U1_SELML	127720-217_3_ORF2	sp|Q43316|HEM3_ARATH	Q43316	HEM3_ARATH	0
Scaffold	174433-162_1_ORF1	949	Cluster of >sp|Q754C8|EF2_ASHGO_Elongation_factor_2_OS=Ashbya_gossypii_(strain_ATCC_10895_/_CBS_109.51_/_FGSC_9923_/_NRRL_Y-1056)_GN=EFT1_PE=3_SV=1|||0 (174433-162_1_ORF1)	174433-162_1_ORF1 [12]	74 kDa	1	-0.39			mapped	D8RGJ4	653	D8RGJ4_SELML	0	tr|D8RGJ4|D8RGJ4_SELML	174433-162_1_ORF1	sp|Q9ASR1|EF2_ARATH	Q9ASR1	EF2_ARATH	0
Scaffold	287872-75_1_ORF1	411	Cluster of >sp|P93212|14337_SOLLC_14-3-3_protein_7_OS=Solanum_lycopersicum_GN=TFT7_PE=2_SV=2|||9e-155 (287872-75_1_ORF1)	287872-75_1_ORF1 [38]	33 kDa	1	-0.4			mapped	D8QV26	654	D8QV26_SELML	1.51955e-156	tr|D8QV26|D8QV26_SELML	287872-75_1_ORF1	sp|Q9C5W6|14312_ARATH	Q9C5W6	14312_ARATH	3.8348e-151
Scaffold	tr|Q6RFM0|Q6RFM0_PRUPE	107	Small heat shock protein OS=Prunus persica PE=2 SV=1	tr|Q6RFM0|Q6RFM0_PRUPE	17 kDa	1	-0.42			mapped	D8QZ48	655	D8QZ48_SELML	1.82997e-31	tr|D8QZ48|D8QZ48_SELML	tr|Q6RFM0|Q6RFM0_PRUPE	sp|P13853|HS17C_ARATH	P13853	HS17C_ARATH	7.53393e-78
Scaffold	tr|D5AD18|D5AD18_PICSI	116	Cluster of Putative uncharacterized protein OS=Picea sitchensis PE=2 SV=1 (tr|D5AD18|D5AD18_PICSI)	tr|D5AD18|D5AD18_PICSI [3]	18 kDa	1	-0.42			mapped	D8RZT0	656	D8RZT0_SELML	8.6255e-104	tr|D8RZT0|D8RZT0_SELML	tr|D5AD18|D5AD18_PICSI	sp|P34788|RS18_ARATH	P34788	RS18_ARATH	2.73522e-104
Scaffold	tr|A9NV11|A9NV11_PICSI	830	Putative uncharacterized protein OS=Picea sitchensis PE=2 SV=1	tr|A9NV11|A9NV11_PICSI	59 kDa	1	-0.42			mapped	D8R0W3	657	D8R0W3_SELML	0	tr|D8R0W3|D8R0W3_SELML	tr|A9NV11|A9NV11_PICSI	sp|Q94K05|TCPQ_ARATH	Q94K05	TCPQ_ARATH	0
Scaffold	tr|A2YI21|A2YI21_ORYSI	279	Putative uncharacterized protein OS=Oryza sativa subsp. indica GN=OsI_24850 PE=4 SV=1	tr|A2YI21|A2YI21_ORYSI (+3)	27 kDa	1	-0.42			mapped	D8TBL6	658	D8TBL6_SELML	2.09255e-95	tr|D8TBL6|D8TBL6_SELML	tr|A2YI21|A2YI21_ORYSI	sp|Q42029|PSBP1_ARATH	Q42029	PSBP1_ARATH	9.76935e-128
Scaffold	96650-254_4_ORF2	1018	>sp|P10333|MS2A_DROME_Accessory_gland-specific_peptide_26Aa_OS=Drosophila_melanogaster_GN=Acp26Aa_PE=2_SV=2|||4e-05	96650-254_4_ORF2	93 kDa	1	-0.42			notMapped		659				96650-254_4_ORF2	noOrthologue	noOrthologue	noOrthologue	notMapped
Scaffold	69050-304_1_ORF1	168	>sp|P49200|RS201_ARATH_40S_ribosomal_protein_S20-1_OS=Arabidopsis_thaliana_GN=RPS20A_PE=1_SV=2|||8e-76	69050-304_1_ORF1	21 kDa	1	-0.42			mapped	D8SF09	660	D8SF09_SELML	8.29396e-68	tr|D8SF09|D8SF09_SELML	69050-304_1_ORF1	sp|P49200|RS201_ARATH	P49200	RS201_ARATH	3.31476e-72
Scaffold	650-1895_4_ORF2	749	>sp|Q06915|EA6_ARATH_Probable_glucan_endo-1,3-beta-glucosidase_A6_OS=Arabidopsis_thaliana_GN=A6_PE=2_SV=1|||2e-135	650-1895_4_ORF2	52 kDa	1	-0.42			mapped	D8RZK5	661	D8RZK5_SELML	1.10611e-171	tr|D8RZK5|D8RZK5_SELML	650-1895_4_ORF2	tr|Q9SRT4|Q9SRT4_ARATH	Q9SRT4	Q9SRT4_ARATH	1.167e-152
Scaffold	54560-343_2_ORF2	593	>sp|P22045|PGFS_LEIMA_Prostaglandin_F_synthase_OS=Leishmania_major_GN=P100/11E_PE=1_SV=3|||8e-92	54560-343_2_ORF2 (+1)	43 kDa	1	-0.42			mapped	D8RH27	662	D8RH27_SELML	2.97008e-57	tr|D8RH27|D8RH27_SELML	54560-343_2_ORF2	tr|Q9SJV2|Q9SJV2_ARATH	Q9SJV2	Q9SJV2_ARATH	1.23835e-66
Scaffold	46589-373_1_ORF2	856	>sp|P29976|AROF_ARATH_Phospho-2-dehydro-3-deoxyheptonate_aldolase_1,_chloroplastic_OS=Arabidopsis_thaliana_GN=DHS1_PE=2_SV=2|||0	46589-373_1_ORF2	62 kDa	1	-0.42			mapped	D8T5J5	663	D8T5J5_SELML	0	tr|D8T5J5|D8T5J5_SELML	46589-373_1_ORF2	sp|P29976|AROF_ARATH	P29976	AROF_ARATH	0
Scaffold	4645-1023_3_ORF2	1056	Cluster of >sp|P21894|SYAC_BOMMO_Alanine--tRNA_ligase,_cytoplasmic_OS=Bombyx_mori_PE=1_SV=1|||0 (4645-1023_3_ORF2)	4645-1023_3_ORF2 [4]	107 kDa	1	-0.42			mapped	D8SHA2	664	D8SHA2_SELML	4.64306e-147	tr|D8SHA2|D8SHA2_SELML	4645-1023_3_ORF2	sp|P36428|SYA_ARATH	P36428	SYA_ARATH	0
Scaffold	3793-1105_1_ORF1	468	Cluster of >sp|Q9H0B6|KLC2_HUMAN_Kinesin_light_chain_2_OS=Homo_sapiens_GN=KLC2_PE=1_SV=1|||3e-08 (3793-1105_1_ORF1)	3793-1105_1_ORF1 [3]	36 kDa	1	-0.42			mapped	D8SQV0	665	D8SQV0_SELML	3.7643e-19	tr|D8SQV0|D8SQV0_SELML	3793-1105_1_ORF1	sp|Q93V84|FLXL1_ARATH	Q93V84	FLXL1_ARATH	5.95844e-47
Scaffold	378787-31_3_ORF2	385	>sp|Q9SE96|GEML1_ARATH_GEM-like_protein_1_OS=Arabidopsis_thaliana_GN=FIP1_PE=1_SV=1|||6e-82	378787-31_3_ORF2	32 kDa	1	-0.42			mapped	D8S4D8	666	D8S4D8_SELML	7.54239e-80	tr|D8S4D8|D8S4D8_SELML	378787-31_3_ORF2	sp|Q9SE96|GEML1_ARATH	Q9SE96	GEML1_ARATH	1.2556e-78
Scaffold	372464-34_1_ORF1	209	>sp|Q9MB35|PERQ_SEDLI_Peroxiredoxin_Q,_chloroplastic_(Fragment)_OS=Sedum_lineare_GN=PRXQ_PE=1_SV=1|||2e-100	372464-34_1_ORF1	23 kDa	1	-0.42			mapped	D8RQ35	667	D8RQ35_SELML	5.55457e-89	tr|D8RQ35|D8RQ35_SELML	372464-34_1_ORF1	sp|Q9LU86|PRXQ_ARATH	Q9LU86	PRXQ_ARATH	2.11116e-94
Scaffold	3457-1152_6_ORF2	500	>sp|Q8DJF2|RPIA_THEEB_Ribose-5-phosphate_isomerase_A_OS=Thermosynechococcus_elongatus_(strain_BP-1)_GN=rpiA_PE=3_SV=1|||8e-84	3457-1152_6_ORF2	38 kDa	1	-0.42			mapped	D8RIH7	668	D8RIH7_SELML	1.98966e-141	tr|D8RIH7|D8RIH7_SELML	3457-1152_6_ORF2	sp|Q9S726|RPI3_ARATH	Q9S726	RPI3_ARATH	6.68069e-47
Scaffold	3234-1184_1_ORF1	808	Cluster of >sp|C5C1C4|GLPK_BEUC1_Glycerol_kinase_OS=Beutenbergia_cavernae_(strain_ATCC_BAA-8_/_DSM_12333_/_NBRC_16432)_GN=glpK_PE=3_SV=1|||0 (3234-1184_1_ORF1)	3234-1184_1_ORF1 [3]	57 kDa	1	-0.42			mapped	D8SN88	669	D8SN88_SELML	0	tr|D8SN88|D8SN88_SELML	3234-1184_1_ORF1	sp|Q9M8L4|GLPK_ARATH	Q9M8L4	GLPK_ARATH	0
Scaffold	297295-70_3_ORF2	185	>sp|Q9SCY2|FKB13_ARATH_Peptidyl-prolyl_cis-trans_isomerase_FKBP13,_chloroplastic_OS=Arabidopsis_thaliana_GN=FKBP13_PE=1_SV=2|||4e-69	297295-70_3_ORF2 (+1)	22 kDa	1	-0.42			mapped	D8SQ81	670	D8SQ81_SELML	8.49372e-62	tr|D8SQ81|D8SQ81_SELML	297295-70_3_ORF2	sp|Q9SCY2|FKB13_ARATH	Q9SCY2	FKB13_ARATH	1.24167e-65
Scaffold	293577-72_3_ORF2	473	no_acceptable_match|||NA	293577-72_3_ORF2	36 kDa	1	-0.42			mapped	D8S5H8	671	D8S5H8_SELML	1.33505e-121	tr|D8S5H8|D8S5H8_SELML	293577-72_3_ORF2	sp|Q9FVR6|Y1222_ARATH	Q9FVR6	Y1222_ARATH	2.04116e-120
Scaffold	227298-115_5_ORF2	1008	Cluster of >sp|A2SJF9|SECA_METPP_Protein_translocase_subunit_SecA_OS=Methylibium_petroleiphilum_(strain_PM1)_GN=secA_PE=3_SV=1|||9e-06 (227298-115_5_ORF2)	227298-115_5_ORF2 [13]	90 kDa	1	-0.42			mapped	D8S722	672	D8S722_SELML	3.98e-49	tr|D8S722|D8S722_SELML	227298-115_5_ORF2	noOrthologue	noOrthologue	noOrthologue	notMapped
Scaffold	161087-178_2_ORF2	947	>sp|Q8H0U5|TIC62_ARATH_Protein_TIC_62,_chloroplastic_OS=Arabidopsis_thaliana_GN=TIC62_PE=1_SV=1|||7e-118	161087-178_2_ORF2 (+18)	73 kDa	1	-0.42			mapped	D8RQE1	673	D8RQE1_SELML	5.03697e-111	tr|D8RQE1|D8RQE1_SELML	161087-178_2_ORF2	sp|Q8H0U5|TIC62_ARATH	Q8H0U5	TIC62_ARATH	5.77161e-115
Scaffold	152409-192_5_ORF1	658	Cluster of no_acceptable_match|||NA (152409-192_5_ORF1)	152409-192_5_ORF1 [4]	47 kDa	1	-0.42			mapped	D8SN21	674	D8SN21_SELML	8.8707e-177	tr|D8SN21|D8SN21_SELML	152409-192_5_ORF1	sp|Q42545|FTSZ1_ARATH	Q42545	FTSZ1_ARATH	2.99272e-165
Scaffold	149166-199_4_ORF2	246	>sp|Q9SZC9|HMA6_ARATH_Copper-transporting_ATPase_PAA1,_chloroplastic_OS=Arabidopsis_thaliana_GN=PAA1_PE=2_SV=1|||5e-25	149166-199_4_ORF2	25 kDa	1	-0.42			mapped	D8T0I2	675	D8T0I2_SELML	1.5505e-28	tr|D8T0I2|D8T0I2_SELML	149166-199_4_ORF2	tr|A0A1P8B649|A0A1P8B649_ARATH	A0A1P8B649	A0A1P8B649_ARATH	1.65154e-22
Scaffold	12480-682_6_ORF2	100	>sp|P49107|PSAN_ARATH_Photosystem_I_reaction_center_subunit_N,_chloroplastic_OS=Arabidopsis_thaliana_GN=PSAN_PE=1_SV=2|||6e-52	12480-682_6_ORF2	17 kDa	1	-0.42			mapped	D8RRV0	676	D8RRV0_SELML	2.03594e-46	tr|D8RRV0|D8RRV0_SELML	12480-682_6_ORF2	sp|P49107|PSAN_ARATH	P49107	PSAN_ARATH	3.13138e-48
Scaffold	10257-745_6_ORF2	632	Cluster of >sp|A6T923|HPXO_KLEP7_FAD-dependent_urate_hydroxylase_OS=Klebsiella_pneumoniae_subsp._pneumoniae_(strain_ATCC_700721_/_MGH_78578)_GN=hpxO_PE=1_SV=1|||3e-33 (10257-745_6_ORF2)	10257-745_6_ORF2 [3]	46 kDa	1	-0.42			mapped	D8TB50	677	D8TB50_SELML	1.23471e-165	tr|D8TB50|D8TB50_SELML	10257-745_6_ORF2	sp|Q9FGC7|ZEP_ARATH	Q9FGC7	ZEP_ARATH	2.61985e-26
Scaffold	sp|A2T384|PSAC_ANGEV	9	Photosystem I iron-sulfur center OS=Angiopteris evecta GN=psaC PE=3 SV=1	sp|A2T384|PSAC_ANGEV (+4)	9 kDa	1	-0.44			mapped	C7B2J3	678	C7B2J3_SELML	2.13271e-43	tr|C7B2J3|C7B2J3_SELML	sp|A2T384|PSAC_ANGEV	sp|P62090|PSAC_ARATH	P62090	PSAC_ARATH	1.52907e-53
Scaffold	312530-61_5_ORF2	943	>sp|Q23892|GLUA_DICDI_Lysosomal_beta_glucosidase_OS=Dictyostelium_discoideum_GN=gluA_PE=1_SV=2|||9e-74	312530-61_5_ORF2	72 kDa	1	-0.46			mapped	D8SPR4	679	D8SPR4_SELML	0	tr|D8SPR4|D8SPR4_SELML	312530-61_5_ORF2	tr|A0A1P8BG25|A0A1P8BG25_ARATH	A0A1P8BG25	A0A1P8BG25_ARATH	0
Scaffold	97071-254_4_ORF1	371	no_acceptable_match|||NA	97071-254_4_ORF1	31 kDa	1	-0.49			mapped	D8SFL1	680	D8SFL1_SELML	9.44294e-56	tr|D8SFL1|D8SFL1_SELML	97071-254_4_ORF1	sp|Q9ZRW8|GSTUJ_ARATH	Q9ZRW8	GSTUJ_ARATH	6.95751e-54
Scaffold	396020-24_5_ORF2	408	>sp|Q54Z26|GLYC1_DICDI_Serine_hydroxymethyltransferase_1_OS=Dictyostelium_discoideum_GN=shmt1_PE=1_SV=1|||2e-133	396020-24_5_ORF2 (+1)	33 kDa	1	-0.49			mapped	D8RA85	681	D8RA85_SELML	1.25809e-168	tr|D8RA85|D8RA85_SELML	396020-24_5_ORF2	sp|O23254|GLYC4_ARATH	O23254	GLYC4_ARATH	5.43179e-156
Scaffold	280600-79_2_ORF2	90	>sp|P48384|TRXM_PEA_Thioredoxin_M-type,_chloroplastic_OS=Pisum_sativum_PE=2_SV=1|||3e-61	280600-79_2_ORF2 (+2)	17 kDa	1	-0.49			mapped	D8R2K2	682	D8R2K2_SELML	9.59638e-58	tr|D8R2K2|D8R2K2_SELML	280600-79_2_ORF2	sp|Q9SEU6|TRXM4_ARATH	Q9SEU6	TRXM4_ARATH	5.99475e-54
Scaffold	189606-147_1_ORF2	271	>sp|Q9SR70|FK164_ARATH_Peptidyl-prolyl_cis-trans_isomerase_FKBP16-4,_chloroplastic_OS=Arabidopsis_thaliana_GN=FKBP16-4_PE=1_SV=1|||7e-93	189606-147_1_ORF2	26 kDa	1	-0.49			mapped	D8QQC8	683	D8QQC8_SELML	1.47047e-86	tr|D8QQC8|D8QQC8_SELML	189606-147_1_ORF2	sp|Q9SR70|FK164_ARATH	Q9SR70	FK164_ARATH	1.34953e-89
Scaffold	115375-231_6_ORF2	121	no_acceptable_match|||NA	115375-231_6_ORF2	18 kDa	1	-0.49			mapped	D8QZ48	684	D8QZ48_SELML	4.56319e-34	tr|D8QZ48|D8QZ48_SELML	115375-231_6_ORF2	sp|P13853|HS17C_ARATH	P13853	HS17C_ARATH	2.01183e-57
Scaffold	24557-506_3_ORF2	381	Cluster of >sp|Q9SKX4|RK3A_ARATH_50S_ribosomal_protein_L3-1,_chloroplastic_OS=Arabidopsis_thaliana_GN=RPL3A_PE=1_SV=1|||4e-124 (24557-506_3_ORF2)	24557-506_3_ORF2 [4]	32 kDa	1	-0.51			mapped	D8TDN8	685	D8TDN8_SELML	1.07762e-130	tr|D8TDN8|D8TDN8_SELML	24557-506_3_ORF2	sp|Q9SKX4|RK3A_ARATH	Q9SKX4	RK3A_ARATH	5.36941e-121
Scaffold	163620-175_6_ORF2	575	Cluster of >sp|P41345|FENR2_ORYSJ_Ferredoxin--NADP_reductase,_root_isozyme,_chloroplastic_OS=Oryza_sativa_subsp._japonica_GN=Os03g0784700_PE=1_SV=1|||0 (163620-175_6_ORF2)	163620-175_6_ORF2 [5]	42 kDa	1	-0.51			notMapped		686				163620-175_6_ORF2	sp|Q9SK82|U85A1_ARATH	Q9SK82	U85A1_ARATH	1.26878e-49
Scaffold	tr|P93135|P93135_FRAAN	585	Cluster of Polyubiquitin OS=Fragaria ananassa GN=FUBI1 PE=2 SV=1 (tr|P93135|P93135_FRAAN)	tr|P93135|P93135_FRAAN [18]	43 kDa	1	-0.52			mapped	D8QSE0	687	D8QSE0_SELML	0	tr|D8QSE0|D8QSE0_SELML	tr|P93135|P93135_FRAAN	sp|Q8H159|UBQ10_ARATH	Q8H159	UBQ10_ARATH	0
Scaffold	20293-553_1_ORF2	351	Cluster of >sp|P93447|EF1D_PIMBR_Elongation_factor_1-delta_OS=Pimpinella_brachycarpa_PE=2_SV=3|||3e-95 (20293-553_1_ORF2)	20293-553_1_ORF2 [4]	30 kDa	1	-0.52			mapped	D8T6B0	688	D8T6B0_SELML	6.70391e-82	tr|D8T6B0|D8T6B0_SELML	20293-553_1_ORF2	sp|Q84WM9|EF1B1_ARATH	Q84WM9	EF1B1_ARATH	5.58446e-81
Scaffold	165503-173_3_ORF2	735	Cluster of >sp|Q9SSA5|CYP38_ARATH_Peptidyl-prolyl_cis-trans_isomerase_CYP38,_chloroplastic_OS=Arabidopsis_thaliana_GN=CYP38_PE=1_SV=1|||0 (165503-173_3_ORF2)	165503-173_3_ORF2 [4]	51 kDa	1	-0.53			mapped	D8RQF0	689	D8RQF0_SELML	6.06315e-146	tr|D8RQF0|D8RQF0_SELML	165503-173_3_ORF2	sp|Q9SSA5|CYP38_ARATH	Q9SSA5	CYP38_ARATH	0
Scaffold	369-2250_2_ORF2	802	>sp|Q9XI01|PDI11_ARATH_Protein_disulfide_isomerase-like_1-1_OS=Arabidopsis_thaliana_GN=PDIL1-1_PE=1_SV=1|||0	369-2250_2_ORF2	57 kDa	1	-0.54			mapped	D8R0G0	690	D8R0G0_SELML	0	tr|D8R0G0|D8R0G0_SELML	369-2250_2_ORF2	sp|Q9XI01|PDI11_ARATH	Q9XI01	PDI11_ARATH	0
Scaffold	284049-77_6_ORF2	651	>sp|Q9LYA9|CP41A_ARATH_Chloroplast_stem-loop_binding_protein_of_41_kDa_a,_chloroplastic_OS=Arabidopsis_thaliana_GN=CSP41A_PE=1_SV=1|||0	284049-77_6_ORF2	46 kDa	1	-0.54			mapped	D8T6L2	691	D8T6L2_SELML	0	tr|D8T6L2|D8T6L2_SELML	284049-77_6_ORF2	sp|Q9LYA9|CP41A_ARATH	Q9LYA9	CP41A_ARATH	0
Scaffold	tr|D7MBC8|D7MBC8_ARALL	1111	M protein repeat-containing protein OS=Arabidopsis lyrata subsp. lyrata GN=ARALYDRAFT_493421 PE=4 SV=1	tr|D7MBC8|D7MBC8_ARALL	192 kDa		-0.58			notMapped		692				tr|D7MBC8|D7MBC8_ARALL	sp|Q9M084|SYDC2_ARATH	Q9M084	SYDC2_ARATH	0
Scaffold	tr|D7MAI5|D7MAI5_ARALL	1121	Cluster of Predicted protein OS=Arabidopsis lyrata subsp. lyrata GN=ARALYDRAFT_658687 PE=4 SV=1 (tr|D7MAI5|D7MAI5_ARALL)	tr|D7MAI5|D7MAI5_ARALL [3]	252 kDa		-0.58			mapped	D8RRR0	693	D8RRR0_SELML	0	tr|D8RRR0|D8RRR0_SELML	tr|D7MAI5|D7MAI5_ARALL	sp|Q9SSD2|PRP8A_ARATH	Q9SSD2	PRP8A_ARATH	0
Scaffold	tr|C6SVT8|C6SVT8_SOYBN	229	Cluster of Putative uncharacterized protein OS=Glycine max PE=2 SV=1 (tr|C6SVT8|C6SVT8_SOYBN)	tr|C6SVT8|C6SVT8_SOYBN [9]	24 kDa	1	-0.58			mapped	D8RE14	694	D8RE14_SELML	2.02749e-120	tr|D8RE14|D8RE14_SELML	tr|C6SVT8|C6SVT8_SOYBN	sp|Q9FJH0|RAA1F_ARATH	Q9FJH0	RAA1F_ARATH	1.02577e-127
Scaffold	tr|A8J568|A8J568_CHLRE	1104	DNA-directed RNA polymerase (Fragment) OS=Chlamydomonas reinhardtii GN=RPA1 PE=3 SV=1	tr|A8J568|A8J568_CHLRE	164 kDa		-0.58			notMapped		695				tr|A8J568|A8J568_CHLRE	sp|Q9FMR9|RIN1_ARATH	Q9FMR9	RIN1_ARATH	0
Scaffold	sp|Q7SIB8|PLAS_DRYCA	22	Plastocyanin OS=Dryopteris crassirhizoma GN=PETE PE=1 SV=1	sp|Q7SIB8|PLAS_DRYCA	11 kDa	1	-0.58			mapped	D8R485	696	D8R485_SELML	1.63581e-14	tr|D8R485|D8R485_SELML	sp|Q7SIB8|PLAS_DRYCA	sp|P42699|PLAS2_ARATH	P42699	PLAS2_ARATH	3.09647e-16
Scaffold	rr|REV_B9HZV0|REV_B9HZV0_POPTR	939	Predicted protein OS=Populus trichocarpa GN=POPTRDRAFT_834106 PE=4 SV=1	rr|REV_B9HZV0|REV_B9HZV0_POPTR	71 kDa	1	-0.58			notMapped		697				rr|REV_B9HZV0|REV_B9HZV0_POPTR	tr|Q9SKZ0|Q9SKZ0_ARATH	Q9SKZ0	Q9SKZ0_ARATH	4.18317e-48
Scaffold	8279-816_3_ORF2	443	Cluster of >sp|P68209|SUCA1_ARATH_Succinyl-CoA_ligase_[ADP-forming]_subunit_alpha-1,_mitochondrial_OS=Arabidopsis_thaliana_GN=At5g08300_PE=1_SV=1|||0 (8279-816_3_ORF2)	8279-816_3_ORF2 [2]	35 kDa	1	-0.58			mapped	D8QZ28	698	D8QZ28_SELML	7.81236e-71	tr|D8QZ28|D8QZ28_SELML	8279-816_3_ORF2	sp|P68209|SUCA1_ARATH	P68209	SUCA1_ARATH	0
Scaffold	82680-277_1_ORF2	493	>sp|Q7Z9I4|YCP6_SCHPO_Uncharacterized_oxidoreductase_C663.06c_OS=Schizosaccharomyces_pombe_(strain_972_/_ATCC_24843)_GN=SPCC663.06c_PE=2_SV=1|||3e-27	82680-277_1_ORF2	37 kDa		-0.58			mapped	D8RF44	699	D8RF44_SELML	1.01066e-82	tr|D8RF44|D8RF44_SELML	82680-277_1_ORF2	tr|Q941A7|Q941A7_ARATH	Q941A7	Q941A7_ARATH	3.96815e-88
Scaffold	71945-297_5_ORF2	783	>sp|Q9LS40|ASPG1_ARATH_Protein_ASPARTIC_PROTEASE_IN_GUARD_CELL_1_OS=Arabidopsis_thaliana_GN=ASPG1_PE=1_SV=1|||1e-138	71945-297_5_ORF2	55 kDa	1	-0.58			mapped	D8R0S2	700	D8R0S2_SELML	4.45517e-142	tr|D8R0S2|D8R0S2_SELML	71945-297_5_ORF2	tr|Q9M356|Q9M356_ARATH	Q9M356	Q9M356_ARATH	2.91575e-142
Scaffold	65126-313_6_ORF2	1055	Cluster of >sp|O81643|VILI1_ARATH_Villin-1_OS=Arabidopsis_thaliana_GN=VLN1_PE=2_SV=2|||0 (65126-313_6_ORF2)	65126-313_6_ORF2 [3]	107 kDa	1	-0.58			mapped	D8S7L1	701	D8S7L1_SELML	0	tr|D8S7L1|D8S7L1_SELML	65126-313_6_ORF2	sp|O81644|VILI2_ARATH	O81644	VILI2_ARATH	0
Scaffold	63756-317_2_ORF1	54	>sp|P47920|NDKB_FLABI_Nucleoside_diphosphate_kinase_B_OS=Flaveria_bidentis_PE=2_SV=1|||3e-76	63756-317_2_ORF1 (+1)	14 kDa		-0.58			mapped	D8RHN0	702	D8RHN0_SELML	2.05266e-74	tr|D8RHN0|D8RHN0_SELML	63756-317_2_ORF1	sp|P39207|NDK1_ARATH	P39207	NDK1_ARATH	2.19954e-71
Scaffold	62782-319_2_ORF2	37	>sp|P00052|CYC_VIGRR_Cytochrome_c_OS=Vigna_radiata_var._radiata_PE=1_SV=1|||1e-72	62782-319_2_ORF2 (+4)	13 kDa		-0.58			notMapped		703				62782-319_2_ORF2	tr|Q8VYM6|Q8VYM6_ARATH	Q8VYM6	Q8VYM6_ARATH	0
Scaffold	50471-358_5_ORF2	728	Cluster of >sp|P25858|G3PC1_ARATH_Glyceraldehyde-3-phosphate_dehydrogenase_1,_cytosolic_OS=Arabidopsis_thaliana_GN=GAPC1_PE=1_SV=2|||0 (50471-358_5_ORF2)	50471-358_5_ORF2 [26]	51 kDa	1	-0.58			mapped	D8R3A6	704	D8R3A6_SELML	0	tr|D8R3A6|D8R3A6_SELML	50471-358_5_ORF2	sp|Q9SAJ6|G3PP1_ARATH	Q9SAJ6	G3PP1_ARATH	0
Scaffold	393073-25_4_ORF2	403	>sp|Q9SZJ5|GLYM_ARATH_Serine_hydroxymethyltransferase,_mitochondrial_OS=Arabidopsis_thaliana_GN=SHM1_PE=1_SV=1|||1e-118	393073-25_4_ORF2	33 kDa		-0.58			mapped	D8RPG2	705	D8RPG2_SELML	6.34534e-132	tr|D8RPG2|D8RPG2_SELML	393073-25_4_ORF2	sp|Q94JQ3|GLYP3_ARATH	Q94JQ3	GLYP3_ARATH	4.49503e-140
Scaffold	36225-421_1_ORF2	120	Cluster of >sp|Q9SIM4|RL141_ARATH_60S_ribosomal_protein_L14-1_OS=Arabidopsis_thaliana_GN=RPL14A_PE=2_SV=1|||7e-72 (36225-421_1_ORF2)	36225-421_1_ORF2 [3]	18 kDa	1	-0.58			mapped	D8QRX7	706	D8QRX7_SELML	1.37099e-72	tr|D8QRX7|D8QRX7_SELML	36225-421_1_ORF2	sp|Q9SIM4|RL141_ARATH	Q9SIM4	RL141_ARATH	2.61531e-68
Scaffold	340935-47_4_ORF1	293	>sp|Q9SXU1|PSA7_CICAR_Proteasome_subunit_alpha_type-7_OS=Cicer_arietinum_GN=PAD1_PE=2_SV=1|||3e-155	340935-47_4_ORF1	27 kDa	1	-0.58			mapped	D8QYL1	707	D8QYL1_SELML	3.81166e-153	tr|D8QYL1|D8QYL1_SELML	340935-47_4_ORF1	sp|O24616|PSA7B_ARATH	O24616	PSA7B_ARATH	3.85883e-148
Scaffold	334624-50_2_ORF2	179	>sp|Q9SW09|RS101_ARATH_40S_ribosomal_protein_S10-1_OS=Arabidopsis_thaliana_GN=RPS10A_PE=2_SV=1|||1e-80	334624-50_2_ORF2	22 kDa		-0.58			mapped	D8RD32	708	D8RD32_SELML	9.29355e-74	tr|D8RD32|D8RD32_SELML	334624-50_2_ORF2	sp|Q9SW09|RS101_ARATH	Q9SW09	RS101_ARATH	3.18035e-77
Scaffold	311596-62_2_ORF2	212	>sp|Q6AUR2|GLNB_ORYSJ_Nitrogen_regulatory_protein_P-II_homolog_OS=Oryza_sativa_subsp._japonica_GN=GLB_PE=2_SV=1|||9e-70	311596-62_2_ORF2	23 kDa		-0.58			mapped	D8QS61	709	D8QS61_SELML	3.8051e-53	tr|D8QS61|D8QS61_SELML	311596-62_2_ORF2	sp|Q9ZST4|GLNB_ARATH	Q9ZST4	GLNB_ARATH	3.27809e-62
Scaffold	28804-471_4_ORF2	367	>sp|O04492|DRB1_ARATH_Double-stranded_RNA-binding_protein_1_OS=Arabidopsis_thaliana_GN=DRB1_PE=1_SV=1|||1e-45	28804-471_4_ORF2 (+1)	31 kDa	1	-0.58			mapped	D8S1F4	710	D8S1F4_SELML	3.73173e-40	tr|D8S1F4|D8S1F4_SELML	28804-471_4_ORF2	tr|A0A1P8AQD8|A0A1P8AQD8_ARATH	A0A1P8AQD8	A0A1P8AQD8_ARATH	3.82773e-43
Scaffold	268570-87_5_ORF2	156	>sp|P72752|Y2009_SYNY3_Thylakoid_membrane_protein_ssl2009_OS=Synechocystis_sp._(strain_PCC_6803_/_Kazusa)_GN=ssl2009_PE=4_SV=1|||3e-07	268570-87_5_ORF2	20 kDa		-0.58			mapped	D8QUU9	711	D8QUU9_SELML	3.44724e-24	tr|D8QUU9|D8QUU9_SELML	268570-87_5_ORF2	tr|Q8H0X5|Q8H0X5_ARATH	Q8H0X5	Q8H0X5_ARATH	4.71725e-23
Scaffold	261407-92_2_ORF1	1092	>sp|Q8IID4|DYHC2_PLAF7_Dynein_heavy_chain-like_protein_PF11_0240_OS=Plasmodium_falciparum_(isolate_3D7)_GN=PF11_0240_PE=3_SV=1|||2e-05	261407-92_2_ORF1 (+1)	142 kDa		-0.58			notMapped		712				261407-92_2_ORF1	noOrthologue	noOrthologue	noOrthologue	notMapped
Scaffold	241667-105_2_ORF2	414	>sp|Q8S9M1|PAP13_ARATH_Probable_plastid-lipid-associated_protein_13,_chloroplastic_OS=Arabidopsis_thaliana_GN=PAP13_PE=1_SV=2|||1e-97	241667-105_2_ORF2	33 kDa	1	-0.58			mapped	D8T0X3	713	D8T0X3_SELML	8.88548e-80	tr|D8T0X3|D8T0X3_SELML	241667-105_2_ORF2	sp|Q8S9M1|PAP13_ARATH	Q8S9M1	PAP13_ARATH	2.0156e-94
Scaffold	234089-111_1_ORF2	711	>sp|Q9LF04|STAD1_ARATH_Acyl-[acyl-carrier-protein]_desaturase_1,_chloroplastic_OS=Arabidopsis_thaliana_GN=S-ACP-DES1_PE=1_SV=1|||0	234089-111_1_ORF2 (+1)	50 kDa		-0.58			mapped	D8RGS6	714	D8RGS6_SELML	0	tr|D8RGS6|D8RGS6_SELML	234089-111_1_ORF2	tr|F4IS32|F4IS32_ARATH	F4IS32	F4IS32_ARATH	0
Scaffold	227748-115_2_ORF2	320	Cluster of >sp|O04905|UMPK_ARATH_UMP/CMP_kinase_OS=Arabidopsis_thaliana_GN=PYR6_PE=1_SV=1|||3e-109 (227748-115_2_ORF2)	227748-115_2_ORF2 [2]	29 kDa		-0.58			mapped	D8ST91	715	D8ST91_SELML	2.1331e-106	tr|D8ST91|D8ST91_SELML	227748-115_2_ORF2	sp|O04905|KCY3_ARATH	O04905	KCY3_ARATH	5.61086e-106
Scaffold	223603-118_1_ORF1	611	>sp|P23981|AROA1_TOBAC_3-phosphoshikimate_1-carboxyvinyltransferase_1,_chloroplastic_OS=Nicotiana_tabacum_GN=EPSPS-1_PE=2_SV=1|||0	223603-118_1_ORF1 (+2)	44 kDa		-0.58			mapped	D8TBU1	716	D8TBU1_SELML	0	tr|D8TBU1|D8TBU1_SELML	223603-118_1_ORF1	sp|P05466|AROA_ARATH	P05466	AROA_ARATH	0
Scaffold	20230-554_5_ORF2	840	Cluster of >sp|P58223|Y4837_ARATH_KH_domain-containing_protein_At4g18375_OS=Arabidopsis_thaliana_GN=At4g18375_PE=2_SV=1|||3e-63 (20230-554_5_ORF2)	20230-554_5_ORF2 [3]	59 kDa	1	-0.58			notMapped		717				20230-554_5_ORF2	sp|Q9LES2|UBA2A_ARATH	Q9LES2	UBA2A_ARATH	3.12084e-31
Scaffold	18450-578_2_ORF1	265	>sp|Q9XER8|RAB7_GOSHI_Ras-related_protein_Rab7_OS=Gossypium_hirsutum_GN=RAB7_PE=2_SV=1|||3e-135	18450-578_2_ORF1 (+5)	26 kDa		-0.58			notMapped		718				18450-578_2_ORF1	tr|A0A1P8B1B8|A0A1P8B1B8_ARATH	A0A1P8B1B8	A0A1P8B1B8_ARATH	2.82247e-79
Scaffold	17420-593_1_ORF2	1040	>sp|P93655|LONM1_ARATH_Lon_protease_homolog_1,_mitochondrial_OS=Arabidopsis_thaliana_GN=LON1_PE=1_SV=2|||0	17420-593_1_ORF2 (+1)	100 kDa		-0.58			mapped	D8QXF0	719	D8QXF0_SELML	0	tr|D8QXF0|D8QXF0_SELML	17420-593_1_ORF2	sp|P93655|LONM1_ARATH	P93655	LONM1_ARATH	0
Scaffold	169514-167_2_ORF1	92	>sp|Q9M2W2|GSTL2_ARATH_Glutathione_S-transferase_L2,_chloroplastic_OS=Arabidopsis_thaliana_GN=GSTL2_PE=2_SV=1|||4e-33	169514-167_2_ORF1	17 kDa		-0.58			notMapped		720				169514-167_2_ORF1	sp|Q9M2W2|GSTL2_ARATH	Q9M2W2	GSTL2_ARATH	3.24021e-29
Scaffold	166897-171_5_ORF2	250	>sp|O82531|PSB1_PETHY_Proteasome_subunit_beta_type-1_OS=Petunia_hybrida_GN=PBF1_PE=2_SV=1|||6e-138	166897-171_5_ORF2	25 kDa		-0.58			mapped	D8RIL6	721	D8RIL6_SELML	6.04716e-126	tr|D8RIL6|D8RIL6_SELML	166897-171_5_ORF2	sp|P42742|PSB1_ARATH	P42742	PSB1_ARATH	1.65961e-129
Scaffold	162660-176_6_ORF1	556	no_acceptable_match|||NA	162660-176_6_ORF1	41 kDa		-0.58			mapped	D8SX57	722	D8SX57_SELML	4.73691e-66	tr|D8SX57|D8SX57_SELML	162660-176_6_ORF1	sp|P83291|NB5R2_ARATH	P83291	NB5R2_ARATH	5.94419e-132
Scaffold	152971-191_2_ORF2	778	Cluster of >sp|Q9SIE1|PAT_ARATH_Bifunctional_aspartate_aminotransferase_and_glutamate/aspartate-prephenate_aminotransferase_OS=Arabidopsis_thaliana_GN=PAT_PE=1_SV=2|||0 (152971-191_2_ORF2)	152971-191_2_ORF2 [8]	55 kDa	1	-0.58			mapped	D8R3H0	723	D8R3H0_SELML	0	tr|D8R3H0|D8R3H0_SELML	152971-191_2_ORF2	sp|Q9SIE1|PAT_ARATH	Q9SIE1	PAT_ARATH	0
Scaffold	151168-195_3_ORF2	183	>sp|Q9FDZ9|RL212_ARATH_60S_ribosomal_protein_L21-2_OS=Arabidopsis_thaliana_GN=RPL21E_PE=2_SV=1|||1e-102	151168-195_3_ORF2 (+2)	22 kDa	1	-0.58			mapped	D8RES0	724	D8RES0_SELML	1.0602e-97	tr|D8RES0|D8RES0_SELML	151168-195_3_ORF2	sp|Q9FDZ9|RL212_ARATH	Q9FDZ9	RL212_ARATH	2.87283e-99
Scaffold	141778-205_4_ORF2	521	>sp|Q8L770|CLPR3_ARATH_ATP-dependent_Clp_protease_proteolytic_subunit-related_protein_3,_chloroplastic_OS=Arabidopsis_thaliana_GN=CLPR3_PE=1_SV=1|||2e-139	141778-205_4_ORF2 (+1)	39 kDa		-0.58			mapped	D8S7T1	725	D8S7T1_SELML	1.52316e-136	tr|D8S7T1|D8S7T1_SELML	141778-205_4_ORF2	sp|Q8L770|CLPR3_ARATH	Q8L770	CLPR3_ARATH	1.72517e-136
Scaffold	140134-206_2_ORF2	23	>sp|O23755|EF2_BETVU_Elongation_factor_2_OS=Beta_vulgaris_PE=2_SV=1|||4e-54	140134-206_2_ORF2	11 kDa		-0.58			mapped	D8S547	726	D8S547_SELML	2.03993e-53	tr|D8S547|D8S547_SELML	140134-206_2_ORF2	tr|F4JB06|F4JB06_ARATH	F4JB06	F4JB06_ARATH	1.9997e-50
Scaffold	139597-207_6_ORF1	438	Cluster of >sp|Q8VEM8|MPCP_MOUSE_Phosphate_carrier_protein,_mitochondrial_OS=Mus_musculus_GN=Slc25a3_PE=1_SV=1|||8e-104 (139597-207_6_ORF1)	139597-207_6_ORF1 [7]	34 kDa		-0.58			mapped	D8QZ10	727	D8QZ10_SELML	2.8911e-134	tr|D8QZ10|D8QZ10_SELML	139597-207_6_ORF1	sp|Q9FMU6|MPCP3_ARATH	Q9FMU6	MPCP3_ARATH	4.07583e-136
Scaffold	12555-680_1_ORF2	1021	>sp|Q3MHH4|SYQ_BOVIN_Glutamine--tRNA_ligase_OS=Bos_taurus_GN=QARS_PE=2_SV=1|||0	12555-680_1_ORF2 (+1)	93 kDa		-0.58			mapped	D8S3R7	728	D8S3R7_SELML	0	tr|D8S3R7|D8S3R7_SELML	12555-680_1_ORF2	sp|Q8W4F3|SYQ_ARATH	Q8W4F3	SYQ_ARATH	0
Scaffold	1-12177_6_ORF2	462	>sp|Q85FL3|ACCD_ADICA_Acetyl-coenzyme_A_carboxylase_carboxyl_transferase_subunit_beta,_chloroplastic_OS=Adiantum_capillus-veneris_GN=accD_PE=2_SV=2|||0	1-12177_6_ORF2 (+16)	36 kDa		-0.58			mapped	D8QSK3	729	D8QSK3_SELML	3.45505e-123	tr|D8QSK3|D8QSK3_SELML	1-12177_6_ORF2	sp|P56765|ACCD_ARATH	P56765	ACCD_ARATH	5.21676e-130
Scaffold	31223-453_3_ORF2	190	Cluster of >sp|P32869|PSAD_CUCSA_Photosystem_I_reaction_center_subunit_II,_chloroplastic_OS=Cucumis_sativus_GN=psaD_PE=1_SV=1|||4e-100 (31223-453_3_ORF2)	31223-453_3_ORF2 [5]	22 kDa	1	-0.61			mapped	D8T8A4	730	D8T8A4_SELML	3.3944e-97	tr|D8T8A4|D8T8A4_SELML	31223-453_3_ORF2	sp|Q9SA56|PSAD2_ARATH	Q9SA56	PSAD2_ARATH	7.47753e-96
Scaffold	250083-99_2_ORF2	1031	Cluster of >sp|Q9LIB2|PHS1_ARATH_Alpha-glucan_phosphorylase_1_OS=Arabidopsis_thaliana_GN=PHS1_PE=1_SV=1|||0 (250083-99_2_ORF2)	250083-99_2_ORF2 [13]	96 kDa	1	-0.64			mapped	D8QTF4	731	D8QTF4_SELML	0	tr|D8QTF4|D8QTF4_SELML	250083-99_2_ORF2	sp|Q9SD76|PHS2_ARATH	Q9SD76	PHS2_ARATH	0
Scaffold	22356-529_5_ORF1	13	Cluster of >sp|P13853|HS17C_ARATH_17.6_kDa_class_I_heat_shock_protein_3_OS=Arabidopsis_thaliana_GN=HSP17.6C_PE=2_SV=2|||7e-39 (22356-529_5_ORF1)	22356-529_5_ORF1 [2]	9 kDa	1	-0.64			mapped	D8QMQ4	732	D8QMQ4_SELML	4.72959e-25	tr|D8QMQ4|D8QMQ4_SELML	22356-529_5_ORF1	sp|P13853|HS17C_ARATH	P13853	HS17C_ARATH	5.2556e-35
Scaffold	222487-119_2_ORF2	505	Cluster of >sp|P93819|MDHC1_ARATH_Malate_dehydrogenase,_cytoplasmic_1_OS=Arabidopsis_thaliana_GN=At1g04410_PE=1_SV=2|||0 (222487-119_2_ORF2)	222487-119_2_ORF2 [10]	38 kDa	1	-0.64			mapped	D8T711	733	D8T711_SELML	0	tr|D8T711|D8T711_SELML	222487-119_2_ORF2	sp|P93819|MDHC1_ARATH	P93819	MDHC1_ARATH	0
Scaffold	995-1674_3_ORF2	497	>sp|Q7JX57|U466_DROME_UPF0466_protein_CG17680,_mitochondrial_OS=Drosophila_melanogaster_GN=CG17680_PE=3_SV=1|||1e-06	995-1674_3_ORF2	38 kDa	1	-0.65			notMapped		734				995-1674_3_ORF2	noOrthologue	noOrthologue	noOrthologue	notMapped
Scaffold	156331-186_3_ORF2	266	>sp|Q9ZWR1|CFI_CITSI_Chalcone--flavonone_isomerase_OS=Citrus_sinensis_GN=CHI_PE=2_SV=1|||2e-61	156331-186_3_ORF2 (+1)	26 kDa	1	-0.65			mapped	D8SBL2	735	D8SBL2_SELML	1.1677e-29	tr|D8SBL2|D8SBL2_SELML	156331-186_3_ORF2	sp|P41088|CFI1_ARATH	P41088	CFI1_ARATH	6.88511e-56
Scaffold	tr|A9RNC0|A9RNC0_PHYPA	95	Cluster of Predicted protein OS=Physcomitrella patens subsp. patens GN=PHYPADRAFT_116985 PE=4 SV=1 (tr|A9RNC0|A9RNC0_PHYPA)	tr|A9RNC0|A9RNC0_PHYPA [6]	17 kDa	1	-0.68			mapped	D8QWY9	736	D8QWY9_SELML	1.01645e-100	tr|D8QWY9|D8QWY9_SELML	tr|A9RNC0|A9RNC0_PHYPA	sp|P59220|CALM7_ARATH	P59220	CALM7_ARATH	8.22226e-99
Scaffold	133552-212_2_ORF2	24	Cluster of >sp|P13939|LEAD7_GOSHI_Late_embryogenesis_abundant_protein_D-7_OS=Gossypium_hirsutum_PE=2_SV=1|||1e-09 (133552-212_2_ORF2)	133552-212_2_ORF2 [3]	11 kDa	1	-0.7			mapped	D8SV41	737	D8SV41_SELML	9.86243e-11	tr|D8SV41|D8SV41_SELML	133552-212_2_ORF2	sp|Q96270|LEA7_ARATH	Q96270	LEA7_ARATH	4.75816e-05
Scaffold	116706-229_5_ORF2	523	Cluster of >sp|Q7XT99|AKR2_ORYSJ_Probable_aldo-keto_reductase_2_OS=Oryza_sativa_subsp._japonica_GN=Os04g0338000_PE=2_SV=2|||3e-177 (116706-229_5_ORF2)	116706-229_5_ORF2 [24]	39 kDa	1	-0.73			mapped	D8RMC7	738	D8RMC7_SELML	9.29836e-170	tr|D8RMC7|D8RMC7_SELML	116706-229_5_ORF2	sp|Q93ZN2|ALKR4_ARATH	Q93ZN2	ALKR4_ARATH	8.33496e-173
Scaffold	tr|A9REG6|A9REG6_PHYPA	361	Cluster of Proteasome subunit alpha type OS=Physcomitrella patens subsp. patens GN=PHYPADRAFT_112471 PE=3 SV=1 (tr|A9REG6|A9REG6_PHYPA)	tr|A9REG6|A9REG6_PHYPA [5]	31 kDa	1	-0.74			mapped	D8SW69	739	D8SW69_SELML	6.93232e-150	tr|D8SW69|D8SW69_SELML	tr|A9REG6|A9REG6_PHYPA	sp|O23712|PSA1B_ARATH	O23712	PSA1B_ARATH	2.80297e-136
Scaffold	sp|Q0JM17|RH56_ORYSJ	688	Cluster of DEAD-box ATP-dependent RNA helicase 56 OS=Oryza sativa subsp. japonica GN=Os01g0549700 PE=2 SV=2 (sp|Q0JM17|RH56_ORYSJ)	sp|Q0JM17|RH56_ORYSJ [5]	49 kDa	1	-0.74			mapped	D8RFZ4	740	D8RFZ4_SELML	0	tr|D8RFZ4|D8RFZ4_SELML	sp|Q0JM17|RH56_ORYSJ	sp|Q56XG6|RH15_ARATH	Q56XG6	RH15_ARATH	0
Scaffold	60571-325_3_ORF2	328	>sp|Q25AG5|ERG3_ORYSI_Elicitor-responsive_protein_3_OS=Oryza_sativa_subsp._indica_GN=ERG3_PE=2_SV=1|||1e-31	60571-325_3_ORF2	29 kDa	1	-0.74			mapped	D8RPH2	741	D8RPH2_SELML	2.53166e-30	tr|D8RPH2|D8RPH2_SELML	60571-325_3_ORF2	sp|Q9C8S6|PP16B_ARATH	Q9C8S6	PP16B_ARATH	4.63584e-27
Scaffold	58787-330_2_ORF2	885	Cluster of >sp|Q9M0F9|K6PF1_ARATH_6-phosphofructokinase_1_OS=Arabidopsis_thaliana_GN=PFK1_PE=1_SV=1|||0 (58787-330_2_ORF2)	58787-330_2_ORF2 [9]	65 kDa	1	-0.74			mapped	D8RVK8	742	D8RVK8_SELML	0	tr|D8RVK8|D8RVK8_SELML	58787-330_2_ORF2	sp|Q94AA4|PFKA3_ARATH	Q94AA4	PFKA3_ARATH	0
Scaffold	3873-1098_5_ORF2	383	>sp|P42761|GSTFA_ARATH_Glutathione_S-transferase_F10_OS=Arabidopsis_thaliana_GN=GSTF10_PE=1_SV=3|||5e-70	3873-1098_5_ORF2	32 kDa	1	-0.74			mapped	D8T1M3	743	D8T1M3_SELML	5.36779e-81	tr|D8T1M3|D8T1M3_SELML	3873-1098_5_ORF2	sp|P42761|GSTFA_ARATH	P42761	GSTFA_ARATH	1.57682e-66
Scaffold	3343-1165_4_ORF2	901	>sp|O14297|YF1F_SCHPO_Uncharacterized_protein_C9E9.15_OS=Schizosaccharomyces_pombe_(strain_972_/_ATCC_24843)_GN=SPAC9E9.15_PE=2_SV=2|||2e-16	3343-1165_4_ORF2	66 kDa	1	-0.74			mapped	D8RXV5	744	D8RXV5_SELML	0	tr|D8RXV5|D8RXV5_SELML	3343-1165_4_ORF2	tr|Q8VYA4|Q8VYA4_ARATH	Q8VYA4	Q8VYA4_ARATH	0
Scaffold	30960-455_5_ORF2	378	Cluster of >sp|Q9SCM3|RS24_ARATH_40S_ribosomal_protein_S2-4_OS=Arabidopsis_thaliana_GN=RPS2D_PE=2_SV=1|||3e-145 (30960-455_5_ORF2)	30960-455_5_ORF2 [4]	32 kDa	1	-0.74			mapped	D8RUM6	745	D8RUM6_SELML	3.10074e-160	tr|D8RUM6|D8RUM6_SELML	30960-455_5_ORF2	sp|Q9SCM3|RS24_ARATH	Q9SCM3	RS24_ARATH	2.77043e-142
Scaffold	29332-467_4_ORF2	418	Cluster of >sp|Q42533|BCCP1_ARATH_Biotin_carboxyl_carrier_protein_of_acetyl-CoA_carboxylase_1,_chloroplastic_OS=Arabidopsis_thaliana_GN=BCCP1_PE=1_SV=2|||2e-65 (29332-467_4_ORF2)	29332-467_4_ORF2 [5]	33 kDa	1	-0.74			mapped	D8QX53	746	D8QX53_SELML	1.25711e-34	tr|D8QX53|D8QX53_SELML	29332-467_4_ORF2	sp|Q42533|BCCP1_ARATH	Q42533	BCCP1_ARATH	5.66746e-62
Scaffold	27236-483_5_ORF1	609	>sp|Q55512|DHAS_SYNY3_Aspartate-semialdehyde_dehydrogenase_OS=Synechocystis_sp._(strain_PCC_6803_/_Kazusa)_GN=asd_PE=3_SV=2|||6e-127	27236-483_5_ORF1	44 kDa	1	-0.74			mapped	D8RAY0	747	D8RAY0_SELML	0	tr|D8RAY0|D8RAY0_SELML	27236-483_5_ORF1	tr|Q8VYI4|Q8VYI4_ARATH	Q8VYI4	Q8VYI4_ARATH	0
Scaffold	270889-86_2_ORF2	965	>sp|Q9SSG3|HIPL1_ARATH_HIPL1_protein_OS=Arabidopsis_thaliana_GN=HIPL1_PE=1_SV=2|||0	270889-86_2_ORF2 (+1)	77 kDa	1	-0.74			mapped	D8RMA8	748	D8RMA8_SELML	0	tr|D8RMA8|D8RMA8_SELML	270889-86_2_ORF2	sp|Q9SSG3|HIPL1_ARATH	Q9SSG3	HIPL1_ARATH	0
Scaffold	265051-90_5_ORF1	353	>sp|B5YHE5|LEUD_THEYD_3-isopropylmalate_dehydratase_small_subunit_OS=Thermodesulfovibrio_yellowstonii_(strain_ATCC_51303_/_DSM_11347_/_YP87)_GN=leuD_PE=3_SV=1|||6e-38	265051-90_5_ORF1	30 kDa	1	-0.74			mapped	D8SLS4	749	D8SLS4_SELML	1.05814e-96	tr|D8SLS4|D8SLS4_SELML	265051-90_5_ORF1	sp|Q9ZW85|LEUD3_ARATH	Q9ZW85	LEUD3_ARATH	1.0825e-87
Scaffold	250817-99_2_ORF2	451	>sp|P95649|CBBY_RHOSH_Protein_CbbY_OS=Rhodobacter_sphaeroides_GN=cbbY_PE=3_SV=1|||6e-51	250817-99_2_ORF2	35 kDa	1	-0.74			mapped	D8QMI5	750	D8QMI5_SELML	6.15727e-121	tr|D8QMI5|D8QMI5_SELML	250817-99_2_ORF2	sp|Q94K71|CBBY_ARATH	Q94K71	CBBY_ARATH	6.24414e-131
Scaffold	248569-101_3_ORF1	348	Cluster of >sp|P92985|RBP1C_ARATH_Ran-binding_protein_1_homolog_c_OS=Arabidopsis_thaliana_GN=RANBP1C_PE=2_SV=1|||2e-76 (248569-101_3_ORF1)	248569-101_3_ORF1 [3]	30 kDa	1	-0.74			mapped	D8QU73	751	D8QU73_SELML	2.58498e-63	tr|D8QU73|D8QU73_SELML	248569-101_3_ORF1	sp|P92985|RBP1C_ARATH	P92985	RBP1C_ARATH	5.50198e-73
Scaffold	167311-170_6_ORF2	205	Cluster of >sp|Q9LEV3|CBSX3_ARATH_CBS_domain-containing_protein_CBSX3,_mitochondrial_OS=Arabidopsis_thaliana_GN=CBSX3_PE=1_SV=1|||7e-108 (167311-170_6_ORF2)	167311-170_6_ORF2 [2]	23 kDa	1	-0.74			mapped	D8RT33	752	D8RT33_SELML	2.38777e-100	tr|D8RT33|D8RT33_SELML	167311-170_6_ORF2	sp|Q9LEV3|CBSX3_ARATH	Q9LEV3	CBSX3_ARATH	1.18105e-104
Scaffold	156424-186_2_ORF1	301	>sp|P49332|GSTXC_TOBAC_Probable_glutathione_S-transferase_parC_OS=Nicotiana_tabacum_GN=PARC_PE=2_SV=1|||1e-74	156424-186_2_ORF1	28 kDa	1	-0.74			mapped	D8SFL1	753	D8SFL1_SELML	3.67638e-77	tr|D8SFL1|D8SFL1_SELML	156424-186_2_ORF1	sp|Q8L7C9|GSTUK_ARATH	Q8L7C9	GSTUK_ARATH	5.14492e-69
Scaffold	144148-203_5_ORF2	627	>sp|Q9SMZ2|PP347_ARATH_Pentatricopeptide_repeat-containing_protein_At4g33170_OS=Arabidopsis_thaliana_GN=PCMP-H53_PE=2_SV=1|||4e-56	144148-203_5_ORF2	45 kDa	1	-0.74			mapped	D8TEG8	754	D8TEG8_SELML	1.10783e-57	tr|D8TEG8|D8TEG8_SELML	144148-203_5_ORF2	sp|Q9SMZ2|PP347_ARATH	Q9SMZ2	PP347_ARATH	1.89435e-52
Scaffold	1422-1543_1_ORF2	926	Cluster of >sp|Q08636|NTPA_ENTHA_V-type_sodium_ATPase_catalytic_subunit_A_OS=Enterococcus_hirae_(strain_ATCC_9790_/_DSM_20160_/_JCM_8729_/_LMG_6399_/_NBRC_3181_/_NCIMB_6459_/_NCDO_1258)_GN=ntpA_PE=1_SV=1|||0 (1422-1543_1_ORF2)	1422-1543_1_ORF2 [2]	69 kDa	1	-0.74			mapped	D8RAI7	755	D8RAI7_SELML	0	tr|D8RAI7|D8RAI7_SELML	1422-1543_1_ORF2	sp|O23654|VATA_ARATH	O23654	VATA_ARATH	0
Scaffold	12493-682_6_ORF2	892	>sp|Q00612|G6PD1_MOUSE_Glucose-6-phosphate_1-dehydrogenase_X_OS=Mus_musculus_GN=G6pdx_PE=1_SV=3|||0	12493-682_6_ORF2 (+1)	65 kDa	1	-0.74			mapped	D8S287	756	D8S287_SELML	0	tr|D8S287|D8S287_SELML	12493-682_6_ORF2	sp|Q9FJI5|G6PD6_ARATH	Q9FJI5	G6PD6_ARATH	0
Scaffold	1033-1657_6_ORF2	794	>sp|P93033|FUM1_ARATH_Fumarate_hydratase_1,_mitochondrial_OS=Arabidopsis_thaliana_GN=FUM1_PE=1_SV=2|||0	1033-1657_6_ORF2 (+3)	56 kDa	1	-0.74			notMapped		757				1033-1657_6_ORF2	sp|F4IFC5|SYTM2_ARATH	F4IFC5	SYTM2_ARATH	0
Scaffold	85164-272_6_ORF2	345	>sp|P49204|RS42_ARATH_40S_ribosomal_protein_S4-2_OS=Arabidopsis_thaliana_GN=RPS4B_PE=2_SV=4|||1e-167	85164-272_6_ORF2	30 kDa	1	-0.77			mapped	D8RMP7	758	D8RMP7_SELML	2.61189e-164	tr|D8RMP7|D8RMP7_SELML	85164-272_6_ORF2	sp|Q8VYK6|RS43_ARATH	Q8VYK6	RS43_ARATH	9.27673e-165
Scaffold	10791-728_3_ORF2	158	Cluster of >sp|O65569|RS112_ARATH_40S_ribosomal_protein_S11-2_OS=Arabidopsis_thaliana_GN=RPS11B_PE=2_SV=2|||2e-87 (10791-728_3_ORF2)	10791-728_3_ORF2 [2]	21 kDa	1	-0.77			mapped	D8SHL8	759	D8SHL8_SELML	1.61838e-86	tr|D8SHL8|D8SHL8_SELML	10791-728_3_ORF2	sp|O65569|RS112_ARATH	O65569	RS112_ARATH	5.16969e-84
Scaffold	40155-402_5_ORF3	62	>sp|Q5EF31|PROF_CROSA_Profilin_OS=Crocus_sativus_PE=1_SV=1|||9e-65	40155-402_5_ORF3	14 kDa	1	-0.81			mapped	D8RML7	760	D8RML7_SELML	5.8776e-64	tr|D8RML7|D8RML7_SELML	40155-402_5_ORF3	sp|Q38905|PROF4_ARATH	Q38905	PROF4_ARATH	8.49316e-59
Scaffold	234337-110_2_ORF2	486	>sp|P28475|S6PD_MALDO_NADP-dependent_D-sorbitol-6-phosphate_dehydrogenase_OS=Malus_domestica_GN=S6PDH_PE=2_SV=1|||2e-163	234337-110_2_ORF2	37 kDa	1	-0.81			mapped	D8RE61	761	D8RE61_SELML	2.28306e-173	tr|D8RE61|D8RE61_SELML	234337-110_2_ORF2	tr|Q9SJV2|Q9SJV2_ARATH	Q9SJV2	Q9SJV2_ARATH	2.51264e-180
Scaffold	196342-141_2_ORF1	533	>sp|Q8H0U5|TIC62_ARATH_Protein_TIC_62,_chloroplastic_OS=Arabidopsis_thaliana_GN=TIC62_PE=1_SV=1|||7e-07	196342-141_2_ORF1	40 kDa	1	-0.81			notMapped		762				196342-141_2_ORF1	noOrthologue	noOrthologue	noOrthologue	notMapped
Scaffold	14065-645_3_ORF2	788	Cluster of >sp|Q9C5U8|HISX_ARATH_Histidinol_dehydrogenase,_chloroplastic_OS=Arabidopsis_thaliana_GN=HDH_PE=2_SV=1|||0 (14065-645_3_ORF2)	14065-645_3_ORF2 [4]	55 kDa	1	-0.81			mapped	D8RLE5	763	D8RLE5_SELML	0	tr|D8RLE5|D8RLE5_SELML	14065-645_3_ORF2	sp|Q9C5U8|HIS8_ARATH	Q9C5U8	HIS8_ARATH	0
Scaffold	70427-301_2_ORF2	340	>sp|Q9C8S6|Y1322_ARATH_C2_domain-containing_protein_At1g63220_OS=Arabidopsis_thaliana_GN=At1g63220_PE=1_SV=1|||6e-32	70427-301_2_ORF2	30 kDa	1	-0.83			mapped	D8RPH2	764	D8RPH2_SELML	6.44461e-26	tr|D8RPH2|D8RPH2_SELML	70427-301_2_ORF2	sp|Q9C8S6|PP16B_ARATH	Q9C8S6	PP16B_ARATH	9.9838e-28
Scaffold	tr|C1MUX5|C1MUX5_MICPC	596	Putative uncharacterized protein GAPDH_1 OS=Micromonas pusilla (strain CCMP1545) GN=GAPDH_1 PE=3 SV=1	tr|C1MUX5|C1MUX5_MICPC	43 kDa	1	-0.85			mapped	D8RYE0	765	D8RYE0_SELML	5.95174e-177	tr|D8RYE0|D8RYE0_SELML	tr|C1MUX5|C1MUX5_MICPC	sp|P25858|G3PC1_ARATH	P25858	G3PC1_ARATH	2.56004e-174
Scaffold	sp|O23894|PRS6A_BRACM	667	Cluster of 26S protease regulatory subunit 6A homolog OS=Brassica campestris GN=TBP1 PE=2 SV=1 (sp|O23894|PRS6A_BRACM)	sp|O23894|PRS6A_BRACM [6]	47 kDa	1	-0.85			notMapped		766				sp|O23894|PRS6A_BRACM	sp|Q9ASR1|EF2_ARATH	Q9ASR1	EF2_ARATH	0
Scaffold	29489-466_3_ORF1	1044	Cluster of >sp|P53620|COPG1_BOVIN_Coatomer_subunit_gamma-1_OS=Bos_taurus_GN=COPG1_PE=1_SV=1|||0 (29489-466_3_ORF1)	29489-466_3_ORF1 [7]	103 kDa	1	-0.85			mapped	D8SJW9	767	D8SJW9_SELML	0	tr|D8SJW9|D8SJW9_SELML	29489-466_3_ORF1	sp|Q0WW26|COPG_ARATH	Q0WW26	COPG_ARATH	0
Scaffold	276149-82_4_ORF2	278	>sp|Q6BMK0|G3P_DEBHA_Glyceraldehyde-3-phosphate_dehydrogenase_OS=Debaryomyces_hansenii_(strain_ATCC_36239_/_CBS_767_/_JCM_1990_/_NBRC_0083_/_IGC_2968)_GN=GPD_PE=3_SV=1|||3e-64	276149-82_4_ORF2	27 kDa	1	-0.85			mapped	D8SHZ3	768	D8SHZ3_SELML	5.48193e-79	tr|D8SHZ3|D8SHZ3_SELML	276149-82_4_ORF2	sp|Q5E924|G3PP2_ARATH	Q5E924	G3PP2_ARATH	5.30096e-78
Scaffold	ZZ_FGCZCont0203	786	Cluster of gi|109048|pir||S22025 keratin type II, KII-9, hair - sheep gi|1308 (X6 (ZZ_FGCZCont0203)	ZZ_FGCZCont0203 [18]	55 kDa	1	-0.87			notMapped		769				ZZ_FGCZCont0203	tr|Q8H0S3|Q8H0S3_ARATH	Q8H0S3	Q8H0S3_ARATH	0
Scaffold	69882-302_6_ORF2	1036	>sp|O23647|GLGB1_ARATH_1,4-alpha-glucan-branching_enzyme_2-1,_chloroplastic/amyloplastic_OS=Arabidopsis_thaliana_GN=SBE2.1_PE=1_SV=1|||0	69882-302_6_ORF2	99 kDa	1	-0.87			mapped	D8QQC2	770	D8QQC2_SELML	0	tr|D8QQC2|D8QQC2_SELML	69882-302_6_ORF2	sp|Q9LZS3|GLGB2_ARATH	Q9LZS3	GLGB2_ARATH	0
Scaffold	170237-166_5_ORF2	944	Cluster of no_acceptable_match|||NA (170237-166_5_ORF2)	170237-166_5_ORF2 [3]	72 kDa	1	-0.87			mapped	D8R0Q3	771	D8R0Q3_SELML	0	tr|D8R0Q3|D8R0Q3_SELML	170237-166_5_ORF2	sp|Q9SCY0|PGMP_ARATH	Q9SCY0	PGMP_ARATH	0
Scaffold	160515-179_2_ORF2	687	>sp|Q43314|DHE1_ARATH_Glutamate_dehydrogenase_1_OS=Arabidopsis_thaliana_GN=GDH1_PE=1_SV=1|||0	160515-179_2_ORF2	49 kDa	1	-0.87			mapped	D8TB19	772	D8TB19_SELML	0	tr|D8TB19|D8TB19_SELML	160515-179_2_ORF2	sp|Q43314|DHE1_ARATH	Q43314	DHE1_ARATH	0
Scaffold	195-2609_5_ORF2	219	Cluster of >sp|Q41932|PSBQ2_ARATH_Oxygen-evolving_enhancer_protein_3-2,_chloroplastic_OS=Arabidopsis_thaliana_GN=PSBQ2_PE=1_SV=2|||1e-80 (195-2609_5_ORF2)	195-2609_5_ORF2 [8]	24 kDa	1	-0.88			mapped	D8S1M9	773	D8S1M9_SELML	2.72723e-52	tr|D8S1M9|D8S1M9_SELML	195-2609_5_ORF2	sp|Q41932|PSBQ2_ARATH	Q41932	PSBQ2_ARATH	3.05074e-77
Scaffold	238552-107_5_ORF2	649	>sp|Q06303|AER4_AERHY_Aerolysin-4_OS=Aeromonas_hydrophila_GN=ahh4_PE=3_SV=1|||6e-09	238552-107_5_ORF2 (+2)	46 kDa	1	-0.89			notMapped		774				238552-107_5_ORF2	noOrthologue	noOrthologue	noOrthologue	notMapped
Scaffold	166151-172_2_ORF1	359	no_acceptable_match|||NA	166151-172_2_ORF1 (+1)	31 kDa	1	-0.89			mapped	D8RM75	775	D8RM75_SELML	7.2342e-116	tr|D8RM75|D8RM75_SELML	166151-172_2_ORF1	tr|B6EUA5|B6EUA5_ARATH	B6EUA5	B6EUA5_ARATH	2.60355e-118
Scaffold	93977-258_2_ORF1	793	>sp|P48641|GSHRC_ARATH_Glutathione_reductase,_cytosolic_OS=Arabidopsis_thaliana_GN=At3g24170_PE=2_SV=1|||0	93977-258_2_ORF1	56 kDa	1	-0.91			mapped	D8QML3	776	D8QML3_SELML	0	tr|D8QML3|D8QML3_SELML	93977-258_2_ORF1	sp|P48641|GSHRC_ARATH	P48641	GSHRC_ARATH	0
Scaffold	187068-149_1_ORF2	761	Cluster of >sp|P92947|MDARP_ARATH_Monodehydroascorbate_reductase,_chloroplastic_OS=Arabidopsis_thaliana_GN=At1g63940_PE=2_SV=3|||0 (187068-149_1_ORF2)	187068-149_1_ORF2 [11]	53 kDa	1	-0.92			mapped	D8RD19	777	D8RD19_SELML	0	tr|D8RD19|D8RD19_SELML	187068-149_1_ORF2	sp|P92947|MDAR_ARATH	P92947	MDAR_ARATH	0
Scaffold	333405-51_2_ORF1	139	Cluster of >sp|O07572|YHJR_BACSU_Uncharacterized_protein_YhjR_OS=Bacillus_subtilis_(strain_168)_GN=yhjR_PE=4_SV=1|||8e-07 (333405-51_2_ORF1)	333405-51_2_ORF1 [2]	19 kDa	1	-0.94			notMapped		778				333405-51_2_ORF1	noOrthologue	noOrthologue	noOrthologue	notMapped
Scaffold	279641-80_3_ORF1	527	>sp|O81155|CYSKP_SOLTU_Cysteine_synthase,_chloroplastic/chromoplastic_OS=Solanum_tuberosum_PE=2_SV=1|||0	279641-80_3_ORF1 (+1)	39 kDa	1	-0.94			mapped	D8RT31	779	D8RT31_SELML	5.86867e-174	tr|D8RT31|D8RT31_SELML	279641-80_3_ORF1	sp|P47998|CYSK1_ARATH	P47998	CYSK1_ARATH	4.18224e-170
Scaffold	261006-92_2_ORF2	1106	Cluster of >sp|Q9SAC6|GWD1_ARATH_Alpha-glucan_water_dikinase_1,_chloroplastic_OS=Arabidopsis_thaliana_GN=GWD1_PE=1_SV=2|||0 (261006-92_2_ORF2)	261006-92_2_ORF2 [8]	166 kDa	1	-0.97			mapped	D8SG17	780	D8SG17_SELML	0	tr|D8SG17|D8SG17_SELML	261006-92_2_ORF2	sp|Q9SAC6|GWD1_ARATH	Q9SAC6	GWD1_ARATH	0
Scaffold	ZZ_FGCZCont0172	1	Trypa5|PromTArt5 Promega trypsin artifact 5 K to R mods (2239.1, 2914)	ZZ_FGCZCont0172 (+1)	6 kDa	1	-1	1	DOC	notMapped		781				ZZ_FGCZCont0172	tr|Q8H0S3|Q8H0S3_ARATH	Q8H0S3	Q8H0S3_ARATH	0
Scaffold	tr|Q7YLQ8|Q7YLQ8_9CONI	235	Small ribosomal protein 4 (Fragment) OS=Phyllocladus aspleniifolius GN=rps4 PE=3 SV=1	tr|Q7YLQ8|Q7YLQ8_9CONI	25 kDa	1	-1	1	DOC	notMapped		782				tr|Q7YLQ8|Q7YLQ8_9CONI	sp|O03042|RBL_ARATH	O03042	RBL_ARATH	0
Scaffold	tr|Q53J16|Q53J16_SOLLC	164	Pollen-specific protein SF3, putative OS=Solanum lycopersicum GN=LES1_20t00012 PE=4 SV=1	tr|Q53J16|Q53J16_SOLLC (+1)	21 kDa	1	-1	1	DOC	notMapped		783				tr|Q53J16|Q53J16_SOLLC	sp|P56799|RR4_ARATH	P56799	RR4_ARATH	7.62806e-70
Scaffold	tr|Q39177|Q39177_ARATH	997	PEARLI 4 protein OS=Arabidopsis thaliana GN=pEARLI 4 PE=2 SV=1	tr|Q39177|Q39177_ARATH (+1)	87 kDa	1	-1	1	DOC	notMapped		784				tr|Q39177|Q39177_ARATH	sp|P29516|TBB8_ARATH	P29516	TBB8_ARATH	0
Scaffold	tr|D7M063|D7M063_ARALL	917	Cluster of Glycosyl hydrolase family 3 protein OS=Arabidopsis lyrata subsp. lyrata GN=ARALYDRAFT_489005 PE=4 SV=1 (tr|D7M063|D7M063_ARALL)	tr|D7M063|D7M063_ARALL [5]	68 kDa	1	-1	1	DOC	mapped	D8SUV4	785	D8SUV4_SELML	0	tr|D8SUV4|D8SUV4_SELML	tr|D7M063|D7M063_ARALL	tr|A0A1P8BG25|A0A1P8BG25_ARATH	A0A1P8BG25	A0A1P8BG25_ARATH	0
Scaffold	tr|B9SCE5|B9SCE5_RICCO	657	Cluster of 26S protease regulatory subunit 6b, putative OS=Ricinus communis GN=RCOM_1270490 PE=3 SV=1 (tr|B9SCE5|B9SCE5_RICCO)	tr|B9SCE5|B9SCE5_RICCO [5]	47 kDa	1	-1	1	DOC	mapped	D8QPT3	786	D8QPT3_SELML	0	tr|D8QPT3|D8QPT3_SELML	tr|B9SCE5|B9SCE5_RICCO	sp|Q9SEI4|PRS6B_ARATH	Q9SEI4	PRS6B_ARATH	0
Scaffold	tr|B9N1K1|B9N1K1_POPTR	598	Predicted protein OS=Populus trichocarpa GN=POPTRDRAFT_827624 PE=4 SV=1	tr|B9N1K1|B9N1K1_POPTR	43 kDa	1	-1	1	DOC	mapped	D8RWG1	787	D8RWG1_SELML	0	tr|D8RWG1|D8RWG1_SELML	tr|B9N1K1|B9N1K1_POPTR	sp|Q42536|PORA_ARATH	Q42536	PORA_ARATH	0
Scaffold	tr|A4S501|A4S501_OSTLU	787	Predicted protein OS=Ostreococcus lucimarinus (strain CCE9901) GN=OSTLU_88658 PE=3 SV=1	tr|A4S501|A4S501_OSTLU	55 kDa	1	-1	1	DOC	mapped	D8R3T7	788	D8R3T7_SELML	0	tr|D8R3T7|D8R3T7_SELML	tr|A4S501|A4S501_OSTLU	sp|Q8H104|SYDC1_ARATH	Q8H104	SYDC1_ARATH	0
Scaffold	sp|Q9SIV2|RPN1A_ARATH	1035	Cluster of 26S proteasome non-ATPase regulatory subunit 2 1A OS=Arabidopsis thaliana GN=RPN1A PE=1 SV=2 (sp|Q9SIV2|RPN1A_ARATH)	sp|Q9SIV2|RPN1A_ARATH [5]	98 kDa	1	-1	1	DOC	mapped	D8SM49	789	D8SM49_SELML	0	tr|D8SM49|D8SM49_SELML	sp|Q9SIV2|RPN1A_ARATH	sp|Q9SIV2|PSD2A_ARATH	Q9SIV2	PSD2A_ARATH	0
Scaffold	sp|Q8W593-2|LGUC_ARATH	331	Isoform 2 of Probable lactoylglutathione lyase, chloroplast OS=Arabidopsis thaliana GN=At1g67280	sp|Q8W593-2|LGUC_ARATH (+2)	29 kDa	1	-1	1	DOC	notMapped		790				sp|Q8W593-2|LGUC_ARATH	sp|Q8GTY0|EF1A4_ARATH	Q8GTY0	EF1A4_ARATH	0
Scaffold	sp|P00075|CYC_ENTIN	27	Cytochrome c OS=Enteromorpha intestinalis PE=1 SV=1	sp|P00075|CYC_ENTIN (+1)	12 kDa	1	-1	1	DOC	notMapped		791				sp|P00075|CYC_ENTIN	sp|Q9T0G2|CYC2_ARATH	Q9T0G2	CYC2_ARATH	2.89975e-71
Scaffold	rr|REV_C1E6C0|REV_C1E6C0_MICSR	1120	Predicted protein OS=Micromonas sp. (strain RCC299 / NOUM17) GN=MICPUN_58612 PE=4 SV=1	rr|REV_C1E6C0|REV_C1E6C0_MICSR	251 kDa	1	-1	1	DOC	notMapped		792				rr|REV_C1E6C0|REV_C1E6C0_MICSR	tr|Q9SKZ0|Q9SKZ0_ARATH	Q9SKZ0	Q9SKZ0_ARATH	4.18317e-48
Scaffold	9198-780_6_ORF2	149	>sp|P42732|RR13_ARATH_30S_ribosomal_protein_S13,_chloroplastic_OS=Arabidopsis_thaliana_GN=RPS13_PE=2_SV=1|||3e-57	9198-780_6_ORF2	20 kDa	1	-1	1	DOC	mapped	D8QSU4	793	D8QSU4_SELML	2.59267e-53	tr|D8QSU4|D8QSU4_SELML	9198-780_6_ORF2	sp|P42732|RR13_ARATH	P42732	RR13_ARATH	1.13915e-53
Scaffold	681-1862_1_ORF2	814	>sp|Q9SMT7|4CLLA_ARATH_4-coumarate--CoA_ligase-like_10_OS=Arabidopsis_thaliana_GN=4CLL10_PE=2_SV=1|||0	681-1862_1_ORF2	58 kDa	1	-1	1	DOC	mapped	D8T4S9	794	D8T4S9_SELML	0	tr|D8T4S9|D8T4S9_SELML	681-1862_1_ORF2	sp|Q9SMT7|4CLLA_ARATH	Q9SMT7	4CLLA_ARATH	0
Scaffold	423746-11_3_ORF1	50	Cluster of >sp|P49332|GSTXC_TOBAC_Probable_glutathione_S-transferase_parC_OS=Nicotiana_tabacum_GN=PARC_PE=2_SV=1|||3e-23 (423746-11_3_ORF1)	423746-11_3_ORF1 [2]	14 kDa	1	-1	1	DOC	mapped	D8SFK6	795	D8SFK6_SELML	3.34571e-17	tr|D8SFK6|D8SFK6_SELML	423746-11_3_ORF1	sp|Q8L7C9|GSTUK_ARATH	Q8L7C9	GSTUK_ARATH	2.22255e-16
Scaffold	374659-33_3_ORF2	744	Cluster of >sp|Q2VIR3|IF2GL_HUMAN_Putative_eukaryotic_translation_initiation_factor_2_subunit_3-like_protein_OS=Homo_sapiens_GN=EIF2S3L_PE=5_SV=2|||0 (374659-33_3_ORF2)	374659-33_3_ORF2 [4]	52 kDa	1	-1	1	DOC	mapped	D8RMF8	796	D8RMF8_SELML	0	tr|D8RMF8|D8RMF8_SELML	374659-33_3_ORF2	tr|O64490|O64490_ARATH	O64490	O64490_ARATH	0
Scaffold	373594-34_6_ORF1	933	Cluster of >sp|Q8H103|G6PIP_ARATH_Glucose-6-phosphate_isomerase_1,_chloroplastic_OS=Arabidopsis_thaliana_GN=PGI1_PE=1_SV=1|||0 (373594-34_6_ORF1)	373594-34_6_ORF1 [7]	70 kDa	1	-1	1	DOC	mapped	D8RGX3	797	D8RGX3_SELML	0	tr|D8RGX3|D8RGX3_SELML	373594-34_6_ORF1	sp|Q8H103|G6PIP_ARATH	Q8H103	G6PIP_ARATH	0
Scaffold	354891-42_3_ORF1	410	>sp|Q9EQU5|SET_MOUSE_Protein_SET_OS=Mus_musculus_GN=Set_PE=1_SV=1|||5e-57	354891-42_3_ORF1 (+1)	33 kDa	1	-1	1	DOC	mapped	D8RH30	798	D8RH30_SELML	4.29074e-120	tr|D8RH30|D8RH30_SELML	354891-42_3_ORF1	sp|Q8LC68|NRP2_ARATH	Q8LC68	NRP2_ARATH	4.86647e-99
Scaffold	3290-1177_2_ORF2	540	>sp|Q42965|NRL4A_TOBAC_Bifunctional_nitrilase/nitrile_hydratase_NIT4A_OS=Nicotiana_tabacum_GN=NIT4A_PE=2_SV=1|||0	3290-1177_2_ORF2	40 kDa	1	-1	1	DOC	mapped	D8RIH8	799	D8RIH8_SELML	1.19303e-172	tr|D8RIH8|D8RIH8_SELML	3290-1177_2_ORF2	sp|P46011|NRL4_ARATH	P46011	NRL4_ARATH	0
Scaffold	299332-69_5_ORF2	715	>sp|Q93ZG9|FKB53_ARATH_Peptidyl-prolyl_cis-trans_isomerase_FKBP53_OS=Arabidopsis_thaliana_GN=FKBP53_PE=1_SV=1|||2e-41	299332-69_5_ORF2	50 kDa	1	-1	1	DOC	mapped	D8T268	800	D8T268_SELML	2.27436e-34	tr|D8T268|D8T268_SELML	299332-69_5_ORF2	sp|Q93ZG9|FKB53_ARATH	Q93ZG9	FKB53_ARATH	3.49107e-37
Scaffold	28762-471_3_ORF2	377	>sp|Q9LIP2|PSB5B_ARATH_Proteasome_subunit_beta_type-5-B_OS=Arabidopsis_thaliana_GN=PBE2_PE=1_SV=1|||6e-148	28762-471_3_ORF2	31 kDa	1	-1	1	DOC	mapped	D8TEX0	801	D8TEX0_SELML	3.68381e-146	tr|D8TEX0|D8TEX0_SELML	28762-471_3_ORF2	sp|Q9LIP2|PSB5B_ARATH	Q9LIP2	PSB5B_ARATH	6.00517e-145
Scaffold	280641-79_5_ORF2	105	>sp|Q5EF31|PROF_CROSA_Profilin_OS=Crocus_sativus_PE=1_SV=1|||7e-64	280641-79_5_ORF2	17 kDa	1	-1	1	DOC	mapped	D8RML7	802	D8RML7_SELML	2.6291e-55	tr|D8RML7|D8RML7_SELML	280641-79_5_ORF2	sp|Q42449|PROF1_ARATH	Q42449	PROF1_ARATH	8.99177e-57
Scaffold	266991-88_5_ORF2	827	>sp|P17654|AMY1_ORYSJ_Alpha-amylase_OS=Oryza_sativa_subsp._japonica_GN=AMY1.1_PE=2_SV=2|||0	266991-88_5_ORF2	59 kDa	1	-1	1	DOC	mapped	D8SLL1	803	D8SLL1_SELML	0	tr|D8SLL1|D8SLL1_SELML	266991-88_5_ORF2	sp|Q8VZ56|AMY1_ARATH	Q8VZ56	AMY1_ARATH	7.93467e-154
Scaffold	25759-495_3_ORF2	302	>sp|P63546|APT_STRP1_Adenine_phosphoribosyltransferase_OS=Streptococcus_pyogenes_serotype_M1_GN=apt_PE=3_SV=1|||2e-06	25759-495_3_ORF2	28 kDa	1	-1	1	DOC	notMapped		804				25759-495_3_ORF2	noOrthologue	noOrthologue	noOrthologue	notMapped
Scaffold	241614-105_1_ORF2	306	>sp|Q9SJ81|FLA7_ARATH_Fasciclin-like_arabinogalactan_protein_7_OS=Arabidopsis_thaliana_GN=FLA7_PE=1_SV=1|||2e-36	241614-105_1_ORF2	28 kDa	1	-1	1	DOC	mapped	D8SV94	805	D8SV94_SELML	1.50978e-24	tr|D8SV94|D8SV94_SELML	241614-105_1_ORF2	sp|Q9SJ81|FLA7_ARATH	Q9SJ81	FLA7_ARATH	1.45146e-32
Scaffold	239429-107_3_ORF2	675	>sp|A5PKH3|FAAA_BOVIN_Fumarylacetoacetase_OS=Bos_taurus_GN=FAH_PE=2_SV=1|||1e-177	239429-107_3_ORF2	48 kDa	1	-1	1	DOC	mapped	D8RN86	806	D8RN86_SELML	0	tr|D8RN86|D8RN86_SELML	239429-107_3_ORF2	sp|Q8RW90|FAH_ARATH	Q8RW90	FAH_ARATH	0
Scaffold	219704-121_2_ORF1	314	>sp|P22778|ATPO_IPOBA_ATP_synthase_subunit_O,_mitochondrial_OS=Ipomoea_batatas_PE=1_SV=1|||1e-57	219704-121_2_ORF1	29 kDa	1	-1	1	DOC	mapped	D8T4R5	807	D8T4R5_SELML	6.45473e-37	tr|D8T4R5|D8T4R5_SELML	219704-121_2_ORF1	sp|Q96251|ATPO_ARATH	Q96251	ATPO_ARATH	2.45438e-42
Scaffold	21764-535_5_ORF2	137	>sp|P20143|PSAH_HORVU_Photosystem_I_reaction_center_subunit_VI,_chloroplastic_OS=Hordeum_vulgare_GN=PSAH_PE=1_SV=1|||7e-57	21764-535_5_ORF2	19 kDa	1	-1	1	DOC	mapped	D8QU91	808	D8QU91_SELML	1.75259e-41	tr|D8QU91|D8QU91_SELML	21764-535_5_ORF2	sp|Q9SUI6|PSAH2_ARATH	Q9SUI6	PSAH2_ARATH	2.00868e-51
Scaffold	21520-537_5_ORF1	484	>sp|Q9QZC7|PKHB2_MOUSE_Pleckstrin_homology_domain-containing_family_B_member_2_OS=Mus_musculus_GN=Plekhb2_PE=1_SV=1|||2e-06	21520-537_5_ORF1 (+1)	36 kDa	1	-1	1	DOC	mapped	D8S5J3	809	D8S5J3_SELML	6.42239e-18	tr|D8S5J3|D8S5J3_SELML	21520-537_5_ORF1	tr|Q5PNU6|Q5PNU6_ARATH	Q5PNU6	Q5PNU6_ARATH	2.53988e-30
Scaffold	214901-125_1_ORF2	303	Cluster of >sp|P23993|PSAL_HORVU_Photosystem_I_reaction_center_subunit_XI,_chloroplastic_OS=Hordeum_vulgare_GN=PSAL_PE=1_SV=1|||1e-90 (214901-125_1_ORF2)	214901-125_1_ORF2 [5]	28 kDa	1	-1	1	DOC	notMapped		810				214901-125_1_ORF2	sp|Q9SUI4|PSAL_ARATH	Q9SUI4	PSAL_ARATH	9.5047e-83
Scaffold	18361-579_1_ORF2	555	>sp|Q8VYZ3|PME53_ARATH_Probable_pectinesterase_53_OS=Arabidopsis_thaliana_GN=PME53_PE=2_SV=1|||3e-119	18361-579_1_ORF2 (+2)	41 kDa	1	-1	1	DOC	mapped	D8R1X3	811	D8R1X3_SELML	1.97929e-114	tr|D8R1X3|D8R1X3_SELML	18361-579_1_ORF2	sp|Q8VYZ3|PME53_ARATH	Q8VYZ3	PME53_ARATH	3.12975e-116
Scaffold	169706-167_6_ORF2	401	Cluster of no_acceptable_match|||NA (169706-167_6_ORF2)	169706-167_6_ORF2 [12]	33 kDa	1	-1	1	DOC	mapped	D8R3C6	812	D8R3C6_SELML	1.42049e-120	tr|D8R3C6|D8R3C6_SELML	169706-167_6_ORF2	sp|Q93YW5|P2C58_ARATH	Q93YW5	P2C58_ARATH	8.30325e-126
Scaffold	167881-169_4_ORF2	536	>sp|O80796|VIPP1_ARATH_Membrane-associated_protein_VIPP1,_chloroplastic_OS=Arabidopsis_thaliana_GN=VIPP1_PE=1_SV=1|||4e-135	167881-169_4_ORF2 (+2)	40 kDa	1	-1	1	DOC	mapped	D8S5J7	813	D8S5J7_SELML	6.50237e-146	tr|D8S5J7|D8S5J7_SELML	167881-169_4_ORF2	sp|O80796|VIPP1_ARATH	O80796	VIPP1_ARATH	3.54396e-132
Scaffold	166603-171_1_ORF2	962	>sp|P58223|Y4837_ARATH_KH_domain-containing_protein_At4g18375_OS=Arabidopsis_thaliana_GN=At4g18375_PE=2_SV=1|||9e-75	166603-171_1_ORF2	76 kDa	1	-1	1	DOC	mapped	D8R8J7	814	D8R8J7_SELML	5.8647e-117	tr|D8R8J7|D8R8J7_SELML	166603-171_1_ORF2	tr|A0A1P8BBW1|A0A1P8BBW1_ARATH	A0A1P8BBW1	A0A1P8BBW1_ARATH	3.73723e-97
Scaffold	158626-182_3_ORF2	514	no_acceptable_match|||NA	158626-182_3_ORF2 (+3)	39 kDa	1	-1	1	DOC	notMapped		815				158626-182_3_ORF2	tr|Q9FFW8|Q9FFW8_ARATH	Q9FFW8	Q9FFW8_ARATH	0
Scaffold	155571-187_1_ORF2	273	no_acceptable_match|||NA	155571-187_1_ORF2	27 kDa	1	-1	1	DOC	mapped	D8SVN1	816	D8SVN1_SELML	1.28011e-79	tr|D8SVN1|D8SVN1_SELML	155571-187_1_ORF2	tr|C0Z2J1|C0Z2J1_ARATH	C0Z2J1	C0Z2J1_ARATH	4.8166e-78
Scaffold	146816-201_1_ORF2	423	>sp|P83643|UP12_ORYSI_Unknown_protein_DS12_from_2D-PAGE_of_leaf,_chloroplastic_OS=Oryza_sativa_subsp._indica_GN=OsI_027381_PE=1_SV=2|||7e-89	146816-201_1_ORF2	33 kDa	1	-1	1	DOC	mapped	D8RTC8	817	D8RTC8_SELML	4.87617e-100	tr|D8RTC8|D8RTC8_SELML	146816-201_1_ORF2	sp|Q9LZ23|ACR12_ARATH	Q9LZ23	ACR12_ARATH	3.28933e-110
Scaffold	143620-204_4_ORF1	237	>sp|Q8LBK6|GRS15_ARATH_Monothiol_glutaredoxin-S15,_mitochondrial_OS=Arabidopsis_thaliana_GN=GRXS15_PE=1_SV=2|||1e-57	143620-204_4_ORF1 (+1)	25 kDa	1	-1	1	DOC	mapped	D8R9D3	818	D8R9D3_SELML	6.87863e-56	tr|D8R9D3|D8R9D3_SELML	143620-204_4_ORF1	sp|Q8LBK6|GRS15_ARATH	Q8LBK6	GRS15_ARATH	4.52123e-54
Scaffold	14312-639_6_ORF2	848	>sp|P0CP47|PABP_CRYNB_Polyadenylate-binding_protein,_cytoplasmic_and_nuclear_OS=Cryptococcus_neoformans_var._neoformans_serotype_D_(strain_B-3501A)_GN=PAB1_PE=3_SV=1|||2e-06	14312-639_6_ORF2	60 kDa	1	-1	1	DOC	mapped	D8SMU6	819	D8SMU6_SELML	7.54288e-32	tr|D8SMU6|D8SMU6_SELML	14312-639_6_ORF2	tr|A0A1I9LLU3|A0A1I9LLU3_ARATH	A0A1I9LLU3	A0A1I9LLU3_ARATH	1.52768e-14
Scaffold	128797-216_2_ORF2	396	>sp|Q9ZVL6|U603_ARATH_UPF0603_protein_At1g54780,_chloroplastic_OS=Arabidopsis_thaliana_GN=At1g54780_PE=1_SV=1|||4e-115	128797-216_2_ORF2	32 kDa	1	-1	1	DOC	mapped	D8T707	820	D8T707_SELML	1.70355e-111	tr|D8T707|D8T707_SELML	128797-216_2_ORF2	sp|Q9ZVL6|U603_ARATH	Q9ZVL6	U603_ARATH	4.75948e-112
Scaffold	109758-237_3_ORF2	1051	Cluster of >sp|Q42560|ACO1_ARATH_Aconitate_hydratase_1_OS=Arabidopsis_thaliana_GN=ACO1_PE=1_SV=2|||0 (109758-237_3_ORF2)	109758-237_3_ORF2 [12]	105 kDa	1	-1	1	DOC	mapped	D8T7Z2	821	D8T7Z2_SELML	0	tr|D8T7Z2|D8T7Z2_SELML	109758-237_3_ORF2	sp|Q9SIB9|ACO3M_ARATH	Q9SIB9	ACO3M_ARATH	0
Scaffold	266801-88_2_ORF2	512	>sp|Q8SVY9|Y3G1_ENCCU_Uncharacterized_protein_ECU03_1610_OS=Encephalitozoon_cuniculi_(strain_GB-M1)_GN=ECU03_1610_PE=1_SV=1|||1e-12	266801-88_2_ORF2 (+1)	39 kDa	1	-1.03	1	DOC	notMapped		822				266801-88_2_ORF2	noOrthologue	noOrthologue	noOrthologue	notMapped
Scaffold	415079-17_4_ORF2	184	>sp|Q09730|SFT1_SCHPO_Protein_transport_protein_sft1_OS=Schizosaccharomyces_pombe_(strain_972_/_ATCC_24843)_GN=sft1_PE=2_SV=1|||2e-08	415079-17_4_ORF2 (+1)	22 kDa	1	-1.07	1	DOC	mapped	D8RHB7	823	D8RHB7_SELML	6.97922e-18	tr|D8RHB7|D8RHB7_SELML	415079-17_4_ORF2	tr|Q9SUB2|Q9SUB2_ARATH	Q9SUB2	Q9SUB2_ARATH	0.000692152
Scaffold	tr|B8LLJ4|B8LLJ4_PICSI	769	Cluster of Dihydrolipoyl dehydrogenase OS=Picea sitchensis PE=2 SV=1 (tr|B8LLJ4|B8LLJ4_PICSI)	tr|B8LLJ4|B8LLJ4_PICSI [5]	54 kDa	1	-1.09	1	DOC	mapped	D8TCV6	824	D8TCV6_SELML	0	tr|D8TCV6|D8TCV6_SELML	tr|B8LLJ4|B8LLJ4_PICSI	sp|Q9M5K3|DLDH1_ARATH	Q9M5K3	DLDH1_ARATH	0
Scaffold	21067-543_5_ORF2	285	Cluster of >sp|P81760|TL17_ARATH_Thylakoid_lumenal_17.4_kDa_protein,_chloroplastic_OS=Arabidopsis_thaliana_GN=At5g53490_PE=1_SV=2|||4e-88 (21067-543_5_ORF2)	21067-543_5_ORF2 [2]	27 kDa	1	-1.12	1	DOC	mapped	D8T7R2	825	D8T7R2_SELML	6.27495e-81	tr|D8T7R2|D8T7R2_SELML	21067-543_5_ORF2	sp|P81760|TL17_ARATH	P81760	TL17_ARATH	7.92721e-85
Scaffold	66706-309_6_ORF2	296	>sp|Q94EG6|Y5224_ARATH_Uncharacterized_protein_At5g02240_OS=Arabidopsis_thaliana_GN=At5g02240_PE=1_SV=1|||7e-138	66706-309_6_ORF2	28 kDa	1	-1.13	1	DOC	mapped	D8RV60	826	D8RV60_SELML	2.19865e-133	tr|D8RV60|D8RV60_SELML	66706-309_6_ORF2	sp|Q94EG6|Y5224_ARATH	Q94EG6	Y5224_ARATH	7.76677e-135
Scaffold	326789-54_1_ORF1	507	Cluster of >sp|O81155|CYSKP_SOLTU_Cysteine_synthase,_chloroplastic/chromoplastic_OS=Solanum_tuberosum_PE=2_SV=1|||0 (326789-54_1_ORF1)	326789-54_1_ORF1 [4]	39 kDa	1	-1.13	1	DOC	mapped	D8RT31	827	D8RT31_SELML	1.92352e-180	tr|D8RT31|D8RT31_SELML	326789-54_1_ORF1	sp|P47999|CYSKP_ARATH	P47999	CYSKP_ARATH	1.43611e-177
Scaffold	ZZ_FGCZCont0241	709	Cluster of sp|K1H7_HUMAN| (ZZ_FGCZCont0241)	ZZ_FGCZCont0241 [18]	50 kDa	1	-1.15	1	DOC	notMapped		828				ZZ_FGCZCont0241	tr|Q8H0S3|Q8H0S3_ARATH	Q8H0S3	Q8H0S3_ARATH	0
Scaffold	43963-384_3_ORF2	376	Cluster of >sp|P09444|LEA34_GOSHI_Late_embryogenesis_abundant_protein_D-34_OS=Gossypium_hirsutum_PE=4_SV=1|||2e-37 (43963-384_3_ORF2)	43963-384_3_ORF2 [2]	31 kDa	1	-1.15	1	DOC	mapped	D8RK55	829	D8RK55_SELML	2.62993e-53	tr|D8RK55|D8RK55_SELML	43963-384_3_ORF2	sp|Q9LJ97|LEA31_ARATH	Q9LJ97	LEA31_ARATH	4.74152e-40
Scaffold	77575-286_6_ORF2	571	>sp|C6TBN2|AKR1_SOYBN_Probable_aldo-keto_reductase_1_OS=Glycine_max_GN=AKR1_PE=2_SV=1|||7e-159	77575-286_6_ORF2 (+1)	42 kDa	1	-1.17	1	DOC	mapped	D8RU64	830	D8RU64_SELML	1.67934e-168	tr|D8RU64|D8RU64_SELML	77575-286_6_ORF2	sp|Q93ZN2|ALKR4_ARATH	Q93ZN2	ALKR4_ARATH	1.59564e-141
Scaffold	70022-302_6_ORF1	70	>sp|P34893|CH10_ARATH_10_kDa_chaperonin_OS=Arabidopsis_thaliana_GN=CPN10_PE=2_SV=1|||9e-44	70022-302_6_ORF1	15 kDa	1	-1.17	1	DOC	mapped	D8RD27	831	D8RD27_SELML	8.63474e-32	tr|D8RD27|D8RD27_SELML	70022-302_6_ORF1	sp|P34893|CH10_ARATH	P34893	CH10_ARATH	8.66022e-40
Scaffold	1707-1474_6_ORF2	548	Cluster of >sp|Q945K7|IDH5_ARATH_Isocitrate_dehydrogenase_[NAD]_catalytic_subunit_5,_mitochondrial_OS=Arabidopsis_thaliana_GN=IDH5_PE=1_SV=1|||0 (1707-1474_6_ORF2)	1707-1474_6_ORF2 [2]	41 kDa	1	-1.17	1	DOC	mapped	D8T1A5	832	D8T1A5_SELML	0	tr|D8T1A5|D8T1A5_SELML	1707-1474_6_ORF2	sp|Q945K7|IDH5_ARATH	Q945K7	IDH5_ARATH	0
Scaffold	165243-173_3_ORF2	880	>sp|P48644|AL1A1_BOVIN_Retinal_dehydrogenase_1_OS=Bos_taurus_GN=ALDH1A1_PE=2_SV=3|||0	165243-173_3_ORF2	64 kDa	1	-1.19	1	DOC	mapped	D8RHL6	833	D8RHL6_SELML	0	tr|D8RHL6|D8RHL6_SELML	165243-173_3_ORF2	sp|Q8S528|AL2B7_ARATH	Q8S528	AL2B7_ARATH	0
Scaffold	14473-637_3_ORF2	386	>sp|Q9C8S6|Y1322_ARATH_C2_domain-containing_protein_At1g63220_OS=Arabidopsis_thaliana_GN=At1g63220_PE=1_SV=1|||1e-29	14473-637_3_ORF2	32 kDa	1	-1.19	1	DOC	mapped	D8RPH2	834	D8RPH2_SELML	6.08189e-27	tr|D8RPH2|D8RPH2_SELML	14473-637_3_ORF2	sp|Q9C8S6|PP16B_ARATH	Q9C8S6	PP16B_ARATH	2.47228e-25
Scaffold	135093-211_1_ORF2	694	Cluster of >sp|Q9C9C4|ENO1_ARATH_Enolase_1,_chloroplastic_OS=Arabidopsis_thaliana_GN=ENO1_PE=1_SV=1|||0 (135093-211_1_ORF2)	135093-211_1_ORF2 [4]	49 kDa	1	-1.21	1	DOC	mapped	D8SMH9	835	D8SMH9_SELML	0	tr|D8SMH9|D8SMH9_SELML	135093-211_1_ORF2	sp|P25696|ENO2_ARATH	P25696	ENO2_ARATH	0
Scaffold	tr|F2DM28|F2DM28_HORVD	511	Predicted protein OS=Hordeum vulgare var. distichum PE=2 SV=1	tr|F2DM28|F2DM28_HORVD	39 kDa	1	-1.22	1	DOC	mapped	D8QQN0	836	D8QQN0_SELML	1.09096e-176	tr|D8QQN0|D8QQN0_SELML	tr|F2DM28|F2DM28_HORVD	sp|Q8W593|LGUC_ARATH	Q8W593	LGUC_ARATH	0
Scaffold	tr|A9SGH8|A9SGH8_PHYPA	809	Cluster of Glucose-1-phosphate adenylyltransferase OS=Physcomitrella patens subsp. patens GN=PHYPADRAFT_184719 PE=3 SV=1 (tr|A9SGH8|A9SGH8_PHYPA)	tr|A9SGH8|A9SGH8_PHYPA [2]	57 kDa	1	-1.22	1	DOC	mapped	D8SER8	837	D8SER8_SELML	0	tr|D8SER8|D8SER8_SELML	tr|A9SGH8|A9SGH8_PHYPA	sp|P55228|GLGS_ARATH	P55228	GLGS_ARATH	0
Scaffold	53145-348_1_ORF2	333	no_acceptable_match|||NA	53145-348_1_ORF2	30 kDa	1	-1.22	1	DOC	mapped	D8S9D6	838	D8S9D6_SELML	1.16135e-141	tr|D8S9D6|D8S9D6_SELML	53145-348_1_ORF2	sp|Q9XF89|CB5_ARATH	Q9XF89	CB5_ARATH	9.48599e-122
Scaffold	3334-1166_2_ORF2	543	>sp|Q40784|AAPC_CENCI_Putative_glucose-6-phosphate_1-epimerase_OS=Cenchrus_ciliaris_PE=2_SV=1|||3e-45	3334-1166_2_ORF2	40 kDa	1	-1.22	1	DOC	mapped	D8SVX7	839	D8SVX7_SELML	3.91352e-48	tr|D8SVX7|D8SVX7_SELML	3334-1166_2_ORF2	tr|Q9FJY6|Q9FJY6_ARATH	Q9FJY6	Q9FJY6_ARATH	1.08262e-132
Scaffold	313076-61_2_ORF2	272	>sp|Q9ZT66|E134_MAIZE_Endo-1,3;1,4-beta-D-glucanase_OS=Zea_mays_PE=1_SV=1|||1e-42	313076-61_2_ORF2	26 kDa	1	-1.22	1	DOC	mapped	D8RS36	840	D8RS36_SELML	1.26669e-83	tr|D8RS36|D8RS36_SELML	313076-61_2_ORF2	tr|Q9LUG8|Q9LUG8_ARATH	Q9LUG8	Q9LUG8_ARATH	1.46099e-78
Scaffold	247171-101_4_ORF2	846	>sp|Q339X2|BGL34_ORYSJ_Beta-glucosidase_34_OS=Oryza_sativa_subsp._japonica_GN=BGLU34_PE=2_SV=1|||4e-138	247171-101_4_ORF2	60 kDa	1	-1.26	1	DOC	mapped	D8S8X6	841	D8S8X6_SELML	4.08775e-131	tr|D8S8X6|D8S8X6_SELML	247171-101_4_ORF2	sp|Q9FZE0|BGL40_ARATH	Q9FZE0	BGL40_ARATH	9.68753e-132
Scaffold	tr|D8QZE8|D8QZE8_SELML	578	Putative uncharacterized protein OS=Selaginella moellendorffii GN=SELMODRAFT_142334 PE=4 SV=1	tr|D8QZE8|D8QZE8_SELML (+1)	42 kDa	1	-1.32	1	DOC	mapped	D8QZE8	842	D8QZE8_SELML	0	tr|D8QZE8|D8QZE8_SELML	tr|D8QZE8|D8QZE8_SELML	tr|F4I2F8|F4I2F8_ARATH	F4I2F8	F4I2F8_ARATH	0
Scaffold	tr|C1E7M1|C1E7M1_MICSR	1048	Cluster of Oxoglutarate dehydrogenase, E1 component OS=Micromonas sp. (strain RCC299 / NOUM17) GN=OGDH PE=4 SV=1 (tr|C1E7M1|C1E7M1_MICSR)	tr|C1E7M1|C1E7M1_MICSR [2]	104 kDa	1	-1.32	1	DOC	mapped	D8S4X1	843	D8S4X1_SELML	0	tr|D8S4X1|D8S4X1_SELML	tr|C1E7M1|C1E7M1_MICSR	tr|F4IWV2|F4IWV2_ARATH	F4IWV2	F4IWV2_ARATH	0
Scaffold	97985-252_1_ORF2	480	Cluster of >sp|Q9SV68|QORH_ARATH_Putative_quinone-oxidoreductase_homolog,_chloroplastic_OS=Arabidopsis_thaliana_GN=At4g13010_PE=2_SV=1|||4e-152 (97985-252_1_ORF2)	97985-252_1_ORF2 [11]	36 kDa	1	-1.32	1	DOC	mapped	D8RX79	844	D8RX79_SELML	2.78939e-150	tr|D8RX79|D8RX79_SELML	97985-252_1_ORF2	sp|Q9SV68|QORH_ARATH	Q9SV68	QORH_ARATH	3.3744e-149
Scaffold	89422-265_5_ORF2	796	Cluster of >sp|P09790|IGA_NEIGO_IgA-specific_serine_endopeptidase_autotransporter_OS=Neisseria_gonorrhoeae_GN=iga_PE=1_SV=1|||7e-06 (89422-265_5_ORF2)	89422-265_5_ORF2 [2]	56 kDa	1	-1.32	1	DOC	notMapped		845				89422-265_5_ORF2	tr|F4IBV6|F4IBV6_ARATH	F4IBV6	F4IBV6_ARATH	5.43449e-13
Scaffold	76935-288_1_ORF1	547	>sp|O94432|YHKF_SCHPO_Uncharacterized_RNA-binding_protein_C660.15_OS=Schizosaccharomyces_pombe_(strain_972_/_ATCC_24843)_GN=SPBC660.15_PE=2_SV=1|||1e-27	76935-288_1_ORF1	41 kDa	1	-1.32	1	DOC	mapped	D8QPR6	846	D8QPR6_SELML	1.79907e-71	tr|D8QPR6|D8QPR6_SELML	76935-288_1_ORF1	sp|Q9LKA4|UBA2C_ARATH	Q9LKA4	UBA2C_ARATH	1.96938e-58
Scaffold	71037-299_5_ORF2	873	>sp|Q5R9H4|A1CF_PONAB_APOBEC1_complementation_factor_OS=Pongo_abelii_GN=A1CF_PE=2_SV=1|||3e-43	71037-299_5_ORF2	63 kDa	1	-1.32	1	DOC	mapped	D8RBK0	847	D8RBK0_SELML	8.81602e-46	tr|D8RBK0|D8RBK0_SELML	71037-299_5_ORF2	sp|Q9ASP6|HNRPQ_ARATH	Q9ASP6	HNRPQ_ARATH	1.00527e-36
Scaffold	70975-299_4_ORF2	583	>sp|P81600|ADHH_GADMO_Alcohol_dehydrogenase_class-3_chain_H_OS=Gadus_morhua_PE=1_SV=1|||0	70975-299_4_ORF2	42 kDa	1	-1.32	1	DOC	mapped	D8RRY0	848	D8RRY0_SELML	0	tr|D8RRY0|D8RRY0_SELML	70975-299_4_ORF2	sp|Q96533|ADHX_ARATH	Q96533	ADHX_ARATH	0
Scaffold	64641-315_3_ORF2	956	>sp|Q39102|FTSH1_ARATH_ATP-dependent_zinc_metalloprotease_FTSH_1,_chloroplastic_OS=Arabidopsis_thaliana_GN=FTSH1_PE=1_SV=2|||0	64641-315_3_ORF2	75 kDa	1	-1.32	1	DOC	mapped	D8SNM1	849	D8SNM1_SELML	0	tr|D8SNM1|D8SNM1_SELML	64641-315_3_ORF2	tr|A0A1P8AXC1|A0A1P8AXC1_ARATH	A0A1P8AXC1	A0A1P8AXC1_ARATH	0
Scaffold	61617-322_4_ORF2	245	>sp|Q04432|HSP31_YEAST_Probable_chaperone_protein_HSP31_OS=Saccharomyces_cerevisiae_(strain_ATCC_204508_/_S288c)_GN=HSP31_PE=1_SV=1|||6e-29	61617-322_4_ORF2	25 kDa	1	-1.32	1	DOC	mapped	D8SW04	850	D8SW04_SELML	2.47166e-101	tr|D8SW04|D8SW04_SELML	61617-322_4_ORF2	sp|Q9M8R4|DJ1D_ARATH	Q9M8R4	DJ1D_ARATH	7.73084e-07
Scaffold	51291-355_5_ORF1	708	>sp|A6T923|HPXO_KLEP7_FAD-dependent_urate_hydroxylase_OS=Klebsiella_pneumoniae_subsp._pneumoniae_(strain_ATCC_700721_/_MGH_78578)_GN=hpxO_PE=1_SV=1|||2e-31	51291-355_5_ORF1	50 kDa	1	-1.32	1	DOC	mapped	D8RZI6	851	D8RZI6_SELML	3.26233e-93	tr|D8RZI6|D8RZI6_SELML	51291-355_5_ORF1	tr|Q9ZQN9|Q9ZQN9_ARATH	Q9ZQN9	Q9ZQN9_ARATH	2.18676e-108
Scaffold	5-9806_3_ORF2	982	>sp|Q3V534|PSAA_ACOCL_Photosystem_I_P700_chlorophyll_a_apoprotein_A1_OS=Acorus_calamus_GN=psaA_PE=3_SV=1|||0	5-9806_3_ORF2	83 kDa	1	-1.32	1	DOC	mapped	C7B2K5	852	C7B2K5_SELML	0	tr|C7B2K5|C7B2K5_SELML	5-9806_3_ORF2	sp|P56767|PSAB_ARATH	P56767	PSAB_ARATH	0
Scaffold	46601-373_3_ORF2	977	>sp|Q9ZPI6|AIM1_ARATH_Peroxisomal_fatty_acid_beta-oxidation_multifunctional_protein_AIM1_OS=Arabidopsis_thaliana_GN=AIM1_PE=1_SV=1|||0	46601-373_3_ORF2	80 kDa	1	-1.32	1	DOC	mapped	D8S3X4	853	D8S3X4_SELML	0	tr|D8S3X4|D8S3X4_SELML	46601-373_3_ORF2	sp|Q9ZPI5|MFP2_ARATH	Q9ZPI5	MFP2_ARATH	0
Scaffold	360470-39_5_ORF2	474	no_acceptable_match|||NA	360470-39_5_ORF2	36 kDa	1	-1.32	1	DOC	mapped	D8SYB1	854	D8SYB1_SELML	0	tr|D8SYB1|D8SYB1_SELML	360470-39_5_ORF2	tr|F4II66|F4II66_ARATH	F4II66	F4II66_ARATH	0
Scaffold	351611-43_3_ORF1	641	>sp|Q9LZX4|FLA10_ARATH_Fasciclin-like_arabinogalactan_protein_10_OS=Arabidopsis_thaliana_GN=FLA10_PE=1_SV=1|||9e-54	351611-43_3_ORF1	46 kDa	1	-1.32	1	DOC	mapped	D8SV94	855	D8SV94_SELML	9.97017e-57	tr|D8SV94|D8SV94_SELML	351611-43_3_ORF1	sp|Q9LZX4|FLA10_ARATH	Q9LZX4	FLA10_ARATH	3.99067e-50
Scaffold	2829-1241_4_ORF1	753	Cluster of >sp|Q9ZQI7|ALD1_ARATH_Aminotransferase_ALD1_OS=Arabidopsis_thaliana_GN=ALD1_PE=2_SV=2|||0 (2829-1241_4_ORF1)	2829-1241_4_ORF1 [7]	52 kDa	1	-1.32	1	DOC	mapped	D8S6V4	856	D8S6V4_SELML	0	tr|D8S6V4|D8S6V4_SELML	2829-1241_4_ORF1	sp|Q93ZN9|DAPAT_ARATH	Q93ZN9	DAPAT_ARATH	0
Scaffold	273590-84_6_ORF1	1080	>sp|Q5T9S5|CCD18_HUMAN_Coiled-coil_domain-containing_protein_18_OS=Homo_sapiens_GN=CCDC18_PE=1_SV=1|||3e-10	273590-84_6_ORF1	123 kDa	1	-1.32	1	DOC	mapped	D8STM0	857	D8STM0_SELML	3.43294e-08	tr|D8STM0|D8STM0_SELML	273590-84_6_ORF1	tr|F4ISU2|F4ISU2_ARATH	F4ISU2	F4ISU2_ARATH	5.92276e-11
Scaffold	196139-141_5_ORF2	335	>sp|Q08632|SDR1_PICAB_Short-chain_type_dehydrogenase/reductase_OS=Picea_abies_PE=2_SV=1|||3e-92	196139-141_5_ORF2	30 kDa	1	-1.32	1	DOC	mapped	D8R3H9	858	D8R3H9_SELML	7.07631e-93	tr|D8R3H9|D8R3H9_SELML	196139-141_5_ORF2	tr|Q9SVQ9|Q9SVQ9_ARATH	Q9SVQ9	Q9SVQ9_ARATH	1.3215e-89
Scaffold	18818-572_2_ORF2	76	>sp|P49690|RL23_ARATH_60S_ribosomal_protein_L23_OS=Arabidopsis_thaliana_GN=RPL23A_PE=2_SV=3|||6e-100	18818-572_2_ORF2 (+3)	16 kDa	1	-1.32	1	DOC	mapped	D8QW43	859	D8QW43_SELML	3.24967e-95	tr|D8QW43|D8QW43_SELML	18818-572_2_ORF2	sp|P49690|RL23_ARATH	P49690	RL23_ARATH	1.51032e-96
Scaffold	179260-157_5_ORF1	881	Cluster of >sp|Q9S7B5|THRC1_ARATH_Threonine_synthase_1,_chloroplastic_OS=Arabidopsis_thaliana_GN=TS1_PE=1_SV=1|||0 (179260-157_5_ORF1)	179260-157_5_ORF1 [3]	64 kDa	1	-1.32	1	DOC	notMapped		860				179260-157_5_ORF1	tr|A0A1P8BDK6|A0A1P8BDK6_ARATH	A0A1P8BDK6	A0A1P8BDK6_ARATH	2.63111e-133
Scaffold	142454-204_3_ORF2	932	>sp|Q00624|ASOL_BRANA_L-ascorbate_oxidase_homolog_OS=Brassica_napus_GN=Bp10_PE=2_SV=1|||0	142454-204_3_ORF2	70 kDa	1	-1.32	1	DOC	mapped	D8SD87	861	D8SD87_SELML	0	tr|D8SD87|D8SD87_SELML	142454-204_3_ORF2	tr|Q9SGR6|Q9SGR6_ARATH	Q9SGR6	Q9SGR6_ARATH	0
Scaffold	ZZ_FGCZCont0099	859	sp|K1C9_HUMAN|	ZZ_FGCZCont0099 (+1)	62 kDa	1	-1.34	1	DOC	notMapped		862				ZZ_FGCZCont0099	tr|Q8H0S3|Q8H0S3_ARATH	Q8H0S3	Q8H0S3_ARATH	0
Scaffold	139225-207_3_ORF1	764	Cluster of >sp|P57751|UGPA1_ARATH_UTP--glucose-1-phosphate_uridylyltransferase_1_OS=Arabidopsis_thaliana_GN=At5g17310_PE=2_SV=1|||0 (139225-207_3_ORF1)	139225-207_3_ORF1 [3]	53 kDa	1	-1.36	1	DOC	mapped	D8RTW0	863	D8RTW0_SELML	0	tr|D8RTW0|D8RTW0_SELML	139225-207_3_ORF1	sp|P57751|UGPA1_ARATH	P57751	UGPA1_ARATH	0
Scaffold	ZZ_FGCZCont0098	191	sp|PRDX1_HUMAN|	ZZ_FGCZCont0098 (+1)	22 kDa	1	-1.38	1	DOC	mapped	D8T121	864	D8T121_SELML	4.91631e-78	tr|D8T121|D8T121_SELML	ZZ_FGCZCont0098	tr|Q8H0S3|Q8H0S3_ARATH	Q8H0S3	Q8H0S3_ARATH	0
Scaffold	253420-97_1_ORF2	623	>sp|O82660|P2SAF_ARATH_Photosystem_II_stability/assembly_factor_HCF136,_chloroplastic_OS=Arabidopsis_thaliana_GN=HCF136_PE=1_SV=1|||0	253420-97_1_ORF2	45 kDa	1	-1.39	1	DOC	mapped	D8SFG9	865	D8SFG9_SELML	0	tr|D8SFG9|D8SFG9_SELML	253420-97_1_ORF2	tr|A0A1P8BG37|A0A1P8BG37_ARATH	A0A1P8BG37	A0A1P8BG37_ARATH	0
Scaffold	tr|F6GXV0|F6GXV0_VITVI	102	Putative uncharacterized protein OS=Vitis vinifera GN=VIT_08s0058g00210 PE=3 SV=1	tr|F6GXV0|F6GXV0_VITVI	17 kDa	1	-1.42	1	DOC	mapped	D8QTR5	866	D8QTR5_SELML	2.49916e-29	tr|D8QTR5|D8QTR5_SELML	tr|F6GXV0|F6GXV0_VITVI	sp|P13853|HS17C_ARATH	P13853	HS17C_ARATH	4.94275e-67
Scaffold	395259-24_4_ORF2	754	>sp|P52416|GLGS1_VICFA_Glucose-1-phosphate_adenylyltransferase_small_subunit_1,_chloroplastic_OS=Vicia_faba_GN=AGPC_PE=2_SV=1|||0	395259-24_4_ORF2	52 kDa	1	-1.42	1	DOC	mapped	D8SER8	867	D8SER8_SELML	0	tr|D8SER8|D8SER8_SELML	395259-24_4_ORF2	sp|P55228|GLGS_ARATH	P55228	GLGS_ARATH	0
Scaffold	211987-127_5_ORF2	845	>sp|Q27487|CATA1_CAEEL_Peroxisomal_catalase_1_OS=Caenorhabditis_elegans_GN=ctl-2_PE=2_SV=3|||0	211987-127_5_ORF2 (+8)	60 kDa	1	-1.42	1	DOC	mapped	D8S1Z6	868	D8S1Z6_SELML	0	tr|D8S1Z6|D8S1Z6_SELML	211987-127_5_ORF2	sp|Q96528|CATA1_ARATH	Q96528	CATA1_ARATH	5.89125e-134
Scaffold	206587-132_3_ORF2	176	>sp|Q9XGS0|TRXM_BRANA_Thioredoxin_M-type,_chloroplastic_OS=Brassica_napus_PE=1_SV=1|||3e-57	206587-132_3_ORF2	22 kDa	1	-1.42	1	DOC	mapped	D8R2K2	869	D8R2K2_SELML	2.3403e-53	tr|D8R2K2|D8R2K2_SELML	206587-132_3_ORF2	sp|O48737|TRXM1_ARATH	O48737	TRXM1_ARATH	3.4897e-52
Scaffold	193016-144_1_ORF2	322	>sp|Q9SHE8|PSAF_ARATH_Photosystem_I_reaction_center_subunit_III,_chloroplastic_OS=Arabidopsis_thaliana_GN=PSAF_PE=1_SV=1|||2e-94	193016-144_1_ORF2	29 kDa	1	-1.42	1	DOC	mapped	D8QPQ3	870	D8QPQ3_SELML	1.92914e-97	tr|D8QPQ3|D8QPQ3_SELML	193016-144_1_ORF2	sp|Q9SHE8|PSAF_ARATH	Q9SHE8	PSAF_ARATH	3.34078e-91
Scaffold	149426-198_2_ORF2	895	>sp|Q8VXX5|SKS1_ARATH_Monocopper_oxidase-like_protein_SKS1_OS=Arabidopsis_thaliana_GN=SKS1_PE=1_SV=1|||0	149426-198_2_ORF2	65 kDa	1	-1.42	1	DOC	mapped	D8QML5	871	D8QML5_SELML	0	tr|D8QML5|D8QML5_SELML	149426-198_2_ORF2	sp|Q9SU40|SKU5_ARATH	Q9SU40	SKU5_ARATH	0
Scaffold	1458-1538_6_ORF2	234	>sp|Q7F8S5|PR2E2_ORYSJ_Peroxiredoxin-2E-2,_chloroplastic_OS=Oryza_sativa_subsp._japonica_GN=PRXIIE-2_PE=1_SV=1|||5e-88	1458-1538_6_ORF2	24 kDa	1	-1.42	1	DOC	mapped	D8R098	872	D8R098_SELML	5.53503e-81	tr|D8R098|D8R098_SELML	1458-1538_6_ORF2	sp|Q949U7|PRX2E_ARATH	Q949U7	PRX2E_ARATH	4.13707e-82
Scaffold	158858-182_4_ORF2	96	>sp|P34091|RL6_MESCR_60S_ribosomal_protein_L6_OS=Mesembryanthemum_crystallinum_GN=RPL6_PE=2_SV=1|||1e-32	158858-182_4_ORF2	17 kDa	1	-1.46	1	DOC	notMapped		873				158858-182_4_ORF2	sp|Q9C9C5|RL63_ARATH	Q9C9C5	RL63_ARATH	5.23042e-26
Scaffold	ZZ_FGCZCont0025	905	Cluster of gi|1346343|sp|P04264| K2C1_HUMAN KERATIN, TYPE II CYTOSKELETAL 1 (CYTO (ZZ_FGCZCont0025)	ZZ_FGCZCont0025 [6]	66 kDa	1	-1.48	1	DOC	notMapped		874				ZZ_FGCZCont0025	tr|Q8H0S3|Q8H0S3_ARATH	Q8H0S3	Q8H0S3_ARATH	0
Scaffold	253001-98_1_ORF1	61	>sp|P20075|LEAD8_DAUCA_Embryonic_protein_DC-8_OS=Daucus_carota_PE=3_SV=1|||1e-12	253001-98_1_ORF1	14 kDa	1	-1.55	1	DOC	mapped	D8RYZ2	875	D8RYZ2_SELML	4.16731e-08	tr|D8RYZ2|D8RYZ2_SELML	253001-98_1_ORF1	sp|Q9SKP0|ECP63_ARATH	Q9SKP0	ECP63_ARATH	1.43925e-11
Scaffold	ZZ_FGCZCont0179	233	sp|TRYP_PIG|	ZZ_FGCZCont0179 (+1)	24 kDa	1	-1.57	1	DOC	notMapped		876				ZZ_FGCZCont0179	tr|Q8H0S3|Q8H0S3_ARATH	Q8H0S3	Q8H0S3_ARATH	0
Scaffold	ZZ_FGCZCont0250	26	sp|THIO_HUMAN|	ZZ_FGCZCont0250 (+1)	12 kDa		-1.58			mapped	D8SI82	877	D8SI82_SELML	8.42999e-29	tr|D8SI82|D8SI82_SELML	ZZ_FGCZCont0250	tr|Q8H0S3|Q8H0S3_ARATH	Q8H0S3	Q8H0S3_ARATH	0
Scaffold	tr|Q7XAJ0|Q7XAJ0_9POAL	44	High-molecular-weight glutenin subunit (Fragment) OS=Triticum spelta GN=Glu-B1-1 PE=4 SV=1	tr|Q7XAJ0|Q7XAJ0_9POAL	13 kDa		-1.58			notMapped		878				tr|Q7XAJ0|Q7XAJ0_9POAL	noOrthologue	noOrthologue	noOrthologue	notMapped
Scaffold	tr|Q7X9M4|Q7X9M4_WHEAT	243	Putative uncharacterized protein (Fragment) OS=Triticum aestivum PE=2 SV=1	tr|Q7X9M4|Q7X9M4_WHEAT	25 kDa		-1.58			notMapped		879				tr|Q7X9M4|Q7X9M4_WHEAT	noOrthologue	noOrthologue	noOrthologue	notMapped
Scaffold	tr|G7KYY7|G7KYY7_MEDTR	976	Heat shock protein OS=Medicago truncatula GN=MTR_7g025620 PE=3 SV=1	tr|G7KYY7|G7KYY7_MEDTR	80 kDa		-1.58			mapped	D8RBE2	880	D8RBE2_SELML	0	tr|D8RBE2|D8RBE2_SELML	tr|G7KYY7|G7KYY7_MEDTR	sp|Q9LHA8|MD37C_ARATH	Q9LHA8	MD37C_ARATH	0
Scaffold	tr|F2E3B2|F2E3B2_HORVD	1046	Predicted protein OS=Hordeum vulgare var. distichum PE=2 SV=1	tr|F2E3B2|F2E3B2_HORVD	103 kDa		-1.58			notMapped		881				tr|F2E3B2|F2E3B2_HORVD	sp|Q9FPT1|UBP12_ARATH	Q9FPT1	UBP12_ARATH	0
Scaffold	tr|F2DTL3|F2DTL3_HORVD	160	Predicted protein OS=Hordeum vulgare var. distichum PE=2 SV=1	tr|F2DTL3|F2DTL3_HORVD	21 kDa		-1.58			notMapped		882				tr|F2DTL3|F2DTL3_HORVD	sp|P53496|ACT11_ARATH	P53496	ACT11_ARATH	0
Scaffold	tr|E1ZQD0|E1ZQD0_CHLVA	1097	Putative uncharacterized protein OS=Chlorella variabilis GN=CHLNCDRAFT_59065 PE=4 SV=1	tr|E1ZQD0|E1ZQD0_CHLVA	150 kDa		-1.58			notMapped		883				tr|E1ZQD0|E1ZQD0_CHLVA	sp|Q9LYN8|EMS1_ARATH	Q9LYN8	EMS1_ARATH	3.06586e-62
Scaffold	tr|D8RFE7|D8RFE7_SELML	263	Putative uncharacterized protein OS=Selaginella moellendorffii GN=SELMODRAFT_270805 PE=3 SV=1	tr|D8RFE7|D8RFE7_SELML (+1)	26 kDa		-1.58			mapped	D8RFE7	884	D8RFE7_SELML	1.09456e-167	tr|D8RFE7|D8RFE7_SELML	tr|D8RFE7|D8RFE7_SELML	sp|Q39258|VATE1_ARATH	Q39258	VATE1_ARATH	3.01333e-104
Scaffold	tr|D8R8N0|D8R8N0_SELML	1093	Putative uncharacterized protein OS=Selaginella moellendorffii GN=SELMODRAFT_169086 PE=3 SV=1	tr|D8R8N0|D8R8N0_SELML	143 kDa		-1.58			mapped	D8R8N0	885	D8R8N0_SELML	0	tr|D8R8N0|D8R8N0_SELML	tr|D8R8N0|D8R8N0_SELML	sp|Q7GB25|AB5C_ARATH	Q7GB25	AB5C_ARATH	0
Scaffold	tr|D8QZD1|D8QZD1_SELML	662	Putative uncharacterized protein OS=Selaginella moellendorffii GN=SELMODRAFT_82070 PE=3 SV=1	tr|D8QZD1|D8QZD1_SELML (+1)	47 kDa		-1.58			mapped	D8QZD1	886	D8QZD1_SELML	0	tr|D8QZD1|D8QZD1_SELML	tr|D8QZD1|D8QZD1_SELML	sp|Q9SZX3|ASSY_ARATH	Q9SZX3	ASSY_ARATH	0
Scaffold	tr|D8KXJ9|D8KXJ9_DICAN	83	Ribosomal protein L2 (Fragment) OS=Dicksonia antarctica GN=rpl2 PE=4 SV=1	tr|D8KXJ9|D8KXJ9_DICAN	16 kDa		-1.58			mapped	D8TEA9	887	D8TEA9_SELML	2.21085e-65	tr|D8TEA9|D8TEA9_SELML	tr|D8KXJ9|D8KXJ9_DICAN	sp|P56791|RK2_ARATH	P56791	RK2_ARATH	1.54866e-75
Scaffold	tr|C5YRG8|C5YRG8_SORBI	1108	Putative uncharacterized protein Sb08g020780 OS=Sorghum bicolor GN=Sb08g020780 PE=4 SV=1	tr|C5YRG8|C5YRG8_SORBI	175 kDa		-1.58			notMapped		888				tr|C5YRG8|C5YRG8_SORBI	sp|Q9ZVI7|GAUT7_ARATH	Q9ZVI7	GAUT7_ARATH	1.12367e-165
Scaffold	tr|C1DZ09|C1DZ09_MICSR	1125	Dynein-1-alpha heavy chain, flagellar inner arm I1 complex OS=Micromonas sp. (strain RCC299 / NOUM17) GN=DHC1.1 PE=4 SV=1	tr|C1DZ09|C1DZ09_MICSR	500 kDa		-1.58			notMapped		889				tr|C1DZ09|C1DZ09_MICSR	sp|P49201|RS232_ARATH	P49201	RS232_ARATH	1.62455e-86
Scaffold	tr|C0JWM4|C0JWM4_MONSK	25	30S ribosomal protein S14, chloroplastic OS=Monomastix sp. (strain OKE-1) GN=rps14 PE=3 SV=1	tr|C0JWM4|C0JWM4_MONSK	11 kDa		-1.58			notMapped		890				tr|C0JWM4|C0JWM4_MONSK	sp|O03042|RBL_ARATH	O03042	RBL_ARATH	0
Scaffold	tr|B9RFW4|B9RFW4_RICCO	531	Pyruvate dehydrogenase, putative OS=Ricinus communis GN=RCOM_1437610 PE=4 SV=1	tr|B9RFW4|B9RFW4_RICCO	39 kDa		-1.58			mapped	D8S8H8	891	D8S8H8_SELML	0	tr|D8S8H8|D8S8H8_SELML	tr|B9RFW4|B9RFW4_RICCO	sp|Q38799|ODPB1_ARATH	Q38799	ODPB1_ARATH	0
Scaffold	tr|B9REP7|B9REP7_RICCO	520	Aldo/keto reductase, putative OS=Ricinus communis GN=RCOM_1427600 PE=4 SV=1	tr|B9REP7|B9REP7_RICCO (+1)	39 kDa	1	-1.58	1	DOC	mapped	D8RU64	892	D8RU64_SELML	1.30745e-159	tr|D8RU64|D8RU64_SELML	tr|B9REP7|B9REP7_RICCO	sp|Q93ZN2|ALKR4_ARATH	Q93ZN2	ALKR4_ARATH	2.79003e-146
Scaffold	tr|B9H3K1|B9H3K1_POPTR	797	Cluster of Predicted protein OS=Populus trichocarpa GN=POPTRDRAFT_648236 PE=3 SV=1 (tr|B9H3K1|B9H3K1_POPTR)	tr|B9H3K1|B9H3K1_POPTR [2]	56 kDa	1	-1.58	1	DOC	mapped	D8QTG6	893	D8QTG6_SELML	0	tr|D8QTG6|D8QTG6_SELML	tr|B9H3K1|B9H3K1_POPTR	sp|Q42521|DCE1_ARATH	Q42521	DCE1_ARATH	0
Scaffold	tr|B7U6L4|B7U6L4_WHEAT	907	Globulin 3 OS=Triticum aestivum GN=glo-3A PE=4 SV=1	tr|B7U6L4|B7U6L4_WHEAT (+3)	66 kDa		-1.58			notMapped		894				tr|B7U6L4|B7U6L4_WHEAT	sp|O03042|RBL_ARATH	O03042	RBL_ARATH	0
Scaffold	tr|B1N6S3|B1N6S3_9FABA	15	Glyceraldehyde 3-phosphate dehydrogenase (Fragment) OS=Prosopis argentina GN=G3pdh PE=4 SV=1	tr|B1N6S3|B1N6S3_9FABA	9 kDa		-1.58			notMapped		895				tr|B1N6S3|B1N6S3_9FABA	sp|P35510|PAL1_ARATH	P35510	PAL1_ARATH	0
Scaffold	tr|A9SQV2|A9SQV2_PHYPA	112	Predicted protein OS=Physcomitrella patens subsp. patens GN=PHYPADRAFT_133671 PE=3 SV=1	tr|A9SQV2|A9SQV2_PHYPA	18 kDa		-1.58			notMapped		896				tr|A9SQV2|A9SQV2_PHYPA	sp|P50883|RL121_ARATH	P50883	RL121_ARATH	1.24467e-104
Scaffold	tr|A9S083|A9S083_PHYPA	57	Cluster of Predicted protein OS=Physcomitrella patens subsp. patens GN=PHYPADRAFT_72863 PE=4 SV=1 (tr|A9S083|A9S083_PHYPA)	tr|A9S083|A9S083_PHYPA [3]	14 kDa		-1.58			mapped	D8RB37	897	D8RB37_SELML	3.03913e-57	tr|D8RB37|D8RB37_SELML	tr|A9S083|A9S083_PHYPA	sp|Q9M9W1|RL222_ARATH	Q9M9W1	RL222_ARATH	1.35327e-52
Scaffold	tr|A2ZCS7|A2ZCS7_ORYSI	1083	Putative uncharacterized protein OS=Oryza sativa subsp. indica GN=OsI_35590 PE=4 SV=1	tr|A2ZCS7|A2ZCS7_ORYSI (+1)	125 kDa		-1.58			notMapped		898				tr|A2ZCS7|A2ZCS7_ORYSI	tr|Q9FFX6|Q9FFX6_ARATH	Q9FFX6	Q9FFX6_ARATH	7.43941e-159
Scaffold	tr|A0MZ38|A0MZ38_WHEAT	1005	Cluster of High molecular weight glutenin subunit OS=Triticum aestivum GN=Glu-1Ax PE=4 SV=1 (tr|A0MZ38|A0MZ38_WHEAT)	tr|A0MZ38|A0MZ38_WHEAT [18]	88 kDa		-1.58			notMapped		899				tr|A0MZ38|A0MZ38_WHEAT	noOrthologue	noOrthologue	noOrthologue	notMapped
Scaffold	sp|Q85FG4|RR12_ADICA	68	30S ribosomal protein S12, chloroplastic OS=Adiantum capillus-veneris GN=rps12 PE=2 SV=2	sp|Q85FG4|RR12_ADICA (+3)	15 kDa		-1.58			notMapped		900				sp|Q85FG4|RR12_ADICA	sp|O82499|IF1C_ARATH	O82499	IF1C_ARATH	9.4681e-27
Scaffold	sp|P93693|SPZ1B_WHEAT	594	Serpin-Z1B OS=Triticum aestivum PE=1 SV=1	sp|P93693|SPZ1B_WHEAT (+4)	43 kDa		-1.58			mapped	D8RS41	901	D8RS41_SELML	1.03537e-80	tr|D8RS41|D8RS41_SELML	sp|P93693|SPZ1B_WHEAT	sp|Q9S7T8|SPZX_ARATH	Q9S7T8	SPZX_ARATH	3.90807e-133
Scaffold	sp|A8IGK2|EFTS_CHLRE	420	Elongation factor Ts, mitochondrial OS=Chlamydomonas reinhardtii GN=EFTS PE=3 SV=1	sp|A8IGK2|EFTS_CHLRE (+1)	33 kDa		-1.58			notMapped		902				sp|A8IGK2|EFTS_CHLRE	sp|Q9SJL8|METK3_ARATH	Q9SJL8	METK3_ARATH	0
Scaffold	rr|REV_G7ZV87|REV_G7ZV87_MEDTR	1102	Multiple C2 and transmembrane domain-containing protein OS=Medicago truncatula GN=MTR_021s0014 PE=4 SV=1	rr|REV_G7ZV87|REV_G7ZV87_MEDTR	156 kDa		-1.58			notMapped		903				rr|REV_G7ZV87|REV_G7ZV87_MEDTR	tr|Q9SKZ0|Q9SKZ0_ARATH	Q9SKZ0	Q9SKZ0_ARATH	4.18317e-48
Scaffold	rr|REV_F6HGK3|REV_F6HGK3_VITVI	1107	Cytosine-specific methyltransferase OS=Vitis vinifera GN=VIT_07s0130g00390 PE=3 SV=1	rr|REV_F6HGK3|REV_F6HGK3_VITVI	175 kDa		-1.58			notMapped		904				rr|REV_F6HGK3|REV_F6HGK3_VITVI	tr|Q9SKZ0|Q9SKZ0_ARATH	Q9SKZ0	Q9SKZ0_ARATH	4.18317e-48
Scaffold	rr|REV_F4JKY1|REV_F4JKY1_ARATH	195	RNA polymerase II, Rpb4, core protein OS=Arabidopsis thaliana GN=NRPD4 PE=4 SV=1	rr|REV_F4JKY1|REV_F4JKY1_ARATH	22 kDa		-1.58			notMapped		905				rr|REV_F4JKY1|REV_F4JKY1_ARATH	tr|Q9SKZ0|Q9SKZ0_ARATH	Q9SKZ0	Q9SKZ0_ARATH	4.18317e-48
Scaffold	rr|REV_D8SK11|REV_D8SK11_SELML	334	Putative uncharacterized protein OS=Selaginella moellendorffii GN=SELMODRAFT_119049 PE=4 SV=1	rr|REV_D8SK11|REV_D8SK11_SELML (+1)	30 kDa		-1.58			notMapped		906				rr|REV_D8SK11|REV_D8SK11_SELML	tr|Q9SKZ0|Q9SKZ0_ARATH	Q9SKZ0	Q9SKZ0_ARATH	4.18317e-48
Scaffold	rr|REV_D7KV17|REV_D7KV17_ARALL	1072	Calmodulin binding protein OS=Arabidopsis lyrata subsp. lyrata GN=ARALYDRAFT_315745 PE=4 SV=1	rr|REV_D7KV17|REV_D7KV17_ARALL	115 kDa		-1.58			notMapped		907				rr|REV_D7KV17|REV_D7KV17_ARALL	tr|Q9SKZ0|Q9SKZ0_ARATH	Q9SKZ0	Q9SKZ0_ARATH	4.18317e-48
Scaffold	rr|REV_C1FGU7|REV_C1FGU7_MICSR	1098	DEAD/DEAH box helicase OS=Micromonas sp. (strain RCC299 / NOUM17) GN=MICPUN_61000 PE=4 SV=1	rr|REV_C1FGU7|REV_C1FGU7_MICSR	150 kDa		-1.58			notMapped		908				rr|REV_C1FGU7|REV_C1FGU7_MICSR	tr|Q9SKZ0|Q9SKZ0_ARATH	Q9SKZ0	Q9SKZ0_ARATH	4.18317e-48
Scaffold	rr|REV_B8B5Y7|REV_B8B5Y7_ORYSI	950	Putative uncharacterized protein OS=Oryza sativa subsp. indica GN=OsI_25953 PE=4 SV=1	rr|REV_B8B5Y7|REV_B8B5Y7_ORYSI (+2)	74 kDa		-1.58			notMapped		909				rr|REV_B8B5Y7|REV_B8B5Y7_ORYSI	tr|Q9SKZ0|Q9SKZ0_ARATH	Q9SKZ0	Q9SKZ0_ARATH	4.18317e-48
Scaffold	rr|REV_A9S0L4|REV_A9S0L4_PHYPA	601	Predicted protein OS=Physcomitrella patens subsp. patens GN=PHYPADRAFT_122336 PE=3 SV=1	rr|REV_A9S0L4|REV_A9S0L4_PHYPA	43 kDa		-1.58			notMapped		910				rr|REV_A9S0L4|REV_A9S0L4_PHYPA	tr|Q9SKZ0|Q9SKZ0_ARATH	Q9SKZ0	Q9SKZ0_ARATH	4.18317e-48
Scaffold	rr|REV_A4RQK3|REV_A4RQK3_OSTLU	1116	Predicted protein OS=Ostreococcus lucimarinus (strain CCE9901) GN=OSTLU_13608 PE=4 SV=1	rr|REV_A4RQK3|REV_A4RQK3_OSTLU	231 kDa		-1.58			notMapped		911				rr|REV_A4RQK3|REV_A4RQK3_OSTLU	tr|Q9SKZ0|Q9SKZ0_ARATH	Q9SKZ0	Q9SKZ0_ARATH	4.18317e-48
Scaffold	REV_199525-138_1_ORF2	3	REV_199525-138_1_ORF2	REV_199525-138_1_ORF2	7 kDa		-1.58			notMapped		912				REV_199525-138_1_ORF2	tr|Q9SKZ0|Q9SKZ0_ARATH	Q9SKZ0	Q9SKZ0_ARATH	4.18317e-48
Scaffold	96049-255_6_ORF1	935	>sp|Q8LL05|SSG1B_HORVU_Granule-bound_starch_synthase_1b,_chloroplastic/amyloplastic_(Fragment)_OS=Hordeum_vulgare_PE=1_SV=1|||0	96049-255_6_ORF1	70 kDa		-1.58			mapped	D8RTS9	913	D8RTS9_SELML	0	tr|D8RTS9|D8RTS9_SELML	96049-255_6_ORF1	sp|Q9MAQ0|SSG1_ARATH	Q9MAQ0	SSG1_ARATH	0
Scaffold	95879-255_3_ORF1	633	>sp|Q941Q3|C3H37_ARATH_Zinc_finger_CCCH_domain-containing_protein_37_OS=Arabidopsis_thaliana_GN=HUA1_PE=1_SV=1|||4e-102	95879-255_3_ORF1	46 kDa		-1.58			mapped	D8TCC9	914	D8TCC9_SELML	1.56296e-58	tr|D8TCC9|D8TCC9_SELML	95879-255_3_ORF1	sp|Q941Q3|C3H37_ARATH	Q941Q3	C3H37_ARATH	4.48326e-99
Scaffold	95154-256_3_ORF2	722	>sp|C7NTR1|RIBL_HALUD_FAD_synthase_OS=Halorhabdus_utahensis_(strain_DSM_12940_/_JCM_11049_/_AX-2)_GN=ribL_PE=3_SV=1|||6e-06	95154-256_3_ORF2	51 kDa		-1.58			notMapped		915				95154-256_3_ORF2	noOrthologue	noOrthologue	noOrthologue	notMapped
Scaffold	92246-261_3_ORF2	800	>sp|Q9Y305|ACOT9_HUMAN_Acyl-coenzyme_A_thioesterase_9,_mitochondrial_OS=Homo_sapiens_GN=ACOT9_PE=1_SV=2|||5e-60	92246-261_3_ORF2	57 kDa		-1.58			mapped	D8QTV6	916	D8QTV6_SELML	1.55111e-175	tr|D8QTV6|D8QTV6_SELML	92246-261_3_ORF2	tr|A8MR85|A8MR85_ARATH	A8MR85	A8MR85_ARATH	5.81969e-173
Scaffold	9185-781_2_ORF2	75	>sp|Q9SUU5|QCR71_ARATH_Cytochrome_b-c1_complex_subunit_7-1_OS=Arabidopsis_thaliana_GN=QCR7-1_PE=1_SV=1|||2e-50	9185-781_2_ORF2	16 kDa	1	-1.58	1	DOC	mapped	D8SUD6	917	D8SUD6_SELML	1.22973e-44	tr|D8SUD6|D8SUD6_SELML	9185-781_2_ORF2	sp|Q9SUU5|QCR71_ARATH	Q9SUU5	QCR71_ARATH	1.05312e-46
Scaffold	86125-270_2_ORF2	395	>sp|Q9XF88|CB4B_ARATH_Chlorophyll_a-b_binding_protein_CP29.2,_chloroplastic_OS=Arabidopsis_thaliana_GN=LHCB4.2_PE=1_SV=1|||5e-143	86125-270_2_ORF2	32 kDa		-1.58			mapped	D8RTB9	918	D8RTB9_SELML	1.31711e-138	tr|D8RTB9|D8RTB9_SELML	86125-270_2_ORF2	sp|Q9XF88|CB4B_ARATH	Q9XF88	CB4B_ARATH	5.04037e-140
Scaffold	8566-804_2_ORF2	524	>sp|Q8VYZ3|PME53_ARATH_Probable_pectinesterase_53_OS=Arabidopsis_thaliana_GN=PME53_PE=2_SV=1|||5e-115	8566-804_2_ORF2	39 kDa		-1.58			mapped	D8QSP7	919	D8QSP7_SELML	1.14835e-113	tr|D8QSP7|D8QSP7_SELML	8566-804_2_ORF2	sp|Q8VYZ3|PME53_ARATH	Q8VYZ3	PME53_ARATH	5.69982e-112
Scaffold	7327-852_2_ORF2	964	>sp|Q0VSR8|RS15_ALCBS_30S_ribosomal_protein_S15_OS=Alcanivorax_borkumensis_(strain_SK2_/_ATCC_700651_/_DSM_11573)_GN=rpsO_PE=3_SV=1|||1e-06	7327-852_2_ORF2 (+1)	77 kDa		-1.58			mapped	D8RPB3	920	D8RPB3_SELML	6.72272e-13	tr|D8RPB3|D8RPB3_SELML	7327-852_2_ORF2	sp|F4J4N3|DIR17_ARATH	F4J4N3	DIR17_ARATH	2.29314e-10
Scaffold	71095-299_4_ORF2	534	>sp|Q54TC5|MAFL2_DICDI_Maf-like_protein_DDB_G0281937_OS=Dictyostelium_discoideum_GN=DDB_G0281937_PE=3_SV=1|||2e-06	71095-299_4_ORF2	40 kDa		-1.58			mapped	D8T7W0	921	D8T7W0_SELML	1.2642e-145	tr|D8T7W0|D8T7W0_SELML	71095-299_4_ORF2	sp|Q9M8M3|PP136_ARATH	Q9M8M3	PP136_ARATH	0.091692
Scaffold	70730-300_2_ORF2	676	>sp|Q5SRX1|TM1L2_MOUSE_TOM1-like_protein_2_OS=Mus_musculus_GN=Tom1l2_PE=1_SV=1|||3e-38	70730-300_2_ORF2	48 kDa		-1.58			mapped	D8RBC3	922	D8RBC3_SELML	1.02921e-126	tr|D8RBC3|D8RBC3_SELML	70730-300_2_ORF2	sp|Q9LFL3|TOL1_ARATH	Q9LFL3	TOL1_ARATH	4.53917e-136
Scaffold	693-1852_1_ORF2	940	>sp|O82663|DHSA1_ARATH_Succinate_dehydrogenase_[ubiquinone]_flavoprotein_subunit_1,_mitochondrial_OS=Arabidopsis_thaliana_GN=SDH1-1_PE=1_SV=1|||0	693-1852_1_ORF2	71 kDa	1	-1.58	1	DOC	mapped	D8SP60	923	D8SP60_SELML	0	tr|D8SP60|D8SP60_SELML	693-1852_1_ORF2	sp|O82663|SDHA1_ARATH	O82663	SDHA1_ARATH	0
Scaffold	6712-886_5_ORF2	499	>sp|P51910|APOD_MOUSE_Apolipoprotein_D_OS=Mus_musculus_GN=Apod_PE=2_SV=1|||1e-17	6712-886_5_ORF2 (+1)	38 kDa		-1.58			mapped	D8RNU7	924	D8RNU7_SELML	1.71614e-122	tr|D8RNU7|D8RNU7_SELML	6712-886_5_ORF2	sp|Q9STS7|CHL_ARATH	Q9STS7	CHL_ARATH	4.45485e-130
Scaffold	6675-887_4_ORF2	1032	>sp|O22224|Y2162_ARATH_Uncharacterized_protein_At2g41620_OS=Arabidopsis_thaliana_GN=At2g41620_PE=2_SV=2|||0	6675-887_4_ORF2	97 kDa		-1.58			mapped	D8S7S4	925	D8S7S4_SELML	0	tr|D8S7S4|D8S7S4_SELML	6675-887_4_ORF2	sp|O22224|NP93A_ARATH	O22224	NP93A_ARATH	0
Scaffold	6128-919_1_ORF2	434	>sp|O49937|RK4_SPIOL_50S_ribosomal_protein_L4,_chloroplastic_OS=Spinacia_oleracea_GN=RPL4_PE=1_SV=1|||6e-101	6128-919_1_ORF2 (+2)	34 kDa		-1.58			mapped	D8R4X0	926	D8R4X0_SELML	2.18014e-101	tr|D8R4X0|D8R4X0_SELML	6128-919_1_ORF2	tr|Q3EDH2|Q3EDH2_ARATH	Q3EDH2	Q3EDH2_ARATH	4.84518e-89
Scaffold	547-2000_3_ORF1	564	>sp|Q96DH6|MSI2H_HUMAN_RNA-binding_protein_Musashi_homolog_2_OS=Homo_sapiens_GN=MSI2_PE=1_SV=1|||5e-27	547-2000_3_ORF1	42 kDa	1	-1.58	1	DOC	mapped	D8QPY6	927	D8QPY6_SELML	1.53348e-72	tr|D8QPY6|D8QPY6_SELML	547-2000_3_ORF1	sp|Q9LKA4|UBA2C_ARATH	Q9LKA4	UBA2C_ARATH	4.39425e-61
Scaffold	5-9806_2_ORF4	39	>sp|Q85FM1|RR14_ADICA_30S_ribosomal_protein_S14,_chloroplastic_OS=Adiantum_capillus-veneris_GN=rps14_PE=2_SV=2|||6e-58	5-9806_2_ORF4	13 kDa		-1.58			mapped	D8TE60	928	D8TE60_SELML	5.49091e-37	tr|D8TE60|D8TE60_SELML	5-9806_2_ORF4	sp|P56804|RR14_ARATH	P56804	RR14_ARATH	3.36084e-39
Scaffold	4250-1062_3_ORF1	781	>sp|Q2KJC9|AL7A1_BOVIN_Alpha-aminoadipic_semialdehyde_dehydrogenase_OS=Bos_taurus_GN=ALDH7A1_PE=2_SV=4|||0	4250-1062_3_ORF1	55 kDa		-1.58			mapped	D8R6Z4	929	D8R6Z4_SELML	0	tr|D8R6Z4|D8R6Z4_SELML	4250-1062_3_ORF1	sp|Q9SYG7|AL7B4_ARATH	Q9SYG7	AL7B4_ARATH	0
Scaffold	385832-28_1_ORF2	1057	>sp|Q9LU92|TGT4_ARATH_Trihelix_transcription_factor_GT-4_OS=Arabidopsis_thaliana_GN=GT-4_PE=2_SV=1|||8e-08	385832-28_1_ORF2	107 kDa		-1.58			mapped	D8QR48	930	D8QR48_SELML	1.01452e-17	tr|D8QR48|D8QR48_SELML	385832-28_1_ORF2	sp|Q8VZ20|ASR3_ARATH	Q8VZ20	ASR3_ARATH	1.01377e-14
Scaffold	38467-410_3_ORF2	1041	>sp|P37831|LOX11_SOLTU_Linoleate_9S-lipoxygenase_1_OS=Solanum_tuberosum_GN=LOX1.1_PE=2_SV=1|||0	38467-410_3_ORF2	102 kDa	1	-1.58	1	DOC	mapped	D8SDE9	931	D8SDE9_SELML	0	tr|D8SDE9|D8SDE9_SELML	38467-410_3_ORF2	sp|Q06327|LOX1_ARATH	Q06327	LOX1_ARATH	0
Scaffold	33588-437_2_ORF2	903	>sp|Q54KS4|GNL3_DICDI_Guanine_nucleotide-binding_protein-like_3_homolog_OS=Dictyostelium_discoideum_GN=gnl3_PE=3_SV=1|||6e-131	33588-437_2_ORF2	66 kDa		-1.58			mapped	D8RNZ2	932	D8RNZ2_SELML	0	tr|D8RNZ2|D8RNZ2_SELML	33588-437_2_ORF2	sp|Q9M8Z5|NSN1_ARATH	Q9M8Z5	NSN1_ARATH	0
Scaffold	312548-61_2_ORF2	206	>sp|Q7MQK8|THYX_WOLSU_Thymidylate_synthase_ThyX_OS=Wolinella_succinogenes_(strain_ATCC_29543_/_DSM_1740_/_LMG_7466_/_NCTC_11488_/_FDC_602W)_GN=thyX_PE=3_SV=1|||6e-06	312548-61_2_ORF2 (+2)	23 kDa		-1.58			notMapped		933				312548-61_2_ORF2	noOrthologue	noOrthologue	noOrthologue	notMapped
Scaffold	310791-62_3_ORF2	289	>sp|B6D1N4|HPXO_KLEPN_FAD-dependent_urate_hydroxylase_OS=Klebsiella_pneumoniae_GN=hpxO_PE=3_SV=1|||3e-16	310791-62_3_ORF2	27 kDa		-1.58			mapped	D8RQ39	934	D8RQ39_SELML	1.03511e-50	tr|D8RQ39|D8RQ39_SELML	310791-62_3_ORF2	tr|Q9ZQN9|Q9ZQN9_ARATH	Q9ZQN9	Q9ZQN9_ARATH	3.83765e-58
Scaffold	292324-72_4_ORF1	624	>sp|Q08CF3|CCD61_DANRE_Coiled-coil_domain-containing_protein_61_OS=Danio_rerio_GN=ccdc61_PE=2_SV=1|||2e-41	292324-72_4_ORF1 (+19)	45 kDa		-1.58			notMapped		935				292324-72_4_ORF1	sp|Q9LVP9|VTI13_ARATH	Q9LVP9	VTI13_ARATH	4.10915e-94
Scaffold	290025-74_6_ORF1	299	no_acceptable_match|||NA	290025-74_6_ORF1 (+1)	28 kDa		-1.58			notMapped		936				290025-74_6_ORF1	noOrthologue	noOrthologue	noOrthologue	notMapped
Scaffold	282673-78_2_ORF1	568	>sp|Q9SE96|GEML1_ARATH_GEM-like_protein_1_OS=Arabidopsis_thaliana_GN=FIP1_PE=1_SV=1|||3e-62	282673-78_2_ORF1	42 kDa	1	-1.58	1	DOC	mapped	D8S4D8	937	D8S4D8_SELML	2.13769e-70	tr|D8S4D8|D8S4D8_SELML	282673-78_2_ORF1	sp|Q9SE96|GEML1_ARATH	Q9SE96	GEML1_ARATH	1.08523e-58
Scaffold	279635-80_4_ORF1	165	>sp|P10871|RCA_SPIOL_Ribulose_bisphosphate_carboxylase/oxygenase_activase,_chloroplastic_OS=Spinacia_oleracea_PE=1_SV=2|||2e-33	279635-80_4_ORF1 (+3)	21 kDa		-1.58			notMapped		938				279635-80_4_ORF1	sp|Q9C820|RAG3D_ARATH	Q9C820	RAG3D_ARATH	9.80701e-130
Scaffold	279182-80_4_ORF2	805	>sp|Q01K11|GATP1_ORYSI_Gamma-aminobutyrate_transaminase_1,_mitochondrial_OS=Oryza_sativa_subsp._indica_GN=OsI_17385_PE=3_SV=1|||0	279182-80_4_ORF2	57 kDa		-1.58			mapped	D8RGS2	939	D8RGS2_SELML	0	tr|D8RGS2|D8RGS2_SELML	279182-80_4_ORF2	sp|Q94CE5|GATP_ARATH	Q94CE5	GATP_ARATH	0
Scaffold	274093-84_2_ORF1	363	>sp|Q9SA23|SYP51_ARATH_Syntaxin-51_OS=Arabidopsis_thaliana_GN=SYP51_PE=1_SV=1|||1e-72	274093-84_2_ORF1 (+1)	31 kDa		-1.58			notMapped		940				274093-84_2_ORF1	sp|Q9FMG4|SC35_ARATH	Q9FMG4	SC35_ARATH	3.74892e-65
Scaffold	261365-92_5_ORF2	126	>sp|Q9XEX2|PRX2B_ARATH_Peroxiredoxin-2B_OS=Arabidopsis_thaliana_GN=PRXIIB_PE=1_SV=1|||4e-93	261365-92_5_ORF2 (+1)	18 kDa	1	-1.58	1	DOC	mapped	D8SXT7	941	D8SXT7_SELML	1.69602e-85	tr|D8SXT7|D8SXT7_SELML	261365-92_5_ORF2	sp|Q9XEX2|PRX2B_ARATH	Q9XEX2	PRX2B_ARATH	9.65758e-90
Scaffold	252040-98_1_ORF2	469	>sp|P43394|K502_ACTDE_Fruit_protein_pKIWI502_OS=Actinidia_deliciosa_GN=pKIWI502_PE=2_SV=1|||3e-75	252040-98_1_ORF2 (+1)	36 kDa		-1.58			notMapped		942				252040-98_1_ORF2	noOrthologue	noOrthologue	noOrthologue	notMapped
Scaffold	242683-104_1_ORF2	268	>sp|Q9LL85|WHY1_SOLTU_Single-stranded_DNA-bindig_protein_WHY1,_chloroplastic_OS=Solanum_tuberosum_GN=WHY1_PE=1_SV=1|||1e-68	242683-104_1_ORF2 (+1)	26 kDa		-1.58			mapped	D8R3J9	943	D8R3J9_SELML	6.55115e-69	tr|D8R3J9|D8R3J9_SELML	242683-104_1_ORF2	sp|Q9M9S3|WHY1_ARATH	Q9M9S3	WHY1_ARATH	8.73539e-65
Scaffold	240028-106_6_ORF2	1037	>sp|Q7TP47|HNRPQ_RAT_Heterogeneous_nuclear_ribonucleoprotein_Q_OS=Rattus_norvegicus_GN=Syncrip_PE=2_SV=1|||4e-42	240028-106_6_ORF2 (+5)	99 kDa		-1.58			notMapped		944				240028-106_6_ORF2	sp|Q93YQ1|RTOR1_ARATH	Q93YQ1	RTOR1_ARATH	0
Scaffold	237120-108_3_ORF2	746	>sp|P58223|Y4837_ARATH_KH_domain-containing_protein_At4g18375_OS=Arabidopsis_thaliana_GN=At4g18375_PE=2_SV=1|||2e-24	237120-108_3_ORF2 (+2)	52 kDa		-1.58			mapped	D8T2R9	945	D8T2R9_SELML	2.93001e-115	tr|D8T2R9|D8T2R9_SELML	237120-108_3_ORF2	tr|A0A1I9LM90|A0A1I9LM90_ARATH	A0A1I9LM90	A0A1I9LM90_ARATH	1.08387e-125
Scaffold	231825-112_1_ORF1	201	>sp|Q9M7T0|PRX2F_ARATH_Peroxiredoxin-2F,_mitochondrial_OS=Arabidopsis_thaliana_GN=PRXIIF_PE=1_SV=2|||1e-87	231825-112_1_ORF1	23 kDa		-1.58			mapped	D8QR01	946	D8QR01_SELML	4.99258e-68	tr|D8QR01|D8QR01_SELML	231825-112_1_ORF1	sp|Q9M7T0|PRX2F_ARATH	Q9M7T0	PRX2F_ARATH	3.38657e-84
Scaffold	230543-113_2_ORF2	421	Cluster of >sp|Q9C5M0|DTC_ARATH_Mitochondrial_dicarboxylate/tricarboxylate_transporter_DTC_OS=Arabidopsis_thaliana_GN=DTC_PE=1_SV=1|||8e-180 (230543-113_2_ORF2)	230543-113_2_ORF2 [8]	33 kDa	1	-1.58	1	DOC	mapped	D8SU61	947	D8SU61_SELML	7.29357e-177	tr|D8SU61|D8SU61_SELML	230543-113_2_ORF2	sp|Q9C5M0|DTC_ARATH	Q9C5M0	DTC_ARATH	5.71138e-177
Scaffold	2243-1340_2_ORF2	470	>sp|Q84TF0|AKRCA_ARATH_Aldo-keto_reductase_family_4_member_C10_OS=Arabidopsis_thaliana_GN=AKR4C10_PE=1_SV=1|||7e-134	2243-1340_2_ORF2	36 kDa		-1.58			mapped	D8QU80	948	D8QU80_SELML	5.10158e-127	tr|D8QU80|D8QU80_SELML	2243-1340_2_ORF2	sp|Q84TF0|AKRCA_ARATH	Q84TF0	AKRCA_ARATH	6.84737e-131
Scaffold	22042-532_3_ORF1	668	>sp|Q5CZR5|NATTL_DANRE_Natterin-like_protein_OS=Danio_rerio_GN=zgc:113413_PE=2_SV=1|||1e-46	22042-532_3_ORF1 (+1)	48 kDa		-1.58			mapped	D8S316	949	D8S316_SELML	5.29351e-21	tr|D8S316|D8S316_SELML	22042-532_3_ORF1	noOrthologue	noOrthologue	noOrthologue	notMapped
Scaffold	218969-122_1_ORF2	309	>sp|Q9SC19|UPTG1_SOLTU_Alpha-1,4-glucan-protein_synthase_[UDP-forming]_1_OS=Solanum_tuberosum_GN=UPTG1_PE=1_SV=2|||4e-175	218969-122_1_ORF2	28 kDa		-1.58			mapped	D8QNK1	950	D8QNK1_SELML	2.6691e-172	tr|D8QNK1|D8QNK1_SELML	218969-122_1_ORF2	sp|Q9SRT9|RGP1_ARATH	Q9SRT9	RGP1_ARATH	3.57046e-169
Scaffold	21858-534_3_ORF1	973	>sp|P33731|SRP72_CANFA_Signal_recognition_particle_72_kDa_protein_OS=Canis_familiaris_GN=SRP72_PE=1_SV=3|||1e-84	21858-534_3_ORF1	79 kDa		-1.58			mapped	D8QYK3	951	D8QYK3_SELML	1.0511e-154	tr|D8QYK3|D8QYK3_SELML	21858-534_3_ORF1	tr|Q9FXD4|Q9FXD4_ARATH	Q9FXD4	Q9FXD4_ARATH	2.32161e-180
Scaffold	21793-534_6_ORF2	733	>sp|Q6BCL1|PRAM_MOUSE_PML-RARA-regulated_adapter_molecule_1_OS=Mus_musculus_GN=Pram1_PE=1_SV=2|||4e-04	21793-534_6_ORF2	51 kDa	1	-1.58	1	DOC	notMapped		952				21793-534_6_ORF2	tr|Q8W461|Q8W461_ARATH	Q8W461	Q8W461_ARATH	2.85923e-10
Scaffold	212447-127_2_ORF2	280	>sp|Q9SDM1|CB121_HORVU_Chlorophyll_a-b_binding_protein_1B-21,_chloroplastic_OS=Hordeum_vulgare_GN=LHC_Ib-21_PE=1_SV=1|||2e-125	212447-127_2_ORF2 (+1)	27 kDa		-1.58			mapped	D8SKP9	953	D8SKP9_SELML	1.41565e-129	tr|D8SKP9|D8SKP9_SELML	212447-127_2_ORF2	sp|Q01667|CAB6_ARATH	Q01667	CAB6_ARATH	1.1259e-114
Scaffold	209389-129_2_ORF1	714	>sp|P0CY93|FPRA_RHOCA_Type_A_flavoprotein_fprA_OS=Rhodobacter_capsulatus_GN=fprA_PE=1_SV=1|||4e-06	209389-129_2_ORF1	50 kDa		-1.58			mapped	D8RR00	954	D8RR00_SELML	7.51541e-160	tr|D8RR00|D8RR00_SELML	209389-129_2_ORF1	tr|Q9FIJ5|Q9FIJ5_ARATH	Q9FIJ5	Q9FIJ5_ARATH	4.39505e-173
Scaffold	196795-140_6_ORF2	941	>sp|Q9FNF2|SSY1_ARATH_Starch_synthase_1,_chloroplastic/amyloplastic_OS=Arabidopsis_thaliana_GN=SS1_PE=2_SV=1|||0	196795-140_6_ORF2 (+2)	71 kDa		-1.58			mapped	D8QWI4	955	D8QWI4_SELML	0	tr|D8QWI4|D8QWI4_SELML	196795-140_6_ORF2	sp|Q9FNF2|SSY1_ARATH	Q9FNF2	SSY1_ARATH	0
Scaffold	193220-144_3_ORF2	269	>sp|P49332|GSTXC_TOBAC_Probable_glutathione_S-transferase_parC_OS=Nicotiana_tabacum_GN=PARC_PE=2_SV=1|||2e-77	193220-144_3_ORF2 (+1)	26 kDa	1	-1.58	1	DOC	mapped	D8SFL1	956	D8SFL1_SELML	6.30017e-75	tr|D8SFL1|D8SFL1_SELML	193220-144_3_ORF2	sp|Q8L7C9|GSTUK_ARATH	Q8L7C9	GSTUK_ARATH	1.85718e-66
Scaffold	188212-148_2_ORF1	834	>sp|Q0WQF7|OPD21_ARATH_Dihydrolipoyllysine-residue_acetyltransferase_component_1_of_pyruvate_dehydrogenase_complex,_mitochondrial_OS=Arabidopsis_thaliana_GN=LTA3_PE=1_SV=2|||9e-144	188212-148_2_ORF1 (+1)	59 kDa		-1.58			mapped	D8RQU8	957	D8RQU8_SELML	8.33089e-153	tr|D8RQU8|D8RQU8_SELML	188212-148_2_ORF1	sp|Q0WQF7|ODP21_ARATH	Q0WQF7	ODP21_ARATH	5.27238e-141
Scaffold	187630-149_2_ORF1	750	>sp|Q5E9R3|EHD1_BOVIN_EH_domain-containing_protein_1_OS=Bos_taurus_GN=EHD1_PE=2_SV=1|||6e-151	187630-149_2_ORF1 (+1)	52 kDa		-1.58			mapped	D8RG16	958	D8RG16_SELML	0	tr|D8RG16|D8RG16_SELML	187630-149_2_ORF1	sp|Q94CF0|EHD1_ARATH	Q94CF0	EHD1_ARATH	0
Scaffold	18370-579_2_ORF2	1073	>sp|O48963|PHOT1_ARATH_Phototropin-1_OS=Arabidopsis_thaliana_GN=PHOT1_PE=1_SV=1|||0	18370-579_2_ORF2	116 kDa		-1.58			mapped	D8T7Q7	959	D8T7Q7_SELML	0	tr|D8T7Q7|D8T7Q7_SELML	18370-579_2_ORF2	sp|P93025|PHOT2_ARATH	P93025	PHOT2_ARATH	0
Scaffold	183265-153_2_ORF1	916	>sp|P43309|PPO_MALDO_Polyphenol_oxidase,_chloroplastic_OS=Malus_domestica_PE=2_SV=1|||3e-170	183265-153_2_ORF1	68 kDa	1	-1.58	1	DOC	mapped	D8T3T5	960	D8T3T5_SELML	2.02461e-172	tr|D8T3T5|D8T3T5_SELML	183265-153_2_ORF1	noOrthologue	noOrthologue	noOrthologue	notMapped
Scaffold	181364-155_6_ORF1	1007	>sp|O23647|GLGB1_ARATH_1,4-alpha-glucan-branching_enzyme_2-1,_chloroplastic/amyloplastic_OS=Arabidopsis_thaliana_GN=SBE2.1_PE=1_SV=1|||0	181364-155_6_ORF1 (+1)	89 kDa		-1.58			mapped	D8QQR9	961	D8QQR9_SELML	0	tr|D8QQR9|D8QQR9_SELML	181364-155_6_ORF1	sp|Q9LZS3|GLGB2_ARATH	Q9LZS3	GLGB2_ARATH	0
Scaffold	181254-155_4_ORF1	875	>sp|P48417|CP74_LINUS_Allene_oxide_synthase,_chloroplastic_OS=Linum_usitatissimum_GN=CYP74A_PE=1_SV=1|||2e-150	181254-155_4_ORF1 (+1)	63 kDa		-1.58			mapped	D8S631	962	D8S631_SELML	6.99027e-147	tr|D8S631|D8S631_SELML	181254-155_4_ORF1	sp|Q96242|CP74A_ARATH	Q96242	CP74A_ARATH	9.57329e-143
Scaffold	180720-155_2_ORF2	519	>sp|Q39219|AOX1A_ARATH_Ubiquinol_oxidase_1a,_mitochondrial_OS=Arabidopsis_thaliana_GN=AOX1A_PE=1_SV=2|||4e-157	180720-155_2_ORF2	39 kDa		-1.58			mapped	D8SM55	963	D8SM55_SELML	1.07448e-144	tr|D8SM55|D8SM55_SELML	180720-155_2_ORF2	sp|Q39219|AOX1A_ARATH	Q39219	AOX1A_ARATH	3.1855e-154
Scaffold	180635-155_1_ORF2	969	>sp|Q8H124|Y2446_ARATH_Uncharacterized_protein_At2g34460,_chloroplastic_OS=Arabidopsis_thaliana_GN=At2g34460_PE=1_SV=1|||2e-44	180635-155_1_ORF2	78 kDa	1	-1.58	1	DOC	mapped	D8R3U6	964	D8R3U6_SELML	3.89085e-84	tr|D8R3U6|D8R3U6_SELML	180635-155_1_ORF2	sp|Q8H124|Y2446_ARATH	Q8H124	Y2446_ARATH	3.7611e-40
Scaffold	173894-162_1_ORF1	582	>sp|Q8GXR9|DHNA_ARATH_NADH_dehydrogenase_C1,_chloroplastic/mitochondrial_OS=Arabidopsis_thaliana_GN=NDC1_PE=1_SV=2|||7e-160	173894-162_1_ORF1	42 kDa		-1.58			mapped	D8S0F2	965	D8S0F2_SELML	2.65338e-151	tr|D8S0F2|D8S0F2_SELML	173894-162_1_ORF1	sp|Q8GXR9|NDC1_ARATH	Q8GXR9	NDC1_ARATH	3.54291e-157
Scaffold	17189-596_1_ORF2	175	>sp|P51414|RL261_ARATH_60S_ribosomal_protein_L26-1_OS=Arabidopsis_thaliana_GN=RPL26A_PE=2_SV=2|||7e-85	17189-596_1_ORF2	22 kDa	1	-1.58	1	DOC	mapped	D8QWN3	966	D8QWN3_SELML	1.63067e-86	tr|D8QWN3|D8QWN3_SELML	17189-596_1_ORF2	sp|P51414|RL261_ARATH	P51414	RL261_ARATH	2.06723e-81
Scaffold	171131-165_3_ORF2	1039	>sp|O31641|YJCS_BACSU_Uncharacterized_protein_YjcS_OS=Bacillus_subtilis_(strain_168)_GN=yjcS_PE=1_SV=1|||2e-06	171131-165_3_ORF2 (+1)	100 kDa		-1.58			mapped	D8TED2	967	D8TED2_SELML	1.6108e-44	tr|D8TED2|D8TED2_SELML	171131-165_3_ORF2	tr|Q940N7|Q940N7_ARATH	Q940N7	Q940N7_ARATH	5.89402e-42
Scaffold	16789-603_2_ORF2	379	>sp|Q7XLR1|PIP26_ORYSJ_Probable_aquaporin_PIP2-6_OS=Oryza_sativa_subsp._japonica_GN=PIP2-6_PE=2_SV=2|||7e-160	16789-603_2_ORF2 (+1)	32 kDa		-1.58			mapped	D8RKL8	968	D8RKL8_SELML	7.35041e-157	tr|D8RKL8|D8RKL8_SELML	16789-603_2_ORF2	sp|Q9ZVX8|PIP28_ARATH	Q9ZVX8	PIP28_ARATH	5.05786e-156
Scaffold	162652-176_2_ORF2	946	>sp|Q9LVI6|RLK90_ARATH_Probable_inactive_receptor_kinase_RLK902_OS=Arabidopsis_thaliana_GN=RLK902_PE=1_SV=1|||0	162652-176_2_ORF2	73 kDa		-1.58			mapped	D8QPS4	969	D8QPS4_SELML	0	tr|D8QPS4|D8QPS4_SELML	162652-176_2_ORF2	sp|O48788|Y2267_ARATH	O48788	Y2267_ARATH	0
Scaffold	16190-613_2_ORF2	53	Cluster of >sp|Q9C9Y6|TRXH9_ARATH_Thioredoxin_H9_OS=Arabidopsis_thaliana_GN=TRX9_PE=1_SV=1|||2e-46 (16190-613_2_ORF2)	16190-613_2_ORF2 [2]	14 kDa	1	-1.58	1	DOC	mapped	D8SI82	970	D8SI82_SELML	3.95622e-37	tr|D8SI82|D8SI82_SELML	16190-613_2_ORF2	sp|Q9C9Y6|TRXH9_ARATH	Q9C9Y6	TRXH9_ARATH	1.48972e-42
Scaffold	159130-181_1_ORF2	882	>sp|P29402|CALX1_ARATH_Calnexin_homolog_1_OS=Arabidopsis_thaliana_GN=CNX1_PE=1_SV=1|||0	159130-181_1_ORF2 (+1)	64 kDa		-1.58			mapped	D8RBZ4	971	D8RBZ4_SELML	1.51074e-60	tr|D8RBZ4|D8RBZ4_SELML	159130-181_1_ORF2	sp|P29402|CALX1_ARATH	P29402	CALX1_ARATH	0
Scaffold	155797-186_3_ORF2	80	>sp|P46297|RS23_FRAAN_40S_ribosomal_protein_S23_OS=Fragaria_ananassa_GN=RPS23_PE=2_SV=1|||6e-100	155797-186_3_ORF2	16 kDa		-1.58			mapped	D8R982	972	D8R982_SELML	2.85591e-98	tr|D8R982|D8R982_SELML	155797-186_3_ORF2	sp|P49201|RS232_ARATH	P49201	RS232_ARATH	1.3252e-94
Scaffold	153507-190_3_ORF2	884	>sp|Q8SKU2|TIC62_PEA_Protein_TIC_62,_chloroplastic_OS=Pisum_sativum_GN=TIC62_PE=1_SV=2|||1e-20	153507-190_3_ORF2 (+1)	65 kDa	1	-1.58	1	DOC	mapped	D8RR91	973	D8RR91_SELML	2.0962e-67	tr|D8RR91|D8RR91_SELML	153507-190_3_ORF2	sp|Q9STF2|PTA16_ARATH	Q9STF2	PTA16_ARATH	3.69251e-81
Scaffold	150617-196_1_ORF1	1009	>sp|O94039|TKT1_CANAX_Transketolase_1_OS=Candida_albicans_GN=TKT1_PE=3_SV=1|||0	150617-196_1_ORF1	90 kDa		-1.58			mapped	D8SNX4	974	D8SNX4_SELML	0	tr|D8SNX4|D8SNX4_SELML	150617-196_1_ORF1	sp|F4IW47|TKTC2_ARATH	F4IW47	TKTC2_ARATH	0
Scaffold	149779-198_4_ORF1	1099	>sp|P94453|ALF_GEOSE_Fructose-bisphosphate_aldolase_OS=Geobacillus_stearothermophilus_GN=fba_PE=3_SV=3|||2e-59	149779-198_4_ORF1 (+1)	151 kDa		-1.58			mapped	D8SU30	975	D8SU30_SELML	0	tr|D8SU30|D8SU30_SELML	149779-198_4_ORF1	tr|Q8VYC5|Q8VYC5_ARATH	Q8VYC5	Q8VYC5_ARATH	0
Scaffold	1479-1530_5_ORF1	680	>sp|O94432|YHKF_SCHPO_Uncharacterized_RNA-binding_protein_C660.15_OS=Schizosaccharomyces_pombe_(strain_972_/_ATCC_24843)_GN=SPBC660.15_PE=2_SV=1|||1e-29	1479-1530_5_ORF1 (+3)	48 kDa		-1.58			mapped	D8QPR6	976	D8QPR6_SELML	8.50522e-77	tr|D8QPR6|D8QPR6_SELML	1479-1530_5_ORF1	sp|Q9LKA4|UBA2C_ARATH	Q9LKA4	UBA2C_ARATH	1.16803e-79
Scaffold	143336-204_5_ORF2	495	>sp|Q9SRK5|LSF2_ARATH_Phosphoglucan_phosphatase_LSF2,_chloroplastic_OS=Arabidopsis_thaliana_GN=LSF2_PE=2_SV=1|||1e-108	143336-204_5_ORF2 (+1)	38 kDa		-1.58			mapped	D8SKE1	977	D8SKE1_SELML	5.32398e-109	tr|D8SKE1|D8SKE1_SELML	143336-204_5_ORF2	sp|Q9SRK5|LSF2_ARATH	Q9SRK5	LSF2_ARATH	1.69743e-105
Scaffold	141256-205_6_ORF1	34	>sp|Q4P219|NNRD_USTMA_ATP-dependent_(S)-NAD(P)H-hydrate_dehydratase_OS=Ustilago_maydis_(strain_521_/_FGSC_9021)_GN=UM05844_PE=3_SV=1|||2e-06	141256-205_6_ORF1	12 kDa		-1.58			notMapped		978				141256-205_6_ORF1	sp|P45434|SSRA_ARATH	P45434	SSRA_ARATH	4.81477e-63
Scaffold	132771-213_4_ORF1	8	>sp|Q6LUQ1|ACEK_PHOPR_Isocitrate_dehydrogenase_kinase/phosphatase_OS=Photobacterium_profundum_GN=aceK_PE=3_SV=1|||2e-07	132771-213_4_ORF1	8 kDa		-1.58			notMapped		979				132771-213_4_ORF1	tr|O48783|O48783_ARATH	O48783	O48783_ARATH	3.47742e-108
Scaffold	131314-214_1_ORF2	329	>sp|P0C8V0|CA16_CONPL_Alpha-conotoxin-like_Pu1.6_OS=Conus_pulicarius_PE=2_SV=1|||4e-07	131314-214_1_ORF2 (+1)	29 kDa		-1.58			notMapped		980				131314-214_1_ORF2	sp|Q9FKS5|CYC1B_ARATH	Q9FKS5	CYC1B_ARATH	1.39485e-149
Scaffold	123797-222_2_ORF2	167	>sp|Q9FT52|ATP5H_ARATH_ATP_synthase_subunit_d,_mitochondrial_OS=Arabidopsis_thaliana_GN=At3g52300_PE=1_SV=3|||2e-59	123797-222_2_ORF2 (+1)	21 kDa		-1.58			mapped	D8S8T4	981	D8S8T4_SELML	5.54312e-17	tr|D8S8T4|D8S8T4_SELML	123797-222_2_ORF2	sp|Q9FT52|ATP5H_ARATH	Q9FT52	ATP5H_ARATH	8.37296e-56
Scaffold	116728-229_5_ORF1	19	>sp|P13853|HS17C_ARATH_17.6_kDa_class_I_heat_shock_protein_3_OS=Arabidopsis_thaliana_GN=HSP17.6C_PE=2_SV=2|||2e-43	116728-229_5_ORF1	11 kDa	1	-1.58	1	DOC	mapped	D8QMQ4	982	D8QMQ4_SELML	3.68869e-29	tr|D8QMQ4|D8QMQ4_SELML	116728-229_5_ORF1	sp|P13853|HS17C_ARATH	P13853	HS17C_ARATH	1.42924e-39
Scaffold	11634-704_5_ORF2	763	>sp|P54654|CAP_DICDI_Adenylyl_cyclase-associated_protein_OS=Dictyostelium_discoideum_GN=cap_PE=1_SV=1|||4e-93	11634-704_5_ORF2	53 kDa		-1.58			mapped	D8SV95	983	D8SV95_SELML	0	tr|D8SV95|D8SV95_SELML	11634-704_5_ORF2	sp|O65902|ACAP1_ARATH	O65902	ACAP1_ARATH	3.76628e-180
Scaffold	114955-231_1_ORF1	934	>sp|P32068|TRPE_ARATH_Anthranilate_synthase_component_I-1,_chloroplastic_OS=Arabidopsis_thaliana_GN=ASA1_PE=2_SV=1|||0	114955-231_1_ORF1 (+3)	70 kDa		-1.58			mapped	D8RT93	984	D8RT93_SELML	0	tr|D8RT93|D8RT93_SELML	114955-231_1_ORF1	tr|A0A1I9LMN9|A0A1I9LMN9_ARATH	A0A1I9LMN9	A0A1I9LMN9_ARATH	0
Scaffold	105255-243_5_ORF2	683	no_acceptable_match|||NA	105255-243_5_ORF2	48 kDa		-1.58			mapped	D8S5U5	985	D8S5U5_SELML	1.78307e-133	tr|D8S5U5|D8S5U5_SELML	105255-243_5_ORF2	sp|Q8L733|Y4121_ARATH	Q8L733	Y4121_ARATH	1.83355e-131
Scaffold	418542-15_2_ORF1	1042	Cluster of >sp|O23404|PPDK1_ARATH_Pyruvate,_phosphate_dikinase_1,_chloroplastic_OS=Arabidopsis_thaliana_GN=PPDK_PE=1_SV=2|||0 (418542-15_2_ORF1)	418542-15_2_ORF1 [22]	102 kDa	1	-1.64	1	DOC	mapped	D8R4T7	986	D8R4T7_SELML	0	tr|D8R4T7|D8R4T7_SELML	418542-15_2_ORF1	sp|O23404|PPDK1_ARATH	O23404	PPDK1_ARATH	0
Scaffold	ZZ_FGCZCont0126	842	Cluster of gi|71528|pir|| KRHU0 keratin 10, type I, cytoskeletal (clone lambda-KH (ZZ_FGCZCont0126)	ZZ_FGCZCont0126 [20]	60 kDa	1	-1.65	1	DOC	notMapped		987				ZZ_FGCZCont0126	tr|Q8H0S3|Q8H0S3_ARATH	Q8H0S3	Q8H0S3_ARATH	0
Scaffold	30007-462_3_ORF2	114	Cluster of >sp|Q10155|RNZ1_SCHPO_Probable_ribonuclease_Z_1_OS=Schizosaccharomyces_pombe_(strain_972_/_ATCC_24843)_GN=SPAC1D4.10_PE=2_SV=1|||5e-06 (30007-462_3_ORF2)	30007-462_3_ORF2 [2]	18 kDa	1	-1.66	1	DOC	mapped	D8R3H3	988	D8R3H3_SELML	1.32955e-32	tr|D8R3H3|D8R3H3_SELML	30007-462_3_ORF2	tr|O22978|O22978_ARATH	O22978	O22978_ARATH	4.54918e-28
Scaffold	222710-119_2_ORF2	621	Cluster of >sp|Q9LNE3|SCRK2_ARATH_Probable_fructokinase-2_OS=Arabidopsis_thaliana_GN=At1g06030_PE=2_SV=1|||3e-164 (222710-119_2_ORF2)	222710-119_2_ORF2 [5]	45 kDa	1	-1.66	1	DOC	mapped	D8QY61	989	D8QY61_SELML	0	tr|D8QY61|D8QY61_SELML	222710-119_2_ORF2	sp|Q9C524|SCRK6_ARATH	Q9C524	SCRK6_ARATH	2.94699e-180
Scaffold	78100-285_6_ORF1	157	Cluster of no_acceptable_match|||NA (78100-285_6_ORF1)	78100-285_6_ORF1 [3]	20 kDa	1	-1.7	1	DOC	mapped	D8ST50	990	D8ST50_SELML	9.63147e-54	tr|D8ST50|D8ST50_SELML	78100-285_6_ORF1	sp|O48737|TRXM1_ARATH	O48737	TRXM1_ARATH	3.72876e-54
Scaffold	4911-1004_2_ORF2	485	>sp|O65751|RSSA_CICAR_40S_ribosomal_protein_SA_OS=Cicer_arietinum_GN=RAP40_PE=2_SV=1|||2e-145	4911-1004_2_ORF2	37 kDa	1	-1.74	1	DOC	mapped	D8R6P7	991	D8R6P7_SELML	4.79824e-145	tr|D8R6P7|D8R6P7_SELML	4911-1004_2_ORF2	sp|Q8H173|RSSA2_ARATH	Q8H173	RSSA2_ARATH	4.18426e-139
Scaffold	350227-43_2_ORF2	647	>sp|Q96255|SERC_ARATH_Phosphoserine_aminotransferase,_chloroplastic_OS=Arabidopsis_thaliana_GN=At4g35630_PE=2_SV=1|||0	350227-43_2_ORF2	46 kDa	1	-1.74	1	DOC	mapped	D8T6I5	992	D8T6I5_SELML	0	tr|D8T6I5|D8T6I5_SELML	350227-43_2_ORF2	sp|Q96255|SERB1_ARATH	Q96255	SERB1_ARATH	0
Scaffold	133239-212_4_ORF2	471	>sp|P13447|LAT52_SOLLC_Anther-specific_protein_LAT52_OS=Solanum_lycopersicum_GN=LAT52_PE=2_SV=1|||9e-14	133239-212_4_ORF2 (+1)	36 kDa	1	-1.74	1	DOC	mapped	D8TDP3	993	D8TDP3_SELML	4.59755e-52	tr|D8TDP3|D8TDP3_SELML	133239-212_4_ORF2	tr|Q8RWG5|Q8RWG5_ARATH	Q8RWG5	Q8RWG5_ARATH	6.10012e-29
Scaffold	27243-483_2_ORF1	1082	>sp|Q8N163|K1967_HUMAN_DBIRD_complex_subunit_KIAA1967_OS=Homo_sapiens_GN=KIAA1967_PE=1_SV=2|||2e-31	27243-483_2_ORF1 (+1)	123 kDa	1	-1.77	1	DOC	mapped	D8SBC9	994	D8SBC9_SELML	5.08595e-44	tr|D8SBC9|D8SBC9_SELML	27243-483_2_ORF1	sp|F4IS91|RSA1_ARATH	F4IS91	RSA1_ARATH	9.02076e-73
Scaffold	ZZ_FGCZCont0029	618	sp|K1H4_HUMAN|	ZZ_FGCZCont0029 (+1)	45 kDa	1	-1.81	1	DOC	notMapped		995				ZZ_FGCZCont0029	tr|Q8H0S3|Q8H0S3_ARATH	Q8H0S3	Q8H0S3_ARATH	0
Scaffold	218185-123_1_ORF1	424	>sp|Q8VY52|PPD2_ARATH_PsbP_domain-containing_protein_2,_chloroplastic_OS=Arabidopsis_thaliana_GN=PPD2_PE=1_SV=1|||8e-52	218185-123_1_ORF1	33 kDa	1	-1.81	1	DOC	mapped	D8RE44	996	D8RE44_SELML	4.7068e-54	tr|D8RE44|D8RE44_SELML	218185-123_1_ORF1	sp|Q8VY52|PPD2_ARATH	Q8VY52	PPD2_ARATH	3.97718e-48
Scaffold	15658-619_6_ORF2	789	>sp|Q42290|MPPB_ARATH_Probable_mitochondrial-processing_peptidase_subunit_beta_OS=Arabidopsis_thaliana_GN=At3g02090_PE=1_SV=2|||0	15658-619_6_ORF2 (+1)	55 kDa	1	-1.81	1	DOC	mapped	D8RE06	997	D8RE06_SELML	0	tr|D8RE06|D8RE06_SELML	15658-619_6_ORF2	sp|Q42290|MPPB_ARATH	Q42290	MPPB_ARATH	0
Scaffold	6971-870_2_ORF2	324	Cluster of >sp|Q94AH9|MD36A_ARATH_Mediator_of_RNA_polymerase_II_transcription_subunit_36a_OS=Arabidopsis_thaliana_GN=MED36A_PE=1_SV=2|||3e-165 (6971-870_2_ORF2)	6971-870_2_ORF2 [4]	29 kDa	1	-1.91	1	DOC	mapped	D8RFP8	998	D8RFP8_SELML	1.52383e-152	tr|D8RFP8|D8RFP8_SELML	6971-870_2_ORF2	sp|Q94AH9|MD36A_ARATH	Q94AH9	MD36A_ARATH	2.32555e-162
Scaffold	ZZ_FGCZCont0146	900	Cluster of sp|K22E_HUMAN| (ZZ_FGCZCont0146)	ZZ_FGCZCont0146 [24]	66 kDa	1	-1.96	1	DOC	notMapped		999				ZZ_FGCZCont0146	tr|Q8H0S3|Q8H0S3_ARATH	Q8H0S3	Q8H0S3_ARATH	0
Scaffold	ZZ_FGCZCont0194	614	sp|CATD_HUMAN|	ZZ_FGCZCont0194 (+1)	45 kDa		-2			mapped	D8QZN2	1000	D8QZN2_SELML	3.60203e-83	tr|D8QZN2|D8QZN2_SELML	ZZ_FGCZCont0194	tr|Q8H0S3|Q8H0S3_ARATH	Q8H0S3	Q8H0S3_ARATH	0
Scaffold	ZZ_FGCZCont0000	89	sp|LYSC_HUMAN|	ZZ_FGCZCont0000 (+1)	17 kDa		-2			notMapped		1001				ZZ_FGCZCont0000	tr|Q8H0S3|Q8H0S3_ARATH	Q8H0S3	Q8H0S3_ARATH	0
Scaffold	tr|E1ZJ09|E1ZJ09_CHLVA	261	Putative uncharacterized protein OS=Chlorella variabilis GN=CHLNCDRAFT_59709 PE=4 SV=1	tr|E1ZJ09|E1ZJ09_CHLVA	26 kDa		-2			mapped	D8R757	1002	D8R757_SELML	1.28143e-122	tr|D8R757|D8R757_SELML	tr|E1ZJ09|E1ZJ09_CHLVA	sp|Q9SHR7|CB21_ARATH	Q9SHR7	CB21_ARATH	1.22009e-116
Scaffold	tr|E1Z239|E1Z239_CHLVA	1123	Putative uncharacterized protein OS=Chlorella variabilis GN=CHLNCDRAFT_56456 PE=4 SV=1	tr|E1Z239|E1Z239_CHLVA	312 kDa		-2			notMapped		1003				tr|E1Z239|E1Z239_CHLVA	tr|F4IP53|F4IP53_ARATH	F4IP53	F4IP53_ARATH	1.46734e-164
Scaffold	tr|D8SBY7|D8SBY7_SELML	482	Cluster of Putative uncharacterized protein OS=Selaginella moellendorffii GN=SELMODRAFT_233607 PE=3 SV=1 (tr|D8SBY7|D8SBY7_SELML)	tr|D8SBY7|D8SBY7_SELML [4]	36 kDa	1	-2	1	DOC	notMapped		1004				tr|D8SBY7|D8SBY7_SELML	tr|Q940K8|Q940K8_ARATH	Q940K8	Q940K8_ARATH	5.01825e-50
Scaffold	tr|D8RGQ5|D8RGQ5_SELML	1019	Putative uncharacterized protein OS=Selaginella moellendorffii GN=SELMODRAFT_411148 PE=4 SV=1	tr|D8RGQ5|D8RGQ5_SELML	93 kDa		-2			notMapped		1005				tr|D8RGQ5|D8RGQ5_SELML	sp|Q9ASR1|EF2_ARATH	Q9ASR1	EF2_ARATH	0
Scaffold	tr|D7LEU2|D7LEU2_ARALL	1113	Binding protein OS=Arabidopsis lyrata subsp. lyrata GN=ARALYDRAFT_481550 PE=4 SV=1	tr|D7LEU2|D7LEU2_ARALL	209 kDa		-2			notMapped		1006				tr|D7LEU2|D7LEU2_ARALL	sp|P46643|AAT1_ARATH	P46643	AAT1_ARATH	0
Scaffold	tr|C0PE42|C0PE42_MAIZE	910	Putative uncharacterized protein OS=Zea mays PE=2 SV=1	tr|C0PE42|C0PE42_MAIZE	66 kDa		-2			notMapped		1007				tr|C0PE42|C0PE42_MAIZE	sp|Q9LM92|SMD3B_ARATH	Q9LM92	SMD3B_ARATH	3.80137e-68
Scaffold	tr|B9HKB1|B9HKB1_POPTR	503	Predicted protein OS=Populus trichocarpa GN=POPTRDRAFT_564885 PE=4 SV=1	tr|B9HKB1|B9HKB1_POPTR	38 kDa		-2			mapped	D8QWD5	1008	D8QWD5_SELML	3.33018e-151	tr|D8QWD5|D8QWD5_SELML	tr|B9HKB1|B9HKB1_POPTR	sp|Q84M96|ALKR2_ARATH	Q84M96	ALKR2_ARATH	8.87692e-136
Scaffold	tr|B9GAQ3|B9GAQ3_ORYSJ	739	6-phosphogluconate dehydrogenase, decarboxylating OS=Oryza sativa subsp. japonica GN=OsJ_33909 PE=3 SV=1	tr|B9GAQ3|B9GAQ3_ORYSJ	52 kDa		-2			mapped	D8RNJ9	1009	D8RNJ9_SELML	0	tr|D8RNJ9|D8RNJ9_SELML	tr|B9GAQ3|B9GAQ3_ORYSJ	sp|Q9FFR3|6PGD3_ARATH	Q9FFR3	6PGD3_ARATH	0
Scaffold	tr|A4S362|A4S362_OSTLU	906	Predicted protein OS=Ostreococcus lucimarinus (strain CCE9901) GN=OSTLU_16917 PE=4 SV=1	tr|A4S362|A4S362_OSTLU	66 kDa		-2			notMapped		1010				tr|A4S362|A4S362_OSTLU	sp|Q9FH02|FTSH5_ARATH	Q9FH02	FTSH5_ARATH	0
Scaffold	sp|Q43058|HEM2_PHYPA	640	Delta-aminolevulinic acid dehydratase, chloroplastic OS=Physcomitrella patens subsp. patens GN=HEMB PE=2 SV=1	sp|Q43058|HEM2_PHYPA (+1)	46 kDa		-2			notMapped		1011				sp|Q43058|HEM2_PHYPA	sp|Q9SFH9|HEM21_ARATH	Q9SFH9	HEM21_ARATH	0
Scaffold	796-1782_3_ORF2	879	>sp|Q8W4M5|PFPB1_ARATH_Pyrophosphate--fructose_6-phosphate_1-phosphotransferase_subunit_beta_1_OS=Arabidopsis_thaliana_GN=PFP-BETA1_PE=2_SV=1|||0	796-1782_3_ORF2	64 kDa		-2			mapped	D8SNS2	1012	D8SNS2_SELML	0	tr|D8SNS2|D8SNS2_SELML	796-1782_3_ORF2	sp|F4JGR5|PFPB2_ARATH	F4JGR5	PFPB2_ARATH	0
Scaffold	77580-286_4_ORF2	2	Cluster of >sp|Q9FM19|HIR1_ARATH_Hypersensitive-induced_response_protein_1_OS=Arabidopsis_thaliana_GN=HIR1_PE=1_SV=1|||3e-20 (77580-286_4_ORF2)	77580-286_4_ORF2 [12]	7 kDa		-2			mapped	D8QTH7	1013	D8QTH7_SELML	3.2166e-14	tr|D8QTH7|D8QTH7_SELML	77580-286_4_ORF2	sp|Q9FM19|HIR1_ARATH	Q9FM19	HIR1_ARATH	7.6716e-16
Scaffold	6451-902_1_ORF2	364	>sp|P31165|RK15_PEA_50S_ribosomal_protein_L15,_chloroplastic_(Fragment)_OS=Pisum_sativum_GN=RPL15_PE=2_SV=1|||1e-95	6451-902_1_ORF2	31 kDa		-2			mapped	D8S7G9	1014	D8S7G9_SELML	5.64998e-84	tr|D8S7G9|D8S7G9_SELML	6451-902_1_ORF2	sp|P25873|RK15_ARATH	P25873	RK15_ARATH	8.87632e-89
Scaffold	55757-340_5_ORF2	189	>sp|O04834|SAR1A_ARATH_GTP-binding_protein_SAR1A_OS=Arabidopsis_thaliana_GN=SAR1A_PE=2_SV=1|||1e-133	55757-340_5_ORF2	22 kDa		-2			mapped	D8SRQ2	1015	D8SRQ2_SELML	1.42994e-121	tr|D8SRQ2|D8SRQ2_SELML	55757-340_5_ORF2	sp|O04834|SAR1A_ARATH	O04834	SAR1A_ARATH	1.66738e-130
Scaffold	555-1993_2_ORF2	832	Cluster of >sp|A9LYC6|PSBB_ACOAM_Photosystem_II_CP47_chlorophyll_apoprotein_OS=Acorus_americanus_GN=psbB_PE=3_SV=1|||0 (555-1993_2_ORF2)	555-1993_2_ORF2 [17]	59 kDa	1	-2	1	DOC	mapped	C7B2H2	1016	C7B2H2_SELML	0	tr|C7B2H2|C7B2H2_SELML	555-1993_2_ORF2	sp|P56777|PSBB_ARATH	P56777	PSBB_ARATH	0
Scaffold	53416-347_4_ORF2	321	>sp|Q39244|RU1A_ARATH_U1_small_nuclear_ribonucleoprotein_A_OS=Arabidopsis_thaliana_GN=U1A_PE=1_SV=1|||5e-13	53416-347_4_ORF2 (+9)	29 kDa		-2			mapped	D8QXZ8	1017	D8QXZ8_SELML	3.9057e-37	tr|D8QXZ8|D8QXZ8_SELML	53416-347_4_ORF2	sp|A1A6K6|NSRA_ARATH	A1A6K6	NSRA_ARATH	3.86078e-28
Scaffold	48417-365_2_ORF2	1022	>sp|O22193|PUB4_ARATH_U-box_domain-containing_protein_4_OS=Arabidopsis_thaliana_GN=PUB4_PE=1_SV=3|||1e-14	48417-365_2_ORF2	93 kDa		-2			mapped	D8T131	1018	D8T131_SELML	2.36598e-16	tr|D8T131|D8T131_SELML	48417-365_2_ORF2	tr|Q8H0U3|Q8H0U3_ARATH	Q8H0U3	Q8H0U3_ARATH	8.71086e-171
Scaffold	4767-1015_1_ORF1	496	>sp|Q76MX2|CAS1_SOLTU_Bifunctional_L-3-cyanoalanine_synthase/cysteine_synthase_1,_mitochondrial_OS=Solanum_tuberosum_GN=PCAS-1_PE=1_SV=1|||2e-175	4767-1015_1_ORF1	38 kDa		-2			mapped	D8RT31	1019	D8RT31_SELML	6.09779e-145	tr|D8RT31|D8RT31_SELML	4767-1015_1_ORF1	sp|Q9S757|CYSC1_ARATH	Q9S757	CYSC1_ARATH	3.6977e-168
Scaffold	40578-399_1_ORF3	128	>sp|Q85FI5|RK16_ADICA_50S_ribosomal_protein_L16,_chloroplastic_OS=Adiantum_capillus-veneris_GN=rpl16_PE=2_SV=1|||2e-87	40578-399_1_ORF3 (+1)	18 kDa		-2			mapped	C7B2I3	1020	C7B2I3_SELML	1.1337e-62	tr|C7B2I3|C7B2I3_SELML	40578-399_1_ORF3	sp|P56793|RK16_ARATH	P56793	RK16_ARATH	1.45694e-70
Scaffold	39871-403_3_ORF2	803	no_acceptable_match|||NA	39871-403_3_ORF2	57 kDa		-2			mapped	D8RQ39	1021	D8RQ39_SELML	1.0635e-96	tr|D8RQ39|D8RQ39_SELML	39871-403_3_ORF2	tr|Q9ZQN9|Q9ZQN9_ARATH	Q9ZQN9	Q9ZQN9_ARATH	1.55485e-110
Scaffold	394016-25_3_ORF1	825	>sp|P43309|PPO_MALDO_Polyphenol_oxidase,_chloroplastic_OS=Malus_domestica_PE=2_SV=1|||6e-125	394016-25_3_ORF1	58 kDa		-2			notMapped		1022				394016-25_3_ORF1	sp|Q9FR53|TOR_ARATH	Q9FR53	TOR_ARATH	4.28015e-40
Scaffold	3271-1179_2_ORF2	542	>sp|Q94A68|Y1669_ARATH_Uncharacterized_oxidoreductase_At1g06690,_chloroplastic_OS=Arabidopsis_thaliana_GN=At1g06690_PE=1_SV=1|||2e-68	3271-1179_2_ORF2	40 kDa		-2			mapped	D8R5J5	1023	D8R5J5_SELML	6.45434e-62	tr|D8R5J5|D8R5J5_SELML	3271-1179_2_ORF2	sp|Q94A68|Y1669_ARATH	Q94A68	Y1669_ARATH	3.95032e-65
Scaffold	312905-61_1_ORF1	101	>sp|Q7XT99|AKR2_ORYSJ_Probable_aldo-keto_reductase_2_OS=Oryza_sativa_subsp._japonica_GN=Os04g0338000_PE=2_SV=2|||3e-66	312905-61_1_ORF1 (+1)	17 kDa		-2			mapped	D8TDU3	1024	D8TDU3_SELML	1.67975e-50	tr|D8TDU3|D8TDU3_SELML	312905-61_1_ORF1	sp|O22707|ALKR3_ARATH	O22707	ALKR3_ARATH	1.36186e-57
Scaffold	31032-455_4_ORF2	117	>sp|B0C921|GCSH_ACAM1_Glycine_cleavage_system_H_protein_OS=Acaryochloris_marina_(strain_MBIC_11017)_GN=gcvH_PE=3_SV=1|||5e-49	31032-455_4_ORF2 (+2)	18 kDa		-2			mapped	D8SC67	1025	D8SC67_SELML	1.9111e-49	tr|D8SC67|D8SC67_SELML	31032-455_4_ORF2	sp|O82179|GCSH2_ARATH	O82179	GCSH2_ARATH	3.86722e-41
Scaffold	30827-456_4_ORF1	878	>sp|P29976|AROF_ARATH_Phospho-2-dehydro-3-deoxyheptonate_aldolase_1,_chloroplastic_OS=Arabidopsis_thaliana_GN=DHS1_PE=2_SV=2|||0	30827-456_4_ORF1	64 kDa		-2			mapped	D8T5J5	1026	D8T5J5_SELML	0	tr|D8T5J5|D8T5J5_SELML	30827-456_4_ORF1	sp|P29976|AROF_ARATH	P29976	AROF_ARATH	0
Scaffold	289581-74_6_ORF2	257	>sp|Q9ZRW8|GSTUJ_ARATH_Glutathione_S-transferase_U19_OS=Arabidopsis_thaliana_GN=GSTU19_PE=2_SV=1|||6e-58	289581-74_6_ORF2	26 kDa		-2			mapped	D8SFL1	1027	D8SFL1_SELML	2.94729e-59	tr|D8SFL1|D8SFL1_SELML	289581-74_6_ORF2	sp|Q9ZRW8|GSTUJ_ARATH	Q9ZRW8	GSTUJ_ARATH	2.1776e-54
Scaffold	250338-99_6_ORF1	449	>sp|Q8H124|Y2446_ARATH_Uncharacterized_protein_At2g34460,_chloroplastic_OS=Arabidopsis_thaliana_GN=At2g34460_PE=1_SV=1|||3e-118	250338-99_6_ORF1 (+1)	35 kDa		-2			mapped	D8S1B2	1028	D8S1B2_SELML	1.26832e-99	tr|D8S1B2|D8S1B2_SELML	250338-99_6_ORF1	sp|Q8H124|Y2446_ARATH	Q8H124	Y2446_ARATH	4.39486e-115
Scaffold	24544-506_1_ORF2	59	>sp|Q9M573|RL31_PERFR_60S_ribosomal_protein_L31_OS=Perilla_frutescens_GN=RPL31_PE=2_SV=1|||2e-69	24544-506_1_ORF2	14 kDa		-2			mapped	D8SF05	1029	D8SF05_SELML	8.81895e-64	tr|D8SF05|D8SF05_SELML	24544-506_1_ORF2	sp|Q9SLL7|RL311_ARATH	Q9SLL7	RL311_ARATH	2.15511e-60
Scaffold	23290-519_3_ORF2	710	>sp|O04905|UMPK_ARATH_UMP/CMP_kinase_OS=Arabidopsis_thaliana_GN=PYR6_PE=1_SV=1|||1e-99	23290-519_3_ORF2	50 kDa		-2			mapped	D8ST91	1030	D8ST91_SELML	8.92563e-98	tr|D8ST91|D8ST91_SELML	23290-519_3_ORF2	sp|O04905|KCY3_ARATH	O04905	KCY3_ARATH	3.0962e-96
Scaffold	231379-112_5_ORF3	876	>sp|Q966L9|GLH2_CAEEL_ATP-dependent_RNA_helicase_glh-2_OS=Caenorhabditis_elegans_GN=glh-2_PE=1_SV=1|||2e-05	231379-112_5_ORF3 (+1)	63 kDa		-2			mapped	D8SFS0	1031	D8SFS0_SELML	4.0891e-13	tr|D8SFS0|D8SFS0_SELML	231379-112_5_ORF3	tr|F4K6F8|F4K6F8_ARATH	F4K6F8	F4K6F8_ARATH	4.24254e-32
Scaffold	201081-137_2_ORF1	665	>sp|Q99JB2|STML2_MOUSE_Stomatin-like_protein_2_OS=Mus_musculus_GN=Stoml2_PE=1_SV=1|||9e-110	201081-137_2_ORF1	47 kDa		-2			mapped	D8QNF6	1032	D8QNF6_SELML	7.17525e-135	tr|D8QNF6|D8QNF6_SELML	201081-137_2_ORF1	tr|Q93VP9|Q93VP9_ARATH	Q93VP9	Q93VP9_ARATH	1.70221e-155
Scaffold	195820-141_3_ORF1	591	>sp|Q7XR06|P2C45_ORYSJ_Probable_protein_phosphatase_2C_45_OS=Oryza_sativa_subsp._japonica_GN=Os04g0659500_PE=2_SV=2|||3e-45	195820-141_3_ORF1 (+1)	43 kDa		-2			mapped	D8SQA0	1033	D8SQA0_SELML	9.95827e-138	tr|D8SQA0|D8SQA0_SELML	195820-141_3_ORF1	sp|Q8VZN9|P2C11_ARATH	Q8VZN9	P2C11_ARATH	8.90361e-39
Scaffold	195110-142_1_ORF1	366	>sp|Q5EA79|GALM_BOVIN_Aldose_1-epimerase_OS=Bos_taurus_GN=GALM_PE=2_SV=1|||2e-76	195110-142_1_ORF1 (+2)	31 kDa		-2			mapped	D8SZU0	1034	D8SZU0_SELML	2.02549e-96	tr|D8SZU0|D8SZU0_SELML	195110-142_1_ORF1	tr|Q9LVH6|Q9LVH6_ARATH	Q9LVH6	Q9LVH6_ARATH	2.45041e-93
Scaffold	186952-149_4_ORF2	1060	>sp|Q9ZPY7|XPO2_ARATH_Exportin-2_OS=Arabidopsis_thaliana_GN=CAS_PE=1_SV=1|||0	186952-149_4_ORF2	109 kDa		-2			mapped	D8QRW5	1035	D8QRW5_SELML	0	tr|D8QRW5|D8QRW5_SELML	186952-149_4_ORF2	sp|Q9ZPY7|XPO2_ARATH	Q9ZPY7	XPO2_ARATH	0
Scaffold	186533-150_2_ORF1	425	>sp|Q93XM7|MCAT_ARATH_Mitochondrial_carnitine/acylcarnitine_carrier-like_protein_OS=Arabidopsis_thaliana_GN=BOU_PE=1_SV=1|||1e-161	186533-150_2_ORF1	33 kDa		-2			mapped	D8SRL7	1036	D8SRL7_SELML	9.64034e-146	tr|D8SRL7|D8SRL7_SELML	186533-150_2_ORF1	sp|Q93XM7|MCAT_ARATH	Q93XM7	MCAT_ARATH	9.29794e-159
Scaffold	183718-152_6_ORF1	960	>sp|Q7TP47|HNRPQ_RAT_Heterogeneous_nuclear_ribonucleoprotein_Q_OS=Rattus_norvegicus_GN=Syncrip_PE=2_SV=1|||9e-40	183718-152_6_ORF1 (+22)	76 kDa		-2			notMapped		1037				183718-152_6_ORF1	tr|Q0WNX3|Q0WNX3_ARATH	Q0WNX3	Q0WNX3_ARATH	9.4887e-18
Scaffold	183259-153_3_ORF2	759	>sp|P93836|HPPD_ARATH_4-hydroxyphenylpyruvate_dioxygenase_OS=Arabidopsis_thaliana_GN=HPD_PE=1_SV=2|||0	183259-153_3_ORF2	53 kDa		-2			mapped	D8RUV1	1038	D8RUV1_SELML	0	tr|D8RUV1|D8RUV1_SELML	183259-153_3_ORF2	sp|P93836|HPPD_ARATH	P93836	HPPD_ARATH	0
Scaffold	182505-154_4_ORF1	223	>sp|P13917|7SB1_SOYBN_Basic_7S_globulin_OS=Glycine_max_GN=BG_PE=1_SV=2|||2e-25	182505-154_4_ORF1	24 kDa		-2			mapped	D8QXE9	1039	D8QXE9_SELML	3.30792e-35	tr|D8QXE9|D8QXE9_SELML	182505-154_4_ORF1	tr|Q9ZVS4|Q9ZVS4_ARATH	Q9ZVS4	Q9ZVS4_ARATH	1.65987e-55
Scaffold	17879-586_6_ORF2	653	>sp|Q9FL28|FLS2_ARATH_LRR_receptor-like_serine/threonine-protein_kinase_FLS2_OS=Arabidopsis_thaliana_GN=FLS2_PE=1_SV=1|||1e-50	17879-586_6_ORF2 (+2)	47 kDa		-2			mapped	D8QTT1	1040	D8QTT1_SELML	1.36385e-78	tr|D8QTT1|D8QTT1_SELML	17879-586_6_ORF2	sp|Q9FL28|FLS2_ARATH	Q9FL28	FLS2_ARATH	2.98133e-47
Scaffold	175551-161_1_ORF2	986	>sp|Q42523|MCCA_ARATH_Methylcrotonoyl-CoA_carboxylase_subunit_alpha,_mitochondrial_OS=Arabidopsis_thaliana_GN=MCCA_PE=1_SV=2|||0	175551-161_1_ORF2	84 kDa		-2			mapped	D8RIZ0	1041	D8RIZ0_SELML	0	tr|D8RIZ0|D8RIZ0_SELML	175551-161_1_ORF2	sp|Q42523|MCCA_ARATH	Q42523	MCCA_ARATH	0
Scaffold	1739-1468_2_ORF2	615	>sp|Q9UQ80|PA2G4_HUMAN_Proliferation-associated_protein_2G4_OS=Homo_sapiens_GN=PA2G4_PE=1_SV=3|||1e-116	1739-1468_2_ORF2	45 kDa		-2			mapped	D8SXZ2	1042	D8SXZ2_SELML	0	tr|D8SXZ2|D8SXZ2_SELML	1739-1468_2_ORF2	sp|Q96327|EBP1_ARATH	Q96327	EBP1_ARATH	0
Scaffold	168-2720_4_ORF2	966	>sp|Q39102|FTSH1_ARATH_ATP-dependent_zinc_metalloprotease_FTSH_1,_chloroplastic_OS=Arabidopsis_thaliana_GN=FTSH1_PE=1_SV=2|||0	168-2720_4_ORF2	77 kDa		-2			mapped	D8QR57	1043	D8QR57_SELML	0	tr|D8QR57|D8QR57_SELML	168-2720_4_ORF2	sp|Q9FH02|FTSH5_ARATH	Q9FH02	FTSH5_ARATH	0
Scaffold	159861-180_1_ORF1	1105	>sp|Q54BW4|CPAS2_DICDI_Circularly_permutated_Ras_protein_2_OS=Dictyostelium_discoideum_GN=cpras2_PE=3_SV=1|||5e-88	159861-180_1_ORF1 (+2)	166 kDa		-2			notMapped		1044				159861-180_1_ORF1	sp|Q494P0|PHT17_ARATH	Q494P0	PHT17_ARATH	0
Scaffold	152055-193_3_ORF2	954	>sp|Q9FZD1|PPR58_ARATH_Pentatricopeptide_repeat-containing_protein_At1g26460,_mitochondrial_OS=Arabidopsis_thaliana_GN=At1g26460_PE=1_SV=1|||6e-84	152055-193_3_ORF2	75 kDa		-2			mapped	D8RLK2	1045	D8RLK2_SELML	9.63976e-12	tr|D8RLK2|D8RLK2_SELML	152055-193_3_ORF2	sp|Q9FZD1|PPR58_ARATH	Q9FZD1	PPR58_ARATH	1.18607e-80
Scaffold	14802-632_1_ORF1	871	>sp|P92994|TCMO_ARATH_Trans-cinnamate_4-monooxygenase_OS=Arabidopsis_thaliana_GN=CYP73A5_PE=2_SV=1|||0	14802-632_1_ORF1 (+1)	63 kDa		-2			notMapped		1046				14802-632_1_ORF1	sp|Q9LKA4|UBA2C_ARATH	Q9LKA4	UBA2C_ARATH	1.09362e-79
Scaffold	13443-661_1_ORF2	602	>sp|Q9SXP2|FDH1_ORYSJ_Formate_dehydrogenase_1,_mitochondrial_OS=Oryza_sativa_subsp._japonica_GN=Os06g0486800_PE=1_SV=2|||0	13443-661_1_ORF2 (+1)	44 kDa		-2			mapped	D8SPB4	1047	D8SPB4_SELML	0	tr|D8SPB4|D8SPB4_SELML	13443-661_1_ORF2	tr|A0A1P8B9L1|A0A1P8B9L1_ARATH	A0A1P8B9L1	A0A1P8B9L1_ARATH	0
Scaffold	108954-238_4_ORF1	819	>sp|P25526|GABD_ECOLI_Succinate-semialdehyde_dehydrogenase_[NADP(+)]_GabD_OS=Escherichia_coli_(strain_K12)_GN=gabD_PE=1_SV=1|||0	108954-238_4_ORF1 (+1)	58 kDa		-2			mapped	D8QTT0	1048	D8QTT0_SELML	0	tr|D8QTT0|D8QTT0_SELML	108954-238_4_ORF1	sp|Q9SAK4|SSDH_ARATH	Q9SAK4	SSDH_ARATH	0
Scaffold	104606-243_6_ORF2	308	>sp|Q25AG5|ERG3_ORYSI_Elicitor-responsive_protein_3_OS=Oryza_sativa_subsp._indica_GN=ERG3_PE=2_SV=1|||2e-35	104606-243_6_ORF2	28 kDa		-2			mapped	D8SM78	1049	D8SM78_SELML	8.0245e-26	tr|D8SM78|D8SM78_SELML	104606-243_6_ORF2	sp|Q9C8S6|PP16B_ARATH	Q9C8S6	PP16B_ARATH	5.14927e-30
Scaffold	316777-59_1_ORF2	1089	>sp|Q6ZY51|PWD_ARATH_Phosphoglucan,_water_dikinase,_chloroplastic_OS=Arabidopsis_thaliana_GN=GWD3_PE=1_SV=1|||0	316777-59_1_ORF2	135 kDa	1	-2.08	1	DOC	mapped	D8RQ33	1050	D8RQ33_SELML	0	tr|D8RQ33|D8RQ33_SELML	316777-59_1_ORF2	sp|Q6ZY51|PWD_ARATH	Q6ZY51	PWD_ARATH	0
Scaffold	163370-176_3_ORF2	1002	Cluster of >sp|Q9FJ62|GLPQ1_ARATH_Probable_glycerophosphoryl_diester_phosphodiesterase_1_OS=Arabidopsis_thaliana_GN=GPDL1_PE=1_SV=1|||1e-158 (163370-176_3_ORF2)	163370-176_3_ORF2 [2]	88 kDa	1	-2.09	1	DOC	mapped	D8RRS4	1051	D8RRS4_SELML	6.8548e-143	tr|D8RRS4|D8RRS4_SELML	163370-176_3_ORF2	sp|Q9LVN0|GPDL7_ARATH	Q9LVN0	GPDL7_ARATH	5.97722e-158
Scaffold	92126-261_3_ORF1	327	Cluster of >sp|P12328|CB21_LEMGI_Chlorophyll_a-b_binding_protein_of_LHCII_type_I,_chloroplastic_OS=Lemna_gibba_PE=3_SV=1|||3e-170 (92126-261_3_ORF1)	92126-261_3_ORF1 [12]	29 kDa	1	-2.17	1	DOC	notMapped		1052				92126-261_3_ORF1	sp|P42732|RR13_ARATH	P42732	RR13_ARATH	1.13915e-53
Scaffold	345350-46_5_ORF2	1100	Cluster of >sp|A5PK39|TPP2_BOVIN_Tripeptidyl-peptidase_2_OS=Bos_taurus_GN=TPP2_PE=2_SV=1|||0 (345350-46_5_ORF2)	345350-46_5_ORF2 [7]	152 kDa	1	-2.17	1	DOC	mapped	D8R7G9	1053	D8R7G9_SELML	0	tr|D8R7G9|D8R7G9_SELML	345350-46_5_ORF2	sp|F4JVN6|TPPII_ARATH	F4JVN6	TPPII_ARATH	0
Scaffold	272765-85_1_ORF2	604	>sp|Q43086|PYRB1_PEA_Aspartate_carbamoyltransferase_1,_chloroplastic_OS=Pisum_sativum_GN=PYRB1_PE=2_SV=1|||0	272765-85_1_ORF2	44 kDa	1	-2.17	1	DOC	mapped	D8T0T6	1054	D8T0T6_SELML	0	tr|D8T0T6|D8T0T6_SELML	272765-85_1_ORF2	sp|P49077|PYRB_ARATH	P49077	PYRB_ARATH	0
Scaffold	304418-66_1_ORF2	188	>sp|Q836D5|Y1180_ENTFA_UPF0337_protein_EF_1180_OS=Enterococcus_faecalis_(strain_ATCC_700802_/_V583)_GN=EF_1180_PE=3_SV=1|||1e-07	304418-66_1_ORF2	22 kDa	1	-2.26	1	DOC	mapped	D8RHB7	1055	D8RHB7_SELML	1.97829e-16	tr|D8RHB7|D8RHB7_SELML	304418-66_1_ORF2	tr|Q9SUB2|Q9SUB2_ARATH	Q9SUB2	Q9SUB2_ARATH	0.000101808
Scaffold	ZZ_FGCZCont0118	801	sp|KRHB2_HUMAN|	ZZ_FGCZCont0118 (+1)	57 kDa	1	-2.32	1	DOC	notMapped		1056				ZZ_FGCZCont0118	tr|Q8H0S3|Q8H0S3_ARATH	Q8H0S3	Q8H0S3_ARATH	0
Scaffold	tr|E1ZAY6|E1ZAY6_CHLVA	370	Putative uncharacterized protein OS=Chlorella variabilis GN=CHLNCDRAFT_48679 PE=4 SV=1	tr|E1ZAY6|E1ZAY6_CHLVA	31 kDa	1	-2.32	1	DOC	notMapped		1057				tr|E1ZAY6|E1ZAY6_CHLVA	noOrthologue	noOrthologue	noOrthologue	notMapped
Scaffold	tr|D8RRD1|D8RRD1_SELML	491	Putative uncharacterized protein OS=Selaginella moellendorffii GN=SELMODRAFT_232133 PE=3 SV=1	tr|D8RRD1|D8RRD1_SELML (+1)	37 kDa	1	-2.32	1	DOC	mapped	D8RRD1	1058	D8RRD1_SELML	0	tr|D8RRD1|D8RRD1_SELML	tr|D8RRD1|D8RRD1_SELML	sp|Q9MA79|F16P2_ARATH	Q9MA79	F16P2_ARATH	0
Scaffold	tr|D7RTK6|D7RTK6_AEGTA	937	Cluster of High molecular weight glutenin subunit 1Dy11*t OS=Aegilops tauschii PE=4 SV=1 (tr|D7RTK6|D7RTK6_AEGTA)	tr|D7RTK6|D7RTK6_AEGTA [12]	70 kDa	1	-2.32	1	DOC	notMapped		1059				tr|D7RTK6|D7RTK6_AEGTA	noOrthologue	noOrthologue	noOrthologue	notMapped
Scaffold	tr|A9T7K4|A9T7K4_PHYPA	21	Cluster of Predicted protein OS=Physcomitrella patens subsp. patens GN=PHYPADRAFT_110253 PE=4 SV=1 (tr|A9T7K4|A9T7K4_PHYPA)	tr|A9T7K4|A9T7K4_PHYPA [7]	11 kDa	1	-2.32	1	DOC	mapped	D8QP64	1060	D8QP64_SELML	8.07525e-41	tr|D8QP64|D8QP64_SELML	tr|A9T7K4|A9T7K4_PHYPA	sp|Q9XGX9|TIM9_ARATH	Q9XGX9	TIM9_ARATH	7.74104e-44
Scaffold	sp|Q8H107-2|ODO2B_ARATH	712	Isoform 2 of Dihydrolipoyllysine-residue succinyltransferase component of 2-oxoglutarate dehydrogenase complex 2, mitochondrial OS=Arabidopsis thaliana GN=At4g26910	sp|Q8H107-2|ODO2B_ARATH (+3)	50 kDa	1	-2.32	1	DOC	mapped	D8QQW2	1061	D8QQW2_SELML	2.97212e-174	tr|D8QQW2|D8QQW2_SELML	sp|Q8H107-2|ODO2B_ARATH	sp|Q8H107|ODO2B_ARATH	Q8H107	ODO2B_ARATH	0
Scaffold	sp|P27736|SSG1_WHEAT	914	Granule-bound starch synthase 1, chloroplastic/amyloplastic OS=Triticum aestivum GN=WAXY PE=1 SV=1	sp|P27736|SSG1_WHEAT (+32)	68 kDa	1	-2.32	1	DOC	notMapped		1062				sp|P27736|SSG1_WHEAT	sp|P27323|HS901_ARATH	P27323	HS901_ARATH	0
Scaffold	rr|REV_G7KAN4|REV_G7KAN4_MEDTR	1043	Integrin-linked protein kinase OS=Medicago truncatula GN=MTR_5g009600 PE=4 SV=1	rr|REV_G7KAN4|REV_G7KAN4_MEDTR	102 kDa	1	-2.32	1	DOC	notMapped		1063				rr|REV_G7KAN4|REV_G7KAN4_MEDTR	tr|Q9SKZ0|Q9SKZ0_ARATH	Q9SKZ0	Q9SKZ0_ARATH	4.18317e-48
Scaffold	420749-13_5_ORF1	616	>sp|Q8RVH5|7SBG2_SOYBN_Basic_7S_globulin_2_OS=Glycine_max_PE=1_SV=1|||1e-25	420749-13_5_ORF1	45 kDa	1	-2.32	1	DOC	mapped	D8QXE9	1064	D8QXE9_SELML	8.06206e-55	tr|D8QXE9|D8QXE9_SELML	420749-13_5_ORF1	tr|Q9ZVS4|Q9ZVS4_ARATH	Q9ZVS4	Q9ZVS4_ARATH	2.07448e-54
Scaffold	416362-16_5_ORF3	428	>sp|Q8L7W2|NUDT8_ARATH_Nudix_hydrolase_8_OS=Arabidopsis_thaliana_GN=NUDT8_PE=2_SV=2|||2e-95	416362-16_5_ORF3 (+3)	34 kDa	1	-2.32	1	DOC	mapped	D8S3E0	1065	D8S3E0_SELML	1.33432e-102	tr|D8S3E0|D8S3E0_SELML	416362-16_5_ORF3	sp|Q8L7W2|NUDT8_ARATH	Q8L7W2	NUDT8_ARATH	2.86086e-92
Scaffold	415476-17_5_ORF2	772	>sp|A6UVT6|LADH_META3_Lactaldehyde_dehydrogenase_OS=Methanococcus_aeolicus_(strain_Nankai-3_/_ATCC_BAA-1280)_GN=Maeo_1030_PE=3_SV=1|||1e-111	415476-17_5_ORF2 (+1)	54 kDa	1	-2.32	1	DOC	mapped	D8SGK9	1066	D8SGK9_SELML	0	tr|D8SGK9|D8SGK9_SELML	415476-17_5_ORF2	sp|Q9SAK4|SSDH_ARATH	Q9SAK4	SSDH_ARATH	1.30688e-86
Scaffold	406658-21_2_ORF1	133	>sp|B2X050|MNR1_CAPAN_(+)-neomenthol_dehydrogenase_OS=Capsicum_annuum_GN=MNR1_PE=1_SV=1|||1e-46	406658-21_2_ORF1	19 kDa	1	-2.32	1	DOC	mapped	D8SIE0	1067	D8SIE0_SELML	1.3755e-59	tr|D8SIE0|D8SIE0_SELML	406658-21_2_ORF1	tr|Q9FI45|Q9FI45_ARATH	Q9FI45	Q9FI45_ARATH	5.8985e-55
Scaffold	350835-43_1_ORF1	412	>sp|Q9FRL8|DHAR2_ARATH_Glutathione_S-transferase_DHAR2_OS=Arabidopsis_thaliana_GN=DHAR2_PE=1_SV=1|||4e-61	350835-43_1_ORF1	33 kDa	1	-2.32	1	DOC	mapped	D8R7A3	1068	D8R7A3_SELML	7.41323e-116	tr|D8R7A3|D8R7A3_SELML	350835-43_1_ORF1	sp|Q9FRL8|DHAR2_ARATH	Q9FRL8	DHAR2_ARATH	1.74434e-57
Scaffold	345808-45_2_ORF2	887	>sp|Q70XE6|6FEH_BETVU_Fructan_6-exohydrolase_OS=Beta_vulgaris_GN=6-FEH_PE=1_SV=1|||0	345808-45_2_ORF2	65 kDa	1	-2.32	1	DOC	mapped	D8RQ30	1069	D8RQ30_SELML	0	tr|D8RQ30|D8RQ30_SELML	345808-45_2_ORF2	sp|Q43866|INV1_ARATH	Q43866	INV1_ARATH	0
Scaffold	33300-438_2_ORF2	472	>sp|P27522|CB13_SOLLC_Chlorophyll_a-b_binding_protein_8,_chloroplastic_OS=Solanum_lycopersicum_GN=CAB8_PE=3_SV=1|||6e-146	33300-438_2_ORF2	36 kDa	1	-2.32	1	DOC	mapped	D8T2F6	1070	D8T2F6_SELML	8.86744e-144	tr|D8T2F6|D8T2F6_SELML	33300-438_2_ORF2	sp|Q9SY97|LHCA3_ARATH	Q9SY97	LHCA3_ARATH	3.88867e-140
Scaffold	309649-63_3_ORF2	981	>sp|Q9SSG3|HIPL1_ARATH_HIPL1_protein_OS=Arabidopsis_thaliana_GN=HIPL1_PE=1_SV=2|||0	309649-63_3_ORF2	83 kDa	1	-2.32	1	DOC	mapped	D8RMA8	1071	D8RMA8_SELML	0	tr|D8RMA8|D8RMA8_SELML	309649-63_3_ORF2	sp|Q9SSG3|HIPL1_ARATH	Q9SSG3	HIPL1_ARATH	0
Scaffold	2925-1225_1_ORF2	197	>sp|Q52563|STBA_PSEUB_Resolvase_OS=Pseudomonas_syringae_pv._tomato_GN=stbA_PE=3_SV=1|||2e-05	2925-1225_1_ORF2	23 kDa	1	-2.32	1	DOC	notMapped		1072				2925-1225_1_ORF2	noOrthologue	noOrthologue	noOrthologue	notMapped
Scaffold	288503-75_4_ORF2	161	>sp|P62302|RS13_SOYBN_40S_ribosomal_protein_S13_OS=Glycine_max_GN=RPS13_PE=2_SV=1|||1e-101	288503-75_4_ORF2	21 kDa	1	-2.32	1	DOC	mapped	D8REI3	1073	D8REI3_SELML	1.39309e-96	tr|D8REI3|D8REI3_SELML	288503-75_4_ORF2	sp|P59224|RS132_ARATH	P59224	RS132_ARATH	6.56336e-96
Scaffold	2497-1288_5_ORF2	67	>sp|Q85FH8|RK21_ADICA_50S_ribosomal_protein_L21,_chloroplastic_OS=Adiantum_capillus-veneris_GN=rpl21_PE=2_SV=2|||2e-36	2497-1288_5_ORF2	15 kDa	1	-2.32	1	DOC	notMapped		1074				2497-1288_5_ORF2	noOrthologue	noOrthologue	noOrthologue	notMapped
Scaffold	249504-100_3_ORF2	399	>sp|Q9C8L4|GLO2O_ARATH_Hydroxyacylglutathione_hydrolase_3,_mitochondrial_OS=Arabidopsis_thaliana_GN=GLY3_PE=1_SV=3|||1e-147	249504-100_3_ORF2	32 kDa	1	-2.32	1	DOC	mapped	D8QRE5	1075	D8QRE5_SELML	5.29727e-145	tr|D8QRE5|D8QRE5_SELML	249504-100_3_ORF2	sp|Q9C8L4|ETHE1_ARATH	Q9C8L4	ETHE1_ARATH	9.92486e-145
Scaffold	21101-543_5_ORF2	208	>sp|Q9FLN4|RK27_ARATH_50S_ribosomal_protein_L27,_chloroplastic_OS=Arabidopsis_thaliana_GN=RPL27_PE=2_SV=1|||1e-65	21101-543_5_ORF2	23 kDa	1	-2.32	1	DOC	mapped	D8SWX8	1076	D8SWX8_SELML	1.12786e-60	tr|D8SWX8|D8SWX8_SELML	21101-543_5_ORF2	sp|Q9FLN4|RK27_ARATH	Q9FLN4	RK27_ARATH	4.50132e-62
Scaffold	20898-546_1_ORF2	63	>sp|Q9LUT9|FB150_ARATH_F-box_protein_At3g17320_OS=Arabidopsis_thaliana_GN=At3g17320_PE=2_SV=2|||2e-07	20898-546_1_ORF2	15 kDa	1	-2.32	1	DOC	notMapped		1077				20898-546_1_ORF2	noOrthologue	noOrthologue	noOrthologue	notMapped
Scaffold	140576-206_2_ORF2	110	no_acceptable_match|||NA	140576-206_2_ORF2	17 kDa	1	-2.32	1	DOC	mapped	D8RPH2	1078	D8RPH2_SELML	2.44148e-39	tr|D8RPH2|D8RPH2_SELML	140576-206_2_ORF2	sp|Q9C8S6|PP16B_ARATH	Q9C8S6	PP16B_ARATH	1.48086e-27
Scaffold	12129-692_4_ORF2	295	>sp|P27489|CB23_SOLLC_Chlorophyll_a-b_binding_protein_13,_chloroplastic_OS=Solanum_lycopersicum_GN=CAB13_PE=1_SV=1|||4e-126	12129-692_4_ORF2	28 kDa	1	-2.32	1	DOC	mapped	D8R5M3	1079	D8R5M3_SELML	6.91357e-124	tr|D8R5M3|D8R5M3_SELML	12129-692_4_ORF2	sp|Q9S7M0|CB3_ARATH	Q9S7M0	CB3_ARATH	1.26049e-116
Scaffold	145362-202_3_ORF2	174	>sp|Q9LR64|Y1360_ARATH_Thylakoid_lumenal_protein_At1g03610,_chloroplastic_OS=Arabidopsis_thaliana_GN=At1g03600_PE=1_SV=1|||6e-45	145362-202_3_ORF2 (+1)	21 kDa	1	-2.46	1	DOC	mapped	D8QT53	1080	D8QT53_SELML	3.10725e-46	tr|D8QT53|D8QT53_SELML	145362-202_3_ORF2	sp|Q9LR64|PB27A_ARATH	Q9LR64	PB27A_ARATH	4.14581e-41
Scaffold	281637-79_2_ORF2	108	>sp|Q01417|PM1_SOYBN_18_kDa_seed_maturation_protein_OS=Glycine_max_GN=GMPM1_PE=2_SV=1|||3e-10	281637-79_2_ORF2 (+1)	17 kDa	1	-2.52	1	DOC	mapped	D8QXJ5	1081	D8QXJ5_SELML	4.76543e-12	tr|D8QXJ5|D8QXJ5_SELML	281637-79_2_ORF2	sp|Q39138|LEA6_ARATH	Q39138	LEA6_ARATH	2.65719e-05
Scaffold	tr|C1EA64|C1EA64_MICSR	869	Aminopeptidase OS=Micromonas sp. (strain RCC299 / NOUM17) GN=MICPUN_59962 PE=4 SV=1	tr|C1EA64|C1EA64_MICSR	63 kDa	1	-2.58	1	DOC	notMapped		1082				tr|C1EA64|C1EA64_MICSR	tr|Q9M1U1|Q9M1U1_ARATH	Q9M1U1	Q9M1U1_ARATH	9.29346e-47
Scaffold	tr|A9SF41|A9SF41_PHYPA	490	Predicted protein OS=Physcomitrella patens subsp. patens GN=PHYPADRAFT_234776 PE=3 SV=1	tr|A9SF41|A9SF41_PHYPA	37 kDa	1	-2.58	1	DOC	notMapped		1083				tr|A9SF41|A9SF41_PHYPA	sp|Q9SKQ0|CP19B_ARATH	Q9SKQ0	CP19B_ARATH	2.23601e-90
Scaffold	80596-281_5_ORF2	1014	>sp|O81643|VILI1_ARATH_Villin-1_OS=Arabidopsis_thaliana_GN=VLN1_PE=2_SV=2|||0	80596-281_5_ORF2	92 kDa	1	-2.58	1	DOC	mapped	D8S7L1	1084	D8S7L1_SELML	0	tr|D8S7L1|D8S7L1_SELML	80596-281_5_ORF2	sp|O81644|VILI2_ARATH	O81644	VILI2_ARATH	0
Scaffold	80360-281_6_ORF2	297	>sp|Q9M060|IF62_ARATH_Eukaryotic_translation_initiation_factor_6-2_OS=Arabidopsis_thaliana_GN=EIF6-2_PE=2_SV=1|||1e-156	80360-281_6_ORF2	28 kDa	1	-2.58	1	DOC	mapped	D8T0Y2	1085	D8T0Y2_SELML	7.13531e-162	tr|D8T0Y2|D8T0Y2_SELML	80360-281_6_ORF2	sp|Q9M060|IF62_ARATH	Q9M060	IF62_ARATH	1.33911e-153
Scaffold	75984-289_5_ORF1	171	>sp|A9TND9|CYNS_PHYPA_Cyanate_hydratase_OS=Physcomitrella_patens_subsp._patens_GN=CYN_PE=3_SV=1|||7e-71	75984-289_5_ORF1	21 kDa	1	-2.58	1	DOC	mapped	D8SRE7	1086	D8SRE7_SELML	9.10499e-54	tr|D8SRE7|D8SRE7_SELML	75984-289_5_ORF1	sp|O22683|CYNS_ARATH	O22683	CYNS_ARATH	3.9746e-58
Scaffold	424385-10_3_ORF1	71	>sp|Q3L181|PERR_RAUSE_Perakine_reductase_OS=Rauvolfia_serpentina_GN=PR_PE=1_SV=1|||1e-53	424385-10_3_ORF1	15 kDa	1	-2.58	1	DOC	mapped	D8RU64	1087	D8RU64_SELML	1.22995e-66	tr|D8RU64|D8RU64_SELML	424385-10_3_ORF1	sp|O22707|ALKR3_ARATH	O22707	ALKR3_ARATH	6.35444e-44
Scaffold	339088-48_3_ORF2	868	>sp|P43309|PPO_MALDO_Polyphenol_oxidase,_chloroplastic_OS=Malus_domestica_PE=2_SV=1|||8e-117	339088-48_3_ORF2	63 kDa	1	-2.58	1	DOC	mapped	D8RTL3	1088	D8RTL3_SELML	3.89997e-125	tr|D8RTL3|D8RTL3_SELML	339088-48_3_ORF2	noOrthologue	noOrthologue	noOrthologue	notMapped
Scaffold	272061-85_1_ORF1	860	>sp|P40781|CYPR4_CYNCA_Protein_CYPRO4_OS=Cynara_cardunculus_GN=CYPRO4_PE=2_SV=1|||0	272061-85_1_ORF1 (+1)	62 kDa	1	-2.58	1	DOC	mapped	D8SC28	1089	D8SC28_SELML	0	tr|D8SC28|D8SC28_SELML	272061-85_1_ORF1	tr|Q9LJK5|Q9LJK5_ARATH	Q9LJK5	Q9LJK5_ARATH	0
Scaffold	223740-118_3_ORF2	228	>sp|Q6I544|GL52_ORYSJ_Germin-like_protein_5-1_OS=Oryza_sativa_subsp._japonica_GN=Os05g0277500_PE=2_SV=1|||5e-75	223740-118_3_ORF2	24 kDa	1	-2.58	1	DOC	mapped	D8R272	1090	D8R272_SELML	2.51347e-58	tr|D8R272|D8R272_SELML	223740-118_3_ORF2	sp|P94014|GL21_ARATH	P94014	GL21_ARATH	1.18342e-68
Scaffold	167942-169_1_ORF2	476	no_acceptable_match|||NA	167942-169_1_ORF2	36 kDa	1	-2.58	1	DOC	mapped	D8QRG8	1091	D8QRG8_SELML	7.15361e-105	tr|D8QRG8|D8QRG8_SELML	167942-169_1_ORF2	sp|Q9LSP0|PER29_ARATH	Q9LSP0	PER29_ARATH	8.46546e-91
Scaffold	1607-1505_6_ORF1	528	>sp|A9X7L0|ANMT_RUTGR_Anthranilate_N-methyltransferase_OS=Ruta_graveolens_PE=1_SV=1|||2e-69	1607-1505_6_ORF1	39 kDa	1	-2.58	1	DOC	mapped	D8QX33	1092	D8QX33_SELML	2.45414e-70	tr|D8QX33|D8QX33_SELML	1607-1505_6_ORF1	sp|Q9FK25|OMT1_ARATH	Q9FK25	OMT1_ARATH	1.09086e-60
Scaffold	108532-239_2_ORF2	567	>sp|A9RY03|NNRD_PHYPA_ATP-dependent_(S)-NAD(P)H-hydrate_dehydratase_OS=Physcomitrella_patens_subsp._patens_GN=PHYPADRAFT_121160_PE=3_SV=1|||1e-152	108532-239_2_ORF2	42 kDa	1	-2.58	1	DOC	mapped	D8SAK9	1093	D8SAK9_SELML	1.3039e-134	tr|D8SAK9|D8SAK9_SELML	108532-239_2_ORF2	sp|Q94AF2|NNRD_ARATH	Q94AF2	NNRD_ARATH	3.27985e-131
Scaffold	420882-13_1_ORF2	922	>sp|Q94C59|PATL4_ARATH_Patellin-4_OS=Arabidopsis_thaliana_GN=PATL4_PE=1_SV=2|||6e-126	420882-13_1_ORF2	68 kDa	1	-2.66	1	DOC	mapped	D8RE23	1094	D8RE23_SELML	3.36369e-141	tr|D8RE23|D8RE23_SELML	420882-13_1_ORF2	sp|Q94C59|PATL4_ARATH	Q94C59	PATL4_ARATH	5.07149e-123
Scaffold	tr|F6H2C7|F6H2C7_VITVI	1087	Putative uncharacterized protein OS=Vitis vinifera GN=VIT_19s0014g05200 PE=4 SV=1	tr|F6H2C7|F6H2C7_VITVI	133 kDa	1	-2.81	1	DOC	notMapped		1095				tr|F6H2C7|F6H2C7_VITVI	sp|Q8H103|G6PIP_ARATH	Q8H103	G6PIP_ARATH	0
Scaffold	tr|D8RPE1|D8RPE1_SELML	1034	Putative uncharacterized protein OS=Selaginella moellendorffii GN=SELMODRAFT_228162 PE=4 SV=1	tr|D8RPE1|D8RPE1_SELML (+1)	97 kDa	1	-2.81	1	DOC	mapped	D8RPE1	1096	D8RPE1_SELML	0	tr|D8RPE1|D8RPE1_SELML	tr|D8RPE1|D8RPE1_SELML	sp|Q9SIV2|PSD2A_ARATH	Q9SIV2	PSD2A_ARATH	0
Scaffold	tr|D7LIN4|D7LIN4_ARALL	770	Attim44-2 OS=Arabidopsis lyrata subsp. lyrata GN=ARALYDRAFT_482583 PE=4 SV=1	tr|D7LIN4|D7LIN4_ARALL	54 kDa	1	-2.81	1	DOC	notMapped		1097				tr|D7LIN4|D7LIN4_ARALL	sp|P21238|CPNA1_ARATH	P21238	CPNA1_ARATH	0
Scaffold	60694-325_4_ORF2	1077	>sp|Q9LIB2|PHS1_ARATH_Alpha-glucan_phosphorylase_1_OS=Arabidopsis_thaliana_GN=PHS1_PE=1_SV=1|||0	60694-325_4_ORF2 (+1)	117 kDa	1	-2.81	1	DOC	mapped	D8RLY7	1098	D8RLY7_SELML	0	tr|D8RLY7|D8RLY7_SELML	60694-325_4_ORF2	sp|Q9SD76|PHS2_ARATH	Q9SD76	PHS2_ARATH	0
Scaffold	2717-1255_1_ORF2	642	>sp|P47734|FADH_METMR_S-(hydroxymethyl)glutathione_dehydrogenase_OS=Methylobacter_marinus_GN=fdh_PE=3_SV=2|||1e-112	2717-1255_1_ORF2	46 kDa	1	-2.81	1	DOC	mapped	D8RK94	1099	D8RK94_SELML	1.38949e-116	tr|D8RK94|D8RK94_SELML	2717-1255_1_ORF2	tr|Q93ZM6|Q93ZM6_ARATH	Q93ZM6	Q93ZM6_ARATH	1.57747e-19
Scaffold	20821-547_6_ORF1	577	>sp|Q1PSI9|IDND_VITVI_L-idonate_5-dehydrogenase_OS=Vitis_vinifera_GN=VIT_16s0100g00290_PE=1_SV=2|||0	20821-547_6_ORF1	42 kDa	1	-2.81	1	DOC	mapped	D8SU49	1100	D8SU49_SELML	0	tr|D8SU49|D8SU49_SELML	20821-547_6_ORF1	sp|Q9FJ95|DHSO_ARATH	Q9FJ95	DHSO_ARATH	0
Scaffold	190175-146_3_ORF2	857	>sp|O65258|BAM2_ARATH_Beta-amylase_2,_chloroplastic_OS=Arabidopsis_thaliana_GN=BAM2_PE=1_SV=2|||0	190175-146_3_ORF2 (+1)	62 kDa	1	-2.81	1	DOC	mapped	D8SVN8	1101	D8SVN8_SELML	0	tr|D8SVN8|D8SVN8_SELML	190175-146_3_ORF2	sp|O65258|BAM2_ARATH	O65258	BAM2_ARATH	0
Scaffold	178804-157_3_ORF2	459	>sp|Q8KU07|AZOB_XENAZ_NAD(P)H_azoreductase_OS=Xenophilus_azovorans_GN=azoB_PE=1_SV=2|||2e-28	178804-157_3_ORF2 (+1)	35 kDa	1	-2.81	1	DOC	notMapped		1102				178804-157_3_ORF2	noOrthologue	noOrthologue	noOrthologue	notMapped
Scaffold	165303-173_5_ORF1	1081	Cluster of no_acceptable_match|||NA (165303-173_5_ORF1)	165303-173_5_ORF1 [19]	123 kDa	1	-2.81	1	DOC	mapped	D8RMM3	1103	D8RMM3_SELML	0	tr|D8RMM3|D8RMM3_SELML	165303-173_5_ORF1	sp|Q8RY24|SPSA3_ARATH	Q8RY24	SPSA3_ARATH	0
Scaffold	148886-199_2_ORF2	852	>sp|Q8TRL2|MRE11_METAC_DNA_double-strand_break_repair_protein_Mre11_OS=Methanosarcina_acetivorans_(strain_ATCC_35395_/_DSM_2834_/_JCM_12185_/_C2A)_GN=mre11_PE=3_SV=1|||6e-06	148886-199_2_ORF2	61 kDa	1	-2.81	1	DOC	notMapped		1104				148886-199_2_ORF2	noOrthologue	noOrthologue	noOrthologue	notMapped
Scaffold	117275-229_1_ORF1	155	>sp|P49215|RS17_SOLLC_40S_ribosomal_protein_S17_OS=Solanum_lycopersicum_GN=RPS17_PE=2_SV=3|||3e-77	117275-229_1_ORF1	20 kDa	1	-2.81	1	DOC	mapped	D8RLW3	1105	D8RLW3_SELML	6.03038e-75	tr|D8RLW3|D8RLW3_SELML	117275-229_1_ORF1	sp|Q9SQZ1|RS173_ARATH	Q9SQZ1	RS173_ARATH	4.39749e-67
Scaffold	tr|C1N5Y0|C1N5Y0_MICPC	1118	Predicted protein OS=Micromonas pusilla (strain CCMP1545) GN=MICPUCDRAFT_42732 PE=4 SV=1	tr|C1N5Y0|C1N5Y0_MICPC	244 kDa	1	-3	1	DOC	notMapped		1106				tr|C1N5Y0|C1N5Y0_MICPC	sp|Q9SL04|ATG8D_ARATH	Q9SL04	ATG8D_ARATH	2.39832e-70
Scaffold	61725-322_6_ORF3	1027	>sp|P37831|LOX11_SOLTU_Linoleate_9S-lipoxygenase_1_OS=Solanum_tuberosum_GN=LOX1.1_PE=2_SV=1|||0	61725-322_6_ORF3	95 kDa	1	-3	1	DOC	mapped	D8SDE9	1107	D8SDE9_SELML	0	tr|D8SDE9|D8SDE9_SELML	61725-322_6_ORF3	sp|Q9LNR3|LOX3_ARATH	Q9LNR3	LOX3_ARATH	0
Scaffold	247123-101_1_ORF1	551	Cluster of >sp|Q8H859|CADH1_ORYSJ_Probable_cinnamyl_alcohol_dehydrogenase_1_OS=Oryza_sativa_subsp._japonica_GN=CAD1_PE=2_SV=1|||8e-159 (247123-101_1_ORF1)	247123-101_1_ORF1 [4]	41 kDa	1	-3	1	DOC	mapped	D8SJJ0	1108	D8SJJ0_SELML	2.75922e-135	tr|D8SJJ0|D8SJJ0_SELML	247123-101_1_ORF1	sp|Q9CAI3|CADH1_ARATH	Q9CAI3	CADH1_ARATH	1.07779e-151
Scaffold	sp|O82803|SRPP_HEVBR	194	Small rubber particle protein OS=Hevea brasiliensis GN=SRPP PE=1 SV=1	sp|O82803|SRPP_HEVBR (+1)	22 kDa	1	-3.17	1	DOC	mapped	D8SZP3	1109	D8SZP3_SELML	3.38198e-41	tr|D8SZP3|D8SZP3_SELML	sp|O82803|SRPP_HEVBR	sp|Q9MA63|Y3550_ARATH	Q9MA63	Y3550_ARATH	1.01539e-67
Scaffold	19942-558_3_ORF1	46	>sp|Q9XFS7|NLTP5_ARATH_Non-specific_lipid-transfer_protein_5_OS=Arabidopsis_thaliana_GN=LTP5_PE=1_SV=1|||8e-29	19942-558_3_ORF1	13 kDa	1	-3.17	1	DOC	notMapped		1110				19942-558_3_ORF1	sp|Q9XFS7|NLTP5_ARATH	Q9XFS7	NLTP5_ARATH	1.18375e-24
Scaffold	137953-208_5_ORF1	5	no_acceptable_match|||NA	137953-208_5_ORF1	8 kDa	1	-3.17	1	DOC	mapped	D8S8X5	1111	D8S8X5_SELML	3.15052e-10	tr|D8S8X5|D8S8X5_SELML	137953-208_5_ORF1	sp|P59271|R27AA_ARATH	P59271	R27AA_ARATH	1.41214e-22
Scaffold	tr|B9IMD7|B9IMD7_POPTR	784	Predicted protein OS=Populus trichocarpa GN=POPTRDRAFT_911639 PE=3 SV=1	tr|B9IMD7|B9IMD7_POPTR	55 kDa	1	-3.32	1	DOC	notMapped		1112				tr|B9IMD7|B9IMD7_POPTR	sp|P20649|PMA1_ARATH	P20649	PMA1_ARATH	0
Scaffold	202811-135_3_ORF1	43	>sp|Q9T029|RS254_ARATH_40S_ribosomal_protein_S25-4_OS=Arabidopsis_thaliana_GN=RPS25E_PE=2_SV=1|||1e-48	202811-135_3_ORF1 (+1)	13 kDa	1	-3.32	1	DOC	mapped	D8RLJ6	1113	D8RLJ6_SELML	4.52415e-38	tr|D8RLJ6|D8RLJ6_SELML	202811-135_3_ORF1	sp|Q9T029|RS254_ARATH	Q9T029	RS254_ARATH	1.09252e-44
Scaffold	ZZ_FGCZCont0097	927	sp|ALBU_HUMAN|	ZZ_FGCZCont0097 (+1)	69 kDa	1	-3.46	1	DOC	notMapped		1114				ZZ_FGCZCont0097	tr|Q8H0S3|Q8H0S3_ARATH	Q8H0S3	Q8H0S3_ARATH	0
Scaffold	34437-432_2_ORF1	81	>sp|Q10N44|IN21A_ORYSJ_Protein_IN2-1_homolog_A_OS=Oryza_sativa_subsp._japonica_GN=Os03g0283200_PE=2_SV=1|||4e-45	34437-432_2_ORF1	16 kDa	1	-3.46	1	DOC	notMapped		1115				34437-432_2_ORF1	sp|Q9M2W2|GSTL2_ARATH	Q9M2W2	GSTL2_ARATH	1.26159e-39
Scaffold	76452-289_6_ORF2	1016	>sp|P37831|LOX11_SOLTU_Linoleate_9S-lipoxygenase_1_OS=Solanum_tuberosum_GN=LOX1.1_PE=2_SV=1|||0	76452-289_6_ORF2 (+1)	92 kDa	1	-3.58	1	DOC	notMapped		1116				76452-289_6_ORF2	sp|Q9SVY0|NRPA1_ARATH	Q9SVY0	NRPA1_ARATH	0
Scaffold	403431-22_6_ORF2	355	>sp|Q9SCU0|SDR2A_ARATH_Short-chain_dehydrogenase_reductase_2a_OS=Arabidopsis_thaliana_GN=SDR2a_PE=3_SV=1|||1e-88	403431-22_6_ORF2	30 kDa	1	-3.58	1	DOC	mapped	D8S556	1117	D8S556_SELML	2.07468e-77	tr|D8S556|D8S556_SELML	403431-22_6_ORF2	sp|Q9SCU0|SDR2A_ARATH	Q9SCU0	SDR2A_ARATH	1.96096e-85
Scaffold	184653-151_2_ORF2	73	>sp|Q830L4|RECR_ENTFA_Recombination_protein_RecR_OS=Enterococcus_faecalis_(strain_ATCC_700802_/_V583)_GN=recR_PE=3_SV=1|||5e-07	184653-151_2_ORF2	16 kDa	1	-3.58	1	DOC	notMapped		1118				184653-151_2_ORF2	noOrthologue	noOrthologue	noOrthologue	notMapped
Scaffold	ZZ_FGCZCont0256	64	P15252|REF_HEVBR Rubber elongation factor protein - Hevea brasiliensis (Para rubber tree)	ZZ_FGCZCont0256 (+3)	15 kDa	1	-3.7	1	DOC	mapped	D8RFN9	1119	D8RFN9_SELML	5.66733e-23	tr|D8RFN9|D8RFN9_SELML	ZZ_FGCZCont0256	tr|Q8H0S3|Q8H0S3_ARATH	Q8H0S3	Q8H0S3_ARATH	0
Scaffold	326628-54_2_ORF2	393	>sp|Q96262|PCAP1_ARATH_Plasma_membrane-associated_cation-binding_protein_1_OS=Arabidopsis_thaliana_GN=PCAP1_PE=1_SV=1|||4e-36	326628-54_2_ORF2	32 kDa	1	-4.09	1	DOC	notMapped		1120				326628-54_2_ORF2	sp|Q96262|PCAP1_ARATH	Q96262	PCAP1_ARATH	4.58676e-32
Scaffold	210715-128_4_ORF1	58	Cluster of >sp|Q0ANR8|RL30_MARMM_50S_ribosomal_protein_L30_OS=Maricaulis_maris_(strain_MCS10)_GN=rpmD_PE=3_SV=1|||2e-06 (210715-128_4_ORF1)	210715-128_4_ORF1 [3]	14 kDa	1	-4.45	1	DOC	notMapped		1121				210715-128_4_ORF1	noOrthologue	noOrthologue	noOrthologue	notMapped
Scaffold	272418-85_1_ORF2	483	>sp|P22242|DRPE_CRAPL_Desiccation-related_protein_PCC13-62_OS=Craterostigma_plantagineum_PE=2_SV=1|||7e-96	272418-85_1_ORF2	36 kDa	1	-4.46	1	DOC	mapped	D8R4F9	1122	D8R4F9_SELML	5.83741e-107	tr|D8R4F9|D8R4F9_SELML	272418-85_1_ORF2	tr|F4HWR0|F4HWR0_ARATH	F4HWR0	F4HWR0_ARATH	6.5842e-107
Scaffold	1738-1468_5_ORF1	584	Cluster of >sp|O49046|ARGI_SOYBN_Arginase_OS=Glycine_max_GN=AG1_PE=2_SV=1|||7e-171 (1738-1468_5_ORF1)	1738-1468_5_ORF1 [4]	43 kDa	1	-4.46	1	DOC	mapped	D8QQC6	1123	D8QQC6_SELML	3.83854e-165	tr|D8QQC6|D8QQC6_SELML	1738-1468_5_ORF1	sp|Q9ZPF5|ARGI2_ARATH	Q9ZPF5	ARGI2_ARATH	6.05311e-168
Scaffold	125304-220_5_ORF2	281	Cluster of >sp|Q6NRG0|RNF8B_XENLA_E3_ubiquitin-protein_ligase_RNF8-B_OS=Xenopus_laevis_GN=rnf8-b_PE=2_SV=1|||5e-12 (125304-220_5_ORF2)	125304-220_5_ORF2 [6]	27 kDa	1	-4.46	1	DOC	notMapped		1124				125304-220_5_ORF2	noOrthologue	noOrthologue	noOrthologue	notMapped
Scaffold	ZZ_FGCZCont0085	629	gi|88044|pir||S01068 keratin 4, type II, cytoskeletal - human (fragmen	ZZ_FGCZCont0085 (+1)	46 kDa	1	-5.29	1	DOC	notMapped		1125				ZZ_FGCZCont0085	tr|Q8H0S3|Q8H0S3_ARATH	Q8H0S3	Q8H0S3_ARATH	0
